# Supplementary material for: CRISPR Screen Identifies the RNA-Binding Protein Eef1a1 as a Key Regulator of Myogenesis
Source: Int J Mol Sci. 2024 Apr 28;25(9):4816. doi: 10.3390/ijms25094816 (PMC11084334; doi:10.3390/ijms25094816)
Supplement: Supplementary file 1 [file ijms-25-04816-s001.zip]

Archive with 7 entries (7 files):
- Supplemental Table S1. The control sgRNA sequences.xls
- Supplemental Table S2. RBP-Human-to-mouse.xls
- Supplemental Table S3. mouse-RBP-CRISPR-oligo pool.probe.xls
- Supplemental Table S4. Differentially enriched sgRNAs for Venn D1 vs D5.xlsx
- Supplemental Table S5. Oligonucleotides used in this study.xls
- Supplemental Table S6. Primer sequences for RT-qPCR..xls
- Supplementary Figure.pdf
