# Supplementary material for: CRISPR Screen Identifies the RNA-Binding Protein Eef1a1 as a Key Regulator of Myogenesis
Source: Int J Mol Sci. 2024 Apr 28;25(9):4816. doi: 10.3390/ijms25094816 (PMC11084334; doi:10.3390/ijms25094816)
Supplement: Supplementary file 1 [file ijms-25-04816-s001.zip › Supplemental Table S1. The control sgRNA sequences.xls]

## Sheet: Sheet1
sgRNA name	Sequence (5' to 3')
NC-sgRNA-1	CAGCTGGCGTAATAGCGAAG
NC-sgRNA-2	CCTTGTGGAGCGACATCCAG
NC-sgRNA-3	GGCACTTCACCGCTTGCCAG
NC-sgRNA-4	CGTTATCGCTATGACGGAAC
NC-sgRNA-5	TTTGCCCGGATAAACGGAAC
NC-sgRNA-6	CCAGACCGTTCATACAGAAC
NC-sgRNA-7	TCACCGCCGTAAGCCGACCA
NC-sgRNA-8	GAGCGAACGCGTAACGCGAA
NC-sgRNA-9	CACCGCCGTAAGCCGACCAC
NC-sgRNA-10	CAATATTGAAACCCACGGCA
NC-sgRNA-11	GACGAAGCCGCCCTGTAAAC
NC-sgRNA-12	ACGAAGCCGCCCTGTAAACG
NC-sgRNA-13	TCGCGTGGGCGTATTCGCAA
NC-sgRNA-14	CAAGACTGTTACCCATCGCG
NC-sgRNA-15	CGCCCGGTGCAGTATGAAGG
NC-sgRNA-16	CCGGTGCAGTATGAAGGCGG
NC-sgRNA-17	CGTATTCGCAAAGGATCAGC
NC-sgRNA-18	TTGCCCGATGTACGCGCGCG
NC-sgRNA-19	CCGCGTGCAGCAGATGGCGA
NC-sgRNA-20	CCATTTCGGCACAGCCGGGA
NC-sgRNA-21	CCTTCCCGGCTGTGCCGAAA
NC-sgRNA-22	TGGACCATTTCGGCACAGCC
NC-sgRNA-23	CATTTCGGCACAGCCGGGAA
NC-sgRNA-24	TGCGCAGCCTGAATGGCGAA
NC-sgRNA-25	GCGCGTCGTGATTAGCGCCG
NC-sgRNA-26	CCGCCGCCTTCATACTGCAC
NC-sgRNA-27	TTGCGAATACGCCCACGCGA
NC-sgRNA-28	CGCCTTCATACTGCACCGGG
NC-sgRNA-29	CATCGGGCAAATAATATCGG
NC-sgRNA-30	CGCCGCCTTCATACTGCACC
NC-sgRNA-31	TCATACTGCACCGGGCGGGA
NC-sgRNA-32	AACCCGTGGTCGGCTTACGG
NC-sgRNA-33	AGGGCGGCTTCGTCTGGGAC
NC-sgRNA-34	CTCATCGCCGGTAGCCAGCG
NC-sgRNA-35	GCCTTCATACTGCACCGGGC
NC-sgRNA-36	TCGCACAGCGTGTACCACAG
NC-sgRNA-37	TGTAGCGGCTGATGTTGAAC
NC-sgRNA-38	GATTCATTGGCACCATGCCG
NC-sgRNA-39	CGGATAATGCGAACAGCGCA
NC-sgRNA-40	CTGGTTTCCGGCACCAGAAG
NC-sgRNA-41	ACAGCGTGTACCACAGCGGA
NC-sgRNA-42	ACTGGAAGTCGCCGCGCCAC
NC-sgRNA-43	GGCGCTGGATGGTAAGCCGC
NC-sgRNA-44	TTAACGCCTCGAATCAGCAA
NC-sgRNA-45	CAGAAGCGGTGCCGGAAAGC
NC-sgRNA-46	TGCAACCGAACGCGACCGCA
NC-sgRNA-47	CCTCTGGATGTCGCTCCACA
NC-sgRNA-48	GCGACCGCATGGTCAGAAGC
NC-sgRNA-49	CGACCGCATGGTCAGAAGCC
NC-sgRNA-50	ACTGCCTGAACTACCGCAGC
NC-sgRNA-51	TCGATAATTTCACCGCCGAA
NC-sgRNA-52	AAGCCGGGCACATCAGCGCC
NC-sgRNA-53	AATTTCACCGCCGAAAGGCG
NC-sgRNA-54	GCATCTGACCACCAGCGAAA
NC-sgRNA-55	TCAGTTCACCCGTGCACCGC
NC-sgRNA-56	CAACTGGTAATGGTAGCGAC
NC-sgRNA-57	AACGCAGCACCATCACCGCG
NC-sgRNA-58	CCCGCATTGACCCTAACGCC
NC-sgRNA-59	CTAACGCCTGGGTCGAACGC
NC-sgRNA-60	GGTCGAACGCTGGAAGGCGG
NC-sgRNA-61	TGATTACGACCGCTCACGCG
NC-sgRNA-62	CTGGGTCGAACGCTGGAAGG
NC-sgRNA-63	GCGATACACCGCATCCGGCG
NC-sgRNA-64	GCGCTCAGGTCAAATTCAGA
NC-sgRNA-65	GATTGGCCTGAACTGCCAGC
NC-sgRNA-66	CCTGAACTGCCAGCTGGCGC
NC-sgRNA-67	AGGTAGCAGAGCGGGTAAAC
NC-sgRNA-68	TTCTCCGTGGGAACAAACGG
NC-sgRNA-69	CGCTTCTGGTGCCGGAAACC
NC-sgRNA-70	TATGGCCCACACCAGTGGCG
NC-sgRNA-71	CCATCGCCATCTGCTGCACG
NC-sgRNA-72	CTCTTCGCTATTACGCCAGC
NC-sgRNA-73	TGCACGCGGAAGAAGGCACA
NC-sgRNA-74	CTATTACGCCAGCTGGCGAA
NC-sgRNA-75	GGCTGCGCAACTGTTGGGAA
NC-sgRNA-76	TATTACGCCAGCTGGCGAAA
NC-sgRNA-77	TTACGCCAGCTGGCGAAAGG
NC-sgRNA-78	CGATTAAGTTGGGTAACGCC
NC-sgRNA-79	GCGGAATTCCAGCTGAGCGC
NC-sgRNA-80	CAATCCGCCGTTTGTTCCCA
NC-sgRNA-81	CTGACAATGGCAGATCCCAG
NC-sgRNA-82	TGTTCCCACGGAGAATCCGA
NC-sgRNA-83	GATTAAGTTGGGTAACGCCA
NC-sgRNA-84	GCGTTTCATCTGTGGTGCAA
NC-sgRNA-85	CAGTTCAGGCCAATCCGCGC
NC-sgRNA-86	CGTTTCATCTGTGGTGCAAC
NC-sgRNA-87	CGCCTTCCAGCGTTCGACCC
NC-sgRNA-88	GCAACAACGCTGCTTCGGCC
NC-sgRNA-89	ATCTGTGGTGCAACGGGCGC
NC-sgRNA-90	ACGCCAATGTCGTTATCCAG
NC-sgRNA-91	GGTGAAATTATCGATGAGCG
NC-sgRNA-92	TGGTCAGATGCGGGATGGCG
NC-sgRNA-93	TTTATGGCAGGGTGAAACGC
NC-sgRNA-94	GCTGGTGGTCAGATGCGGGA
NC-sgRNA-95	CTGCGATGTCGGTTTCCGCG
NC-sgRNA-96	CCCGAATCTCTATCGTGCGG
NC-sgRNA-97	CGCAGGCAGTTCTATGCGGA
NC-sgRNA-98	AGGTAACCCAGTAGATCCAG
NC-sgRNA-99	GCAGGCAGTTCTATGCGGAA
NC-sgRNA-100	AGCTATTCTGATTACACCCG
NC-sgRNA-101	GCTATTCTGATTACACCCGA
NC-sgRNA-102	ACGCTGGGCGTTAATCAGAG
NC-sgRNA-103	GACCAACGCCTTGATTGACA
NC-sgRNA-104	CTATTCTGATTACACCCGAG
NC-sgRNA-105	TATTCTGATTACACCCGAGG
NC-sgRNA-106	AACGCCTTGATTGACAAGGA
NC-sgRNA-107	ATAAATAACGCGCCCAACAC
NC-sgRNA-108	CAACATCTTCGACGCGGGCG
NC-sgRNA-109	GGTCTTCCCGACGATGACGC
NC-sgRNA-110	CATAGCTTCTGCCAACCGAA
NC-sgRNA-111	TTTGTGGACGAAGTACCGAA
NC-sgRNA-112	CTTATGCAGTTGCTCTCCAG
NC-sgRNA-113	GATCCTCATAAAGGCCAAGA
NC-sgRNA-114	TCTAGAGGATAGAATGGCGC
NC-sgRNA-115	TATCGATTCCAATTCAGCGG
NC-sgRNA-116	CTTGTCGTATCCCTGGAAGA
NC-sgRNA-117	ACAACTTTACCGACCGCGCC
NC-sgRNA-118	CCTCTAGAGGATGGAACCGC
NC-sgRNA-119	GGCATGCGAGAATCTGACGC
NC-sgRNA-120	GGCTATGAAGAGATACGCCC
