# Supplementary material for: CRISPR Screen Identifies the RNA-Binding Protein Eef1a1 as a Key Regulator of Myogenesis
Source: Int J Mol Sci. 2024 Apr 28;25(9):4816. doi: 10.3390/ijms25094816 (PMC11084334; doi:10.3390/ijms25094816)
Supplement: Supplementary file 1 [file ijms-25-04816-s001.zip › Supplemental Table S2. RBP-Human-to-mouse.xls]

## Sheet: RBP table
gene name	description	gene id	protein id	Mouse_Gene_id	Mouse_gene_symbol
RPS11	ribosomal protein S11 [Source:HGNC Symbol;Acc:10384]	ENSG00000142534	ENSP00000470447	ENSMUSG00000003429	Rps11
ERAL1	Era G-protein-like 1 (E. coli) [Source:HGNC Symbol;Acc:3424]	ENSG00000132591	ENSP00000254928	ENSMUSG00000020832	Eral1
DDX27	DEAD (Asp-Glu-Ala-Asp) box polypeptide 27 [Source:HGNC Symbol;Acc:15837]	ENSG00000124228	ENSP00000360828	ENSMUSG00000017999	Ddx27
DEK	DEK oncogene [Source:HGNC Symbol;Acc:2768]	ENSG00000124795	ENSP00000380414	ENSMUSG00000021377	Dek
PSMA6	proteasome (prosome, macropain) subunit, alpha type, 6 [Source:HGNC Symbol;Acc:9535]	ENSG00000100902	ENSP00000261479	ENSMUSG00000021024	Psma6
TRIM56	tripartite motif containing 56 [Source:HGNC Symbol;Acc:19028]	ENSG00000169871	ENSP00000305161	ENSMUSG00000043279	Trim56
TRIM71	TRIM71 tripartite motif containing 71, E3 ubiquitin protein ligase [ Homo sapiens (human) ]	ENSG00000206557	ENSP00000373272	ENSMUSG00000079259	Trim71
UPF2	UPF2 regulator of nonsense transcripts homolog (yeast) [Source:HGNC Symbol;Acc:17854]	ENSG00000151461	ENSP00000348708	ENSMUSG00000043241	Upf2
FARS2	phenylalanyl-tRNA synthetase 2, mitochondrial [Source:HGNC Symbol;Acc:21062]	ENSG00000145982	ENSP00000316335	ENSMUSG00000021420	Fars2
FDXACB1	ferredoxin-fold anticodon binding domain containing 1 [Source:HGNC Symbol;Acc:25110]	ENSG00000262028	ENSP00000460095	ENSMUSG00000037845	Fdxacb1
ALKBH8	alkB, alkylation repair homolog 8 (E. coli) [Source:HGNC Symbol;Acc:25189]	ENSG00000137760	ENSP00000415885	ENSMUSG00000025899	Alkbh8
ZNF579	zinc finger protein 579 [Source:HGNC Symbol;Acc:26646]	ENSG00000218891	ENSP00000320188	ENSMUSG00000051550	Zfp579
POLR2B	polymerase (RNA) II (DNA directed) polypeptide B, 140kDa [Source:HGNC Symbol;Acc:9188]	ENSG00000047315	ENSP00000391452	ENSMUSG00000029250	Polr2b
WDR12	WD repeat domain 12 [Source:HGNC Symbol;Acc:14098]	ENSG00000138442	ENSP00000261015	ENSMUSG00000026019	Wdr12
RPF1	ribosome production factor 1 homolog (S. cerevisiae) [Source:HGNC Symbol;Acc:30350]	ENSG00000117133	ENSP00000359688	ENSMUSG00000028187	Rpf1
MRPS34	mitochondrial ribosomal protein S34 [Source:HGNC Symbol;Acc:16618]	ENSG00000074071	ENSP00000380531	ENSMUSG00000038880	Mrps34
UBTF	upstream binding transcription factor, RNA polymerase I [Source:HGNC Symbol;Acc:12511]	ENSG00000108312	ENSP00000302640	ENSMUSG00000020923	Ubtf
CDC5L	cell division cycle 5-like [Source:HGNC Symbol;Acc:1743]	ENSG00000096401	ENSP00000360532	ENSMUSG00000112919	Gm9049
DAZAP1	DAZ associated protein 1 [Source:HGNC Symbol;Acc:2683]	ENSG00000071626	ENSP00000233078	ENSMUSG00000069565	Dazap1
MSI1	musashi RNA-binding protein 1 [Source:HGNC Symbol;Acc:7330]	ENSG00000135097	ENSP00000257552	ENSMUSG00000054256	Msi1
MSI2	musashi RNA-binding protein 2 [Source:HGNC Symbol;Acc:18585]	ENSG00000153944	ENSP00000414671	ENSMUSG00000069769	Msi2
TARDBP	TAR DNA binding protein [Source:HGNC Symbol;Acc:11571]	ENSG00000120948	ENSP00000404666	ENSMUSG00000041459	Tardbp
TRIT1	tRNA isopentenyltransferase 1 [Source:HGNC Symbol;Acc:20286]	ENSG00000043514	ENSP00000361905	ENSMUSG00000028653	Trit1
MRPL36	mitochondrial ribosomal protein L36 [Source:HGNC Symbol;Acc:14490]	ENSG00000171421	ENSP00000372093	ENSMUSG00000021607	Mrpl36
KPNB1	karyopherin (importin) beta 1 [Source:HGNC Symbol;Acc:6400]	ENSG00000108424	ENSP00000290158	ENSMUSG00000001440	Kpnb1
ZNFX1	zinc finger, NFX1-type containing 1 [Source:HGNC Symbol;Acc:29271]	ENSG00000124201	ENSP00000379412	ENSMUSG00000039501	Znfx1
SNRNP27	small nuclear ribonucleoprotein 27kDa (U4/U6.U5) [Source:HGNC Symbol;Acc:30240]	ENSG00000124380	ENSP00000244227	ENSMUSG00000001158	Snrnp27
RBMS2	RNA binding motif, single stranded interacting protein 2 [Source:HGNC Symbol;Acc:9909]	ENSG00000076067	ENSP00000262031	ENSMUSG00000040043	Rbms2
RBMS1	RNA binding motif, single stranded interacting protein 1 [Source:HGNC Symbol;Acc:9907]	ENSG00000153250	ENSP00000387280	ENSMUSG00000026970	Rbms1
RBMS3	RNA binding motif, single stranded interacting protein 3 [Source:HGNC Symbol;Acc:13427]	ENSG00000144642	ENSP00000391934	ENSMUSG00000039607	Rbms3
LARS2	leucyl-tRNA synthetase 2, mitochondrial [Source:HGNC Symbol;Acc:17095]	ENSG00000011376	ENSP00000412893	ENSMUSG00000035202	Lars2
KIAA0020	KIAA0020 [Source:HGNC Symbol;Acc:29676]	ENSG00000080608	ENSP00000380982	ENSMUSG00000041360	Pum3
RBFOX1	RNA binding protein, fox-1 homolog (C. elegans) 1 [Source:HGNC Symbol;Acc:18222]	ENSG00000078328	ENSP00000344196	ENSMUSG00000008658	Rbfox1
RBFOX2	RNA binding protein, fox-1 homolog (C. elegans) 2 [Source:HGNC Symbol;Acc:9906]	ENSG00000100320	ENSP00000352328	ENSMUSG00000033565	Rbfox2
RBFOX3	RNA binding protein, fox-1 homolog (C. elegans) 3 [Source:HGNC Symbol;Acc:27097]	ENSG00000267483	ENSP00000467132	ENSMUSG00000025576	Rbfox3
CWF19L1	CWF19-like 1, cell cycle control (S. pombe) [Source:HGNC Symbol;Acc:25613]	ENSG00000095485	ENSP00000326411	ENSMUSG00000025200	Cwf19l1
CWF19L2	CWF19-like 2, cell cycle control (S. pombe) [Source:HGNC Symbol;Acc:26508]	ENSG00000152404	ENSP00000282251	ENSMUSG00000025898	Cwf19l2
ZC3H15	zinc finger CCCH-type containing 15 [Source:HGNC Symbol;Acc:29528]	ENSG00000065548	ENSP00000338788	ENSMUSG00000027091	Zc3h15
LONP1	lon peptidase 1, mitochondrial [Source:HGNC Symbol;Acc:9479] [Type: protein coding Ensembl/Havana merge]	ENSG00000196365	ENSP00000353826	ENSMUSG00000041168	Lonp1
DBR1	debranching enzyme homolog 1 (S. cerevisiae) [Source:HGNC Symbol;Acc:15594]	ENSG00000138231	ENSP00000260803	ENSMUSG00000032469	Dbr1
RRP15	ribosomal RNA processing 15 homolog (S. cerevisiae) [Source:HGNC Symbol;Acc:24255]	ENSG00000067533	ENSP00000355899	ENSMUSG00000001305	Rrp15
L1TD1	INE-1 type transposase domain containing 1 [Source:HGNC Symbol;Acc:25595]	ENSG00000240563	ENSP00000419901	ENSMUSG00000087166	L1td1
NMD3	NMD3 homolog (S. cerevisiae) [Source:HGNC Symbol;Acc:24250]	ENSG00000169251	ENSP00000418908	ENSMUSG00000027787	Nmd3
SRSF10	cDNA FLJ30749 fis, clone FEBRA2000402, highly similar to FUS-interacting serine-arginine-rich protein 1; cDNA FLJ43846 fis, clone TESTI4006393, highly similar to FUS-interacting serine-arginine-rich protein 1 [Source:UniProtKB/TrEMBL;Acc:B3KNY6]	ENSG00000215699	ENSP00000363573	ENSMUSG00000028676	Srsf10
SRSF12	serine/arginine-rich splicing factor 12 [Source:HGNC Symbol;Acc:21220]	ENSG00000154548	ENSP00000414302	ENSMUSG00000054679	Srsf12
SRSF2	serine/arginine-rich splicing factor 2 [Source:HGNC Symbol;Acc:10783]	ENSG00000161547	ENSP00000463317	ENSMUSG00000034120	Srsf2
SRSF8	serine/arginine-rich splicing factor 8 [Source:HGNC Symbol;Acc:16988]	ENSG00000180771	ensembl pseudogene- ncbi protein coding gene	#N/A	#N/A
RSL1D1	ribosomal L1 domain containing 1 [Source:HGNC Symbol;Acc:24534]	ENSG00000171490	ENSP00000460343	ENSMUSG00000005846	Rsl1d1
DAP3	death associated protein 3 [Source:HGNC Symbol;Acc:2673]	ENSG00000132676	ENSP00000341692	ENSMUSG00000068921	Dap3
NARS2	asparaginyl-tRNA synthetase 2, mitochondrial (putative) [Source:HGNC Symbol;Acc:26274]	ENSG00000137513	ENSP00000432240	ENSMUSG00000018995	Nars2
RBM25	RNA binding motif protein 25 [Source:HGNC Symbol;Acc:23244]	ENSG00000119707	ENSP00000431150	ENSMUSG00000010608	Rbm25
POLR2E	polymerase (RNA) II (DNA directed) polypeptide E, 25kDa [Source:HGNC Symbol;Acc:9192]	ENSG00000099817	ENSP00000215587	ENSMUSG00000004667	Polr2e
TOE1	target of EGR1, member 1 (nuclear) [Source:HGNC Symbol;Acc:15954]	ENSG00000132773	ENSP00000361162	ENSMUSG00000028688	Toe1
TSFM	Ts translation elongation factor, mitochondrial [Source:HGNC Symbol;Acc:12367]	ENSG00000123297	ENSP00000313877	ENSMUSG00000040521	Tsfm
TPR	translocated promoter region, nuclear basket protein [Source:HGNC Symbol;Acc:12017]	ENSG00000047410	ENSP00000356448	ENSMUSG00000006005	Tpr
STAU1	staufen, RNA binding protein, homolog 1 (Drosophila) [Source:HGNC Symbol;Acc:11370]	ENSG00000124214	ENSP00000360893	ENSMUSG00000039536	Stau1
STAU2	staufen, RNA binding protein, homolog 2 (Drosophila) [Source:HGNC Symbol;Acc:11371]	ENSG00000040341	ENSP00000429973	ENSMUSG00000025920	Stau2
TRMT1L	tRNA methyltransferase 1 homolog (S. cerevisiae)-like [Source:HGNC Symbol;Acc:16782]	ENSG00000121486	ENSP00000356476	ENSMUSG00000053286	Trmt1l
METTL3	methyltransferase like 3 [Source:HGNC Symbol;Acc:17563]	ENSG00000165819	ENSP00000298717	ENSMUSG00000022160	Mettl3
REXO2	REX2, RNA exonuclease 2 homolog (S. cerevisiae) [Source:HGNC Symbol;Acc:17851]	ENSG00000076043	ENSP00000442162	ENSMUSG00000032026	Rexo2
MRPL52	mitochondrial ribosomal protein L52 [Source:HGNC Symbol;Acc:16655]	ENSG00000172590	ENSP00000347277	ENSMUSG00000010406	Mrpl52
WDR3	WD repeat domain 3 [Source:HGNC Symbol;Acc:12755]	ENSG00000065183	ENSP00000308179	ENSMUSG00000033285	Wdr3
CNOT11	CCR4-NOT transcription complex, subunit 11 [Source:HGNC Symbol;Acc:25217] [Type: protein coding Ensembl/Havana merge]	ENSG00000158435	ENSP00000289382	ENSMUSG00000003135	Cnot11
YTHDC1	YTH domain-containing protein 1 [Source:UniProtKB/TrEMBL;Acc:J3KS01]	ENSG00000257413	ENSP00000447653	ENSMUSG00000035851	Ythdc1
METTL2A	methyltransferase like 2A [Source:HGNC Symbol;Acc:25755]	ENSG00000087995	ENSP00000309610	ENSMUSG00000020691	Mettl2
METTL2B	methyltransferase like 2B [Source:HGNC Symbol;Acc:18272]	ENSG00000165055	ENSP00000262432	ENSMUSG00000020691	Mettl2
ZNF326	zinc finger protein 326 [Source:HGNC Symbol;Acc:14104]	ENSG00000162664	ENSP00000403470	ENSMUSG00000029290	Zfp326
AKAP8	A kinase (PRKA) anchor protein 8 [Source:HGNC Symbol;Acc:378]	ENSG00000105127	ENSP00000269701	ENSMUSG00000024045	Akap8
AKAP8L	A kinase (PRKA) anchor protein 8-like [Source:HGNC Symbol;Acc:29857]	ENSG00000011243	ENSP00000470952	ENSMUSG00000002625	Akap8l
RPS14	ribosomal protein S14 [Source:HGNC Symbol;Acc:10387]	ENSG00000164587	ENSP00000428536	ENSMUSG00000024608	Rps14
ELAVL1	ELAV (embryonic lethal, abnormal vision, Drosophila)-like 1 (Hu antigen R) [Source:HGNC Symbol;Acc:3312]	ENSG00000066044	ENSP00000472197	ENSMUSG00000040028	Elavl1
ELAVL2	ELAV (embryonic lethal, abnormal vision, Drosophila)-like 2 (Hu antigen B) [Source:HGNC Symbol;Acc:3313]	ENSG00000107105	ENSP00000369460	ENSMUSG00000008489	Elavl2
ELAVL3	ELAV (embryonic lethal, abnormal vision, Drosophila)-like 3 (Hu antigen C) [Source:HGNC Symbol;Acc:3314]	ENSG00000196361	ENSP00000390878	ENSMUSG00000003410	Elavl3
ELAVL4	ELAV (embryonic lethal, abnormal vision, Drosophila)-like 4 [Source:HGNC Symbol;Acc:3315]	ENSG00000162374	ENSP00000399939	ENSMUSG00000028546	Elavl4
PNN	pinin, desmosome associated protein [Source:HGNC Symbol;Acc:9162]	ENSG00000100941	ENSP00000216832	ENSMUSG00000020994	Pnn
DDX41	DEAD (Asp-Glu-Ala-Asp) box polypeptide 41 [Source:HGNC Symbol;Acc:18674]	ENSG00000183258	ENSP00000330349	ENSMUSG00000021494	Ddx41
TNPO2	transportin 2 [Source:HGNC Symbol;Acc:19998]	ENSG00000105576	ENSP00000397379	ENSMUSG00000031691	Tnpo2
TNPO1	transportin 1 [Source:HGNC Symbol;Acc:6401]	ENSG00000083312	ENSP00000336712	ENSMUSG00000009470	Tnpo1
PUSL1	pseudouridylate synthase-like 1 [Source:HGNC Symbol;Acc:26914]	ENSG00000169972	ENSP00000368318	ENSMUSG00000051557	Pusl1
RBM43	RNA binding motif protein 43 [Source:HGNC Symbol;Acc:24790]	ENSG00000184898	ENSP00000331211	ENSMUSG00000036249	Rbm43
ZGPAT	zinc finger, CCCH-type with G patch domain [Source:HGNC Symbol;Acc:15948]	ENSG00000197114	ENSP00000332013	ENSMUSG00000027582	Zgpat
SCAF11	SR-related CTD-associated factor 11 [Source:HGNC Symbol;Acc:10784]	ENSG00000139218	ENSP00000358374	ENSMUSG00000033228	Scaf11
USP39	ubiquitin specific peptidase 39 [Source:HGNC Symbol;Acc:20071]	ENSG00000168883	ENSP00000312981	ENSMUSG00000056305	Usp39
RPL38	ribosomal protein L38 [Source:HGNC Symbol;Acc:10349]	ENSG00000172809	ENSP00000462580	ENSMUSG00000057322	Rpl38
NARS	asparaginyl-tRNA synthetase [Source:HGNC Symbol;Acc:7643]	ENSG00000134440	ENSP00000256854	ENSMUSG00000024587	Nars
RPS16	ribosomal protein S16 [Source:HGNC Symbol;Acc:10396]	ENSG00000105193	ENSP00000251453	ENSMUSG00000037563	Rps16
CLASRP	CLK4-associating serine/arginine rich protein [Source:HGNC Symbol;Acc:17731]	ENSG00000104859	ENSP00000465562	ENSMUSG00000061028	Clasrp
RPS9	ribosomal protein S9 [Source:HGNC Symbol;Acc:10442]	ENSG00000170889	ENSP00000302896	ENSMUSG00000006333	Rps9
TOP3B	topoisomerase (DNA) III beta [Source:HGNC Symbol;Acc:11993]	ENSG00000100038	ENSP00000349705	ENSMUSG00000022779	Top3b
NCBP2L	nuclear cap binding protein subunit 2-like [Source:HGNC Symbol;Acc:31795]	ENSG00000170935	ENSP00000361454	#N/A	#N/A
NCBP2	nuclear cap binding protein subunit 2, 20kDa [Source:HGNC Symbol;Acc:7659]	ENSG00000114503	ENSP00000389315	ENSMUSG00000022774	Ncbp2
SMG9	smg-9 homolog, nonsense mediated mRNA decay factor (C. elegans) [Source:HGNC Symbol;Acc:25763]	ENSG00000105771	ENSP00000270066	ENSMUSG00000002210	Smg9
FTSJ2	FtsJ RNA methyltransferase homolog 2 (E. coli) [Source:HGNC Symbol;Acc:16352]	ENSG00000122687	ENSP00000392343	ENSMUSG00000029557	Mrm2
DDX56	DEAD (Asp-Glu-Ala-Asp) box helicase 56 [Source:HGNC Symbol;Acc:18193]	ENSG00000136271	ENSP00000258772	ENSMUSG00000004393	Ddx56
RBM28	RNA binding motif protein 28 [Source:HGNC Symbol;Acc:21863]	ENSG00000106344	ENSP00000223073	ENSMUSG00000029701	Rbm28
UTP11L	UTP11-like, U3 small nucleolar ribonucleoprotein, (yeast) [Source:HGNC Symbol;Acc:24329]	ENSG00000183520	ENSP00000362105	ENSMUSG00000028907	Utp11
MRPS18B	mitochondrial ribosomal protein S18B [Source:HGNC Symbol;Acc:14516]	ENSG00000223775	ENSP00000402718	ENSMUSG00000024436	Mrps18b
RPL14	ribosomal protein L14 [Source:HGNC Symbol;Acc:10305]	ENSG00000188846	ENSP00000379506	ENSMUSG00000025794	Rpl14
RPL37	ribosomal protein L37 [Source:HGNC Symbol;Acc:10347]	ENSG00000145592	ENSP00000422823	ENSMUSG00000041841	Rpl37
GEMIN5	gem (nuclear organelle) associated protein 5 [Source:HGNC Symbol;Acc:20043]	ENSG00000082516	ENSP00000285873	ENSMUSG00000037275	Gemin5
MKRN1	makorin ring finger protein 1 [Source:HGNC Symbol;Acc:7112]	ENSG00000133606	ENSP00000416369	ENSMUSG00000029922	Mkrn1
MKRN2	makorin ring finger protein 2 [Source:HGNC Symbol;Acc:7113]	ENSG00000075975	ENSP00000170447	ENSMUSG00000000439	Mkrn2
MKRN3	makorin ring finger protein 3 [Source:HGNC Symbol;Acc:7114]	ENSG00000179455	ENSP00000313881	ENSMUSG00000070527	Mkrn3
NOA1	nitric oxide associated 1 [Source:HGNC Symbol;Acc:28473]	ENSG00000084092	ENSP00000264230	ENSMUSG00000036285	Noa1
PINX1	PIN2/TERF1 interacting, telomerase inhibitor 1 [Source:HGNC Symbol;Acc:30046]	ENSG00000254093	ENSP00000318966	ENSMUSG00000021958	Pinx1
HRSP12	heat-responsive protein 12 [Source:HGNC Symbol;Acc:16897]	ENSG00000132541	ENSP00000428596	ENSMUSG00000022323	Rida
TDRD9	tudor domain containing 9 [Source:HGNC Symbol;Acc:20122]	ENSG00000156414	ENSP00000343545	ENSMUSG00000054003	Tdrd9
DHX30	DEAH (Asp-Glu-Ala-His) box polypeptide 30 [Source:HGNC Symbol;Acc:16716]	ENSG00000132153	ENSP00000343442	ENSMUSG00000032480	Dhx30
DHX29	DEAH (Asp-Glu-Ala-His) box polypeptide 29 [Source:HGNC Symbol;Acc:15815]	ENSG00000067248	ENSP00000251636	ENSMUSG00000042426	Dhx29
DHX57	DEAH (Asp-Glu-Ala-Asp/His) box polypeptide 57 [Source:HGNC Symbol;Acc:20086]	ENSG00000163214	ENSP00000295373	ENSMUSG00000035051	Dhx57
YTHDC2	YTH domain containing 2 [Source:HGNC Symbol;Acc:24721]	ENSG00000047188	ENSP00000161863	ENSMUSG00000034653	Ythdc2
DHX36	DEAH (Asp-Glu-Ala-His) box polypeptide 36 [Source:HGNC Symbol;Acc:14410]	ENSG00000174953	ENSP00000417078	ENSMUSG00000027770	Dhx36
DHX9	DEAH (Asp-Glu-Ala-His) box polypeptide 9 [Source:HGNC Symbol;Acc:2750]	ENSG00000135829	ENSP00000356520	ENSMUSG00000042699	Dhx9
EIF3G	eukaryotic translation initiation factor 3, subunit G [Source:HGNC Symbol;Acc:3274]	ENSG00000130811	ENSP00000466860	ENSMUSG00000070319	Eif3g
NOL10	nucleolar protein 10 [Source:HGNC Symbol;Acc:25862]	ENSG00000115761	ENSP00000263837	ENSMUSG00000061458	Nol10
UTP15	UTP15, U3 small nucleolar ribonucleoprotein, homolog (S. cerevisiae) [Source:HGNC Symbol;Acc:25758]	ENSG00000164338	ENSP00000421669	ENSMUSG00000041747	Utp15
GATC	glutamyl-tRNA(Gln) amidotransferase, subunit C [Source:HGNC Symbol;Acc:25068]	ENSG00000257218	ENSP00000446872	ENSMUSG00000029536	Gatc
TCOF1	Treacher Collins-Franceschetti syndrome 1 [Source:HGNC Symbol;Acc:11654]	ENSG00000070814	ENSP00000409944	ENSMUSG00000024613	Tcof1
NONO	non-POU domain containing, octamer-binding [Source:HGNC Symbol;Acc:7871]	ENSG00000147140	ENSP00000441364	ENSMUSG00000031311	Nono
PSPC1	paraspeckle component 1 [Source:HGNC Symbol;Acc:20320]	ENSG00000121390	ENSP00000393069	ENSMUSG00000021938	Pspc1
SFPQ	splicing factor proline/glutamine-rich [Source:HGNC Symbol;Acc:10774]	ENSG00000116560	ENSP00000349748	ENSMUSG00000028820	Sfpq
NUDT21	nudix (nucleoside diphosphate linked moiety X)-type motif 21 [Source:HGNC Symbol;Acc:13870]	ENSG00000167005	ENSP00000300291	ENSMUSG00000031754	Nudt21
MRPL19	mitochondrial ribosomal protein L19 [Source:HGNC Symbol;Acc:14052]	ENSG00000115364	ENSP00000377486	ENSMUSG00000030045	Mrpl19
URM1	ubiquitin related modifier 1 [Source:HGNC Symbol;Acc:28378]	ENSG00000167118	ENSP00000361941	ENSMUSG00000069020	Urm1
MRPL53	mitochondrial ribosomal protein L53 [Source:HGNC Symbol;Acc:16684]	ENSG00000204822	ENSP00000258105	ENSMUSG00000030037	Mrpl53
RBM48	RNA binding motif protein 48 [Source:HGNC Symbol;Acc:21785]	ENSG00000127993	ENSP00000419242	ENSMUSG00000040302	Rbm48
REPIN1	replication initiator 1 [Source:HGNC Symbol;Acc:17922]	ENSG00000214022	ENSP00000417291	ENSMUSG00000052751	Repin1
ZC3H12B	zinc finger CCCH-type containing 12B [Source:HGNC Symbol;Acc:17407]	ENSG00000102053	ENSP00000408077	ENSMUSG00000035045	Zc3h12b
ZC3H12C	zinc finger CCCH-type containing 12C [Source:HGNC Symbol;Acc:29362]	ENSG00000149289	ENSP00000278590	ENSMUSG00000035164	Zc3h12c
ZC3H12D	zinc finger CCCH-type containing 12D [Source:HGNC Symbol;Acc:21175]	ENSG00000178199	ENSP00000374592	ENSMUSG00000039981	Zc3h12d
ZC3H12A	zinc finger CCCH-type containing 12A [Source:HGNC Symbol;Acc:26259]	ENSG00000163874	ENSP00000362179	ENSMUSG00000042677	Zc3h12a
TRMT5	tRNA methyltransferase 5 homolog (S. cerevisiae) [Source:HGNC Symbol;Acc:23141]	ENSG00000126814	ENSP00000261249	ENSMUSG00000034442	Trmt5
TRMT61A	tRNA methyltransferase 61 homolog A (S. cerevisiae) [Source:HGNC Symbol;Acc:23790]	ENSG00000166166	ENSP00000299202	ENSMUSG00000060950	Trmt61a
PABPN1L	poly(A) binding protein, nuclear 1-like (cytoplasmic) [Source:HGNC Symbol;Acc:37237]	ENSG00000205022	ENSP00000408598	ENSMUSG00000069867	Pabpn1l
PABPN1	poly(A) binding protein, nuclear 1 [Source:HGNC Symbol;Acc:8565]	ENSG00000100836	ENSP00000216727	ENSMUSG00000092232	Gm20521
LSG1	large subunit GTPase 1 homolog (S. cerevisiae) [Source:HGNC Symbol;Acc:25652]	ENSG00000041802	ENSP00000265245	ENSMUSG00000022538	Lsg1
GNL1	guanine nucleotide binding protein-like 1 [Source:HGNC Symbol;Acc:4413]	ENSG00000206412	ENSP00000372942	ENSMUSG00000024429	Gnl1
EEF1G	eukaryotic translation elongation factor 1 gamma [Source:HGNC Symbol;Acc:3213]	ENSG00000254772	ENSP00000331901	ENSMUSG00000071644	Eef1g
RBM33	RNA binding motif protein 33 [Source:HGNC Symbol;Acc:27223]	ENSG00000184863	ENSP00000376510	ENSMUSG00000048271	Rbm33
RPP25	ribonuclease P/MRP 25kDa subunit [Source:HGNC Symbol;Acc:30361]	ENSG00000178718	ENSP00000317691	ENSMUSG00000062309	Rpp25
RPP25L	ribonuclease P/MRP 25kDa subunit-like [Source:HGNC Symbol;Acc:19909]	ENSG00000164967	ENSP00000297613	ENSMUSG00000036114	Rpp25l
RPP38	ribonuclease P/MRP 38kDa subunit [Source:HGNC Symbol;Acc:30329]	ENSG00000152464	ENSP00000367443	ENSMUSG00000049950	Rpp38
GARS	glycyl-tRNA synthetase [Source:HGNC Symbol;Acc:4162]	ENSG00000106105	ENSP00000373918	ENSMUSG00000029777	Gars
DRG2	developmentally regulated GTP binding protein 2 [Source:HGNC Symbol;Acc:3030]	ENSG00000108591	ENSP00000225729	ENSMUSG00000020537	Drg2
TRMU	tRNA 5-methylaminomethyl-2-thiouridylate methyltransferase [Source:HGNC Symbol;Acc:25481]	ENSG00000100416	ENSP00000370407	ENSMUSG00000022386	Trmu
GNL2	guanine nucleotide binding protein-like 2 (nucleolar) [Source:HGNC Symbol;Acc:29925]	ENSG00000134697	ENSP00000362153	ENSMUSG00000028869	Gnl2
CPSF2	cleavage and polyadenylation specific factor 2, 100kDa [Source:HGNC Symbol;Acc:2325]	ENSG00000165934	ENSP00000298875	ENSMUSG00000041781	Cpsf2
CD3EAP	CD3e molecule, epsilon associated protein [Source:HGNC Symbol;Acc:24219]	ENSG00000117877	ENSP00000310966	ENSMUSG00000047649	Cd3eap
HDLBP	high density lipoprotein binding protein [Source:HGNC Symbol;Acc:4857]	ENSG00000115677	ENSP00000312042	ENSMUSG00000034088	Hdlbp
RDM1	RAD52 motif 1 [Source:HGNC Symbol;Acc:19950]	ENSG00000187456	ENSP00000378035	ENSMUSG00000010362	Rdm1
BYSL	bystin-like [Source:HGNC Symbol;Acc:1157]	ENSG00000112578	ENSP00000230340	ENSMUSG00000023988	Bysl
GEMIN8	gem (nuclear organelle) associated protein 8 [Source:HGNC Symbol;Acc:26044]	ENSG00000046647	ENSP00000369895	ENSMUSG00000040621	Gemin8
XPO5	exportin 5 [Source:HGNC Symbol;Acc:17675]	ENSG00000124571	ENSP00000265351	ENSMUSG00000067150	Xpo5
ZNF622	zinc finger protein 622 [Source:HGNC Symbol;Acc:30958]	ENSG00000173545	ENSP00000310042	ENSMUSG00000052253	Zfp622
DZIP1	DAZ interacting protein 1 [Source:HGNC Symbol;Acc:20908]	ENSG00000134874	ENSP00000257312	ENSMUSG00000042156	Dzip1
DZIP1L	DAZ interacting zinc finger protein 1-like [Source:HGNC Symbol;Acc:26551]	ENSG00000158163	ENSP00000332148	ENSMUSG00000037784	Dzip1l
GSPT1	G1 to S phase transition 1 [Source:HGNC Symbol;Acc:4621]	ENSG00000103342	ENSP00000408399	ENSMUSG00000062203	Gspt1
HBS1L	HBS1-like (S. cerevisiae) [Source:HGNC Symbol;Acc:4834]	ENSG00000112339	ENSP00000389826	ENSMUSG00000019977	Hbs1l
GSPT2	G1 to S phase transition 2 [Source:HGNC Symbol;Acc:4622]	ENSG00000268273	ENSP00000470900	ENSMUSG00000071723	Gspt2
EIF2D	eukaryotic translation initiation factor 2D [Source:HGNC Symbol;Acc:6583]	ENSG00000143486	ENSP00000271764	ENSMUSG00000026427	Eif2d
METTL1	methyltransferase like 1 [Source:HGNC Symbol;Acc:7030]	ENSG00000037897	ENSP00000314441	ENSMUSG00000006732	Mettl1
RNASEH1	ribonuclease H1 [Source:HGNC Symbol;Acc:18466]	ENSG00000171865	ENSP00000313350	ENSMUSG00000020630	Rnaseh1
ZNHIT6	zinc finger, HIT-type containing 6 [Source:HGNC Symbol;Acc:26089]	ENSG00000117174	ENSP00000414344	ENSMUSG00000074182	Znhit6
DARS2	aspartyl-tRNA synthetase 2, mitochondrial [Source:HGNC Symbol;Acc:25538]	ENSG00000117593	ENSP00000355086	ENSMUSG00000026709	Dars2
SNRPD2	small nuclear ribonucleoprotein D2 polypeptide 16.5kDa [Source:HGNC Symbol;Acc:11159]	ENSG00000125743	ENSP00000468247	ENSMUSG00000040824	Snrpd2
DICER1	dicer 1, ribonuclease type III [Source:HGNC Symbol;Acc:17098]	ENSG00000100697	ENSP00000437256	ENSMUSG00000041415	Dicer1
DYNLL1	dynein, light chain, LC8-type 1 [Source:HGNC Symbol;Acc:15476]	ENSG00000088986	ENSP00000376297	ENSMUSG00000009013	Dynll1
ZNF638	zinc finger protein 638 [Source:HGNC Symbol;Acc:17894]	ENSG00000075292	ENSP00000386433	ENSMUSG00000030016	Zfp638
SAMD4B	sterile alpha motif domain containing 4B [Source:HGNC Symbol;Acc:25492]	ENSG00000179134	ENSP00000317224	ENSMUSG00000109336	Samd4b
SAMD4A	sterile alpha motif domain containing 4A [Source:HGNC Symbol;Acc:23023] [Type: protein coding Ensembl/Havana merge]	ENSG00000020577	ENSP00000375919	ENSMUSG00000021838	Samd4
RTF1	Rtf1, Paf1/RNA polymerase II complex component, homolog (S. cerevisiae) [Source:HGNC Symbol;Acc:28996]	ENSG00000137815	ENSP00000452973	ENSMUSG00000027304	Rtf1
CNOT4	CCR4-NOT transcription complex, subunit 4 [Source:HGNC Symbol;Acc:7880]	ENSG00000080802	ENSP00000388491	ENSMUSG00000038784	Cnot4
TARBP2	TAR (HIV-1) RNA binding protein 2 [Source:HGNC Symbol;Acc:11569]	ENSG00000139546	ENSP00000266987	ENSMUSG00000023051	Tarbp2
PRKRA	protein kinase, interferon-inducible double stranded RNA dependent activator [Source:HGNC Symbol;Acc:9438]	ENSG00000180228	ENSP00000430604	ENSMUSG00000002731	Prkra
GLE1	GLE1 RNA export mediator homolog (yeast) [Source:HGNC Symbol;Acc:4315]	ENSG00000119392	ENSP00000438670	ENSMUSG00000019715	Gle1
EXOSC2	exosome component 2 [Source:HGNC Symbol;Acc:17097]	ENSG00000130713	ENSP00000361427	ENSMUSG00000039356	Exosc2
SSU72	SSU72 RNA polymerase II CTD phosphatase homolog (S. cerevisiae) [Source:HGNC Symbol;Acc:25016]	ENSG00000160075	ENSP00000291386	ENSMUSG00000029038	Ssu72
GTPBP10	GTP-binding protein 10 (putative) [Source:HGNC Symbol;Acc:25106]	ENSG00000105793	ENSP00000222511	ENSMUSG00000040464	Gtpbp10
RPL10A	ribosomal protein L10a [Source:HGNC Symbol;Acc:10299]	ENSG00000198755	ENSP00000363018	ENSMUSG00000037805	Rpl10a
HENMT1	HEN1 methyltransferase homolog 1 (Arabidopsis) [Source:HGNC Symbol;Acc:26400] [Type: protein coding Ensembl/Havana merge]	ENSG00000162639	ENSP00000359049	ENSMUSG00000045662	Henmt1
THOC2	THO complex 2 [Source:HGNC Symbol;Acc:19073]	ENSG00000125676	ENSP00000347959	ENSMUSG00000097392	Thoc2l
ENDOG	endonuclease G [Source:HGNC Symbol;Acc:3346]	ENSG00000167136	ENSP00000361725	ENSMUSG00000015337	Endog
EXOG	endo/exonuclease (5'-3'), endonuclease G-like [Source:HGNC Symbol;Acc:3347]	ENSG00000157036	ENSP00000350987	ENSMUSG00000042787	Exog
ASH1L	ash1 (absent, small, or homeotic)-like (Drosophila) [Source:HGNC Symbol;Acc:19088]	ENSG00000116539	ENSP00000357330	ENSMUSG00000028053	Ash1l
TRMT10C	tRNA methyltransferase 10 homolog C (S. cerevisiae) [Source:HGNC Symbol;Acc:26022]	ENSG00000174173	ENSP00000312356	ENSMUSG00000044763	Trmt10c
TRMT10A	tRNA methyltransferase 10 homolog A (S. cerevisiae) [Source:HGNC Symbol;Acc:28403]	ENSG00000145331	ENSP00000423628	ENSMUSG00000004127	Trmt10a
TRMT10B	tRNA methyltransferase 10 homolog B (S. cerevisiae) [Source:HGNC Symbol;Acc:26454]	ENSG00000165275	ENSP00000366982	ENSMUSG00000035601	Trmt10b
MRPL33	mitochondrial ribosomal protein L33 [Source:HGNC Symbol;Acc:14487]	ENSG00000243147	ENSP00000296102	ENSMUSG00000106918	Mrpl33
SSB	Sjogren syndrome antigen B (autoantigen La) [Source:HGNC Symbol;Acc:11316]	ENSG00000138385	ENSP00000260956	ENSMUSG00000068882	Ssb
LARP7	La ribonucleoprotein domain family, member 7 [Source:HGNC Symbol;Acc:24912]	ENSG00000174720	ENSP00000422626	ENSMUSG00000066107	Gm12666
MRPL24	mitochondrial ribosomal protein L24 [Source:HGNC Symbol;Acc:14037]	ENSG00000143314	ENSP00000411369	ENSMUSG00000019710	Mrpl24
RNASEK	ribonuclease, RNase K [Source:HGNC Symbol;Acc:33911]	ENSG00000219200	ENSP00000385440	ENSMUSG00000040904	Gm21988
PELO	pelota homolog (Drosophila) [Source:HGNC Symbol;Acc:8829]	ENSG00000152684	ENSP00000274311	ENSMUSG00000042275	Pelo
QARS	glutaminyl-tRNA synthetase [Source:HGNC Symbol;Acc:9751]	ENSG00000172053	ENSP00000307567	ENSMUSG00000032604	Qars
IPO4	importin 4 [Source:HGNC Symbol;Acc:19426]	ENSG00000196497	ENSP00000346453	ENSMUSG00000002319	Ipo4
CAPRIN1	cell cycle associated protein 1 [Source:HGNC Symbol;Acc:6743]	ENSG00000135387	ENSP00000374296	ENSMUSG00000027184	Caprin1
CAPRIN2	caprin family member 2 [Source:HGNC Symbol;Acc:21259]	ENSG00000110888	ENSP00000251071	ENSMUSG00000030309	Caprin2
PNLDC1	poly(A)-specific ribonuclease (PARN)-like domain containing 1 [Source:HGNC Symbol;Acc:21185]	ENSG00000146453	ENSP00000275275	ENSMUSG00000073460	Pnldc1
PARN	poly(A)-specific ribonuclease [Source:HGNC Symbol;Acc:8609]	ENSG00000140694	ENSP00000444381	ENSMUSG00000022685	Parn
TIAL1	TIA1 cytotoxic granule-associated RNA binding protein-like 1 [Source:HGNC Symbol;Acc:11804]	ENSG00000151923	ENSP00000394902	ENSMUSG00000030846	Tial1
TIA1	TIA1 cytotoxic granule-associated RNA binding protein [Source:HGNC Symbol;Acc:11802]	ENSG00000116001	ENSP00000282574	ENSMUSG00000071337	Tia1
CDC40	cell division cycle 40 homolog (S. cerevisiae) [Source:HGNC Symbol;Acc:17350]	ENSG00000168438	ENSP00000357928	ENSMUSG00000038446	Cdc40
ZNF598	zinc finger protein 598 [Source:HGNC Symbol;Acc:28079]	ENSG00000167962	ENSP00000455882	ENSMUSG00000041130	Zfp598
RCL1	RNA terminal phosphate cyclase-like 1 [Source:HGNC Symbol;Acc:17687]	ENSG00000120158	ENSP00000412000	ENSMUSG00000024785	Rcl1
RTCA	RNA 3'-terminal phosphate cyclase [Source:HGNC Symbol;Acc:17981]	ENSG00000137996	ENSP00000359146	ENSMUSG00000000339	Rtca
MRPL38	mitochondrial ribosomal protein L38 [Source:HGNC Symbol;Acc:14033]	ENSG00000204316	ENSP00000308275	ENSMUSG00000020775	Mrpl38
ADAT2	adenosine deaminase, tRNA-specific 2 [Source:HGNC Symbol;Acc:21172]	ENSG00000189007	ENSP00000237283	ENSMUSG00000019808	Adat2
BOP1	block of proliferation 1 [Source:HGNC Symbol;Acc:15519]	ENSG00000261236	ENSP00000455106	ENSMUSG00000022557	Bop1
U2SURP	U2 snRNP-associated SURP domain containing [Source:HGNC Symbol;Acc:30855]	ENSG00000163714	ENSP00000422011	ENSMUSG00000032407	U2surp
DUS3L	dihydrouridine synthase 3-like (S. cerevisiae) [Source:HGNC Symbol;Acc:26920]	ENSG00000141994	ENSP00000311977	ENSMUSG00000007603	Dus3l
CSTF3	cleavage stimulation factor, 3' pre-RNA, subunit 3, 77kDa [Source:HGNC Symbol;Acc:2485]	ENSG00000176102	ENSP00000315791	ENSMUSG00000027176	Cstf3
SRSF11	serine/arginine-rich splicing factor 11 [Source:HGNC Symbol;Acc:10782]	ENSG00000116754	ENSP00000378568	ENSMUSG00000055436	Srsf11
SREK1	splicing regulatory glutamine/lysine-rich protein 1 [Source:HGNC Symbol;Acc:17882]	ENSG00000153914	ENSP00000334538	ENSMUSG00000032621	Srek1
POLR1E	polymerase (RNA) I polypeptide E, 53kDa [Source:HGNC Symbol;Acc:17631]	ENSG00000137054	ENSP00000367029	ENSMUSG00000028318	Polr1e
EXOSC7	exosome component 7 [Source:HGNC Symbol;Acc:28112]	ENSG00000075914	ENSP00000265564	ENSMUSG00000025785	Exosc7
EXOSC8	exosome component 8 [Source:HGNC Symbol;Acc:17035]	ENSG00000120699	ENSP00000374354	ENSMUSG00000027752	Exosc8
EXOSC9	exosome component 9 [Source:HGNC Symbol;Acc:9137]	ENSG00000123737	ENSP00000243498	ENSMUSG00000027714	Exosc9
MRPL12	mitochondrial ribosomal protein L12 [Source:HGNC Symbol;Acc:10378]	ENSG00000262814	ENSP00000333837	ENSMUSG00000039640	Mrpl12
RPS28	ribosomal protein S28 [Source:HGNC Symbol;Acc:10418]	ENSG00000233927	ENSP00000472469	ENSMUSG00000067288	Rps28
TEFM	transcription elongation factor, mitochondrial [Source:HGNC Symbol;Acc:26223]	ENSG00000172171	ENSP00000462963	ENSMUSG00000046909	Tefm
RPL12	ribosomal protein L12 [Source:HGNC Symbol;Acc:10302]	ENSG00000197958	ENSP00000354739	ENSMUSG00000038900	Rpl12
ZC3H3	zinc finger CCCH-type containing 3 [Source:HGNC Symbol;Acc:28972]	ENSG00000014164	ENSP00000262577	ENSMUSG00000075600	Zc3h3
EIF6	eukaryotic translation initiation factor 6 [Source:HGNC Symbol;Acc:6159]	ENSG00000242372	ENSP00000363574	ENSMUSG00000027613	Eif6
NELFE	negative elongation factor complex member E [Source:HGNC Symbol;Acc:13974]	ENSG00000206268	ENSP00000407528	ENSMUSG00000024369	Nelfe
EIF2B3	eukaryotic translation initiation factor 2B, subunit 3 gamma, 58kDa [Source:HGNC Symbol;Acc:3259] [Type: protein coding Ensembl/Havana merge]	ENSG00000070785	ENSP00000353575	ENSMUSG00000028683	Eif2b3
APOBEC2	apolipoprotein B mRNA editing enzyme, catalytic polypeptide-like 2 [Source:HGNC Symbol;Acc:605]	ENSG00000124701	ENSP00000244669	ENSMUSG00000040694	Apobec2
APOBEC3H	apolipoprotein B mRNA editing enzyme, catalytic polypeptide-like 3H [Source:HGNC Symbol;Acc:24100]	ENSG00000100298	ENSP00000216123	ENSMUSG00000009585	Apobec3
APOBEC3F	apolipoprotein B mRNA editing enzyme, catalytic polypeptide-like 3F [Source:HGNC Symbol;Acc:17356]	ENSG00000128394	ENSP00000309749	#N/A	#N/A
APOBEC3G	apolipoprotein B mRNA editing enzyme, catalytic polypeptide-like 3G [Source:HGNC Symbol;Acc:17357]	ENSG00000239713	ENSP00000385057	#N/A	#N/A
APOBEC1	apolipoprotein B mRNA editing enzyme, catalytic polypeptide 1 [Source:HGNC Symbol;Acc:604]	ENSG00000111701	ENSP00000229304	ENSMUSG00000040613	Apobec1
ZC3H7A	zinc finger CCCH-type containing 7A [Source:HGNC Symbol;Acc:30959]	ENSG00000122299	ENSP00000347999	ENSMUSG00000037965	Zc3h7a
ZC3H7B	zinc finger CCCH-type containing 7B [Source:HGNC Symbol;Acc:30869]	ENSG00000100403	ENSP00000263243	ENSMUSG00000022390	Zc3h7b
NOP9	NOP9 nucleolar protein homolog (yeast) [Source:HGNC Symbol;Acc:19826]	ENSG00000196943	ENSP00000267425	ENSMUSG00000019297	Nop9
PQBP1	polyglutamine binding protein 1 [Source:HGNC Symbol;Acc:9330]	ENSG00000102103	ENSP00000218224	ENSMUSG00000031157	Pqbp1
PATL2	protein associated with topoisomerase II homolog 2 (yeast) [Source:HGNC Symbol;Acc:33630]	ENSG00000229474	ENSP00000416673	ENSMUSG00000027233	Patl2
PATL1	protein associated with topoisomerase II homolog 1 (yeast) [Source:HGNC Symbol;Acc:26721]	ENSG00000166889	ENSP00000300146	ENSMUSG00000046139	Patl1
EDC3	enhancer of mRNA decapping 3 homolog (S. cerevisiae) [Source:HGNC Symbol;Acc:26114]	ENSG00000179151	ENSP00000455580	ENSMUSG00000038957	Edc3
WBP4	WW domain binding protein 4 [Source:HGNC Symbol;Acc:12739]	ENSG00000120688	ENSP00000439301	ENSMUSG00000022023	Wbp4
GLTSCR2	glioma tumor suppressor candidate region gene 2 [Source:HGNC Symbol;Acc:4333]	ENSG00000105373	ENSP00000470263	ENSMUSG00000041560	Nop53
RPS18	ribosomal protein S18 [Source:HGNC Symbol;Acc:10401]	ENSG00000226225	ENSP00000403175	ENSMUSG00000008668	Rps18
ASCC1	activating signal cointegrator 1 complex subunit 1 [Source:HGNC Symbol;Acc:24268]	ENSG00000138303	ENSP00000378373	ENSMUSG00000044475	Ascc1
EIF5A	eukaryotic translation initiation factor 5A [Source:HGNC Symbol;Acc:3300]	ENSG00000132507	ENSP00000460284	ENSMUSG00000078812	Eif5a
EIF5A2	eukaryotic translation initiation factor 5A2 [Source:HGNC Symbol;Acc:3301]	ENSG00000163577	ENSP00000417133	ENSMUSG00000050192	Eif5a2
EIF5AL1	eukaryotic translation initiation factor 5A-like 1 [Source:HGNC Symbol;Acc:17419]	ENSG00000253626	ENSP00000430706	ENSMUSG00000078812	Eif5a
MRPL47	mitochondrial ribosomal protein L47 [Source:HGNC Symbol;Acc:16652]	ENSG00000136522	ENSP00000376427	ENSMUSG00000037531	Mrpl47
BOLL	bol, boule-like (Drosophila) [Source:HGNC Symbol;Acc:14273]	ENSG00000152430	ENSP00000397711	ENSMUSG00000025977	Boll
DAZL	deleted in azoospermia-like [Source:HGNC Symbol;Acc:2685]	ENSG00000092345	ENSP00000398109	ENSMUSG00000010592	Dazl
DAZ1	deleted in azoospermia 1 [Source:HGNC Symbol;Acc:2682]	ENSG00000188120	ENSP00000371950	ENSMUSG00000010592	Dazl
DAZ2	deleted in azoospermia 2 [Source:HGNC Symbol;Acc:15964]	ENSG00000205944	ENSP00000371871	ENSMUSG00000010592	Dazl
DAZ3	deleted in azoospermia 3 [Source:HGNC Symbol;Acc:15965]	ENSG00000187191	ENSP00000401049	ENSMUSG00000010592	Dazl
DAZ4	deleted in azoospermia 4 [Source:HGNC Symbol;Acc:15966]	ENSG00000205916	ENSP00000401363	ENSMUSG00000010592	Dazl
INTS1	integrator complex subunit 1 [Source:HGNC Symbol;Acc:24555]	ENSG00000164880	ENSP00000385722	ENSMUSG00000029547	Ints1
RPLP1	ribosomal protein, large, P1 [Source:HGNC Symbol;Acc:10372]	ENSG00000137818	ENSP00000346037	ENSMUSG00000007892	Rplp1
MRPS11	mitochondrial ribosomal protein S11 [Source:HGNC Symbol;Acc:14050]	ENSG00000181991	ENSP00000317376	ENSMUSG00000030611	Mrps11
WDR43	WD repeat domain 43 [Source:HGNC Symbol;Acc:28945]	ENSG00000163811	ENSP00000384302	ENSMUSG00000041057	Wdr43
TRMT112	tRNA methyltransferase 11-2 homolog (S. cerevisiae) [Source:HGNC Symbol;Acc:26940]	ENSG00000173113	ENSP00000309433	ENSMUSG00000038812	Trmt112
PPP1R8	protein phosphatase 1, regulatory subunit 8 [Source:HGNC Symbol;Acc:9296]	ENSG00000117751	ENSP00000311677	ENSMUSG00000028882	Ppp1r8
FBXO17	F-box protein 17 [Source:HGNC Symbol;Acc:18754]	ENSG00000104835	ENSP00000292852	ENSMUSG00000070699	Sars2
MTHFSD	methenyltetrahydrofolate synthetase domain containing [Source:HGNC Symbol;Acc:25778]	ENSG00000103248	ENSP00000370612	ENSMUSG00000031816	Mthfsd
SON	SON DNA binding protein [Source:HGNC Symbol;Acc:11183]	ENSG00000159140	ENSP00000348984	ENSMUSG00000022961	Son
SPATS2L	spermatogenesis associated, serine-rich 2-like [Source:HGNC Symbol;Acc:24574]	ENSG00000196141	ENSP00000405751	ENSMUSG00000038305	Spats2l
SPATS2	spermatogenesis associated, serine-rich 2 [Source:HGNC Symbol;Acc:18650]	ENSG00000123352	ENSP00000326841	ENSMUSG00000051934	Spats2
MAEL	maelstrom spermatogenic transposon silencer [Source:HGNC Symbol;Acc:25929]	ENSG00000143194	ENSP00000356846	ENSMUSG00000040629	Mael
RRP1B	ribosomal RNA processing 1 homolog B (S. cerevisiae) [Source:HGNC Symbol;Acc:23818]	ENSG00000160208	ENSP00000339145	ENSMUSG00000058392	Rrp1b
RRP1	ribosomal RNA processing 1 homolog (S. cerevisiae) [Source:HGNC Symbol;Acc:18785]	ENSG00000160214	ENSP00000417464	ENSMUSG00000061032	Rrp1
ZC3HAV1	zinc finger CCCH-type, antiviral 1 [Source:HGNC Symbol;Acc:23721]	ENSG00000105939	ENSP00000418385	ENSMUSG00000029826	Zc3hav1
PARP12	poly (ADP-ribose) polymerase family, member 12 [Source:HGNC Symbol;Acc:21919]	ENSG00000059378	ENSP00000263549	ENSMUSG00000038507	Parp12
TIPARP	TCDD-inducible poly(ADP-ribose) polymerase [Source:HGNC Symbol;Acc:23696]	ENSG00000163659	ENSP00000420141	ENSMUSG00000034640	Tiparp
MRPS17	mitochondrial ribosomal protein S17 [Source:HGNC Symbol;Acc:14047]	ENSG00000239789	ENSP00000401349	ENSMUSG00000034211	Mrps17
U2AF2	U2 small nuclear RNA auxiliary factor 2 [Source:HGNC Symbol;Acc:23156]	ENSG00000063244	ENSP00000307863	ENSMUSG00000030435	U2af2
UHMK1	U2AF homology motif (UHM) kinase 1 [Source:HGNC Symbol;Acc:19683]	ENSG00000152332	ENSP00000420270	ENSMUSG00000026667	Uhmk1
NUP153	nucleoporin 153kDa [Source:HGNC Symbol;Acc:8062]	ENSG00000124789	ENSP00000262077	ENSMUSG00000021374	Nup153
CSDE1	cold shock domain containing E1, RNA-binding [Source:HGNC Symbol;Acc:29905]	ENSG00000009307	ENSP00000407724	ENSMUSG00000068823	Csde1
POLR2L	polymerase (RNA) II (DNA directed) polypeptide L, 7.6kDa [Source:HGNC Symbol;Acc:9199]	ENSG00000177700	ENSP00000324124	ENSMUSG00000038489	Polr2l
NKRF	NFKB repressing factor [Source:HGNC Symbol;Acc:19374]	ENSG00000186416	ENSP00000442308	ENSMUSG00000044149	Nkrf
MRPL48	mitochondrial ribosomal protein L48 [Source:HGNC Symbol;Acc:16653]	ENSG00000175581	ENSP00000399076	ENSMUSG00000030706	Mrpl48
XRCC6	X-ray repair complementing defective repair in Chinese hamster cells 6 [Source:HGNC Symbol;Acc:4055]	ENSG00000196419	ENSP00000403679	ENSMUSG00000022471	Xrcc6
SUPT5H	suppressor of Ty 5 homolog (S. cerevisiae) [Source:HGNC Symbol;Acc:11469]	ENSG00000196235	ENSP00000469090	ENSMUSG00000003435	Supt5
TSR3	TSR3, 20S rRNA accumulation, homolog (S. cerevisiae) [Source:HGNC Symbol;Acc:14175]	ENSG00000007520	ENSP00000007390	ENSMUSG00000015126	Tsr3
XRN2	5'-3' exoribonuclease 2 [Source:HGNC Symbol;Acc:12836]	ENSG00000088930	ENSP00000413548	ENSMUSG00000027433	Xrn2
RSRC1	arginine/serine-rich coiled-coil 1 [Source:HGNC Symbol;Acc:24152]	ENSG00000174891	ENSP00000295930	ENSMUSG00000034544	Rsrc1
TDRD5	tudor domain containing 5 [Source:HGNC Symbol;Acc:20614]	ENSG00000162782	ENSP00000406052	ENSMUSG00000060985	Tdrd5
POLR2J	polymerase (RNA) II (DNA directed) polypeptide J, 13.3kDa [Source:HGNC Symbol;Acc:9197]	ENSG00000005075	ENSP00000292614	ENSMUSG00000039771	Polr2j
POLR2J2	DNA-directed RNA polymerase II subunit RPB11-b1 [Source:RefSeq peptide;Acc:NP_116581]	ENSG00000228049	ENSP00000466522	#N/A	#N/A
POLR2J3	polymerase (RNA) II (DNA directed) polypeptide J3 [Source:HGNC Symbol;Acc:33853]	ENSG00000168255	ENSP00000368662	ENSMUSG00000006143	Upk3bl
SAFB2	scaffold attachment factor B2 [Source:HGNC Symbol;Acc:21605]	ENSG00000130254	ENSP00000252542	ENSMUSG00000042625	Safb2
SAFB	scaffold attachment factor B [Source:HGNC Symbol;Acc:10520]	ENSG00000160633	ENSP00000292123	ENSMUSG00000071054	Safb
SLTM	SAFB-like, transcription modulator [Source:HGNC Symbol;Acc:20709]	ENSG00000137776	ENSP00000369887	ENSMUSG00000032212	Sltm
BRIX1	BRX1, biogenesis of ribosomes, homolog (S. cerevisiae) [Source:HGNC Symbol;Acc:24170]	ENSG00000113460	ENSP00000338862	ENSMUSG00000022247	Brix1
POLR2I	polymerase (RNA) II (DNA directed) polypeptide I, 14.5kDa [Source:HGNC Symbol;Acc:9196]	ENSG00000105258	ENSP00000221859	ENSMUSG00000019738	Polr2i
PWP2	PWP2 periodic tryptophan protein homolog (yeast) [Source:HGNC Symbol;Acc:9711]	ENSG00000241945	ENSP00000291576	ENSMUSG00000032834	Pwp2
ELAC2	elaC homolog 2 (E. coli) [Source:HGNC Symbol;Acc:14198]	ENSG00000006744	ENSP00000337445	ENSMUSG00000020549	Elac2
ZCCHC14	zinc finger, CCHC domain containing 14 [Source:HGNC Symbol;Acc:24134]	ENSG00000140948	ENSP00000268616	ENSMUSG00000061410	Zcchc14
ZCCHC2	zinc finger, CCHC domain containing 2 [Source:HGNC Symbol;Acc:22916]	ENSG00000141664	ENSP00000464791	ENSMUSG00000038866	Zcchc2
LARS	leucyl-tRNA synthetase [Source:HGNC Symbol;Acc:6512]	ENSG00000133706	ENSP00000426005	ENSMUSG00000024493	Lars
MRPL28	mitochondrial ribosomal protein L28 [Source:HGNC Symbol;Acc:14484]	ENSG00000086504	ENSP00000395305	ENSMUSG00000024181	Mrpl28
CNOT1	CCR4-NOT transcription complex, subunit 1 [Source:HGNC Symbol;Acc:7877]	ENSG00000125107	ENSP00000455635	ENSMUSG00000036550	Cnot1
DDX18	DEAD (Asp-Glu-Ala-Asp) box polypeptide 18 [Source:HGNC Symbol;Acc:2741]	ENSG00000088205	ENSP00000263239	ENSMUSG00000001674	Ddx18
TSEN15	tRNA splicing endonuclease 15 homolog (S. cerevisiae) [Source:HGNC Symbol;Acc:16791]	ENSG00000198860	ENSP00000402002	ENSMUSG00000014980	Tsen15
USP10	ubiquitin specific peptidase 10 [Source:HGNC Symbol;Acc:12608]	ENSG00000103194	ENSP00000219473	ENSMUSG00000031826	Usp10
SMNDC1	survival motor neuron domain containing 1 [Source:HGNC Symbol;Acc:16900]	ENSG00000119953	ENSP00000358605	ENSMUSG00000025024	Smndc1
THUMPD2	THUMP domain containing 2 [Source:HGNC Symbol;Acc:14890]	ENSG00000138050	ENSP00000423933	ENSMUSG00000024246	Thumpd2
THUMPD3	THUMP domain containing 3 [Source:HGNC Symbol;Acc:24493]	ENSG00000134077	ENSP00000339532	ENSMUSG00000030264	Thumpd3
SND1	staphylococcal nuclease and tudor domain containing 1 [Source:HGNC Symbol;Acc:30646]	ENSG00000197157	ENSP00000346762	ENSMUSG00000001424	Snd1
LSM4	LSM4 homolog, U6 small nuclear RNA associated (S. cerevisiae) [Source:HGNC Symbol;Acc:17259]	ENSG00000130520	ENSP00000469468	ENSMUSG00000031848	Lsm4
EIF3M	eukaryotic translation initiation factor 3, subunit M [Source:HGNC Symbol;Acc:24460]	ENSG00000149100	ENSP00000436049	ENSMUSG00000027170	Eif3m
MRPL34	mitochondrial ribosomal protein L34 [Source:HGNC Symbol;Acc:14488]	ENSG00000130312	ENSP00000472266	ENSMUSG00000034880	Mrpl34
SRP72	signal recognition particle 72kDa [Source:HGNC Symbol;Acc:11303]	ENSG00000174780	ENSP00000342181	ENSMUSG00000036323	Srp72
SUGP1	SURP and G patch domain containing 1 [Source:HGNC Symbol;Acc:18643]	ENSG00000105705	ENSP00000247001	ENSMUSG00000011306	Sugp1
SUGP2	SURP and G patch domain containing 2 [Source:HGNC Symbol;Acc:18641]	ENSG00000064607	ENSP00000409603	ENSMUSG00000036054	Sugp2
RPS3	ribosomal protein S3 [Source:HGNC Symbol;Acc:10420]	ENSG00000149273	ENSP00000433421	ENSMUSG00000030744	Rps3
RPS27A	ribosomal protein S27a [Source:HGNC Symbol;Acc:10417]	ENSG00000143947	ENSP00000272317	ENSMUSG00000020460	Rps27a
CCAR2	KIAA1967 [Source:HGNC Symbol;Acc:23360]	ENSG00000158941	ENSP00000373930	ENSMUSG00000033712	Ccar2
CCAR1	cell division cycle and apoptosis regulator 1 [Source:HGNC Symbol;Acc:24236]	ENSG00000060339	ENSP00000439252	ENSMUSG00000020074	Ccar1
DDX49	DEAD (Asp-Glu-Ala-Asp) box polypeptide 49 [Source:HGNC Symbol;Acc:18684]	ENSG00000105671	ENSP00000395377	ENSMUSG00000057788	Ddx49
MRPL4	mitochondrial ribosomal protein L4 [Source:HGNC Symbol;Acc:14276]	ENSG00000105364	ENSP00000377334	ENSMUSG00000003299	Mrpl4
SFSWAP	splicing factor, suppressor of white-apricot homolog (Drosophila) [Source:HGNC Symbol;Acc:10790]	ENSG00000061936	ENSP00000437738	ENSMUSG00000029439	Sfswap
MRPS12	mitochondrial ribosomal protein S12 [Source:HGNC Symbol;Acc:10380]	ENSG00000128626	ENSP00000384952	ENSMUSG00000045948	Mrps12
EIF1	eukaryotic translation initiation factor 1 [Source:HGNC Symbol;Acc:3249]	ENSG00000173812	ENSP00000467918	ENSMUSG00000035530	Eif1
EIF1B	eukaryotic translation initiation factor 1B [Source:HGNC Symbol;Acc:30792]	ENSG00000114784	ENSP00000232905	ENSMUSG00000006941	Eif1b
CLP1	cleavage and polyadenylation factor I subunit 1 [Source:HGNC Symbol;Acc:16999]	ENSG00000172409	ENSP00000434995	ENSMUSG00000027079	Clp1
ZMAT5	zinc finger, matrin-type 5 [Source:HGNC Symbol;Acc:28046]	ENSG00000100319	ENSP00000344241	ENSMUSG00000009076	Zmat5
SF3B3	splicing factor 3b, subunit 3, 130kDa [Source:HGNC Symbol;Acc:10770]	ENSG00000189091	ENSP00000305790	ENSMUSG00000033732	Sf3b3
PLD6	phospholipase D family, member 6 [Source:HGNC Symbol;Acc:30447]	ENSG00000179598	ENSP00000317177	ENSMUSG00000043648	Pld6
QTRTD1	queuine tRNA-ribosyltransferase domain containing 1 [Source:HGNC Symbol;Acc:25771]	ENSG00000151576	ENSP00000281273	ENSMUSG00000022704	Qtrt2
QTRT1	queuine tRNA-ribosyltransferase 1 [Source:HGNC Symbol;Acc:23797]	ENSG00000213339	ENSP00000465974	ENSMUSG00000002825	Qtrt1
PIH1D1	PIH1 domain containing 1 [Source:HGNC Symbol;Acc:26075]	ENSG00000104872	ENSP00000469087	ENSMUSG00000003423	Pih1d1
SWT1	SWT1 RNA endoribonuclease homolog (S. cerevisiae) [Source:HGNC Symbol;Acc:16785]	ENSG00000116668	ENSP00000356471	ENSMUSG00000052748	Swt1
EXOSC4	exosome component 4 [Source:HGNC Symbol;Acc:18189]	ENSG00000178896	ENSP00000315476	ENSMUSG00000034259	Exosc4
EXOSC6	exosome component 6 [Source:HGNC Symbol;Acc:19055]	ENSG00000223496	ENSP00000398597	ENSMUSG00000109941	Exosc6
PTRH1	peptidyl-tRNA hydrolase 1 homolog (S. cerevisiae) [Source:HGNC Symbol;Acc:27039]	ENSG00000187024	ENSP00000439469	ENSMUSG00000053746	Ptrh1
INTS8	integrator complex subunit 8 [Source:HGNC Symbol;Acc:26048]	ENSG00000164941	ENSP00000430338	ENSMUSG00000040738	Ints8
EXOSC10	exosome component 10 [Source:HGNC Symbol;Acc:9138]	ENSG00000171824	ENSP00000307307	ENSMUSG00000017264	Exosc10
CASC3	cancer susceptibility candidate 3 [Source:HGNC Symbol;Acc:17040]	ENSG00000108349	ENSP00000264645	ENSMUSG00000078676	Casc3
GTF3A	general transcription factor IIIA [Source:HGNC Symbol;Acc:4662]	ENSG00000122034	ENSP00000370532	ENSMUSG00000016503	Gtf3a
MRPL54	mitochondrial ribosomal protein L54 [Source:HGNC Symbol;Acc:16685]	ENSG00000183617	ENSP00000331849	ENSMUSG00000034932	Mrpl54
GTPBP3	GTP binding protein 3 (mitochondrial) [Source:HGNC Symbol;Acc:14880]	ENSG00000130299	ENSP00000313818	ENSMUSG00000007610	Gtpbp3
UBA1	ubiquitin-like modifier activating enzyme 1 [Source:HGNC Symbol;Acc:12469]	ENSG00000130985	ENSP00000366568	ENSMUSG00000001924	Uba1
LSM12	LSM12 homolog (S. cerevisiae) [Source:HGNC Symbol;Acc:26407]	ENSG00000161654	ENSP00000293406	ENSMUSG00000020922	Lsm12
HINT3	histidine triad nucleotide binding protein 3 [Source:HGNC Symbol;Acc:18468]	ENSG00000111911	ENSP00000229633	ENSMUSG00000019791	Hint3
CCDC59	coiled-coil domain containing 59 [Source:HGNC Symbol;Acc:25005]	ENSG00000133773	ENSP00000256151	ENSMUSG00000019897	Ccdc59
POLDIP3	polymerase (DNA-directed), delta interacting protein 3 [Source:HGNC Symbol;Acc:23782]	ENSG00000100227	ENSP00000252116	ENSMUSG00000041815	Poldip3
RPL32	ribosomal protein L32 [Source:HGNC Symbol;Acc:10336]	ENSG00000144713	ENSP00000339064	ENSMUSG00000057841	Rpl32
AZGP1	alpha-2-glycoprotein 1, zinc-binding [Source:HGNC Symbol;Acc:910]	ENSG00000160862	ENSP00000292401	ENSMUSG00000037053	Azgp1
EMG1	Ribosomal RNA small subunit methyltransferase NEP1 [Source:UniProtKB/Swiss-Prot;Acc:Q92979]	ENSG00000268439	ENSP00000470560	ENSMUSG00000004268	Emg1
C17orf85	chromosome 17 open reading frame 85 [Source:HGNC Symbol;Acc:24612]	ENSG00000074356	ENSP00000373657	ENSMUSG00000020783	Ncbp3
N4BP1	NEDD4 binding protein 1 [Source:HGNC Symbol;Acc:29850]	ENSG00000102921	ENSP00000262384	ENSMUSG00000031652	N4bp1
NYNRIN	NYN domain and retroviral integrase containing [Source:HGNC Symbol;Acc:20165]	ENSG00000205978	ENSP00000371994	ENSMUSG00000075592	Nynrin
KHNYN	KH and NYN domain containing [Source:HGNC Symbol;Acc:20166]	ENSG00000100441	ENSP00000450799	ENSMUSG00000047153	Khnyn
NOP2	NOP2 nucleolar protein [Source:HGNC Symbol;Acc:7867]	ENSG00000111641	ENSP00000371858	ENSMUSG00000038279	Nop2
NSUN4	NOP2/Sun domain family, member 4 [Source:HGNC Symbol;Acc:31802]	ENSG00000117481	ENSP00000437758	ENSMUSG00000028706	Nsun4
NSUN3	NOP2/Sun domain family, member 3 [Source:HGNC Symbol;Acc:26208]	ENSG00000178694	ENSP00000318986	ENSMUSG00000050312	Nsun3
NSUN6	NOP2/Sun domain family, member 6 [Source:HGNC Symbol;Acc:23529]	ENSG00000241058	ENSP00000366519	ENSMUSG00000026707	Nsun6
PAN2	PAN2 poly(A) specific ribonuclease subunit homolog (S. cerevisiae) [Source:HGNC Symbol;Acc:20074]	ENSG00000135473	ENSP00000257931	ENSMUSG00000005682	Pan2
ZCCHC9	zinc finger, CCHC domain containing 9 [Source:HGNC Symbol;Acc:25424]	ENSG00000131732	ENSP00000369546	ENSMUSG00000021621	Zcchc9
RRP9	ribosomal RNA processing 9, small subunit (SSU) processome component, homolog (yeast) [Source:HGNC Symbol;Acc:16829]	ENSG00000114767	ENSP00000232888	ENSMUSG00000041506	Rrp9
TNRC6A	trinucleotide repeat containing 6A [Source:HGNC Symbol;Acc:11969]	ENSG00000090905	ENSP00000326900	ENSMUSG00000052707	Tnrc6a
TNRC6B	trinucleotide repeat containing 6B [Source:HGNC Symbol;Acc:29190]	ENSG00000100354	ENSP00000384795	ENSMUSG00000047888	Tnrc6b
TNRC6C	trinucleotide repeat containing 6C [Source:HGNC Symbol;Acc:29318]	ENSG00000078687	ENSP00000440310	ENSMUSG00000025571	Tnrc6c
RP9	retinitis pigmentosa 9 (autosomal dominant) [Source:HGNC Symbol;Acc:10288]	ENSG00000164610	ENSP00000297157	ENSMUSG00000032239	Rp9
MRPL15	mitochondrial ribosomal protein L15 [Source:HGNC Symbol;Acc:14054]	ENSG00000137547	ENSP00000428581	ENSMUSG00000033845	Mrpl15
NGDN	neuroguidin, EIF4E binding protein [Source:HGNC Symbol;Acc:20271]	ENSG00000129460	ENSP00000380340	ENSMUSG00000022204	Ngdn
LSM10	LSM10, U7 small nuclear RNA associated [Source:HGNC Symbol;Acc:17562]	ENSG00000181817	ENSP00000319341	ENSMUSG00000050188	Lsm10
PUS1	pseudouridylate synthase 1 [Source:HGNC Symbol;Acc:15508]	ENSG00000177192	ENSP00000400032	ENSMUSG00000029507	Pus1
MAK16	MAK16 homolog (S. cerevisiae) [Source:HGNC Symbol;Acc:13703]	ENSG00000198042	ENSP00000353246	ENSMUSG00000031578	Mak16
RPS13	ribosomal protein S13 [Source:HGNC Symbol;Acc:10386]	ENSG00000110700	ENSP00000435777	ENSMUSG00000090862	Rps13
SNRNP200	small nuclear ribonucleoprotein 200kDa (U5) [Source:HGNC Symbol;Acc:30859]	ENSG00000144028	ENSP00000317123	ENSMUSG00000003660	Snrnp200
PRDX1	peroxiredoxin 1 [Source:HGNC Symbol;Acc:9352]	ENSG00000117450	ENSP00000262746	ENSMUSG00000028691	Prdx1
TSN	translin [Source:HGNC Symbol;Acc:12379]	ENSG00000211460	ENSP00000399735	ENSMUSG00000026374	Tsn
NUFIP2	nuclear fragile X mental retardation protein interacting protein 2 [Source:HGNC Symbol;Acc:17634]	ENSG00000108256	ENSP00000225388	ENSMUSG00000037857	Nufip2
RBM19	RNA binding motif protein 19 [Source:HGNC Symbol;Acc:29098]	ENSG00000122965	ENSP00000442053	ENSMUSG00000029594	Rbm19
TDRKH	tudor and KH domain containing [Source:HGNC Symbol;Acc:11713]	ENSG00000182134	ENSP00000357812	ENSMUSG00000041912	Tdrkh
NOP58	NOP58 ribonucleoprotein [Source:HGNC Symbol;Acc:29926]	ENSG00000055044	ENSP00000264279	ENSMUSG00000026020	Nop58
RBM6	RNA binding motif protein 6 [Source:HGNC Symbol;Acc:9903]	ENSG00000004534	ENSP00000266022	ENSMUSG00000032582	Rbm6
RBM10	RNA binding motif protein 10 [Source:HGNC Symbol;Acc:9896]	ENSG00000182872	ENSP00000328848	ENSMUSG00000031060	Rbm10
RBM5	RNA binding motif protein 5 [Source:HGNC Symbol;Acc:9902]	ENSG00000003756	ENSP00000343054	ENSMUSG00000032580	Rbm5
RBM44	RNA binding motif protein 44 [Source:HGNC Symbol;Acc:24756]	ENSG00000177483	ENSP00000321179	ENSMUSG00000070732	Rbm44
OASL	2'-5'-oligoadenylate synthetase-like [Source:HGNC Symbol;Acc:8090]	ENSG00000135114	ENSP00000257570	ENSMUSG00000041827	Oasl1
OAS1	2'-5'-oligoadenylate synthetase 1, 40/46kDa [Source:HGNC Symbol;Acc:8086]	ENSG00000089127	ENSP00000448790	ENSMUSG00000001166	Oas1c
OAS2	2'-5'-oligoadenylate synthetase 2, 69/71kDa [Source:HGNC Symbol;Acc:8087]	ENSG00000111335	ENSP00000376362	ENSMUSG00000032690	Oas2
OAS3	2'-5'-oligoadenylate synthetase 3, 100kDa [Source:HGNC Symbol;Acc:8088]	ENSG00000111331	ENSP00000228928	ENSMUSG00000032661	Oas3
SF3A3	splicing factor 3a, subunit 3, 60kDa [Source:HGNC Symbol;Acc:10767]	ENSG00000183431	ENSP00000362110	ENSMUSG00000028902	Sf3a3
NOC3L	nucleolar complex associated 3 homolog (S. cerevisiae) [Source:HGNC Symbol;Acc:24034]	ENSG00000173145	ENSP00000360401	ENSMUSG00000024999	Noc3l
MYEF2	myelin expression factor 2 [Source:HGNC Symbol;Acc:17940]	ENSG00000104177	ENSP00000267836	ENSMUSG00000027201	Myef2
HNRNPM	heterogeneous nuclear ribonucleoprotein M [Source:HGNC Symbol;Acc:5046]	ENSG00000099783	ENSP00000325376	ENSMUSG00000059208	Hnrnpm
C11orf68	chromosome 11 open reading frame 68 [Source:HGNC Symbol;Acc:28801]	ENSG00000175573	ENSP00000398350	ENSMUSG00000047423	AI837181
MRPL10	mitochondrial ribosomal protein L10 [Source:HGNC Symbol;Acc:14055]	ENSG00000159111	ENSP00000324100	ENSMUSG00000001445	Mrpl10
RNASE10	ribonuclease, RNase A family, 10 (non-active) [Source:HGNC Symbol;Acc:19275]	ENSG00000182545	ENSP00000392996	ENSMUSG00000021872	Rnase10
CALR	calreticulin [Source:HGNC Symbol;Acc:1455]	ENSG00000179218	ENSP00000465105	ENSMUSG00000003814	Calr
CANX	calnexin [Source:HGNC Symbol;Acc:1473]	ENSG00000127022	ENSP00000391646	ENSMUSG00000020368	Canx
CALR3	calreticulin 3 [Source:HGNC Symbol;Acc:20407]	ENSG00000269058	ENSP00000269881	ENSMUSG00000019732	Calr3
RPP14	ribonuclease P/MRP 14kDa subunit [Source:HGNC Symbol;Acc:30327]	ENSG00000163684	ENSP00000412894	ENSMUSG00000023156	Rpp14
RPS8	ribosomal protein S8 [Source:HGNC Symbol;Acc:10441]	ENSG00000142937	ENSP00000379888	ENSMUSG00000047675	Rps8
PDCD7	programmed cell death 7 [Source:HGNC Symbol;Acc:8767]	ENSG00000090470	ENSP00000204549	ENSMUSG00000041837	Pdcd7
RPS19BP1	ribosomal protein S19 binding protein 1 [Source:HGNC Symbol;Acc:28749]	ENSG00000187051	ENSP00000333948	ENSMUSG00000051518	Rps19bp1
TRMT6	tRNA methyltransferase 6 homolog (S. cerevisiae) [Source:HGNC Symbol;Acc:20900]	ENSG00000089195	ENSP00000203001	ENSMUSG00000037376	Trmt6
RPL4	ribosomal protein L4 [Source:HGNC Symbol;Acc:10353]	ENSG00000174444	ENSP00000454281	ENSMUSG00000032399	Rpl4
PRPF3	PRP3 pre-mRNA processing factor 3 homolog (S. cerevisiae) [Source:HGNC Symbol;Acc:17348]	ENSG00000265228	ENSP00000463374	ENSMUSG00000015748	Prpf3
RARS	arginyl-tRNA synthetase [Source:HGNC Symbol;Acc:9870]	ENSG00000113643	ENSP00000231572	ENSMUSG00000018848	Rars
RARS2	arginyl-tRNA synthetase 2, mitochondrial [Source:HGNC Symbol;Acc:21406]	ENSG00000146282	ENSP00000389656	ENSMUSG00000028292	Rars2
APOBEC4	apolipoprotein B mRNA editing enzyme, catalytic polypeptide-like 4 (putative) [Source:HGNC Symbol;Acc:32152]	ENSG00000173627	ENSP00000310622	ENSMUSG00000055547	Apobec4
ZCCHC24	zinc finger, CCHC domain containing 24 [Source:HGNC Symbol;Acc:26911]	ENSG00000165424	ENSP00000361411	ENSMUSG00000055538	Zcchc24
RPS21	ribosomal protein S21 [Source:HGNC Symbol;Acc:10409]	ENSG00000171858	ENSP00000388332	ENSMUSG00000039001	Rps21
DDX24	DEAD (Asp-Glu-Ala-Asp) box polypeptide 24 [Source:HGNC Symbol;Acc:13266]	ENSG00000089737	ENSP00000452145	ENSMUSG00000041645	Ddx24
RTCB	chromosome 22 open reading frame 28 [Source:HGNC Symbol;Acc:26935]	ENSG00000100220	ENSP00000216038	ENSMUSG00000001783	Rtcb
MBNL2	muscleblind-like splicing regulator 2 [Source:HGNC Symbol;Acc:16746]	ENSG00000139793	ENSP00000267287	ENSMUSG00000022139	Mbnl2
MBNL3	muscleblind-like splicing regulator 3 [Source:HGNC Symbol;Acc:20564]	ENSG00000076770	ENSP00000359890	ENSMUSG00000036109	Mbnl3
MBNL1	muscleblind-like splicing regulator 1 [Source:HGNC Symbol;Acc:6923]	ENSG00000152601	ENSP00000420327	ENSMUSG00000027763	Mbnl1
ALYREF	Aly/REF export factor [Source:HGNC Symbol;Acc:19071]	ENSG00000183684	ENSP00000421592	ENSMUSG00000112856	Gm4305
LSMD1	LSM domain containing 1 [Source:HGNC Symbol;Acc:28212]	ENSG00000183011	ENSP00000335611	ENSMUSG00000059278	Naa38
PUS7	pseudouridylate synthase 7 homolog (S. cerevisiae) [Source:HGNC Symbol;Acc:26033]	ENSG00000091127	ENSP00000417718	ENSMUSG00000057541	Pus7
PUS7L	pseudouridylate synthase 7 homolog (S. cerevisiae)-like [Source:HGNC Symbol;Acc:25276]	ENSG00000129317	ENSP00000446865	ENSMUSG00000033356	Pus7l
MRPS24	mitochondrial ribosomal protein S24 [Source:HGNC Symbol;Acc:14510]	ENSG00000062582	ENSP00000318158	ENSMUSG00000020477	Mrps24
RBBP6	retinoblastoma binding protein 6 [Source:HGNC Symbol;Acc:9889]	ENSG00000122257	ENSP00000317872	ENSMUSG00000030779	Rbbp6
RPL19	ribosomal protein L19 [Source:HGNC Symbol;Acc:10312]	ENSG00000108298	ENSP00000225430	ENSMUSG00000017404	Rpl19
NOL3	nucleolar protein 3 (apoptosis repressor with CARD domain) [Source:HGNC Symbol;Acc:7869]	ENSG00000140939	ENSP00000399831	ENSMUSG00000014776	Nol3
RPS27	ribosomal protein S27 [Source:HGNC Symbol;Acc:10416]	ENSG00000177954	ENSP00000357555	ENSMUSG00000090733	Rps27
RPS27L	ribosomal protein S27-like [Source:HGNC Symbol;Acc:18476]	ENSG00000185088	ENSP00000412026	ENSMUSG00000036781	Rps27l
PTRF	polymerase I and transcript release factor [Source:HGNC Symbol;Acc:9688]	ENSG00000177469	ENSP00000349541	ENSMUSG00000004044	Cavin1
MRPS18A	mitochondrial ribosomal protein S18A [Source:HGNC Symbol;Acc:14515]	ENSG00000096080	ENSP00000361188	ENSMUSG00000023967	Mrps18a
SLBP	stem-loop binding protein [Source:HGNC Symbol;Acc:10904]	ENSG00000163950	ENSP00000316490	ENSMUSG00000004642	Slbp
EARS2	glutamyl-tRNA synthetase 2, mitochondrial [Source:HGNC Symbol;Acc:29419]	ENSG00000103356	ENSP00000456467	ENSMUSG00000030871	Ears2
SMAD1	SMAD family member 1 [Source:HGNC Symbol;Acc:6767]	ENSG00000170365	ENSP00000426568	ENSMUSG00000031681	Smad1
SMAD2	SMAD family member 2 [Source:HGNC Symbol;Acc:6768]	ENSG00000175387	ENSP00000384449	ENSMUSG00000024563	Smad2
SMAD5	SMAD family member 5 [Source:HGNC Symbol;Acc:6771]	ENSG00000113658	ENSP00000441954	ENSMUSG00000021540	Smad5
SMAD9	SMAD family member 9 [Source:HGNC Symbol;Acc:6774]	ENSG00000120693	ENSP00000369154	ENSMUSG00000027796	Smad9
SMAD3	SMAD family member 3 [Source:HGNC Symbol;Acc:6769]	ENSG00000166949	ENSP00000332973	ENSMUSG00000032402	Smad3
SMAD4	SMAD family member 4 [Source:HGNC Symbol;Acc:6770]	ENSG00000141646	ENSP00000341551	ENSMUSG00000024515	Smad4
SMAD7	MAD family member 7 [Source:HGNC Symbol;Acc:6773]	ENSG00000101665	ENSP00000262158	ENSMUSG00000025880	Smad7
SMAD6	SMAD family member 6 [Source:HGNC Symbol;Acc:6772]	ENSG00000137834	ENSP00000288840	ENSMUSG00000036867	Smad6
PRPF39	PRP39 pre-mRNA processing factor 39 homolog (S. cerevisiae) [Source:HGNC Symbol;Acc:20314]	ENSG00000185246	ENSP00000348010	ENSMUSG00000035597	Prpf39
SRP68	signal recognition particle 68kDa [Source:HGNC Symbol;Acc:11302]	ENSG00000167881	ENSP00000312066	ENSMUSG00000020780	Srp68
ADARB2	adenosine deaminase, RNA-specific, B2 [Source:HGNC Symbol;Acc:227]	ENSG00000185736	ENSP00000370713	ENSMUSG00000052551	Adarb2
ADAD1	adenosine deaminase domain containing 1 (testis-specific) [Source:HGNC Symbol;Acc:30713]	ENSG00000164113	ENSP00000373376	ENSMUSG00000027719	Adad1
ADAD2	adenosine deaminase domain containing 2 [Source:HGNC Symbol;Acc:30714]	ENSG00000140955	ENSP00000268624	ENSMUSG00000024266	Adad2
ADAT1	adenosine deaminase, tRNA-specific 1 [Source:HGNC Symbol;Acc:228]	ENSG00000065457	ENSP00000457501	ENSMUSG00000031949	Adat1
ADARB1	adenosine deaminase, RNA-specific, B1 [Source:HGNC Symbol;Acc:226]	ENSG00000197381	ENSP00000441897	ENSMUSG00000020262	Adarb1
ADAR	adenosine deaminase, RNA-specific [Source:HGNC Symbol;Acc:225]	ENSG00000160710	ENSP00000357459	ENSMUSG00000027951	Adar
CLK3	CDC-like kinase 3 [Source:HGNC Symbol;Acc:2071]	ENSG00000179335	ENSP00000344112	ENSMUSG00000032316	Clk3
CLK4	CDC-like kinase 4 [Source:HGNC Symbol;Acc:13659]	ENSG00000113240	ENSP00000316948	ENSMUSG00000020385	Clk4
PRPF4B	PRP4 pre-mRNA processing factor 4 homolog B (yeast) [Source:HGNC Symbol;Acc:17346]	ENSG00000112739	ENSP00000337194	ENSMUSG00000021413	Prpf4b
CLK1	CDC-like kinase 1 [Source:HGNC Symbol;Acc:2068]	ENSG00000013441	ENSP00000326830	ENSMUSG00000026034	Clk1
CLK2	CDC-like kinase 2 [Source:HGNC Symbol;Acc:2069]	ENSG00000176444	ENSP00000354856	ENSMUSG00000068917	Clk2
LSM3	LSM3 homolog, U6 small nuclear RNA associated (S. cerevisiae) [Source:HGNC Symbol;Acc:17874]	ENSG00000170860	ENSP00000302160	ENSMUSG00000034192	Lsm3
FAM46A	family with sequence similarity 46, member A [Source:HGNC Symbol;Acc:18345]	ENSG00000112773	ENSP00000358769	ENSMUSG00000032265	Tent5a
CRYZ	crystallin, zeta (quinone reductase) [Source:HGNC Symbol;Acc:2419]	ENSG00000116791	ENSP00000399805	ENSMUSG00000028199	Cryz
KIN	KIN, antigenic determinant of recA protein homolog (mouse) [Source:HGNC Symbol;Acc:6327]	ENSG00000151657	ENSP00000368881	ENSMUSG00000037262	Kin
RPS2	ribosomal protein S2 [Source:HGNC Symbol;Acc:10404]	ENSG00000140988	ENSP00000433034	ENSMUSG00000044533	Rps2
DUS4L	dihydrouridine synthase 4-like (S. cerevisiae) [Source:HGNC Symbol;Acc:21517]	ENSG00000105865	ENSP00000265720	ENSMUSG00000020648	Dus4l
EIF4A1	eukaryotic translation initiation factor 4A1 [Source:HGNC Symbol;Acc:3282]	ENSG00000161960	ENSP00000463486	ENSMUSG00000059796	Eif4a1
EIF4A2	eukaryotic translation initiation factor 4A2 [Source:HGNC Symbol;Acc:3284]	ENSG00000156976	ENSP00000398370	ENSMUSG00000022884	Eif4a2
EIF4A3	eukaryotic translation initiation factor 4A3 [Source:HGNC Symbol;Acc:18683]	ENSG00000141543	ENSP00000269349	ENSMUSG00000025580	Eif4a3
IGF2BP1	insulin-like growth factor 2 mRNA binding protein 1 [Source:HGNC Symbol;Acc:28866]	ENSG00000159217	ENSP00000290341	ENSMUSG00000013415	Igf2bp1
IGF2BP2	insulin-like growth factor 2 mRNA binding protein 2 [Source:HGNC Symbol;Acc:28867]	ENSG00000073792	ENSP00000320204	ENSMUSG00000033581	Igf2bp2
IGF2BP3	insulin-like growth factor 2 mRNA binding protein 3 [Source:HGNC Symbol;Acc:28868]	ENSG00000136231	ENSP00000258729	ENSMUSG00000029814	Igf2bp3
UBAP2	ubiquitin associated protein 2 [Source:HGNC Symbol;Acc:14185]	ENSG00000137073	ENSP00000368540	ENSMUSG00000028433	Ubap2
UBAP2L	ubiquitin associated protein 2-like [Source:HGNC Symbol;Acc:29877]	ENSG00000143569	ENSP00000345308	ENSMUSG00000042520	Ubap2l
SNRPE	small nuclear ribonucleoprotein polypeptide E [Source:HGNC Symbol;Acc:11161]	ENSG00000182004	ENSP00000400591	ENSMUSG00000090553	Snrpe
EIF2B5	eukaryotic translation initiation factor 2B, subunit 5 epsilon, 82kDa [Source:HGNC Symbol;Acc:3261]	ENSG00000145191	ENSP00000409142	ENSMUSG00000003235	Eif2b5
CRNKL1	crooked neck pre-mRNA splicing factor-like 1 (Drosophila) [Source:HGNC Symbol;Acc:15762]	ENSG00000101343	ENSP00000440733	ENSMUSG00000001767	Crnkl1
POLRMT	polymerase (RNA) mitochondrial (DNA directed) [Source:HGNC Symbol;Acc:9200]	ENSG00000099821	ENSP00000465759	ENSMUSG00000020329	Polrmt
METTL10	methyltransferase like 10 [Source:HGNC Symbol;Acc:33787]	ENSG00000203791	ENSP00000357829	ENSMUSG00000030960	Eef1akmt2
MRPL41	mitochondrial ribosomal protein L41 [Source:HGNC Symbol;Acc:14492]	ENSG00000182154	ENSP00000360498	ENSMUSG00000036850	Mrpl41
MRPS7	mitochondrial ribosomal protein S7 [Source:HGNC Symbol;Acc:14499]	ENSG00000125445	ENSP00000463263	ENSMUSG00000046756	Mrps7
NSUN5	NOP2/Sun domain family, member 5 [Source:HGNC Symbol;Acc:16385]	ENSG00000130305	ENSP00000393081	ENSMUSG00000000916	Nsun5
NSUN7	NOP2/Sun domain family, member 7 [Source:HGNC Symbol;Acc:25857]	ENSG00000179299	ENSP00000371201	ENSMUSG00000029206	Nsun7
MTG1	Mitochondrial GTPase 1 [Source:UniProtKB/TrEMBL;Acc:E9PI62]	ENSG00000254536	ENSP00000436767	ENSMUSG00000025464	Paox
MRPS28	mitochondrial ribosomal protein S28 [Source:HGNC Symbol;Acc:14513]	ENSG00000147586	ENSP00000430401	ENSMUSG00000040269	Mrps28
TDRD10	tudor domain containing 10 [Source:HGNC Symbol;Acc:25316]	ENSG00000163239	ENSP00000357467	#N/A	#N/A
RPUSD1	RNA pseudouridylate synthase domain containing 1 [Source:HGNC Symbol;Acc:14173]	ENSG00000007376	ENSP00000456692	ENSMUSG00000041199	Rpusd1
NHP2	NHP2 ribonucleoprotein [Source:HGNC Symbol;Acc:14377]	ENSG00000145912	ENSP00000423803	ENSMUSG00000001056	Nhp2
XAB2	XPA binding protein 2 [Source:HGNC Symbol;Acc:14089]	ENSG00000076924	ENSP00000351137	ENSMUSG00000019470	Xab2
FAU	Finkel-Biskis-Reilly murine sarcoma virus (FBR-MuSV) ubiquitously expressed [Source:HGNC Symbol;Acc:3597]	ENSG00000149806	ENSP00000435370	ENSMUSG00000038274	Fau
RRP36	ribosomal RNA processing 36 homolog (S. cerevisiae) [Source:HGNC Symbol;Acc:21374]	ENSG00000124541	ENSP00000244496	ENSMUSG00000023971	Rrp36
GRWD1	glutamate-rich WD repeat containing 1 [Source:HGNC Symbol;Acc:21270]	ENSG00000105447	ENSP00000253237	ENSMUSG00000053801	Grwd1
ENDOV	endonuclease V [Source:HGNC Symbol;Acc:26640]	ENSG00000173818	ENSP00000429190	ENSMUSG00000039850	Endov
VARSL	Valine--tRNA ligase, mitochondrial; Valyl-tRNA synthetase like [Source:UniProtKB/TrEMBL;Acc:A2ABL6]	ENSG00000206476	ENSP00000446608	#N/A	#N/A
MRRF	mitochondrial ribosome recycling factor [Source:HGNC Symbol;Acc:7234]	ENSG00000148187	ENSP00000395072	ENSMUSG00000026887	Mrrf
MTFMT	mitochondrial methionyl-tRNA formyltransferase [Source:HGNC Symbol;Acc:29666]	ENSG00000103707	ENSP00000220058	ENSMUSG00000059183	Mtfmt
C12orf65	chromosome 12 open reading frame 65 [Source:HGNC Symbol;Acc:26784]	ENSG00000130921	ENSP00000390647	ENSMUSG00000047635	2810006K23Rik
MRTO4	mRNA turnover 4 homolog (S. cerevisiae) [Source:HGNC Symbol;Acc:18477]	ENSG00000053372	ENSP00000364320	ENSMUSG00000028741	Mrto4
RBM26	RNA binding motif protein 26 [Source:HGNC Symbol;Acc:20327]	ENSG00000139746	ENSP00000267229	ENSMUSG00000022119	Rbm26
RBM27	RNA binding motif protein 27 [Source:HGNC Symbol;Acc:29243]	ENSG00000091009	ENSP00000265271	ENSMUSG00000024491	Rbm27
DIS3	DIS3 mitotic control homolog (S. cerevisiae) [Source:HGNC Symbol;Acc:20604]	ENSG00000083520	ENSP00000367011	ENSMUSG00000033166	Dis3
DIS3L	DIS3 mitotic control homolog (S. cerevisiae)-like [Source:HGNC Symbol;Acc:28698]	ENSG00000166938	ENSP00000321711	ENSMUSG00000032396	Dis3l
DIS3L2	DIS3 mitotic control homolog (S. cerevisiae)-like 2 [Source:HGNC Symbol;Acc:28648]	ENSG00000144535	ENSP00000390467	ENSMUSG00000053333	Dis3l2
C1QBP	complement component 1, q subcomponent binding protein [Source:HGNC Symbol;Acc:1243]	ENSG00000108561	ENSP00000225698	ENSMUSG00000018446	C1qbp
SUB1	SUB1 homolog (S. cerevisiae) [Source:HGNC Symbol;Acc:19985]	ENSG00000113387	ENSP00000426850	ENSMUSG00000022205	Sub1
MRPS33	mitochondrial ribosomal protein S33 [Source:HGNC Symbol;Acc:16634]	ENSG00000090263	ENSP00000376732	ENSMUSG00000029918	Mrps33
PRPF6	PRP6 pre-mRNA processing factor 6 homolog (S. cerevisiae) [Source:HGNC Symbol;Acc:15860]	ENSG00000101161	ENSP00000266079	ENSMUSG00000002455	Prpf6
SMG8	smg-8 homolog, nonsense mediated mRNA decay factor (C. elegans) [Source:HGNC Symbol;Acc:25551]	ENSG00000167447	ENSP00000438748	ENSMUSG00000020495	Smg8
PSTK	phosphoseryl-tRNA kinase [Source:HGNC Symbol;Acc:28578]	ENSG00000179988	ENSP00000357882	ENSMUSG00000063179	Pstk
GAPDH	glyceraldehyde-3-phosphate dehydrogenase [Source:HGNC Symbol;Acc:4141]	ENSG00000111640	ENSP00000229239	ENSMUSG00000081607	Gm15294
TNPO3	transportin 3 [Source:HGNC Symbol;Acc:17103]	ENSG00000064419	ENSP00000418267	ENSMUSG00000012535	Tnpo3
IPO13	importin 13 [Source:HGNC Symbol;Acc:16853]	ENSG00000117408	ENSP00000361418	ENSMUSG00000033365	Ipo13
MOV10	Mov10, Moloney leukemia virus 10, homolog (mouse) [Source:HGNC Symbol;Acc:7200]	ENSG00000155363	ENSP00000399797	ENSMUSG00000002227	Mov10
MOV10L1	Mov10l1, Moloney leukemia virus 10-like 1, homolog (mouse) [Source:HGNC Symbol;Acc:7201]	ENSG00000073146	ENSP00000438978	ENSMUSG00000015365	Mov10l1
PARP1	poly (ADP-ribose) polymerase 1 [Source:HGNC Symbol;Acc:270]	ENSG00000143799	ENSP00000355759	ENSMUSG00000026496	Parp1
MRPS35	mitochondrial ribosomal protein S35 [Source:HGNC Symbol;Acc:16635]	ENSG00000061794	ENSP00000081029	ENSMUSG00000040112	Mrps35
GPKOW	G patch domain and KOW motifs [Source:HGNC Symbol;Acc:30677]	ENSG00000268675	ENSP00000471681	ENSMUSG00000031148	Gpkow
SETD1A	SET domain containing 1A [Source:HGNC Symbol;Acc:29010]	ENSG00000099381	ENSP00000262519	ENSMUSG00000042308	Setd1a
SETD1B	SET domain containing 1B [Source:HGNC Symbol;Acc:29187]	ENSG00000139718	ENSP00000442924	ENSMUSG00000038384	Setd1b
SF3A2	splicing factor 3a, subunit 2, 66kDa [Source:HGNC Symbol;Acc:10766]	ENSG00000104897	ENSP00000221494	ENSMUSG00000020211	Sf3a2
AFF1	AF4/FMR2 family, member 1 [Source:HGNC Symbol;Acc:7135]	ENSG00000172493	ENSP00000378578	ENSMUSG00000029313	Aff1
AFF3	AF4/FMR2 family, member 3 [Source:HGNC Symbol;Acc:6473]	ENSG00000144218	ENSP00000411383	ENSMUSG00000037138	Aff3
AFF4	AF4/FMR2 family, member 4 [Source:HGNC Symbol;Acc:17869]	ENSG00000072364	ENSP00000395268	ENSMUSG00000049470	Aff4
AFF2	AF4/FMR2 family, member 2 [Source:HGNC Symbol;Acc:3776]	ENSG00000269754	ENSP00000472279	ENSMUSG00000031189	Aff2
PARK7	parkinson protein 7 [Source:HGNC Symbol;Acc:16369]	ENSG00000116288	ENSP00000418770	ENSMUSG00000028964	Park7
TRNAU1AP	tRNA selenocysteine 1 associated protein 1 [Source:HGNC Symbol;Acc:30813]	ENSG00000180098	ENSP00000362936	ENSMUSG00000028898	Trnau1ap
SRBD1	S1 RNA binding domain 1 [Source:HGNC Symbol;Acc:25521]	ENSG00000068784	ENSP00000263736	ENSMUSG00000024135	Srbd1
EIF3D	eukaryotic translation initiation factor 3, subunit D [Source:HGNC Symbol;Acc:3278]	ENSG00000100353	ENSP00000216190	ENSMUSG00000016554	Eif3d
NOP10	NOP10 ribonucleoprotein [Source:HGNC Symbol;Acc:14378]	ENSG00000182117	ENSP00000453475	ENSMUSG00000027133	Nop10
WARS	tryptophanyl-tRNA synthetase [Source:HGNC Symbol;Acc:12729]	ENSG00000140105	ENSP00000452519	ENSMUSG00000021266	Wars
MATR3	matrin 3 [Source:HGNC Symbol;Acc:6912]	ENSG00000015479	ENSP00000378279	ENSMUSG00000117694	Snhg4
SNRPD1	small nuclear ribonucleoprotein D1 polypeptide 16kDa [Source:HGNC Symbol;Acc:11158]	ENSG00000167088	ENSP00000300413	ENSMUSG00000002477	Snrpd1
SNRPC	small nuclear ribonucleoprotein polypeptide C [Source:HGNC Symbol;Acc:11157]	ENSG00000124562	ENSP00000244520	ENSMUSG00000024217	Snrpc
FXR1	fragile X mental retardation, autosomal homolog 1 [Source:HGNC Symbol;Acc:4023]	ENSG00000114416	ENSP00000420643	ENSMUSG00000027680	Fxr1
FXR2	fragile X mental retardation, autosomal homolog 2 [Source:HGNC Symbol;Acc:4024]	ENSG00000129245	ENSP00000250113	ENSMUSG00000018765	Fxr2
FMR1	fragile X mental retardation 1 [Source:HGNC Symbol;Acc:3775]	ENSG00000102081	ENSP00000359506	ENSMUSG00000000838	Fmr1
MEPCE	methylphosphate capping enzyme [Source:HGNC Symbol;Acc:20247]	ENSG00000146834	ENSP00000308546	ENSMUSG00000029726	Mepce
KAT8	K(lysine) acetyltransferase 8 [Source:HGNC Symbol;Acc:17933]	ENSG00000103510	ENSP00000406037	ENSMUSG00000030801	Kat8
CIRBP	cold inducible RNA binding protein [Source:HGNC Symbol;Acc:1982]	ENSG00000099622	ENSP00000465558	ENSMUSG00000045193	Cirbp
RBM3	RNA binding motif (RNP1, RRM) protein 3 [Source:HGNC Symbol;Acc:9900]	ENSG00000102317	ENSP00000365950	ENSMUSG00000031167	Rbm3
CNOT7	CCR4-NOT transcription complex, subunit 7 [Source:HGNC Symbol;Acc:14101]	ENSG00000198791	ENSP00000430160	ENSMUSG00000031601	Cnot7
CNOT8	CCR4-NOT transcription complex, subunit 8 [Source:HGNC Symbol;Acc:9207]	ENSG00000155508	ENSP00000430493	ENSMUSG00000020515	Cnot8
A1CF	APOBEC1 complementation factor [Source:HGNC Symbol;Acc:24086]	ENSG00000148584	ENSP00000282641	ENSMUSG00000052595	A1cf
RBM46	RNA binding motif protein 46 [Source:HGNC Symbol;Acc:28401]	ENSG00000151962	ENSP00000424500	ENSMUSG00000033882	Rbm46
RBM47	RNA binding motif protein 47 [Source:HGNC Symbol;Acc:30358]	ENSG00000163694	ENSP00000423243	ENSMUSG00000070780	Rbm47
DND1	dead end homolog 1 (zebrafish) [Source:HGNC Symbol;Acc:23799]	ENSG00000256453	ENSP00000445366	ENSMUSG00000044595	Dnd1
HNRNPR	heterogeneous nuclear ribonucleoprotein R [Source:HGNC Symbol;Acc:5047]	ENSG00000125944	ENSP00000363741	ENSMUSG00000066037	Hnrnpr
SYNCRIP	synaptotagmin binding, cytoplasmic RNA interacting protein [Source:HGNC Symbol;Acc:16918]	ENSG00000135316	ENSP00000358635	ENSMUSG00000032423	Syncrip
ABCE1	ATP-binding cassette, sub-family E (OABP), member 1 [Source:HGNC Symbol;Acc:69]	ENSG00000164163	ENSP00000296577	ENSMUSG00000058355	Abce1
GPATCH4	G patch domain containing 4 [Source:HGNC Symbol;Acc:25982]	ENSG00000160818	ENSP00000412620	ENSMUSG00000028069	Gpatch4
PAIP1	poly(A) binding protein interacting protein 1 [Source:HGNC Symbol;Acc:16945]	ENSG00000172239	ENSP00000425675	ENSMUSG00000025451	Paip1
RBM20	RNA binding motif protein 20 [Source:HGNC Symbol;Acc:27424]	ENSG00000203867	ENSP00000358532	ENSMUSG00000043639	Rbm20
GNL3	guanine nucleotide binding protein-like 3 (nucleolar) [Source:HGNC Symbol;Acc:29931]	ENSG00000163938	ENSP00000378278	ENSMUSG00000042354	Gnl3
GNL3L	guanine nucleotide binding protein-like 3 (nucleolar)-like [Source:HGNC Symbol;Acc:25553]	ENSG00000130119	ENSP00000338573	ENSMUSG00000025266	Gnl3l
FAM120A	family with sequence similarity 120A [Source:HGNC Symbol;Acc:13247]	ENSG00000048828	ENSP00000277165	ENSMUSG00000038014	Fam120a
FAM120B	family with sequence similarity 120B [Source:HGNC Symbol;Acc:21109]	ENSG00000112584	ENSP00000417970	ENSMUSG00000014763	Fam120b
FAM120C	family with sequence similarity 120C [Source:HGNC Symbol;Acc:16949]	ENSG00000184083	ENSP00000364324	ENSMUSG00000025262	Fam120c
KHDC1	KH homology domain containing 1 [Source:HGNC Symbol;Acc:21366] [Type: protein coding Ensembl/Havana merge]	ENSG00000135314	ENSP00000359411	ENSMUSG00000067750	Khdc1a
KHDC1L	Putative KHDC1-like protein [Source:UniProtKB/TrEMBL;Acc:F5H697] [Type: protein coding Havana]	ENSG00000243501	ENSP00000359415	ENSMUSG00000067750	Khdc1a
RPL10L	ribosomal protein L10-like [Source:HGNC Symbol;Acc:17976]	ENSG00000165496	ENSP00000298283	ENSMUSG00000060499	Rpl10l
RPL10	ribosomal protein L10 [Source:HGNC Symbol;Acc:10298]	ENSG00000147403	ENSP00000341730	ENSMUSG00000008682	Rpl10
EIF2S1	eukaryotic translation initiation factor 2, subunit 1 alpha, 35kDa [Source:HGNC Symbol;Acc:3265]	ENSG00000134001	ENSP00000256383	ENSMUSG00000021116	Eif2s1
MRPL20	mitochondrial ribosomal protein L20 [Source:HGNC Symbol;Acc:14478]	ENSG00000242485	ENSP00000341082	ENSMUSG00000029066	Mrpl20
EPRS	glutamyl-prolyl-tRNA synthetase [Source:HGNC Symbol;Acc:3418]	ENSG00000136628	ENSP00000355890	ENSMUSG00000026615	Eprs
DHX58	DEXH (Asp-Glu-X-His) box polypeptide 58 [Source:HGNC Symbol;Acc:29517]	ENSG00000260178	ENSP00000455290	ENSMUSG00000017830	Dhx58
DDX58	DEAD (Asp-Glu-Ala-Asp) box polypeptide 58 [Source:HGNC Symbol;Acc:19102]	ENSG00000107201	ENSP00000369213	ENSMUSG00000040296	Ddx58
IFIH1	interferon induced with helicase C domain 1 [Source:HGNC Symbol;Acc:18873]	ENSG00000115267	ENSP00000263642	ENSMUSG00000026896	Ifih1
CDK5RAP1	CDK5 regulatory subunit associated protein 1 [Source:HGNC Symbol;Acc:15880]	ENSG00000101391	ENSP00000217372	ENSMUSG00000027487	Cdk5rap1
HABP4	hyaluronan binding protein 4 [Source:HGNC Symbol;Acc:17062]	ENSG00000130956	ENSP00000364398	ENSMUSG00000021476	Habp4
SERBP1	SERPINE1 mRNA binding protein 1 [Source:HGNC Symbol;Acc:17860]	ENSG00000142864	ENSP00000360029	ENSMUSG00000036371	Serbp1
METTL5	methyltransferase like 5 [Source:HGNC Symbol;Acc:25006] [Type: protein coding Ensembl/Havana merge]	ENSG00000138382	ENSP00000260953	ENSMUSG00000051730	Mettl5
ZCCHC7	zinc finger, CCHC domain containing 7 [Source:HGNC Symbol;Acc:26209]	ENSG00000147905	ENSP00000337839	ENSMUSG00000035649	Zcchc7
WDR36	WD repeat domain 36 [Source:HGNC Symbol;Acc:30696]	ENSG00000134987	ENSP00000424628	ENSMUSG00000038299	Wdr36
CCDC86	coiled-coil domain containing 86 [Source:HGNC Symbol;Acc:28359]	ENSG00000110104	ENSP00000227520	ENSMUSG00000024732	Ccdc86
C2orf15	chromosome 2 open reading frame 15 [Source:HGNC Symbol;Acc:28436]	ENSG00000241962	ENSP00000420959	ENSMUSG00000026087	Mrpl30
MRPL30	mitochondrial ribosomal protein L30 [Source:HGNC Symbol;Acc:14036]	ENSG00000185414	ENSP00000386970	ENSMUSG00000026087	Mrpl30
RPS26	ribosomal protein S26 [Source:HGNC Symbol;Acc:10414]	ENSG00000197728	ENSP00000348849	ENSMUSG00000025362	Rps26
TEX13A	testis expressed 13A [Source:HGNC Symbol;Acc:11735]	ENSG00000133149	ENSP00000399753	ENSMUSG00000071686	Tex13a
BARD1	BRCA1 associated RING domain 1 [Source:HGNC Symbol;Acc:952]	ENSG00000138376	ENSP00000260947	ENSMUSG00000026196	Bard1
XPO4	exportin 4 [Source:HGNC Symbol;Acc:17796]	ENSG00000132953	ENSP00000383444	ENSMUSG00000021952	Xpo4
RUVBL1	RuvB-like 1 (E. coli) [Source:HGNC Symbol;Acc:10474] [Type: protein coding Ensembl/Havana merge]	ENSG00000175792	ENSP00000318297	ENSMUSG00000030079	Ruvbl1
IMP4	IMP4, U3 small nucleolar ribonucleoprotein, homolog (yeast) [Source:HGNC Symbol;Acc:30856]	ENSG00000136718	ENSP00000389701	ENSMUSG00000026127	Imp4
DDX52	DEAD (Asp-Glu-Ala-Asp) box polypeptide 52 [Source:HGNC Symbol;Acc:20038]	ENSG00000141141	ENSP00000377893	ENSMUSG00000020677	Ddx52
THOC1	THO complex 1 [Source:HGNC Symbol;Acc:19070]	ENSG00000079134	ENSP00000261600	ENSMUSG00000024287	Thoc1
TRPT1	tRNA phosphotransferase 1 [Source:HGNC Symbol;Acc:20316]	ENSG00000149743	ENSP00000439586	ENSMUSG00000047656	Trpt1
NHP2L1	NHP2 non-histone chromosome protein 2-like 1 (S. cerevisiae) [Source:HGNC Symbol;Acc:7819]	ENSG00000100138	ENSP00000383989	ENSMUSG00000063480	Snu13
EIF2B2	eukaryotic translation initiation factor 2B, subunit 2 beta, 39kDa [Source:HGNC Symbol;Acc:3258]	ENSG00000119718	ENSP00000266126	ENSMUSG00000004788	Eif2b2
RNF113B	ring finger protein 113B [Source:HGNC Symbol;Acc:17267]	ENSG00000139797	ENSP00000267291	ENSMUSG00000036537	Rnf113a1
RNF113A	ring finger protein 113A [Source:HGNC Symbol;Acc:12974]	ENSG00000125352	ENSP00000360497	ENSMUSG00000098134	Rnf113a2
INTS10	integrator complex subunit 10 [Source:HGNC Symbol;Acc:25548] [Type: protein coding Ensembl/Havana merge]	ENSG00000104613	ENSP00000381064	ENSMUSG00000031864	Ints10
LENG9	Leukocyte receptor cluster (LRC) member 9 [Source:UniProtKB/TrEMBL;Acc:B0VJZ1]	ENSG00000262887	ENSP00000458921	ENSMUSG00000043432	Leng9
RPS29	ribosomal protein S29 [Source:HGNC Symbol;Acc:10419]	ENSG00000213741	ENSP00000245458	ENSMUSG00000034892	Rps29
NOP16	NOP16 nucleolar protein [Source:HGNC Symbol;Acc:26934]	ENSG00000048162	ENSP00000427489	ENSMUSG00000025869	Nop16
U2AF1	U2 small nuclear RNA auxiliary factor 1 [Source:HGNC Symbol;Acc:12453]	ENSG00000160201	ENSP00000369629	ENSMUSG00000061613	U2af1
U2AF1L4	U2 small nuclear RNA auxiliary factor 1-like 4 [Source:HGNC Symbol;Acc:23020]	ENSG00000161265	ENSP00000368258	ENSMUSG00000078765	U2af1l4
RANBP6	RAN binding protein 6 [Source:HGNC Symbol;Acc:9851]	ENSG00000137040	ENSP00000259569	ENSMUSG00000074909	Ranbp6
IPO5	importin 5 [Source:HGNC Symbol;Acc:6402]	ENSG00000065150	ENSP00000350219	ENSMUSG00000030662	Ipo5
THOC7	THO complex 7 homolog (Drosophila) [Source:HGNC Symbol;Acc:29874]	ENSG00000163634	ENSP00000295899	ENSMUSG00000053453	Thoc7
DNMT3B	DNA (cytosine-5-)-methyltransferase 3 beta [Source:HGNC Symbol;Acc:2979]	ENSG00000088305	ENSP00000328547	ENSMUSG00000082079	Dnmt3c
GFM1	G elongation factor, mitochondrial 1 [Source:HGNC Symbol;Acc:13780]	ENSG00000168827	ENSP00000264263	ENSMUSG00000027774	Gfm1
RNASE9	ribonuclease, RNase A family, 9 (non-active) [Source:HGNC Symbol;Acc:20673]	ENSG00000188655	ENSP00000451565	ENSMUSG00000052382	Rnase9
PLRG1	pleiotropic regulator 1 [Source:HGNC Symbol;Acc:9089]	ENSG00000171566	ENSP00000424417	ENSMUSG00000027998	Plrg1
REXO1	REX1, RNA exonuclease 1 homolog (S. cerevisiae) [Source:HGNC Symbol;Acc:24616]	ENSG00000079313	ENSP00000170168	ENSMUSG00000047417	Rexo1
ZC3HAV1L	zinc finger CCCH-type, antiviral 1-like [Source:HGNC Symbol;Acc:22423] [Type: protein coding Ensembl/Havana merge]	ENSG00000146858	ENSP00000275766	ENSMUSG00000047749	Zc3hav1l
LSM14A	LSM14A, SCD6 homolog A (S. cerevisiae) [Source:HGNC Symbol;Acc:24489]	ENSG00000262860	ENSP00000460896	ENSMUSG00000066568	Lsm14a
LSM14B	LSM14B, SCD6 homolog B (S. cerevisiae) [Source:HGNC Symbol;Acc:15887]	ENSG00000149657	ENSP00000383172	ENSMUSG00000039108	Lsm14b
LUZP4	leucine zipper protein 4 [Source:HGNC Symbol;Acc:24971]	ENSG00000267900	ENSP00000472441	ENSMUSG00000079387	Luzp4
TDRD6	tudor domain containing 6 [Source:HGNC Symbol;Acc:21339]	ENSG00000180113	ENSP00000443299	ENSMUSG00000040140	Tdrd6
TDRD15	tudor domain containing 15 [Source:HGNC Symbol;Acc:45037]	ENSG00000218819	ENSP00000384376	#N/A	#N/A
MRPS22	mitochondrial ribosomal protein S22 [Source:HGNC Symbol;Acc:14508]	ENSG00000175110	ENSP00000420229	ENSMUSG00000032459	Mrps22
EEF1B2	eukaryotic translation elongation factor 1 beta 2 [Source:HGNC Symbol;Acc:3208]	ENSG00000114942	ENSP00000376056	ENSMUSG00000025967	Eef1b2
EEF1D	eukaryotic translation elongation factor 1 delta (guanine nucleotide exchange protein) [Source:HGNC Symbol;Acc:3211]	ENSG00000104529	ENSP00000433611	ENSMUSG00000055762	Eef1d
SIDT1	SID1 transmembrane family, member 1 [Source:HGNC Symbol;Acc:25967]	ENSG00000072858	ENSP00000264852	ENSMUSG00000022696	Sidt1
SIDT2	SID1 transmembrane family, member 2 [Source:HGNC Symbol;Acc:24272]	ENSG00000149577	ENSP00000314023	ENSMUSG00000034908	Sidt2
TRMT44	tRNA methyltransferase 44 homolog (S. cerevisiae) [Source:HGNC Symbol;Acc:26653]	ENSG00000155275	ENSP00000374387	ENSMUSG00000029097	Trmt44
GPATCH8	G patch domain containing 8 [Source:HGNC Symbol;Acc:29066]	ENSG00000186566	ENSP00000467556	ENSMUSG00000034621	Gpatch8
WDR4	WD repeat domain 4 [Source:HGNC Symbol;Acc:12756]	ENSG00000160193	ENSP00000381266	ENSMUSG00000024037	Wdr4
SLIRP	SRA stem-loop interacting RNA binding protein [Source:HGNC Symbol;Acc:20495]	ENSG00000119705	ENSP00000450909	ENSMUSG00000021040	Slirp
ATXN1	ataxin 1 [Source:HGNC Symbol;Acc:10548]	ENSG00000124788	ENSP00000416360	ENSMUSG00000046876	Atxn1
ATXN1L	ataxin 1-like [Source:HGNC Symbol;Acc:33279]	ENSG00000224470	ENSP00000415822	ENSMUSG00000069895	Atxn1l
YTHDF1	YTH domain family, member 1 [Source:HGNC Symbol;Acc:15867]	ENSG00000149658	ENSP00000359358	ENSMUSG00000038848	Ythdf1
YTHDF2	YTH domain family, member 2 [Source:HGNC Symbol;Acc:31675]	ENSG00000198492	ENSP00000444660	ENSMUSG00000040025	Ythdf2
YTHDF3	YTH domain family, member 3 [Source:HGNC Symbol;Acc:26465]	ENSG00000185728	ENSP00000473387	ENSMUSG00000047213	Ythdf3
LRPPRC	leucine-rich pentatricopeptide repeat containing [Source:HGNC Symbol;Acc:15714]	ENSG00000138095	ENSP00000260665	ENSMUSG00000024120	Lrpprc
TFIP11	tuftelin interacting protein 11 [Source:HGNC Symbol;Acc:17165]	ENSG00000100109	ENSP00000384297	ENSMUSG00000029345	Tfip11
ILF2	interleukin enhancer binding factor 2 [Source:HGNC Symbol;Acc:6037]	ENSG00000143621	ENSP00000355011	ENSMUSG00000001016	Ilf2
STRBP	spermatid perinuclear RNA binding protein [Source:HGNC Symbol;Acc:16462]	ENSG00000165209	ENSP00000321347	ENSMUSG00000026915	Strbp
ILF3	interleukin enhancer binding factor 3, 90kDa [Source:HGNC Symbol;Acc:6038]	ENSG00000129351	ENSP00000384660	ENSMUSG00000032178	Ilf3
TCERG1	transcription elongation regulator 1 [Source:HGNC Symbol;Acc:15630]	ENSG00000113649	ENSP00000296702	ENSMUSG00000024498	Tcerg1
NXF5	nuclear RNA export factor 5 [Source:HGNC Symbol;Acc:8075]	ENSG00000126952	ENSP00000442401	#N/A	#N/A
NXF2B	nuclear RNA export factor 2B [Source:HGNC Symbol;Acc:23984]	ENSG00000185945	ENSP00000361836	#N/A	#N/A
NXF2	HCG2045905, isoform CRA_a [Source:UniProtKB/TrEMBL;Acc:D3DX98]	ENSG00000269437	ENSP00000472530	ENSMUSG00000031410	Nxf7
NXF1	nuclear RNA export factor 1 [Source:HGNC Symbol;Acc:8071]	ENSG00000162231	ENSP00000294172	ENSMUSG00000010097	Nxf1
NXF3	nuclear RNA export factor 3 [Source:HGNC Symbol;Acc:8073]	ENSG00000147206	ENSP00000404017	ENSMUSG00000057000	Nxf3
ZRSR1	zinc finger (CCCH type), RNA-binding motif and serine/arginine rich 1 [Source:HGNC Symbol;Acc:12456]	ENSG00000212643	ENSP00000375133	ENSMUSG00000044068	Zrsr1
ZRSR2	zinc finger (CCCH type), RNA-binding motif and serine/arginine rich 2 [Source:HGNC Symbol;Acc:23019]	ENSG00000169249	ENSP00000303015	ENSMUSG00000044068	Zrsr1
MRPL35	mitochondrial ribosomal protein L35 [Source:HGNC Symbol;Acc:14489]	ENSG00000132313	ENSP00000338389	ENSMUSG00000052962	Mrpl35
RRS1	RRS1 ribosome biogenesis regulator homolog (S. cerevisiae) [Source:HGNC Symbol;Acc:17083]	ENSG00000179041	ENSP00000322396	ENSMUSG00000061024	Rrs1
PRKDC	protein kinase, DNA-activated, catalytic polypeptide [Source:HGNC Symbol;Acc:9413]	ENSG00000253729	ENSP00000442177	ENSMUSG00000022672	Prkdc
NOC2L	nucleolar complex associated 2 homolog (S. cerevisiae) [Source:HGNC Symbol;Acc:24517]	ENSG00000188976	ENSP00000317992	ENSMUSG00000095567	Noc2l
MTIF3	mitochondrial translational initiation factor 3 [Source:HGNC Symbol;Acc:29788]	ENSG00000122033	ENSP00000370508	ENSMUSG00000016510	Mtif3
NOL11	nucleolar protein 11 [Source:HGNC Symbol;Acc:24557]	ENSG00000130935	ENSP00000464015	ENSMUSG00000018433	Nol11
EXOSC3	exosome component 3 [Source:HGNC Symbol;Acc:17944]	ENSG00000107371	ENSP00000323046	ENSMUSG00000028322	Exosc3
PNPT1	polyribonucleotide nucleotidyltransferase 1 [Source:HGNC Symbol;Acc:23166]	ENSG00000138035	ENSP00000400646	ENSMUSG00000020464	Pnpt1
TSNAX	translin-associated factor X [Source:HGNC Symbol;Acc:12380]	ENSG00000116918	ENSP00000397537	ENSMUSG00000056820	Tsnax
RIOK1	RIO kinase 1 [Source:HGNC Symbol;Acc:18656]	ENSG00000124784	ENSP00000369162	ENSMUSG00000021428	Riok1
RIOK3	RIO kinase 3 [Source:HGNC Symbol;Acc:11451]	ENSG00000101782	ENSP00000462548	ENSMUSG00000024404	Riok3
PIWIL1	piwi-like 1 (Drosophila) [Source:HGNC Symbol;Acc:9007]	ENSG00000125207	ENSP00000245255	ENSMUSG00000029423	Piwil1
PIWIL2	piwi-like 2 (Drosophila) [Source:HGNC Symbol;Acc:17644]	ENSG00000197181	ENSP00000428267	ENSMUSG00000033644	Piwil2
PIWIL3	piwi-like 3 (Drosophila) [Source:HGNC Symbol;Acc:18443]	ENSG00000184571	ENSP00000431843	#N/A	#N/A
PIWIL4	piwi-like 4 (Drosophila) [Source:HGNC Symbol;Acc:18444]	ENSG00000134627	ENSP00000299001	ENSMUSG00000036912	Piwil4
PEG10	paternally expressed 10 [Source:HGNC Symbol;Acc:14005]	ENSG00000242265	ENSP00000417587	ENSMUSG00000092035	Peg10
ZCCHC5	zinc finger, CCHC domain containing 5 [Source:HGNC Symbol;Acc:22997]	ENSG00000179300	ENSP00000316794	ENSMUSG00000047686	Rtl3
POP7	processing of precursor 7, ribonuclease P/MRP subunit (S. cerevisiae) [Source:HGNC Symbol;Acc:19949]	ENSG00000172336	ENSP00000304353	ENSMUSG00000029715	Pop7
FASTKD3	FAST kinase domains 3 [Source:HGNC Symbol;Acc:28758]	ENSG00000124279	ENSP00000264669	ENSMUSG00000021532	Fastkd3
TBRG4	transforming growth factor beta regulator 4 [Source:HGNC Symbol;Acc:17443]	ENSG00000136270	ENSP00000420597	ENSMUSG00000000384	Tbrg4
FASTK	Fas-activated serine/threonine kinase [Source:HGNC Symbol;Acc:24676]	ENSG00000164896	ENSP00000297532	ENSMUSG00000028959	Fastk
TRMT13	tRNA methyltransferase 13 homolog (S. cerevisiae) [Source:HGNC Symbol;Acc:25502]	ENSG00000122435	ENSP00000359160	ENSMUSG00000033439	Trmt13
IREB2	iron-responsive element binding protein 2 [Source:HGNC Symbol;Acc:6115]	ENSG00000136381	ENSP00000258886	ENSMUSG00000032293	Ireb2
ACO1	aconitase 1, soluble [Source:HGNC Symbol;Acc:117]	ENSG00000122729	ENSP00000438733	ENSMUSG00000028405	Aco1
ZCCHC3	zinc finger, CCHC domain containing 3 [Source:HGNC Symbol;Acc:16230]	ENSG00000177764	ENSP00000371789	ENSMUSG00000074682	Zcchc3
SNUPN	snurportin 1 [Source:HGNC Symbol;Acc:14245]	ENSG00000169371	ENSP00000309831	ENSMUSG00000055334	Snupn
PTRHD1	peptidyl-tRNA hydrolase domain containing 1 [Source:HGNC Symbol;Acc:33782]	ENSG00000184924	ENSP00000330389	ENSMUSG00000096199	Ptrhd1
HARS	histidyl-tRNA synthetase [Source:HGNC Symbol;Acc:4816]	ENSG00000170445	ENSP00000411085	ENSMUSG00000001380	Hars
HARS2	histidyl-tRNA synthetase 2, mitochondrial [Source:HGNC Symbol;Acc:4817]	ENSG00000112855	ENSP00000230771	ENSMUSG00000019143	Hars2
HNRNPK	heterogeneous nuclear ribonucleoprotein K [Source:HGNC Symbol;Acc:5044]	ENSG00000165119	ENSP00000365458	ENSMUSG00000021546	Hnrnpk
PCBP1	poly(rC) binding protein 1 [Source:HGNC Symbol;Acc:8647]	ENSG00000169564	ENSP00000305556	ENSMUSG00000051695	Pcbp1
PCBP2	poly(rC) binding protein 2 [Source:HGNC Symbol;Acc:8648]	ENSG00000197111	ENSP00000394116	ENSMUSG00000056851	Pcbp2
PCBP3	poly(rC) binding protein 3 [Source:HGNC Symbol;Acc:8651]	ENSG00000183570	ENSP00000383165	ENSMUSG00000001120	Pcbp3
PCBP4	poly(rC) binding protein 4 [Source:HGNC Symbol;Acc:8652]	ENSG00000090097	ENSP00000395030	ENSMUSG00000023495	Pcbp4
AQR	aquarius homolog (mouse) [Source:HGNC Symbol;Acc:29513]	ENSG00000021776	ENSP00000156471	ENSMUSG00000040383	Aqr
ICT1	immature colon carcinoma transcript 1 [Source:HGNC Symbol;Acc:5359]	ENSG00000167862	ENSP00000301585	ENSMUSG00000018858	Mrpl58
UNK	unkempt homolog (Drosophila) [Source:HGNC Symbol;Acc:29369]	ENSG00000132478	ENSP00000293218	ENSMUSG00000020770	Unk
UNKL	unkempt homolog (Drosophila)-like [Source:HGNC Symbol;Acc:14184]	ENSG00000059145	ENSP00000373873	ENSMUSG00000015127	Unkl
CEBPZ	CCAAT/enhancer binding protein (C/EBP), zeta [Source:HGNC Symbol;Acc:24218]	ENSG00000115816	ENSP00000234170	ENSMUSG00000024081	Cebpz
MRPS9	mitochondrial ribosomal protein S9 [Source:HGNC Symbol;Acc:14501]	ENSG00000135972	ENSP00000258455	ENSMUSG00000060679	Mrps9
THG1L	tRNA-histidine guanylyltransferase 1-like (S. cerevisiae) [Source:HGNC Symbol;Acc:26053]	ENSG00000113272	ENSP00000231198	ENSMUSG00000011254	Thg1l
ZCCHC13	zinc finger, CCHC domain containing 13 [Source:HGNC Symbol;Acc:31749]	ENSG00000187969	ENSP00000345633	ENSMUSG00000031330	Zcchc13
CNBP	CCHC-type zinc finger, nucleic acid binding protein [Source:HGNC Symbol;Acc:13164]	ENSG00000169714	ENSP00000410769	ENSMUSG00000030057	Cnbp
SRRT	serrate RNA effector molecule homolog (Arabidopsis) [Source:HGNC Symbol;Acc:24101]	ENSG00000087087	ENSP00000391852	ENSMUSG00000037364	Srrt
CD2BP2	CD2 (cytoplasmic tail) binding protein 2 [Source:HGNC Symbol;Acc:1656]	ENSG00000169217	ENSP00000304903	ENSMUSG00000042502	Cd2bp2
SNRPG	small nuclear ribonucleoprotein polypeptide G [Source:HGNC Symbol;Acc:11163]	ENSG00000143977	ENSP00000272348	ENSMUSG00000057278	Snrpg
APTX	aprataxin [Source:HGNC Symbol;Acc:15984]	ENSG00000137074	ENSP00000369141	ENSMUSG00000028411	Aptx
RPL17	ribosomal protein L17 [Source:HGNC Symbol;Acc:10307]	ENSG00000265681	ENSP00000463885	ENSMUSG00000062328	Rpl17
BMS1	BMS1 homolog, ribosome assembly protein (yeast) [Source:HGNC Symbol;Acc:23505]	ENSG00000165733	ENSP00000363642	ENSMUSG00000030138	Bms1
SARS	seryl-tRNA synthetase [Source:HGNC Symbol;Acc:10537]	ENSG00000031698	ENSP00000358939	ENSMUSG00000068739	Sars
SARS2	Serine--tRNA ligase, mitochondrial [Source:UniProtKB/TrEMBL;Acc:E7EX87]	ENSG00000269547	ENSP00000472465	ENSMUSG00000070699	Sars2
PAIP2	poly(A) binding protein interacting protein 2 [Source:HGNC Symbol;Acc:17970]	ENSG00000120727	ENSP00000378275	ENSMUSG00000037058	Paip2
PAIP2B	poly(A) binding protein interacting protein 2B [Source:HGNC Symbol;Acc:29200]	ENSG00000124374	ENSP00000244221	ENSMUSG00000045896	Paip2b
GEMIN4	gem (nuclear organelle) associated protein 4 [Source:HGNC Symbol;Acc:15717] [Type: protein coding Ensembl/Havana merge]	ENSG00000179409	ENSP00000321706	ENSMUSG00000049396	Gemin4
PNRC2	proline-rich nuclear receptor coactivator 2 [Source:HGNC Symbol;Acc:23158]	ENSG00000189266	ENSP00000334840	ENSMUSG00000028675	Pnrc2
FASTKD2	FAST kinase domains 2 [Source:HGNC Symbol;Acc:29160]	ENSG00000118246	ENSP00000236980	ENSMUSG00000025962	Fastkd2
GEMIN6	gem (nuclear organelle) associated protein 6 [Source:HGNC Symbol;Acc:20044]	ENSG00000152147	ENSP00000387191	ENSMUSG00000055760	Gemin6
DDX20	DEAD (Asp-Glu-Ala-Asp) box polypeptide 20 [Source:HGNC Symbol;Acc:2743]	ENSG00000064703	ENSP00000358716	ENSMUSG00000027905	Ddx20
DDX39A	DEAD (Asp-Glu-Ala-Asp) box polypeptide 39A [Source:HGNC Symbol;Acc:17821]	ENSG00000123136	ENSP00000242776	ENSMUSG00000005481	Ddx39a
DDX39B	DEAD (Asp-Glu-Ala-Asp) box polypeptide 39B [Source:HGNC Symbol;Acc:13917]	ENSG00000237889	ENSP00000406348	ENSMUSG00000019432	Ddx39b
DHX37	DEAH (Asp-Glu-Ala-His) box polypeptide 37 [Source:HGNC Symbol;Acc:17210]	ENSG00000150990	ENSP00000311135	ENSMUSG00000029480	Dhx37
ZNF346	zinc finger protein 346 [Source:HGNC Symbol;Acc:16403]	ENSG00000113761	ENSP00000350869	ENSMUSG00000021481	Zfp346
MRPL50	mitochondrial ribosomal protein L50 [Source:HGNC Symbol;Acc:16654]	ENSG00000136897	ENSP00000443844	ENSMUSG00000044018	Mrpl50
RNASE1	ribonuclease, RNase A family, 1 (pancreatic) [Source:HGNC Symbol;Acc:10044]	ENSG00000129538	ENSP00000344193	ENSMUSG00000035896	Rnase1
RNASE2	ribonuclease, RNase A family, 2 (liver, eosinophil-derived neurotoxin) [Source:HGNC Symbol;Acc:10045]	ENSG00000169385	ENSP00000303276	ENSMUSG00000072596	Ear2
RNASE3	ribonuclease, RNase A family, 3 [Source:HGNC Symbol;Acc:10046]	ENSG00000169397	ENSP00000302324	ENSMUSG00000072596	Ear2
RNASE4	ribonuclease, RNase A family, 4 [Source:HGNC Symbol;Acc:10047]	ENSG00000258818	ENSP00000307096	ENSMUSG00000021876	Rnase4
RNASE6	ribonuclease, RNase A family, k6 [Source:HGNC Symbol;Acc:10048]	ENSG00000169413	ENSP00000302046	ENSMUSG00000021880	Rnase6
RNASE7	ribonuclease, RNase A family, 7 [Source:HGNC Symbol;Acc:19278]	ENSG00000165799	ENSP00000298690	#N/A	#N/A
RNASE8	ribonuclease, RNase A family, 8 [Source:HGNC Symbol;Acc:19277]	ENSG00000173431	ENSP00000311398	#N/A	#N/A
ANG	angiogenin, ribonuclease, RNase A family, 5 [Source:HGNC Symbol;Acc:483]	ENSG00000214274	ENSP00000336762	ENSMUSG00000060615	Ang4
DYNC1H1	dynein, cytoplasmic 1, heavy chain 1 [Source:HGNC Symbol;Acc:2961]	ENSG00000197102	ENSP00000348965	ENSMUSG00000018707	Dync1h1
FTSJ3	FtsJ homolog 3 (E. coli) [Source:HGNC Symbol;Acc:17136]	ENSG00000108592	ENSP00000396673	ENSMUSG00000020706	Ftsj3
SF3B2	splicing factor 3b, subunit 2, 145kDa [Source:HGNC Symbol;Acc:10769]	ENSG00000087365	ENSP00000318861	ENSMUSG00000024853	Sf3b2
CTU2	cytosolic thiouridylase subunit 2 homolog (S. pombe) [Source:HGNC Symbol;Acc:28005]	ENSG00000174177	ENSP00000388320	ENSMUSG00000049482	Ctu2
XPOT	exportin, tRNA [Source:HGNC Symbol;Acc:12826]	ENSG00000184575	ENSP00000383722	ENSMUSG00000034667	Xpot
RBMXL1	RNA binding motif protein, X-linked-like 1 [Source:HGNC Symbol;Acc:25073]	ENSG00000213516	ENSP00000318415	ENSMUSG00000037070	Rbmxl1
RBMXL2	RNA binding motif protein, X-linked-like 2 [Source:HGNC Symbol;Acc:17886]	ENSG00000170748	ENSP00000304139	ENSMUSG00000073894	Rbmxl2
RBMXL3	RNA binding motif protein, X-linked-like 3 [Source:HGNC Symbol;Acc:26859]	ENSG00000175718	ENSP00000417451	ENSMUSG00000073894	Rbmxl2
RBMY1A1	RNA binding motif protein, Y-linked, family 1, member A1 [Source:HGNC Symbol;Acc:9912]	ENSG00000234414	ENSP00000303712	ENSMUSG00000093987	Gm21704
RBMY1B	RNA binding motif protein, Y-linked, family 1, member B [Source:HGNC Symbol;Acc:23914]	ENSG00000242875	ENSP00000372484	ENSMUSG00000093987	Gm21704
RBMY1D	RNA binding motif protein, Y-linked, family 1, member D [Source:HGNC Symbol;Acc:23915]	ENSG00000244395	ENSP00000399181	ENSMUSG00000093987	Gm21704
RBMY1E	RNA binding motif protein, Y-linked, family 1, member E [Source:HGNC Symbol;Acc:23916]	ENSG00000242389	ENSP00000372104	ENSMUSG00000093987	Gm21704
RBMY1F	RNA binding motif protein, Y-linked, family 1, member F [Source:HGNC Symbol;Acc:23974]	ENSG00000169800	ENSP00000406005	ENSMUSG00000093987	Gm21704
RBMY1J	RNA binding motif protein, Y-linked, family 1, member J [Source:HGNC Symbol;Acc:23917]	ENSG00000226941	ENSP00000250831	ENSMUSG00000093987	Gm21704
RBMX	RNA binding motif protein, X-linked [Source:HGNC Symbol;Acc:9910]	ENSG00000147274	ENSP00000405117	ENSMUSG00000031134	Rbmx
PPP1R10	protein phosphatase 1, regulatory subunit 10 [Source:HGNC Symbol;Acc:9284]	ENSG00000235291	ENSP00000389299	ENSMUSG00000039220	Ppp1r10
PRR3	proline rich 3 [Source:HGNC Symbol;Acc:21149]	ENSG00000206491	ENSP00000404669	ENSMUSG00000038500	Prr3
DKC1	dyskeratosis congenita 1, dyskerin [Source:HGNC Symbol;Acc:2890]	ENSG00000130826	ENSP00000358563	ENSMUSG00000031403	Dkc1
MRPL17	mitochondrial ribosomal protein L17 [Source:HGNC Symbol;Acc:14053]	ENSG00000158042	ENSP00000288937	ENSMUSG00000030879	Mrpl17
TRA2A	transformer 2 alpha homolog (Drosophila) [Source:HGNC Symbol;Acc:16645]	ENSG00000164548	ENSP00000376290	ENSMUSG00000029817	Tra2a
TRA2B	transformer 2 beta homolog (Drosophila) [Source:HGNC Symbol;Acc:10781]	ENSG00000136527	ENSP00000371626	ENSMUSG00000022858	Tra2b
RPL26L1	ribosomal protein L26-like 1 [Source:HGNC Symbol;Acc:17050]	ENSG00000037241	ENSP00000265100	#N/A	#N/A
RPL26	ribosomal protein L26 [Source:HGNC Symbol;Acc:10327]	ENSG00000161970	ENSP00000463784	ENSMUSG00000060938	Rpl26
AUH	AU RNA binding protein/enoyl-CoA hydratase [Source:HGNC Symbol;Acc:890] [Type: protein coding Ensembl/Havana merge]	ENSG00000148090	ENSP00000364883	ENSMUSG00000021460	Auh
EIF3C	eukaryotic translation initiation factor 3, subunit C [Source:HGNC Symbol;Acc:3279]	ENSG00000184110	ENSP00000378953	ENSMUSG00000030738	Eif3c
EIF3CL	eukaryotic translation initiation factor 3, subunit C-like [Source:HGNC Symbol;Acc:26347]	ENSG00000205609	ENSP00000381916	ENSMUSG00000030738	Eif3c
SCAF8	SR-related CTD-associated factor 8 [Source:HGNC Symbol;Acc:20959]	ENSG00000213079	ENSP00000356154	ENSMUSG00000046201	Scaf8
SCAF4	SR-related CTD-associated factor 4 [Source:HGNC Symbol;Acc:19304]	ENSG00000156304	ENSP00000286835	ENSMUSG00000022983	Scaf4
EEF2K	eukaryotic elongation factor-2 kinase [Source:HGNC Symbol;Acc:24615]	ENSG00000103319	ENSP00000263026	ENSMUSG00000035064	Eef2k
RPL6	ribosomal protein L6 [Source:HGNC Symbol;Acc:10362]	ENSG00000089009	ENSP00000403172	ENSMUSG00000029614	Rpl6
MRPL11	mitochondrial ribosomal protein L11 [Source:HGNC Symbol;Acc:14042]	ENSG00000174547	ENSP00000415356	ENSMUSG00000024902	Mrpl11
G3BP1	GTPase activating protein (SH3 domain) binding protein 1 [Source:HGNC Symbol;Acc:30292]	ENSG00000145907	ENSP00000348578	ENSMUSG00000018583	G3bp1
G3BP2	GTPase activating protein (SH3 domain) binding protein 2 [Source:HGNC Symbol;Acc:30291]	ENSG00000138757	ENSP00000352738	ENSMUSG00000029405	G3bp2
MRPS26	mitochondrial ribosomal protein S26 [Source:HGNC Symbol;Acc:14045]	ENSG00000125901	ENSP00000369682	ENSMUSG00000037740	Mrps26
SF3B5	splicing factor 3b, subunit 5, 10kDa [Source:HGNC Symbol;Acc:21083]	ENSG00000169976	ENSP00000356541	ENSMUSG00000078348	Sf3b5
DHX34	DEAH (Asp-Glu-Ala-His) box polypeptide 34 [Source:HGNC Symbol;Acc:16719]	ENSG00000134815	ENSP00000331907	ENSMUSG00000006019	Dhx34
UTP23	UTP23, small subunit (SSU) processome component, homolog (yeast) [Source:HGNC Symbol;Acc:28224]	ENSG00000147679	ENSP00000349670	ENSMUSG00000022313	Utp23
SNRNP48	small nuclear ribonucleoprotein 48kDa (U11/U12) [Source:HGNC Symbol;Acc:21368]	ENSG00000168566	ENSP00000339834	ENSMUSG00000021431	Snrnp48
PRPF38B	PRP38 pre-mRNA processing factor 38 (yeast) domain containing B [Source:HGNC Symbol;Acc:25512]	ENSG00000134186	ENSP00000359042	ENSMUSG00000027881	Prpf38b
HEXIM1	hexamethylene bis-acetamide inducible 1 [Source:HGNC Symbol;Acc:24953]	ENSG00000186834	ENSP00000328773	ENSMUSG00000048878	Hexim1
HEXIM2	hexamethylene bis-acetamide inducible 2 [Source:HGNC Symbol;Acc:28591]	ENSG00000168517	ENSP00000302276	ENSMUSG00000043372	Hexim2
SRRM2	serine/arginine repetitive matrix 2 [Source:HGNC Symbol;Acc:16639]	ENSG00000167978	ENSP00000458230	ENSMUSG00000039218	Srrm2
SRRM3	serine/arginine repetitive matrix 3 [Source:HGNC Symbol;Acc:26729]	ENSG00000262321	ENSP00000458336	ENSMUSG00000039860	Srrm3
PIH1D3	PIH1 domain containing 3 [Source:HGNC Symbol;Acc:28570]	ENSG00000080572	ENSP00000337757	ENSMUSG00000042433	Dnaaf6b
DHX40	DEAH (Asp-Glu-Ala-His) box polypeptide 40 [Source:HGNC Symbol;Acc:18018]	ENSG00000108406	ENSP00000388749	ENSMUSG00000018425	Dhx40
DHX38	DEAH (Asp-Glu-Ala-His) box polypeptide 38 [Source:HGNC Symbol;Acc:17211]	ENSG00000140829	ENSP00000268482	ENSMUSG00000037993	Dhx38
TRMT61B	tRNA methyltransferase 61 homolog B (S. cerevisiae) [Source:HGNC Symbol;Acc:26070]	ENSG00000171103	ENSP00000302801	ENSMUSG00000085492	Trmt61b
CSDC2	cold shock domain containing C2, RNA binding [Source:HGNC Symbol;Acc:30359]	ENSG00000172346	ENSP00000417127	ENSMUSG00000042109	Csdc2
CARHSP1	calcium regulated heat stable protein 1, 24kDa [Source:HGNC Symbol;Acc:17150]	ENSG00000153048	ENSP00000455855	ENSMUSG00000008393	Carhsp1
POP4	processing of precursor 4, ribonuclease P/MRP subunit (S. cerevisiae) [Source:HGNC Symbol;Acc:30081]	ENSG00000105171	ENSP00000465213	ENSMUSG00000030423	Pop4
LARP6	La ribonucleoprotein domain family, member 6 [Source:HGNC Symbol;Acc:24012]	ENSG00000166173	ENSP00000299213	ENSMUSG00000034839	Larp6
RNPC3	RNA-binding region (RNP1, RRM) containing 3 [Source:HGNC Symbol;Acc:18666]	ENSG00000185946	ENSP00000391432	ENSMUSG00000027981	Rnpc3
RPL30	ribosomal protein L30 [Source:HGNC Symbol;Acc:10333]	ENSG00000156482	ENSP00000428085	ENSMUSG00000058600	Rpl30
RUVBL2	RuvB-like 2 (E. coli) [Source:HGNC Symbol;Acc:10475] [Type: protein coding Ensembl/Havana merge]	ENSG00000183207	ENSP00000473172	ENSMUSG00000003868	Ruvbl2
DRG1	developmentally regulated GTP binding protein 1 [Source:HGNC Symbol;Acc:3029]	ENSG00000185721	ENSP00000329715	ENSMUSG00000020457	Drg1
TRIM25	tripartite motif containing 25 [Source:HGNC Symbol;Acc:12932]	ENSG00000121060	ENSP00000323889	ENSMUSG00000000275	Trim25
RQCD1	RCD1 required for cell differentiation1 homolog (S. pombe) [Source:HGNC Symbol;Acc:10445]	ENSG00000144580	ENSP00000273064	ENSMUSG00000026174	Cnot9
MRPS18C	mitochondrial ribosomal protein S18C [Source:HGNC Symbol;Acc:16633]	ENSG00000163319	ENSP00000295491	ENSMUSG00000016833	Mrps18c
MRPL45	mitochondrial ribosomal protein L45 [Source:HGNC Symbol;Acc:16651]	ENSG00000174100	ENSP00000308901	ENSMUSG00000018882	Mrpl45
RPLP2	ribosomal protein, large, P2 [Source:HGNC Symbol;Acc:10377]	ENSG00000177600	ENSP00000322419	ENSMUSG00000118552	Rplp2-ps1
SRP19	signal recognition particle 19kDa [Source:HGNC Symbol;Acc:11300]	ENSG00000153037	ENSP00000424870	ENSMUSG00000014504	Srp19
RPS24	ribosomal protein S24 [Source:HGNC Symbol;Acc:10411]	ENSG00000138326	ENSP00000415549	ENSMUSG00000025290	Rps24
AKAP17A	A kinase (PRKA) anchor protein 17A [Source:HGNC Symbol;Acc:18783]	ENSG00000197976	ENSP00000324827	#N/A	#N/A
NXT2	nuclear transport factor 2-like export factor 2 [Source:HGNC Symbol;Acc:18151]	ENSG00000101888	ENSP00000361178	ENSMUSG00000042271	Nxt2
NXT1	NTF2-like export factor 1 [Source:HGNC Symbol;Acc:15913]	ENSG00000132661	ENSP00000254998	ENSMUSG00000036992	Nxt1
MRPL9	mitochondrial ribosomal protein L9 [Source:HGNC Symbol;Acc:14277]	ENSG00000143436	ENSP00000357823	ENSMUSG00000028140	Mrpl9
RPL27	ribosomal protein L27 [Source:HGNC Symbol;Acc:10328]	ENSG00000131469	ENSP00000253788	ENSMUSG00000063316	Rpl27
RPL24	ribosomal protein L24 [Source:HGNC Symbol;Acc:10325]	ENSG00000114391	ENSP00000377640	ENSMUSG00000098274	Rpl24
CNOT10	CCR4-NOT transcription complex, subunit 10 [Source:HGNC Symbol;Acc:23817]	ENSG00000182973	ENSP00000399862	ENSMUSG00000056167	Cnot10
ABT1	activator of basal transcription 1 [Source:HGNC Symbol;Acc:17369]	ENSG00000146109	ENSP00000274849	ENSMUSG00000036376	Abt1
DDX25	DEAD (Asp-Glu-Ala-Asp) box helicase 25 [Source:HGNC Symbol;Acc:18698]	ENSG00000109832	ENSP00000463333	ENSMUSG00000032101	Ddx25
DDX19A	DEAD (Asp-Glu-Ala-Asp) box polypeptide 19A [Source:HGNC Symbol;Acc:25628]	ENSG00000168872	ENSP00000399208	ENSMUSG00000015023	Ddx19a
DDX19B	Uncharacterized protein [Source:UniProtKB/TrEMBL;Acc:H3BN59]	ENSG00000260537	ENSP00000454699	ENSMUSG00000033658	Ddx19b
MRPS30	mitochondrial ribosomal protein S30 [Source:HGNC Symbol;Acc:8769]	ENSG00000112996	ENSP00000424328	ENSMUSG00000021731	Mrps30
SMG1	smg-1 homolog, phosphatidylinositol 3-kinase-related kinase (C. elegans) [Source:HGNC Symbol;Acc:30045]	ENSG00000157106	ENSP00000402515	ENSMUSG00000030655	Smg1
EXOSC5	exosome component 5 [Source:HGNC Symbol;Acc:24662]	ENSG00000077348	ENSP00000471002	ENSMUSG00000061286	Exosc5
AIMP2	aminoacyl tRNA synthetase complex-interacting multifunctional protein 2 [Source:HGNC Symbol;Acc:20609]	ENSG00000106305	ENSP00000223029	ENSMUSG00000029610	Aimp2
BZW2	basic leucine zipper and W2 domains 2 [Source:HGNC Symbol;Acc:18808]	ENSG00000136261	ENSP00000385577	ENSMUSG00000020547	Bzw2
BZW1	basic leucine zipper and W2 domains 1 [Source:HGNC Symbol;Acc:18380]	ENSG00000082153	ENSP00000395673	ENSMUSG00000051223	Bzw1
PARS2	prolyl-tRNA synthetase 2, mitochondrial (putative) [Source:HGNC Symbol;Acc:30563]	ENSG00000162396	ENSP00000360327	ENSMUSG00000043572	Pars2
INTS12	integrator complex subunit 12 [Source:HGNC Symbol;Acc:25067] [Type: protein coding Ensembl/Havana merge]	ENSG00000138785	ENSP00000415433	ENSMUSG00000028016	Ints12
EIF3H	eukaryotic translation initiation factor 3, subunit H [Source:HGNC Symbol;Acc:3273]	ENSG00000147677	ENSP00000429931	ENSMUSG00000022312	Eif3h
SKIV2L	superkiller viralicidic activity 2-like (S. cerevisiae) [Source:HGNC Symbol;Acc:10898]	ENSG00000223493	ENSP00000412310	ENSMUSG00000040356	Skiv2l
RC3H2	ring finger and CCCH-type domains 2 [Source:HGNC Symbol;Acc:21461]	ENSG00000056586	ENSP00000411767	ENSMUSG00000075376	Rc3h2
RC3H1	ring finger and CCCH-type domains 1 [Source:HGNC Symbol;Acc:29434]	ENSG00000135870	ENSP00000356667	ENSMUSG00000040423	Rc3h1
ZFP36	ZFP36 ring finger protein [Source:HGNC Symbol;Acc:12862]	ENSG00000128016	ENSP00000248673	ENSMUSG00000044786	Zfp36
ZFP36L1	ZFP36 ring finger protein-like 1 [Source:HGNC Symbol;Acc:1107]	ENSG00000185650	ENSP00000450784	ENSMUSG00000021127	Zfp36l1
ZFP36L2	ZFP36 ring finger protein-like 2 [Source:HGNC Symbol;Acc:1108]	ENSG00000152518	ENSP00000282388	ENSMUSG00000045817	Zfp36l2
ANKHD1	ankyrin repeat and KH domain containing 1 [Source:HGNC Symbol;Acc:24714]	ENSG00000131503	ENSP00000354085	ENSMUSG00000117942	Maskbp3
ANKRD17	ankyrin repeat domain 17 [Source:HGNC Symbol;Acc:23575]	ENSG00000132466	ENSP00000351416	ENSMUSG00000055204	Ankrd17
HELZ2	helicase with zinc finger 2, transcriptional coactivator [Source:HGNC Symbol;Acc:30021]	ENSG00000130589	ENSP00000393257	ENSMUSG00000027580	Helz2
UPF1	UPF1 regulator of nonsense transcripts homolog (yeast) [Source:HGNC Symbol;Acc:9962]	ENSG00000005007	ENSP00000262803	ENSMUSG00000058301	Upf1
DROSHA	drosha, ribonuclease type III [Source:HGNC Symbol;Acc:17904]	ENSG00000113360	ENSP00000409335	ENSMUSG00000022191	Drosha
MRPL37	mitochondrial ribosomal protein L37 [Source:HGNC Symbol;Acc:14034]	ENSG00000116221	ENSP00000354086	ENSMUSG00000028622	Mrpl37
PUS10	pseudouridylate synthase 10 [Source:HGNC Symbol;Acc:26505]	ENSG00000162927	ENSP00000326003	ENSMUSG00000020280	Pus10
NUDT16	nudix (nucleoside diphosphate linked moiety X)-type motif 16 [Source:HGNC Symbol;Acc:26442]	ENSG00000198585	ENSP00000429274	ENSMUSG00000032566	Nudt16l2
NUDT16L1	nudix (nucleoside diphosphate linked moiety X)-type motif 16-like 1 [Source:HGNC Symbol;Acc:28154]	ENSG00000168101	ENSP00000306670	ENSMUSG00000022516	Nudt16l1
TRMT11	tRNA methyltransferase 11 homolog (S. cerevisiae) [Source:HGNC Symbol;Acc:21080]	ENSG00000066651	ENSP00000333934	ENSMUSG00000019792	Trmt11
PET112	PET112 homolog (yeast) [Source:HGNC Symbol;Acc:8849]	ENSG00000059691	ENSP00000426859	ENSMUSG00000028085	Gatb
NUFIP1	nuclear fragile X mental retardation protein interacting protein 1 [Source:HGNC Symbol;Acc:8057]	ENSG00000083635	ENSP00000368459	ENSMUSG00000022009	Nufip1
PURA	purine-rich element binding protein A [Source:HGNC Symbol;Acc:9701]	ENSG00000185129	ENSP00000332706	ENSMUSG00000043991	Pura
PURB	purine-rich element binding protein B [Source:HGNC Symbol;Acc:9702]	ENSG00000146676	ENSP00000379051	ENSMUSG00000094483	Purb
PURG	purine-rich element binding protein G [Source:HGNC Symbol;Acc:17930]	ENSG00000172733	ENSP00000345168	ENSMUSG00000049184	Purg
ZRANB2	zinc finger, RAN-binding domain containing 2 [Source:HGNC Symbol;Acc:13058]	ENSG00000132485	ENSP00000254821	ENSMUSG00000028180	Zranb2
THOC5	THO complex 5 [Source:HGNC Symbol;Acc:19074]	ENSG00000100296	ENSP00000420306	ENSMUSG00000034274	Thoc5
TSEN54	tRNA splicing endonuclease 54 homolog (S. cerevisiae) [Source:HGNC Symbol;Acc:27561]	ENSG00000182173	ENSP00000327487	ENSMUSG00000020781	Tsen54
SRP9	signal recognition particle 9kDa [Source:HGNC Symbol;Acc:11304]	ENSG00000143742	ENSP00000355803	ENSMUSG00000026511	Srp9
PIN4	protein (peptidylprolyl cis/trans isomerase) NIMA-interacting, 4 (parvulin) [Source:HGNC Symbol;Acc:8992]	ENSG00000102309	ENSP00000362773	ENSMUSG00000079480	Pin4
ZC3H14	zinc finger CCCH-type containing 14 [Source:HGNC Symbol;Acc:20509]	ENSG00000100722	ENSP00000452370	ENSMUSG00000021012	Zc3h14
CNOT2	CCR4-NOT transcription complex, subunit 2 [Source:HGNC Symbol;Acc:7878]	ENSG00000111596	ENSP00000446507	ENSMUSG00000020166	Cnot2
TARBP1	TAR (HIV-1) RNA binding protein 1 [Source:HGNC Symbol;Acc:11568]	ENSG00000059588	ENSP00000040877	ENSMUSG00000090290	Tarbp1
AGO1	eukaryotic translation initiation factor 2C, 1 [Source:HGNC Symbol;Acc:3262]	ENSG00000092847	ENSP00000362300	ENSMUSG00000041530	Ago1
AGO2	eukaryotic translation initiation factor 2C, 2 [Source:HGNC Symbol;Acc:3263]	ENSG00000123908	ENSP00000220592	ENSMUSG00000036698	Ago2
AGO3	eukaryotic translation initiation factor 2C, 3 [Source:HGNC Symbol;Acc:18421]	ENSG00000126070	ENSP00000362287	ENSMUSG00000028842	Ago3
AGO4	eukaryotic translation initiation factor 2C, 4 [Source:HGNC Symbol;Acc:18424]	ENSG00000134698	ENSP00000362306	ENSMUSG00000042500	Ago4
LARP4B	La ribonucleoprotein domain family, member 4B [Source:HGNC Symbol;Acc:28987]	ENSG00000107929	ENSP00000326128	ENSMUSG00000033499	Larp4b
LARP4	La ribonucleoprotein domain family, member 4 [Source:HGNC Symbol;Acc:24320]	ENSG00000161813	ENSP00000293618	ENSMUSG00000023025	Larp4
SNW1	SNW domain containing 1 [Source:HGNC Symbol;Acc:16696] [Type: protein coding Ensembl/Havana merge]	ENSG00000100603	ENSP00000261531	ENSMUSG00000021039	Snw1
EZH2	enhancer of zeste homolog 2 (Drosophila) [Source:HGNC Symbol;Acc:3527]	ENSG00000106462	ENSP00000320147	ENSMUSG00000029687	Ezh2
EIF3B	eukaryotic translation initiation factor 3, subunit B [Source:HGNC Symbol;Acc:3280]	ENSG00000106263	ENSP00000354125	ENSMUSG00000056076	Eif3b
RPP30	ribonuclease P/MRP 30kDa subunit [Source:HGNC Symbol;Acc:17688]	ENSG00000148688	ENSP00000389182	ENSMUSG00000024800	Rpp30
ZMAT3	zinc finger, matrin-type 3 [Source:HGNC Symbol;Acc:29983]	ENSG00000172667	ENSP00000311221	ENSMUSG00000027663	Zmat3
PTGES3	prostaglandin E synthase 3 (cytosolic) [Source:HGNC Symbol;Acc:16049]	ENSG00000110958	ENSP00000262033	ENSMUSG00000071072	Ptges3
KARS	lysyl-tRNA synthetase [Source:HGNC Symbol;Acc:6215]	ENSG00000065427	ENSP00000462057	ENSMUSG00000031948	Kars
RAN	RAN, member RAS oncogene family [Source:HGNC Symbol;Acc:9846]	ENSG00000132341	ENSP00000446215	ENSMUSG00000029430	Ran
SNRPA	small nuclear ribonucleoprotein polypeptide A [Source:HGNC Symbol;Acc:11151]	ENSG00000077312	ENSP00000243563	ENSMUSG00000061479	Snrpa
SNRPB2	small nuclear ribonucleoprotein polypeptide B [Source:HGNC Symbol;Acc:11155]	ENSG00000125870	ENSP00000246071	ENSMUSG00000008333	Snrpb2
HEATR1	HEAT repeat containing 1 [Source:HGNC Symbol;Acc:25517]	ENSG00000119285	ENSP00000355541	ENSMUSG00000050244	Heatr1
PTGES3L-AARSD1	PTGES3L-AARSD1 readthrough [Source:HGNC Symbol;Acc:43946]	ENSG00000108825	ENSP00000409924	ENSMUSG00000097239	Gm27029
AARSD1	alanyl-tRNA synthetase domain containing 1 [Source:HGNC Symbol;Acc:28417]	ENSG00000266967	ENSP00000400870	ENSMUSG00000097239	Gm27029
CPSF3	cleavage and polyadenylation specific factor 3, 73kDa [Source:HGNC Symbol;Acc:2326]	ENSG00000119203	ENSP00000238112	ENSMUSG00000054309	Cpsf3
CPSF3L	cleavage and polyadenylation specific factor 3-like [Source:HGNC Symbol;Acc:26052]	ENSG00000127054	ENSP00000392848	ENSMUSG00000029034	Ints11
CWC25	CWC25 spliceosome-associated protein homolog (S. cerevisiae) [Source:HGNC Symbol;Acc:25989]	ENSG00000108296	ENSP00000225428	ENSMUSG00000018541	Cwc25
RPS5	ribosomal protein S5 [Source:HGNC Symbol;Acc:10426]	ENSG00000083845	ENSP00000196551	ENSMUSG00000012848	Rps5
POLR2D	polymerase (RNA) II (DNA directed) polypeptide D [Source:HGNC Symbol;Acc:9191]	ENSG00000144231	ENSP00000272645	ENSMUSG00000024258	Polr2d
C9orf114	chromosome 9 open reading frame 114 [Source:HGNC Symbol;Acc:26933]	ENSG00000198917	ENSP00000354812	ENSMUSG00000039660	Spout1
MRPL44	mitochondrial ribosomal protein L44 [Source:HGNC Symbol;Acc:16650]	ENSG00000135900	ENSP00000258383	ENSMUSG00000026248	Mrpl44
ETF1	eukaryotic translation termination factor 1 [Source:HGNC Symbol;Acc:3477]	ENSG00000120705	ENSP00000353741	ENSMUSG00000024360	Etf1
GAR1	GAR1 ribonucleoprotein homolog (yeast) [Source:HGNC Symbol;Acc:14264]	ENSG00000109534	ENSP00000226796	ENSMUSG00000028010	Gar1
MVP	major vault protein [Source:HGNC Symbol;Acc:7531]	ENSG00000013364	ENSP00000378760	ENSMUSG00000030681	Mvp
RPF2	ribosome production factor 2 homolog (S. cerevisiae) [Source:HGNC Symbol;Acc:20870]	ENSG00000197498	ENSP00000402338	ENSMUSG00000038510	Rpf2
ZC3H18	zinc finger CCCH-type containing 18 [Source:HGNC Symbol;Acc:25091]	ENSG00000158545	ENSP00000455260	ENSMUSG00000017478	Zc3h18
INTS5	integrator complex subunit 5 [Source:HGNC Symbol;Acc:29352]	ENSG00000185085	ENSP00000327889	ENSMUSG00000071652	Ints5
INTS3	integrator complex subunit 3 [Source:HGNC Symbol;Acc:26153]	ENSG00000143624	ENSP00000398222	ENSMUSG00000027933	Ints3
LSM6	LSM6 homolog, U6 small nuclear RNA associated (S. cerevisiae) [Source:HGNC Symbol;Acc:17017]	ENSG00000164167	ENSP00000296581	ENSMUSG00000031683	Lsm6
SNRPF	small nuclear ribonucleoprotein polypeptide F [Source:HGNC Symbol;Acc:11162]	ENSG00000139343	ENSP00000447751	ENSMUSG00000020018	Snrpf
TUT1	terminal uridylyl transferase 1, U6 snRNA-specific [Source:HGNC Symbol;Acc:26184]	ENSG00000149016	ENSP00000308000	ENSMUSG00000071645	Tut1
MTPAP	mitochondrial poly(A) polymerase [Source:HGNC Symbol;Acc:25532]	ENSG00000107951	ENSP00000350820	ENSMUSG00000024234	Mtpap
EIF2AK1	eukaryotic translation initiation factor 2-alpha kinase 1 [Source:HGNC Symbol;Acc:24921]	ENSG00000086232	ENSP00000199389	ENSMUSG00000029613	Eif2ak1
EIF2AK2	eukaryotic translation initiation factor 2-alpha kinase 2 [Source:HGNC Symbol;Acc:9437]	ENSG00000055332	ENSP00000233057	ENSMUSG00000024079	Eif2ak2
EIF2AK3	eukaryotic translation initiation factor 2-alpha kinase 3 [Source:HGNC Symbol;Acc:3255]	ENSG00000172071	ENSP00000307235	ENSMUSG00000031668	Eif2ak3
EIF2AK4	eukaryotic translation initiation factor 2 alpha kinase 4 [Source:HGNC Symbol;Acc:19687]	ENSG00000128829	ENSP00000263791	ENSMUSG00000005102	Eif2ak4
MRPL22	mitochondrial ribosomal protein L22 [Source:HGNC Symbol;Acc:14480]	ENSG00000082515	ENSP00000429039	ENSMUSG00000020514	Mrpl22
PES1	pescadillo ribosomal biogenesis factor 1 [Source:HGNC Symbol;Acc:8848]	ENSG00000100029	ENSP00000384252	ENSMUSG00000020430	Pes1
LSM7	LSM7 homolog, U6 small nuclear RNA associated (S. cerevisiae) [Source:HGNC Symbol;Acc:20470]	ENSG00000130332	ENSP00000252622	ENSMUSG00000035215	Lsm7
PAPD4	PAP associated domain containing 4 [Source:HGNC Symbol;Acc:26776]	ENSG00000164329	ENSP00000397563	ENSMUSG00000042167	Tent2
ZCCHC11	zinc finger, CCHC domain containing 11 [Source:HGNC Symbol;Acc:28981]	ENSG00000134744	ENSP00000257177	ENSMUSG00000034610	Tut4
ZCCHC6	zinc finger, CCHC domain containing 6 [Source:HGNC Symbol;Acc:25817]	ENSG00000083223	ENSP00000365130	ENSMUSG00000035248	Tut7
KHDRBS1	KH domain containing, RNA binding, signal transduction associated 1 [Source:HGNC Symbol;Acc:18116]	ENSG00000121774	ENSP00000313829	ENSMUSG00000028790	Khdrbs1
KHDRBS2	KH domain containing, RNA binding, signal transduction associated 2 [Source:HGNC Symbol;Acc:18114]	ENSG00000112232	ENSP00000281156	ENSMUSG00000026058	Khdrbs2
KHDRBS3	KH domain containing, RNA binding, signal transduction associated 3 [Source:HGNC Symbol;Acc:18117]	ENSG00000131773	ENSP00000431022	ENSMUSG00000022332	Khdrbs3
QKI	QKI, KH domain containing, RNA binding [Source:HGNC Symbol;Acc:21100]	ENSG00000112531	ENSP00000275262	ENSMUSG00000062078	Qk
SF1	splicing factor 1 [Source:HGNC Symbol;Acc:12950]	ENSG00000168066	ENSP00000396793	ENSMUSG00000024949	Sf1
LRRC47	leucine rich repeat containing 47 [Source:HGNC Symbol;Acc:29207]	ENSG00000130764	ENSP00000367498	ENSMUSG00000029028	Lrrc47
ISY1	ISY1 splicing factor homolog (S. cerevisiae) [Source:HGNC Symbol;Acc:29201]	ENSG00000240682	ENSP00000376973	ENSMUSG00000030056	Isy1
SRRM1	serine/arginine repetitive matrix 1 [Source:HGNC Symbol;Acc:16638]	ENSG00000133226	ENSP00000469151	ENSMUSG00000028809	Srrm1
IPO9	importin 9 [Source:HGNC Symbol;Acc:19425]	ENSG00000198700	ENSP00000354742	ENSMUSG00000041879	Ipo9
MTRF1	mitochondrial translational release factor 1 [Source:HGNC Symbol;Acc:7469]	ENSG00000120662	ENSP00000400031	ENSMUSG00000022022	Mtrf1
MTRF1L	mitochondrial translational release factor 1-like [Source:HGNC Symbol;Acc:21051]	ENSG00000112031	ENSP00000356202	ENSMUSG00000019774	Mtrf1l
WIBG	within bgcn homolog (Drosophila) [Source:HGNC Symbol;Acc:30258]	ENSG00000170473	ENSP00000381271	ENSMUSG00000064030	Pym1
PPAN	peter pan homolog (Drosophila) [Source:HGNC Symbol;Acc:9227]	ENSG00000130810	ENSP00000450710	ENSMUSG00000004100	Ppan
FUBP3	far upstream element (FUSE) binding protein 3 [Source:HGNC Symbol;Acc:4005]	ENSG00000107164	ENSP00000318177	ENSMUSG00000026843	Fubp3
FUBP1	far upstream element (FUSE) binding protein 1 [Source:HGNC Symbol;Acc:4004]	ENSG00000162613	ENSP00000389536	ENSMUSG00000028034	Fubp1
KHSRP	KH-type splicing regulatory protein [Source:HGNC Symbol;Acc:6316]	ENSG00000088247	ENSP00000381216	ENSMUSG00000007670	Khsrp
CHTOP	chromatin target of PRMT1 [Source:HGNC Symbol;Acc:24511] [Type: protein coding Ensembl/Havana merge]	ENSG00000160679	ENSP00000357683	ENSMUSG00000001017	Chtop
PTCD2	pentatricopeptide repeat domain 2 [Source:HGNC Symbol;Acc:25734]	ENSG00000049883	ENSP00000370013	ENSMUSG00000021650	Ptcd2
POLR2A	polymerase (RNA) II (DNA directed) polypeptide A, 220kDa [Source:HGNC Symbol;Acc:9187]	ENSG00000181222	ENSP00000314949	ENSMUSG00000005198	Polr2a
MRPL43	mitochondrial ribosomal protein L43 [Source:HGNC Symbol;Acc:14517]	ENSG00000055950	ENSP00000359256	ENSMUSG00000025208	Mrpl43
DDX55	DEAD (Asp-Glu-Ala-Asp) box polypeptide 55 [Source:HGNC Symbol;Acc:20085]	ENSG00000111364	ENSP00000238146	ENSMUSG00000029389	Ddx55
RPS15	ribosomal protein S15 [Source:HGNC Symbol;Acc:10388]	ENSG00000115268	ENSP00000465055	ENSMUSG00000063457	Rps15
CPSF4	cleavage and polyadenylation specific factor 4, 30kDa [Source:HGNC Symbol;Acc:2327]	ENSG00000160917	ENSP00000402224	ENSMUSG00000029625	Cpsf4
CPSF4L	cleavage and polyadenylation specific factor 4-like [Source:HGNC Symbol;Acc:33632]	ENSG00000187959	ENSP00000380788	ENSMUSG00000018727	Cpsf4l
CSTF2	cleavage stimulation factor, 3' pre-RNA, subunit 2, 64kDa [Source:HGNC Symbol;Acc:2484]	ENSG00000101811	ENSP00000387996	ENSMUSG00000031256	Cstf2
CSTF2T	cleavage stimulation factor, 3' pre-RNA, subunit 2, 64kDa, tau variant [Source:HGNC Symbol;Acc:17086]	ENSG00000177613	ENSP00000332444	ENSMUSG00000053536	Cstf2t
RAVER2	ribonucleoprotein, PTB-binding 2 [Source:HGNC Symbol;Acc:25577]	ENSG00000162437	ENSP00000294428	ENSMUSG00000035275	Raver2
RAVER1	ribonucleoprotein, PTB-binding 1 [Source:HGNC Symbol;Acc:30296]	ENSG00000161847	ENSP00000293677	ENSMUSG00000010205	Raver1
EIF1AX	eukaryotic translation initiation factor 1A, X-linked [Source:HGNC Symbol;Acc:3250]	ENSG00000173674	ENSP00000368927	ENSMUSG00000067194	Eif1ax
EIF1AY	eukaryotic translation initiation factor 1A, Y-linked [Source:HGNC Symbol;Acc:3252]	ENSG00000198692	ENSP00000354722	ENSMUSG00000096619	Eif1ad14
DALRD3	DALR anticodon binding domain containing 3 [Source:HGNC Symbol;Acc:25536]	ENSG00000178149	ENSP00000396650	ENSMUSG00000019039	Dalrd3
NSUN2	NOP2/Sun RNA methyltransferase family, member 2 [Source:HGNC Symbol;Acc:25994]	ENSG00000037474	ENSP00000420957	ENSMUSG00000021595	Nsun2
URB2	URB2 ribosome biogenesis 2 homolog (S. cerevisiae) [Source:HGNC Symbol;Acc:28967]	ENSG00000135763	ENSP00000258243	ENSMUSG00000031976	Urb2
PHAX	phosphorylated adaptor for RNA export [Source:HGNC Symbol;Acc:10241]	ENSG00000164902	ENSP00000297540	ENSMUSG00000008301	Phax
PPARGC1A	peroxisome proliferator-activated receptor gamma, coactivator 1 alpha [Source:HGNC Symbol;Acc:9237]	ENSG00000109819	ENSP00000264867	ENSMUSG00000029167	Ppargc1a
PPARGC1B	peroxisome proliferator-activated receptor gamma, coactivator 1 beta [Source:HGNC Symbol;Acc:30022]	ENSG00000155846	ENSP00000312649	ENSMUSG00000033871	Ppargc1b
PPRC1	peroxisome proliferator-activated receptor gamma, coactivator-related 1 [Source:HGNC Symbol;Acc:30025]	ENSG00000148840	ENSP00000359029	ENSMUSG00000055491	Pprc1
PHF5A	PHD finger protein 5A [Source:HGNC Symbol;Acc:18000]	ENSG00000100410	ENSP00000216252	ENSMUSG00000061360	Phf5a
MCTS1	malignant T cell amplified sequence 1 [Source:HGNC Symbol;Acc:23357]	ENSG00000232119	ENSP00000360367	ENSMUSG00000000355	Mcts1
RRP7A	ribosomal RNA processing 7 homolog A (S. cerevisiae) [Source:HGNC Symbol;Acc:24286]	ENSG00000189306	ENSP00000321449	ENSMUSG00000018040	Rrp7a
DGCR8	DiGeorge syndrome critical region gene 8 [Source:HGNC Symbol;Acc:2847]	ENSG00000128191	ENSP00000263209	ENSMUSG00000022718	Dgcr8
ZC3H13	zinc finger CCCH-type containing 13 [Source:HGNC Symbol;Acc:20368]	ENSG00000123200	ENSP00000282007	ENSMUSG00000022000	Zc3h13
UPF3A	UPF3 regulator of nonsense transcripts homolog A (yeast) [Source:HGNC Symbol;Acc:20332]	ENSG00000169062	ENSP00000364448	ENSMUSG00000038398	Upf3a
UPF3B	UPF3 regulator of nonsense transcripts homolog B (yeast) [Source:HGNC Symbol;Acc:20439]	ENSG00000125351	ENSP00000245418	ENSMUSG00000036572	Upf3b
RBM24	RNA binding motif protein 24 [Source:HGNC Symbol;Acc:21539]	ENSG00000112183	ENSP00000426222	ENSMUSG00000038132	Rbm24
RBM38	RNA binding motif protein 38 [Source:HGNC Symbol;Acc:15818]	ENSG00000132819	ENSP00000407848	ENSMUSG00000027510	Rbm38
THOC3	THO complex 3 [Source:HGNC Symbol;Acc:19072]	ENSG00000051596	ENSP00000265097	ENSMUSG00000025872	Thoc3
IGHMBP2	immunoglobulin mu binding protein 2 [Source:HGNC Symbol;Acc:5542]	ENSG00000132740	ENSP00000255078	ENSMUSG00000024831	Ighmbp2
PAPD5	PAP associated domain containing 5 [Source:HGNC Symbol;Acc:30758]	ENSG00000121274	ENSP00000396995	ENSMUSG00000036779	Tent4b
PAPD7	PAP associated domain containing 7 [Source:HGNC Symbol;Acc:16705]	ENSG00000112941	ENSP00000230859	ENSMUSG00000034575	Tent4a
GFM2	G elongation factor, mitochondrial 2 [Source:HGNC Symbol;Acc:29682]	ENSG00000164347	ENSP00000427004	ENSMUSG00000021666	Gfm2
PHRF1	PHD and ring finger domains 1 [Source:HGNC Symbol;Acc:24351] [Type: protein coding Ensembl/Havana merge]	ENSG00000070047	ENSP00000410626	ENSMUSG00000038611	Phrf1
VARS	valyl-tRNA synthetase [Source:HGNC Symbol;Acc:12651]	ENSG00000096171	ENSP00000211402	ENSMUSG00000007029	Vars
VARS2	valyl-tRNA synthetase 2, mitochondrial [Source:HGNC Symbol;Acc:21642]	ENSG00000137411	ENSP00000316092	ENSMUSG00000038838	Vars2
MRPL1	mitochondrial ribosomal protein L1 [Source:HGNC Symbol;Acc:14275]	ENSG00000169288	ENSP00000426575	ENSMUSG00000029486	Mrpl1
INTS7	integrator complex subunit 7 [Source:HGNC Symbol;Acc:24484] [Type: protein coding Ensembl/Havana merge]	ENSG00000143493	ENSP00000355961	ENSMUSG00000037461	Ints7
ATXN2L	ataxin 2-like [Source:HGNC Symbol;Acc:31326]	ENSG00000168488	ENSP00000372133	ENSMUSG00000032637	Atxn2l
ATXN2	ataxin 2 [Source:HGNC Symbol;Acc:10555]	ENSG00000204842	ENSP00000445583	ENSMUSG00000042605	Atxn2
PPIL4	peptidylprolyl isomerase (cyclophilin)-like 4 [Source:HGNC Symbol;Acc:15702]	ENSG00000131013	ENSP00000253329	ENSMUSG00000015757	Ppil4
PPIL3	peptidylprolyl isomerase (cyclophilin)-like 3 [Source:HGNC Symbol;Acc:9262]	ENSG00000240344	ENSP00000286175	ENSMUSG00000026035	Ppil3
PPWD1	peptidylprolyl isomerase domain and WD repeat containing 1 [Source:HGNC Symbol;Acc:28954]	ENSG00000113593	ENSP00000261308	ENSMUSG00000021713	Ppwd1
CWC27	CWC27 spliceosome-associated protein homolog (S. cerevisiae) [Source:HGNC Symbol;Acc:10664]	ENSG00000153015	ENSP00000370460	ENSMUSG00000021715	Cwc27
PPIH	peptidylprolyl isomerase H (cyclophilin H) [Source:HGNC Symbol;Acc:14651]	ENSG00000171960	ENSP00000306614	ENSMUSG00000033036	Gm7879
NUTF2	nuclear transport factor 2 [Source:HGNC Symbol;Acc:13722]	ENSG00000102898	ENSP00000457022	ENSMUSG00000008450	Nutf2
MRPL18	mitochondrial ribosomal protein L18 [Source:HGNC Symbol;Acc:14477]	ENSG00000112110	ENSP00000356001	ENSMUSG00000057388	Mrpl18
LSM11	LSM11, U7 small nuclear RNA associated [Source:HGNC Symbol;Acc:30860]	ENSG00000155858	ENSP00000286307	ENSMUSG00000044847	Lsm11
AARS2	alanyl-tRNA synthetase 2, mitochondrial [Source:HGNC Symbol;Acc:21022]	ENSG00000124608	ENSP00000244571	ENSMUSG00000023938	Aars2
AARS	alanyl-tRNA synthetase [Source:HGNC Symbol;Acc:20]	ENSG00000090861	ENSP00000261772	ENSMUSG00000031960	Aars
MIF4GD	MIF4G domain containing [Source:HGNC Symbol;Acc:24030]	ENSG00000125457	ENSP00000463493	ENSMUSG00000020743	Mif4gd
CTIF	CBP80/20-dependent translation initiation factor [Source:HGNC Symbol;Acc:23925]	ENSG00000134030	ENSP00000372459	ENSMUSG00000052928	Ctif
C9orf129	chromosome 9 open reading frame 129 [Source:HGNC Symbol;Acc:31116]	ENSG00000204352	ENSP00000364568	#N/A	#N/A
LUC7L2	C7orf55-LUC7L2 protein [Source:RefSeq peptide;Acc:NP_001231513]	ENSG00000269955	ENSP00000440222	ENSMUSG00000029823	Luc7l2
LUC7L3	LUC7-like 3 (S. cerevisiae) [Source:HGNC Symbol;Acc:24309]	ENSG00000108848	ENSP00000376919	ENSMUSG00000020863	Luc7l3
LUC7L	LUC7-like (S. cerevisiae) [Source:HGNC Symbol;Acc:6723]	ENSG00000007392	ENSP00000293872	ENSMUSG00000024188	Luc7l
DUS2	dihydrouridine synthase 2-like, SMM1 homolog (S. cerevisiae) [Source:HGNC Symbol;Acc:26014]	ENSG00000167264	ENSP00000409498	ENSMUSG00000031901	Dus2
RNF17	ring finger protein 17 [Source:HGNC Symbol;Acc:10060]	ENSG00000132972	ENSP00000255324	ENSMUSG00000000365	Rnf17
TDRD1	tudor domain containing 1 [Source:HGNC Symbol;Acc:11712]	ENSG00000095627	ENSP00000358288	ENSMUSG00000025081	Tdrd1
MRPS10	mitochondrial ribosomal protein S10 [Source:HGNC Symbol;Acc:14502]	ENSG00000048544	ENSP00000053468	ENSMUSG00000034729	Mrps10
FAM103A1	family with sequence similarity 103, member A1 [Source:HGNC Symbol;Acc:31022]	ENSG00000169612	ENSP00000307181	ENSMUSG00000038646	Ramac
ENOX1	ecto-NOX disulfide-thiol exchanger 1 [Source:HGNC Symbol;Acc:25474]	ENSG00000120658	ENSP00000415054	ENSMUSG00000022012	Enox1
ENOX2	ecto-NOX disulfide-thiol exchanger 2 [Source:HGNC Symbol;Acc:2259]	ENSG00000165675	ENSP00000359965	ENSMUSG00000031109	Enox2
RBPMS	RNA binding protein with multiple splicing [Source:HGNC Symbol;Acc:19097]	ENSG00000157110	ENSP00000318102	ENSMUSG00000031586	Rbpms
RBPMS2	RNA binding protein with multiple splicing 2 [Source:HGNC Symbol;Acc:19098]	ENSG00000166831	ENSP00000300069	ENSMUSG00000032387	Rbpms2
NIP7	nuclear import 7 homolog (S. cerevisiae) [Source:HGNC Symbol;Acc:24328]	ENSG00000132603	ENSP00000464159	ENSMUSG00000031917	Nip7
RPL3	ribosomal protein L3 [Source:HGNC Symbol;Acc:10332]	ENSG00000100316	ENSP00000386101	ENSMUSG00000060036	Rpl3
RPL3L	ribosomal protein L3-like [Source:HGNC Symbol;Acc:10351]	ENSG00000140986	ENSP00000268661	ENSMUSG00000002500	Rpl3l
RNASE11	ribonuclease, RNase A family, 11 (non-active) [Source:HGNC Symbol;Acc:19269]	ENSG00000173464	ENSP00000381093	ENSMUSG00000059648	Rnase11
RNASE12	Probable inactive ribonuclease-like protein 12 [Source:UniProtKB/Swiss-Prot;Acc:Q5GAN4]	ENSG00000258436	ENSP00000450580	ENSMUSG00000068407	Rnase12
RPLP0	ribosomal protein, large, P0 [Source:HGNC Symbol;Acc:10371]	ENSG00000089157	ENSP00000366471	ENSMUSG00000067274	Rplp0
RBM34	RNA binding motif protein 34 [Source:HGNC Symbol;Acc:28965]	ENSG00000188739	ENSP00000355565	ENSMUSG00000033931	Rbm34
CMTR2	cap methyltransferase 2 [Source:HGNC Symbol;Acc:25635]	ENSG00000180917	ENSP00000411148	ENSMUSG00000046441	Cmtr2
ENDOU	endonuclease, polyU-specific [Source:HGNC Symbol;Acc:14369]	ENSG00000111405	ENSP00000397679	ENSMUSG00000022468	Endou
PUM1	pumilio homolog 1 (Drosophila) [Source:HGNC Symbol;Acc:14957]	ENSG00000134644	ENSP00000433850	ENSMUSG00000028580	Pum1
PUM2	pumilio homolog 2 (Drosophila) [Source:HGNC Symbol;Acc:14958]	ENSG00000055917	ENSP00000385992	ENSMUSG00000020594	Pum2
TYW5	tRNA-yW synthesizing protein 5 [Source:HGNC Symbol;Acc:26754]	ENSG00000162971	ENSP00000346627	ENSMUSG00000048495	Tyw5
TYW3	tRNA-yW synthesizing protein 3 homolog (S. cerevisiae) [Source:HGNC Symbol;Acc:24757]	ENSG00000162623	ENSP00000359904	ENSMUSG00000047583	Tyw3
TRMT1	tRNA methyltransferase 1 homolog (S. cerevisiae) [Source:HGNC Symbol;Acc:25980]	ENSG00000104907	ENSP00000466967	ENSMUSG00000001909	Trmt1
RAE1	RAE1 RNA export 1 homolog (S. pombe) [Source:HGNC Symbol;Acc:9828]	ENSG00000101146	ENSP00000379182	ENSMUSG00000027509	Rae1
SLU7	SLU7 splicing factor homolog (S. cerevisiae) [Source:HGNC Symbol;Acc:16939]	ENSG00000164609	ENSP00000297151	ENSMUSG00000020409	Slu7
EIF2B4	eukaryotic translation initiation factor 2B, subunit 4 delta, 67kDa [Source:HGNC Symbol;Acc:3260]	ENSG00000115211	ENSP00000394397	ENSMUSG00000029145	Eif2b4
EIF5B	eukaryotic translation initiation factor 5B [Source:HGNC Symbol;Acc:30793]	ENSG00000158417	ENSP00000289371	ENSMUSG00000026083	Eif5b
GPATCH1	G patch domain containing 1 [Source:HGNC Symbol;Acc:24658]	ENSG00000076650	ENSP00000170564	ENSMUSG00000063808	Gpatch1
RPL36	ribosomal protein L36 [Source:HGNC Symbol;Acc:13631]	ENSG00000130255	ENSP00000464342	ENSMUSG00000057863	Rpl36
EEF1A1	eukaryotic translation elongation factor 1 alpha 1 [Source:HGNC Symbol;Acc:3189]	ENSG00000156508	ENSP00000339053	ENSMUSG00000037742	Eef1a1
EEF1A2	eukaryotic translation elongation factor 1 alpha 2 [Source:HGNC Symbol;Acc:3192]	ENSG00000101210	ENSP00000217182	ENSMUSG00000016349	Eef1a2
RRP8	ribosomal RNA processing 8, methyltransferase, homolog (yeast) [Source:HGNC Symbol;Acc:29030]	ENSG00000132275	ENSP00000254605	ENSMUSG00000030888	Rrp8
UBA52	ubiquitin A-52 residue ribosomal protein fusion product 1 [Source:HGNC Symbol;Acc:12458]	ENSG00000221983	ENSP00000472768	ENSMUSG00000090137	Uba52
R3HDM1	R3H domain containing 1 [Source:HGNC Symbol;Acc:9757]	ENSG00000048991	ENSP00000264160	ENSMUSG00000056211	R3hdm1
R3HDM2	R3H domain containing 2 [Source:HGNC Symbol;Acc:29167]	ENSG00000179912	ENSP00000385839	ENSMUSG00000025404	R3hdm2
PA2G4	proliferation-associated 2G4, 38kDa [Source:HGNC Symbol;Acc:8550]	ENSG00000170515	ENSP00000302886	ENSMUSG00000025364	Pa2g4
AAR2	AAR2 splicing factor homolog (S. cerevisiae) [Source:HGNC Symbol;Acc:15886]	ENSG00000131043	ENSP00000380455	ENSMUSG00000027628	Aar2
ERI1	exoribonuclease 1 [Source:HGNC Symbol;Acc:23994]	ENSG00000104626	ENSP00000430190	ENSMUSG00000031527	Eri1
ERI2	ERI1 exoribonuclease family member 2 [Source:HGNC Symbol;Acc:30541]	ENSG00000196678	ENSP00000454661	ENSMUSG00000030929	Eri2
ERI3	ERI1 exoribonuclease family member 3 [Source:HGNC Symbol;Acc:17276]	ENSG00000117419	ENSP00000438360	ENSMUSG00000033423	Eri3
NIFK	MKI67 (FHA domain) interacting nucleolar phosphoprotein [Source:HGNC Symbol;Acc:17838]	ENSG00000155438	ENSP00000285814	ENSMUSG00000026377	Nifk
METTL14	methyltransferase like 14 [Source:HGNC Symbol;Acc:29330]	ENSG00000145388	ENSP00000373474	ENSMUSG00000028114	Mettl14
MRPL32	mitochondrial ribosomal protein L32 [Source:HGNC Symbol;Acc:14035]	ENSG00000106591	ENSP00000223324	ENSMUSG00000015672	Mrpl32
CPSF6	cleavage and polyadenylation specific factor 6, 68kDa [Source:HGNC Symbol;Acc:13871]	ENSG00000111605	ENSP00000391774	ENSMUSG00000055531	Cpsf6
CPSF7	cleavage and polyadenylation specific factor 7, 59kDa [Source:HGNC Symbol;Acc:30098]	ENSG00000149532	ENSP00000391359	ENSMUSG00000034820	Cpsf7
RPL7A	ribosomal protein L7a [Source:HGNC Symbol;Acc:10364]	ENSG00000260501	ENSP00000455188	ENSMUSG00000062647	Rpl7a
WDR46	WD repeat domain 46 [Source:HGNC Symbol;Acc:13923]	ENSG00000227057	ENSP00000363746	ENSMUSG00000024312	Wdr46
SRP14	signal recognition particle 14kDa (homologous Alu RNA binding protein) [Source:HGNC Symbol;Acc:11299]	ENSG00000140319	ENSP00000267884	ENSMUSG00000009549	Srp14
TFAM	transcription factor A, mitochondrial [Source:HGNC Symbol;Acc:11741]	ENSG00000108064	ENSP00000420588	ENSMUSG00000003923	Tfam
CMSS1	cms1 ribosomal small subunit homolog (yeast) [Source:HGNC Symbol;Acc:28666]	ENSG00000184220	ENSP00000410396	ENSMUSG00000022748	Cmss1
XPO6	exportin 6 [Source:HGNC Symbol;Acc:19733]	ENSG00000169180	ENSP00000302790	ENSMUSG00000000131	Xpo6
EXOSC1	exosome component 1 [Source:HGNC Symbol;Acc:17286]	ENSG00000171311	ENSP00000473303	ENSMUSG00000034321	Exosc1
ZNF106	zinc finger protein 106 [Source:HGNC Symbol;Acc:12886]	ENSG00000103994	ENSP00000454882	ENSMUSG00000027288	Zfp106
UTP14A	UTP14, U3 small nucleolar ribonucleoprotein, homolog A (yeast) [Source:HGNC Symbol;Acc:10665]	ENSG00000156697	ENSP00000413187	ENSMUSG00000063785	Utp14a
UTP14C	UTP14, U3 small nucleolar ribonucleoprotein, homolog C (yeast) [Source:HGNC Symbol;Acc:20321]	ENSG00000253797	ENSP00000428619	ENSMUSG00000063785	Utp14a
TRUB1	TruB pseudouridine (psi) synthase homolog 1 (E. coli) [Source:HGNC Symbol;Acc:16060]	ENSG00000165832	ENSP00000298746	ENSMUSG00000025086	Trub1
TRUB2	TruB pseudouridine (psi) synthase homolog 2 (E. coli) [Source:HGNC Symbol;Acc:17170]	ENSG00000167112	ENSP00000438084	ENSMUSG00000039826	Trub2
PRIM1	primase, DNA, polypeptide 1 (49kDa) [Source:HGNC Symbol;Acc:9369]	ENSG00000198056	ENSP00000350491	ENSMUSG00000025395	Prim1
PTCD3	pentatricopeptide repeat domain 3 [Source:HGNC Symbol;Acc:24717] [Type: protein coding Ensembl/Havana merge]	ENSG00000132300	ENSP00000254630	ENSMUSG00000063884	Ptcd3
HNRNPA0	heterogeneous nuclear ribonucleoprotein A0 [Source:HGNC Symbol;Acc:5030]	ENSG00000177733	ENSP00000316042	ENSMUSG00000007836	Hnrnpa0
HNRNPA1	heterogeneous nuclear ribonucleoprotein A1 [Source:HGNC Symbol;Acc:5031]	ENSG00000135486	ENSP00000333504	ENSMUSG00000046434	Hnrnpa1
HNRNPA1L2	heterogeneous nuclear ribonucleoprotein A1-like 2 [Source:HGNC Symbol;Acc:27067]	ENSG00000139675	ENSP00000350090	#N/A	#N/A
HNRNPA2B1	heterogeneous nuclear ribonucleoprotein A2/B1 [Source:HGNC Symbol;Acc:5033]	ENSG00000122566	ENSP00000346694	ENSMUSG00000004980	Hnrnpa2b1
HNRNPA3	heterogeneous nuclear ribonucleoprotein A3 [Source:HGNC Symbol;Acc:24941]	ENSG00000170144	ENSP00000408487	ENSMUSG00000059005	Hnrnpa3
HNRNPAB	heterogeneous nuclear ribonucleoprotein A/B [Source:HGNC Symbol;Acc:5034]	ENSG00000197451	ENSP00000425031	ENSMUSG00000020358	Hnrnpab
HNRNPD	heterogeneous nuclear ribonucleoprotein D (AU-rich element RNA binding protein 1, 37kDa) [Source:HGNC Symbol;Acc:5036]	ENSG00000138668	ENSP00000439380	ENSMUSG00000000568	Hnrnpd
HNRNPDL	heterogeneous nuclear ribonucleoprotein D-like [Source:HGNC Symbol;Acc:5037]	ENSG00000152795	ENSP00000295470	ENSMUSG00000029328	Hnrnpdl
RANBP2	RAN binding protein 2 [Source:HGNC Symbol;Acc:9848]	ENSG00000153201	ENSP00000283195	ENSMUSG00000003226	Ranbp2
RPL7	ribosomal protein L7 [Source:HGNC Symbol;Acc:10363]	ENSG00000147604	ENSP00000401300	ENSMUSG00000043716	Rpl7
RPL7L1	ribosomal protein L7-like 1 [Source:HGNC Symbol;Acc:21370]	ENSG00000146223	ENSP00000445293	ENSMUSG00000063888	Rpl7l1
RNASE13	ribonuclease, RNase A family, 13 (non-active) [Source:HGNC Symbol;Acc:25285]	ENSG00000206150	ENSP00000372410	ENSMUSG00000068392	Rnase13
RPS6	ribosomal protein S6 [Source:HGNC Symbol;Acc:10429]	ENSG00000137154	ENSP00000369757	ENSMUSG00000028495	Rps6
MRPL3	mitochondrial ribosomal protein L3 [Source:HGNC Symbol;Acc:10379]	ENSG00000114686	ENSP00000398536	ENSMUSG00000032563	Mrpl3
DDX28	DEAD (Asp-Glu-Ala-Asp) box polypeptide 28 [Source:HGNC Symbol;Acc:17330]	ENSG00000182810	ENSP00000332340	ENSMUSG00000045538	Ddx28
DDX47	DEAD (Asp-Glu-Ala-Asp) box polypeptide 47 [Source:HGNC Symbol;Acc:18682]	ENSG00000213782	ENSP00000319578	ENSMUSG00000030204	Ddx47
RNASEH2C	ribonuclease H2, subunit C [Source:HGNC Symbol;Acc:24116]	ENSG00000172922	ENSP00000432897	ENSMUSG00000024925	Rnaseh2c
TFB2M	transcription factor B2, mitochondrial [Source:HGNC Symbol;Acc:18559]	ENSG00000162851	ENSP00000442426	ENSMUSG00000026492	Tfb2m
TEP1	telomerase-associated protein 1 [Source:HGNC Symbol;Acc:11726]	ENSG00000129566	ENSP00000452574	ENSMUSG00000006281	Tep1
NOC4L	nucleolar complex associated 4 homolog (S. cerevisiae) [Source:HGNC Symbol;Acc:28461]	ENSG00000184967	ENSP00000443336	ENSMUSG00000033294	Noc4l
CPSF1	cleavage and polyadenylation specific factor 1, 160kDa [Source:HGNC Symbol;Acc:2324]	ENSG00000071894	ENSP00000339353	ENSMUSG00000034022	Cpsf1
DDX1	DEAD (Asp-Glu-Ala-Asp) box helicase 1 [Source:HGNC Symbol;Acc:2734]	ENSG00000079785	ENSP00000370745	ENSMUSG00000037149	Ddx1
DDX3X	DEAD (Asp-Glu-Ala-Asp) box polypeptide 3, X-linked [Source:HGNC Symbol;Acc:2745]	ENSG00000215301	ENSP00000392494	ENSMUSG00000000787	Ddx3x
DDX3Y	DEAD (Asp-Glu-Ala-Asp) box polypeptide 3, Y-linked [Source:HGNC Symbol;Acc:2699]	ENSG00000067048	ENSP00000353284	ENSMUSG00000069045	Ddx3y
DDX4	DEAD (Asp-Glu-Ala-Asp) box polypeptide 4 [Source:HGNC Symbol;Acc:18700]	ENSG00000152670	ENSP00000425359	ENSMUSG00000021758	Ddx4
NOP56	NOP56 ribonucleoprotein [Source:HGNC Symbol;Acc:15911]	ENSG00000101361	ENSP00000370589	ENSMUSG00000027405	Nop56
RPS20	ribosomal protein S20 [Source:HGNC Symbol;Acc:10405]	ENSG00000008988	ENSP00000427860	ENSMUSG00000028234	Rps20
MPHOSPH10	M-phase phosphoprotein 10 (U3 small nucleolar ribonucleoprotein) [Source:HGNC Symbol;Acc:7213]	ENSG00000124383	ENSP00000244230	ENSMUSG00000030521	Mphosph10
MRM1	mitochondrial rRNA methyltransferase 1 homolog (S. cerevisiae) [Source:HGNC Symbol;Acc:26202]	ENSG00000129282	ENSP00000250156	ENSMUSG00000018405	Mrm1
DXO	dom-3 homolog Z (C. elegans) [Source:HGNC Symbol;Acc:2992]	ENSG00000236765	ENSP00000391123	ENSMUSG00000040482	Dxo
DENR	density-regulated protein [Source:HGNC Symbol;Acc:2769]	ENSG00000139726	ENSP00000413661	ENSMUSG00000023106	Denr
RPL21	ribosomal protein L21 [Source:HGNC Symbol;Acc:10313]	ENSG00000122026	ENSP00000346027	ENSMUSG00000041453	Rpl21
RPS10	ribosomal protein S10 [Source:HGNC Symbol;Acc:10383]	ENSG00000124614	ENSP00000347271	ENSMUSG00000052146	Rps10
NAT10	N-acetyltransferase 10 (GCN5-related) [Source:HGNC Symbol;Acc:29830]	ENSG00000135372	ENSP00000433011	ENSMUSG00000027185	Nat10
UTP18	UTP18 small subunit (SSU) processome component homolog (yeast) [Source:HGNC Symbol;Acc:24274]	ENSG00000011260	ENSP00000225298	ENSMUSG00000054079	Utp18
NOL12	nucleolar protein 12 [Source:HGNC Symbol;Acc:28585]	ENSG00000100101	ENSP00000352021	ENSMUSG00000033099	Nol12
DDX31	DEAD (Asp-Glu-Ala-Asp) box polypeptide 31 [Source:HGNC Symbol;Acc:16715]	ENSG00000125485	ENSP00000387730	ENSMUSG00000026806	Ddx31
ABCF1	ATP-binding cassette, sub-family F (GCN20), member 1 [Source:HGNC Symbol;Acc:70]	ENSG00000225989	ENSP00000412553	ENSMUSG00000038762	Abcf1
DNMT1	DNA (cytosine-5-)-methyltransferase 1 [Source:HGNC Symbol;Acc:2976]	ENSG00000130816	ENSP00000352516	ENSMUSG00000004099	Dnmt1
SNRPA1	small nuclear ribonucleoprotein polypeptide A' [Source:HGNC Symbol;Acc:11152]	ENSG00000131876	ENSP00000254193	ENSMUSG00000030512	Snrpa1
API5	apoptosis inhibitor 5 [Source:HGNC Symbol;Acc:594]	ENSG00000166181	ENSP00000436189	ENSMUSG00000027193	Api5
SHQ1	SHQ1, H/ACA ribonucleoprotein assembly factor [Source:HGNC Symbol;Acc:25543]	ENSG00000144736	ENSP00000417452	ENSMUSG00000035378	Shq1
AKAP1	A kinase (PRKA) anchor protein 1 [Source:HGNC Symbol;Acc:367]	ENSG00000121057	ENSP00000459895	ENSMUSG00000018428	Akap1
FTO	fat mass and obesity associated [Source:HGNC Symbol;Acc:24678]	ENSG00000140718	ENSP00000418823	ENSMUSG00000055932	Fto
PUF60	poly-U binding splicing factor 60KDa [Source:HGNC Symbol;Acc:17042]	ENSG00000179950	ENSP00000431960	ENSMUSG00000002524	Puf60
SAMHD1	SAM domain and HD domain 1 [Source:HGNC Symbol;Acc:15925]	ENSG00000101347	ENSP00000262878	ENSMUSG00000027639	Samhd1
RBM45	RNA binding motif protein 45 [Source:HGNC Symbol;Acc:24468]	ENSG00000155636	ENSP00000286070	ENSMUSG00000042369	Rbm45
FAM98B	family with sequence similarity 98, member B [Source:HGNC Symbol;Acc:26773]	ENSG00000171262	ENSP00000380734	ENSMUSG00000027349	Fam98b
FAM98A	family with sequence similarity 98, member A [Source:HGNC Symbol;Acc:24520]	ENSG00000119812	ENSP00000398490	ENSMUSG00000002017	Fam98a
FAM98C	family with sequence similarity 98, member C [Source:HGNC Symbol;Acc:27119]	ENSG00000130244	ENSP00000340348	ENSMUSG00000030590	Fam98c
PCF11	PCF11, cleavage and polyadenylation factor subunit, homolog (S. cerevisiae) [Source:HGNC Symbol;Acc:30097]	ENSG00000165494	ENSP00000298281	ENSMUSG00000041328	Pcf11
EIF5	eukaryotic translation initiation factor 5 [Source:HGNC Symbol;Acc:3299]	ENSG00000100664	ENSP00000376477	ENSMUSG00000021282	Eif5
ZC3HC1	zinc finger, C3HC-type containing 1 [Source:HGNC Symbol;Acc:29913]	ENSG00000091732	ENSP00000309301	ENSMUSG00000039130	Zc3hc1
HNRNPC	heterogeneous nuclear ribonucleoprotein C (C1/C2) [Source:HGNC Symbol;Acc:5035]	ENSG00000092199	ENSP00000450669	ENSMUSG00000060373	Hnrnpc
HNRNPCL1	heterogeneous nuclear ribonucleoprotein C-like 1 [Source:HGNC Symbol;Acc:29295]	ENSG00000179172	ENSP00000365370	ENSMUSG00000060373	Hnrnpc
RALY	RNA binding protein, autoantigenic (hnRNP-associated with lethal yellow homolog (mouse)) [Source:HGNC Symbol;Acc:15921]	ENSG00000125970	ENSP00000415973	ENSMUSG00000027593	Raly
RALYL	RALY RNA binding protein-like [Source:HGNC Symbol;Acc:27036]	ENSG00000184672	ENSP00000430128	ENSMUSG00000039717	Ralyl
SEPSECS	Sep (O-phosphoserine) tRNA:Sec (selenocysteine) tRNA synthase [Source:HGNC Symbol;Acc:30605]	ENSG00000109618	ENSP00000371535	ENSMUSG00000029173	Sepsecs
NPM1	nucleophosmin (nucleolar phosphoprotein B23, numatrin) [Source:HGNC Symbol;Acc:7910]	ENSG00000181163	ENSP00000341168	ENSMUSG00000057113	Npm1
NPM3	nucleophosmin/nucleoplasmin 3 [Source:HGNC Symbol;Acc:7931]	ENSG00000107833	ENSP00000359128	ENSMUSG00000056209	Npm3
NPM2	nucleophosmin/nucleoplasmin 2 [Source:HGNC Symbol;Acc:7930]	ENSG00000158806	ENSP00000289820	ENSMUSG00000047911	Npm2
NUPL2	nucleoporin like 2 [Source:HGNC Symbol;Acc:17010]	ENSG00000136243	ENSP00000387330	ENSMUSG00000048439	Nupl2
MRPS14	mitochondrial ribosomal protein S14 [Source:HGNC Symbol;Acc:14049]	ENSG00000120333	ENSP00000420714	ENSMUSG00000058267	Mrps14
SF3A1	splicing factor 3a, subunit 1, 120kDa [Source:HGNC Symbol;Acc:10765]	ENSG00000099995	ENSP00000390336	ENSMUSG00000002129	Sf3a1
EIF3A	eukaryotic translation initiation factor 3, subunit A [Source:HGNC Symbol;Acc:3271]	ENSG00000107581	ENSP00000358140	ENSMUSG00000024991	Eif3a
FASTKD5	FAST kinase domains 5 [Source:HGNC Symbol;Acc:25790]	ENSG00000215251	ENSP00000369618	ENSMUSG00000079043	Fastkd5
TDRD3	tudor domain containing 3 [Source:HGNC Symbol;Acc:20612]	ENSG00000083544	ENSP00000440190	ENSMUSG00000022019	Tdrd3
SNRPB	small nuclear ribonucleoprotein polypeptides B and B1 [Source:HGNC Symbol;Acc:11153]	ENSG00000125835	ENSP00000370746	ENSMUSG00000027404	Snrpb
SNRPN	small nuclear ribonucleoprotein polypeptide N [Source:HGNC Symbol;Acc:11164]	ENSG00000128739	ENSP00000408767	ENSMUSG00000102252	Snrpn
YRDC	yrdC domain containing (E. coli) [Source:HGNC Symbol;Acc:28905]	ENSG00000196449	ENSP00000362135	ENSMUSG00000028889	Yrdc
POLR2K	polymerase (RNA) II (DNA directed) polypeptide K, 7.0kDa [Source:HGNC Symbol;Acc:9198]	ENSG00000147669	ENSP00000342889	ENSMUSG00000045996	Polr2k
ERN2	endoplasmic reticulum to nucleus signaling 2 [Source:HGNC Symbol;Acc:16942]	ENSG00000134398	ENSP00000256797	ENSMUSG00000030866	Ern2
ERN1	endoplasmic reticulum to nucleus signaling 1 [Source:HGNC Symbol;Acc:3449]	ENSG00000178607	ENSP00000401445	ENSMUSG00000020715	Ern1
RPL5	ribosomal protein L5 [Source:HGNC Symbol;Acc:10360]	ENSG00000122406	ENSP00000359345	ENSMUSG00000058558	Rpl5
RPS17	ribosomal protein S17 [Source:HGNC Symbol;Acc:10397]	ENSG00000184779	ENSP00000453564	ENSMUSG00000061787	Rps17
RPS17L	ribosomal protein S17-like [Source:HGNC Symbol;Acc:40029]	ENSG00000182774	ENSP00000453910	ENSMUSG00000061787	Rps17
DARS	aspartyl-tRNA synthetase [Source:HGNC Symbol;Acc:2678]	ENSG00000115866	ENSP00000264161	ENSMUSG00000026356	Dars
IPO7	importin 7 [Source:HGNC Symbol;Acc:9852]	ENSG00000205339	ENSP00000369042	ENSMUSG00000066232	Ipo7
IPO8	importin 8 [Source:HGNC Symbol;Acc:9853]	ENSG00000133704	ENSP00000256079	ENSMUSG00000040029	Ipo8
SMN1	survival of motor neuron 1, telomeric [Source:HGNC Symbol;Acc:11117]	ENSG00000172062	ENSP00000305857	ENSMUSG00000021645	Smn1
SMN2	survival of motor neuron 2, centromeric [Source:HGNC Symbol;Acc:11118]	ENSG00000205571	ENSP00000370117	ENSMUSG00000021645	Smn1
GTPBP4	GTP binding protein 4 [Source:HGNC Symbol;Acc:21535]	ENSG00000107937	ENSP00000354040	ENSMUSG00000021149	Gtpbp4
MRPL13	mitochondrial ribosomal protein L13 [Source:HGNC Symbol;Acc:14278]	ENSG00000172172	ENSP00000430545	ENSMUSG00000022370	Mrpl13
MRPL46	mitochondrial ribosomal protein L46 [Source:HGNC Symbol;Acc:1192]	ENSG00000259494	ENSP00000312311	ENSMUSG00000030612	Mrpl46
LSM5	LSM5 homolog, U6 small nuclear RNA associated (S. cerevisiae) [Source:HGNC Symbol;Acc:17162]	ENSG00000106355	ENSP00000386707	ENSMUSG00000091625	Lsm5
EIF4G3	eukaryotic translation initiation factor 4 gamma, 3 [Source:HGNC Symbol;Acc:3298]	ENSG00000075151	ENSP00000264211	ENSMUSG00000028760	Eif4g3
EIF4G1	eukaryotic translation initiation factor 4 gamma, 1 [Source:HGNC Symbol;Acc:3296]	ENSG00000114867	ENSP00000343450	ENSMUSG00000045983	Eif4g1
EIF4G2	eukaryotic translation initiation factor 4 gamma, 2 [Source:HGNC Symbol;Acc:3297]	ENSG00000110321	ENSP00000433664	ENSMUSG00000005610	Eif4g2
GTF2F1	general transcription factor IIF, polypeptide 1, 74kDa [Source:HGNC Symbol;Acc:4652] [Type: protein coding Ensembl/Havana merge]	ENSG00000125651	ENSP00000377969	ENSMUSG00000002658	Gtf2f1
RPS15A	ribosomal protein S15a [Source:HGNC Symbol;Acc:10389]	ENSG00000134419	ENSP00000318646	ENSMUSG00000008683	Rps15a
PIH1D2	PIH1 domain containing 2 [Source:HGNC Symbol;Acc:25210]	ENSG00000262740	ENSP00000460262	ENSMUSG00000000167	Pih1d2
TTF2	transcription termination factor, RNA polymerase II [Source:HGNC Symbol;Acc:12398]	ENSG00000116830	ENSP00000358478	ENSMUSG00000033222	Ttf2
PUS3	pseudouridylate synthase 3 [Source:HGNC Symbol;Acc:25461]	ENSG00000110060	ENSP00000432386	ENSMUSG00000032103	Pus3
RBM7	RNA binding motif protein 7 [Source:HGNC Symbol;Acc:9904]	ENSG00000076053	ENSP00000364639	ENSMUSG00000042396	Rbm7
RBM11	RNA binding motif protein 11 [Source:HGNC Symbol;Acc:9897]	ENSG00000185272	ENSP00000383421	ENSMUSG00000032940	Rbm11
TSEN2	tRNA splicing endonuclease 2 homolog (S. cerevisiae) [Source:HGNC Symbol;Acc:28422]	ENSG00000154743	ENSP00000284995	ENSMUSG00000042389	Tsen2
RBM42	RNA binding motif protein 42 [Source:HGNC Symbol;Acc:28117]	ENSG00000126254	ENSP00000466044	ENSMUSG00000036733	Rbm42
UTP3	UTP3, small subunit (SSU) processome component, homolog (S. cerevisiae) [Source:HGNC Symbol;Acc:24477]	ENSG00000132467	ENSP00000254803	ENSMUSG00000070697	Utp3
HNRNPL	heterogeneous nuclear ribonucleoprotein L [Source:HGNC Symbol;Acc:5045]	ENSG00000104824	ENSP00000221419	ENSMUSG00000015165	Hnrnpl
HNRNPLL	heterogeneous nuclear ribonucleoprotein L-like [Source:HGNC Symbol;Acc:25127]	ENSG00000143889	ENSP00000386575	ENSMUSG00000024095	Hnrnpll
PTBP1	polypyrimidine tract binding protein 1 [Source:HGNC Symbol;Acc:9583]	ENSG00000011304	ENSP00000349428	ENSMUSG00000006498	Ptbp1
PTBP2	polypyrimidine tract binding protein 2 [Source:HGNC Symbol;Acc:17662]	ENSG00000117569	ENSP00000359217	ENSMUSG00000028134	Ptbp2
PTBP3	polypyrimidine tract binding protein 3 [Source:HGNC Symbol;Acc:10253]	ENSG00000119314	ENSP00000414921	ENSMUSG00000028382	Ptbp3
SYMPK	symplekin [Source:HGNC Symbol;Acc:22935]	ENSG00000125755	ENSP00000245934	ENSMUSG00000023118	Sympk
POLR2F	polymerase (RNA) II (DNA directed) polypeptide F [Source:HGNC Symbol;Acc:9193]	ENSG00000100142	ENSP00000403852	ENSMUSG00000033020	Polr2f
TSR2	TSR2, 20S rRNA accumulation, homolog (S. cerevisiae) [Source:HGNC Symbol;Acc:25455]	ENSG00000158526	ENSP00000364293	ENSMUSG00000025264	Tsr2
KIAA0391	mitochondrial ribonuclease P protein 3 isoform 4 [Source:RefSeq peptide;Acc:NP_001243609]	ENSG00000100890	ENSP00000450898	ENSMUSG00000021023	Prorp
POLR2G	polymerase (RNA) II (DNA directed) polypeptide G [Source:HGNC Symbol;Acc:9194]	ENSG00000168002	ENSP00000301788	ENSMUSG00000071662	Polr2g
WDR5	WD repeat domain 5 [Source:HGNC Symbol;Acc:12757]	ENSG00000196363	ENSP00000351446	ENSMUSG00000026917	Wdr5
SNRNP40	small nuclear ribonucleoprotein 40kDa (U5) [Source:HGNC Symbol;Acc:30857]	ENSG00000060688	ENSP00000263694	ENSMUSG00000074088	Snrnp40
WDR83	WD repeat domain 83 [Source:HGNC Symbol;Acc:32672]	ENSG00000123154	ENSP00000402653	ENSMUSG00000005150	Wdr83
ZFC3H1	zinc finger, C3H1-type containing [Source:HGNC Symbol;Acc:28328]	ENSG00000133858	ENSP00000368017	ENSMUSG00000034163	Zfc3h1
RPL15	ribosomal protein L15 [Source:HGNC Symbol;Acc:10306]	ENSG00000174748	ENSP00000387925	ENSMUSG00000012405	Rpl15
SNRNP35	small nuclear ribonucleoprotein 35kDa (U11/U12) [Source:HGNC Symbol;Acc:30852]	ENSG00000184209	ENSP00000432595	ENSMUSG00000029402	Snrnp35
SNRNP70	small nuclear ribonucleoprotein 70kDa (U1) [Source:HGNC Symbol;Acc:11150]	ENSG00000104852	ENSP00000472998	ENSMUSG00000063511	Snrnp70
MRPL39	mitochondrial ribosomal protein L39 [Source:HGNC Symbol;Acc:14027]	ENSG00000154719	ENSP00000305682	ENSMUSG00000022889	Mrpl39
TLR7	toll-like receptor 7 [Source:HGNC Symbol;Acc:15631] [Type: protein coding Ensembl/Havana merge]	ENSG00000196664	ENSP00000370034	ENSMUSG00000044583	Tlr7
TLR8	toll-like receptor 8 [Source:HGNC Symbol;Acc:15632]	ENSG00000101916	ENSP00000218032	ENSMUSG00000040522	Tlr8
TLR3	toll-like receptor 3 [Source:HGNC Symbol;Acc:11849] [Type: protein coding Ensembl/Havana merge]	ENSG00000164342	ENSP00000296795	ENSMUSG00000031639	Tlr3
NAA38	N(alpha)-acetyltransferase 38, NatC auxiliary subunit [Source:HGNC Symbol;Acc:20471]	ENSG00000128534	ENSP00000403811	ENSMUSG00000044155	Lsm8
PRPF31	PRP31 pre-mRNA processing factor 31 homolog (S. cerevisiae) [Source:HGNC Symbol;Acc:15446]	ENSG00000105618	ENSP00000324122	ENSMUSG00000008373	Prpf31
MRPL55	mitochondrial ribosomal protein L55 [Source:HGNC Symbol;Acc:16686]	ENSG00000162910	ENSP00000337342	ENSMUSG00000036860	Mrpl55
TRMT2A	tRNA methyltransferase 2 homolog A (S. cerevisiae) [Source:HGNC Symbol;Acc:24974]	ENSG00000099899	ENSP00000252136	ENSMUSG00000022721	Trmt2a
TRMT2B	tRNA methyltransferase 2 homolog B (S. cerevisiae) [Source:HGNC Symbol;Acc:25748]	ENSG00000188917	ENSP00000362027	ENSMUSG00000067369	Trmt2b
RPS3A	ribosomal protein S3A [Source:HGNC Symbol;Acc:10421]	ENSG00000145425	ENSP00000426466	ENSMUSG00000028081	Rps3a1
BRCA1	breast cancer 1, early onset [Source:HGNC Symbol;Acc:1100]	ENSG00000012048	ENSP00000418960	ENSMUSG00000017146	Brca1
RIOK2	RIO kinase 2 [Source:HGNC Symbol;Acc:18999]	ENSG00000058729	ENSP00000283109	ENSMUSG00000116564	Riok2
DHX16	DEAH (Asp-Glu-Ala-His) box polypeptide 16 [Source:HGNC Symbol;Acc:2739]	ENSG00000206486	ENSP00000373071	ENSMUSG00000024422	Dhx16
DHX33	DEAH (Asp-Glu-Ala-His) box polypeptide 33 [Source:HGNC Symbol;Acc:16718]	ENSG00000005100	ENSP00000458925	ENSMUSG00000040620	Dhx33
DHX35	DEAH (Asp-Glu-Ala-His) box polypeptide 35 [Source:HGNC Symbol;Acc:15861]	ENSG00000101452	ENSP00000252011	ENSMUSG00000027655	Dhx35
DHX32	DEAH (Asp-Glu-Ala-His) box polypeptide 32 [Source:HGNC Symbol;Acc:16717]	ENSG00000089876	ENSP00000284688	ENSMUSG00000030986	Dhx32
DQX1	DEAQ box RNA-dependent ATPase 1 [Source:HGNC Symbol;Acc:20410]	ENSG00000144045	ENSP00000377523	ENSMUSG00000009145	Dqx1
DHX15	DEAH (Asp-Glu-Ala-His) box polypeptide 15 [Source:HGNC Symbol;Acc:2738]	ENSG00000109606	ENSP00000336741	ENSMUSG00000029169	Dhx15
DHX8	DEAH (Asp-Glu-Ala-His) box polypeptide 8 [Source:HGNC Symbol;Acc:2749]	ENSG00000067596	ENSP00000262415	ENSMUSG00000034931	Dhx8
MRPS5	mitochondrial ribosomal protein S5 [Source:HGNC Symbol;Acc:14498]	ENSG00000144029	ENSP00000272418	ENSMUSG00000027374	Mrps5
SAP18	Sin3A-associated protein, 18kDa [Source:HGNC Symbol;Acc:10530]	ENSG00000150459	ENSP00000391846	ENSMUSG00000061104	Sap18b
TUFM	Tu translation elongation factor, mitochondrial [Source:HGNC Symbol;Acc:12420]	ENSG00000178952	ENSP00000322439	ENSMUSG00000073838	Tufm
EEFSEC	eukaryotic elongation factor, selenocysteine-tRNA-specific [Source:HGNC Symbol;Acc:24614]	ENSG00000132394	ENSP00000254730	ENSMUSG00000033216	Eefsec
TDRD12	tudor domain containing 12 [Source:HGNC Symbol;Acc:25044]	ENSG00000173809	ENSP00000416248	ENSMUSG00000030491	Tdrd12
SKIV2L2	superkiller viralicidic activity 2-like 2 (S. cerevisiae) [Source:HGNC Symbol;Acc:18734]	ENSG00000039123	ENSP00000230640	ENSMUSG00000016018	Mtrex
TRDMT1	tRNA aspartic acid methyltransferase 1 [Source:HGNC Symbol;Acc:2977]	ENSG00000107614	ENSP00000367030	ENSMUSG00000026723	Trdmt1
ZNF473	zinc finger protein 473 [Source:HGNC Symbol;Acc:23239]	ENSG00000142528	ENSP00000472808	ENSMUSG00000048012	Zfp473
FCF1	FCF1 small subunit (SSU) processome component homolog (S. cerevisiae) [Source:HGNC Symbol;Acc:20220]	ENSG00000119616	ENSP00000450750	ENSMUSG00000021243	Fcf1
URB1	URB1 ribosome biogenesis 1 homolog (S. cerevisiae) [Source:HGNC Symbol;Acc:17344]	ENSG00000142207	ENSP00000372199	ENSMUSG00000039929	Urb1
CARS	cysteinyl-tRNA synthetase [Source:HGNC Symbol;Acc:1493]	ENSG00000110619	ENSP00000278224	ENSMUSG00000010755	Cars
CARS2	cysteinyl-tRNA synthetase 2, mitochondrial (putative) [Source:HGNC Symbol;Acc:25695]	ENSG00000134905	ENSP00000257347	ENSMUSG00000056228	Cars2
CELF1	CUGBP, Elav-like family member 1 [Source:HGNC Symbol;Acc:2549]	ENSG00000149187	ENSP00000351409	ENSMUSG00000005506	Celf1
CELF2	CUGBP, Elav-like family member 2 [Source:HGNC Symbol;Acc:2550]	ENSG00000048740	ENSP00000388530	ENSMUSG00000002107	Celf2
CELF3	CUGBP, Elav-like family member 3 [Source:HGNC Symbol;Acc:11967]	ENSG00000159409	ENSP00000290585	ENSMUSG00000028137	Celf3
CELF4	CUGBP, Elav-like family member 4 [Source:HGNC Symbol;Acc:14015]	ENSG00000101489	ENSP00000335631	ENSMUSG00000024268	Celf4
CELF5	CUGBP, Elav-like family member 5 [Source:HGNC Symbol;Acc:14058]	ENSG00000161082	ENSP00000292672	ENSMUSG00000034818	Celf5
CELF6	CUGBP, Elav-like family member 6 [Source:HGNC Symbol;Acc:14059]	ENSG00000140488	ENSP00000457863	ENSMUSG00000032297	Celf6
XPO1	exportin 1 (CRM1 homolog, yeast) [Source:HGNC Symbol;Acc:12825]	ENSG00000082898	ENSP00000385559	ENSMUSG00000020290	Xpo1
DDX17	DEAD (Asp-Glu-Ala-Asp) box helicase 17 [Source:HGNC Symbol;Acc:2740]	ENSG00000100201	ENSP00000380033	ENSMUSG00000055065	Ddx17
DDX46	DEAD (Asp-Glu-Ala-Asp) box polypeptide 46 [Source:HGNC Symbol;Acc:18681]	ENSG00000145833	ENSP00000416534	ENSMUSG00000021500	Ddx46
DDX5	DEAD (Asp-Glu-Ala-Asp) box helicase 5 [Source:HGNC Symbol;Acc:2746]	ENSG00000263077	ENSP00000459637	ENSMUSG00000020719	Ddx5
DDX42	DEAD (Asp-Glu-Ala-Asp) box polypeptide 42 [Source:HGNC Symbol;Acc:18676]	ENSG00000198231	ENSP00000352308	ENSMUSG00000020705	Ddx42
DDX43	DEAD (Asp-Glu-Ala-Asp) box polypeptide 43 [Source:HGNC Symbol;Acc:18677]	ENSG00000080007	ENSP00000359361	ENSMUSG00000070291	Ddx43
DDX53	DEAD (Asp-Glu-Ala-Asp) box polypeptide 53 [Source:HGNC Symbol;Acc:20083]	ENSG00000184735	ENSP00000368667	#N/A	#N/A
FIP1L1	FIP1 like 1 (S. cerevisiae) [Source:HGNC Symbol;Acc:19124]	ENSG00000145216	ENSP00000423325	ENSMUSG00000029227	Fip1l1
MRPL14	mitochondrial ribosomal protein L14 [Source:HGNC Symbol;Acc:14279]	ENSG00000180992	ENSP00000361084	ENSMUSG00000023939	Mrpl14
TXNL4A	thioredoxin-like 4A [Source:HGNC Symbol;Acc:30551]	ENSG00000141759	ENSP00000269601	ENSMUSG00000057130	Txnl4a
TXNL4B	thioredoxin-like 4B [Source:HGNC Symbol;Acc:26041]	ENSG00000140830	ENSP00000268483	ENSMUSG00000031723	Txnl4b
RBM39	RNA binding motif protein 39 [Source:HGNC Symbol;Acc:15923]	ENSG00000131051	ENSP00000436747	ENSMUSG00000027620	Rbm39
RBM23	RNA binding motif protein 23 [Source:HGNC Symbol;Acc:20155]	ENSG00000100461	ENSP00000339220	#N/A	#N/A
CPEB1	cytoplasmic polyadenylation element binding protein 1 [Source:HGNC Symbol;Acc:21744]	ENSG00000214575	ENSP00000458081	ENSMUSG00000025586	Cpeb1
CPEB2	cytoplasmic polyadenylation element binding protein 2 [Source:HGNC Symbol;Acc:21745]	ENSG00000137449	ENSP00000371838	ENSMUSG00000039782	Cpeb2
CPEB3	cytoplasmic polyadenylation element binding protein 3 [Source:HGNC Symbol;Acc:21746]	ENSG00000107864	ENSP00000398310	ENSMUSG00000039652	Cpeb3
CPEB4	cytoplasmic polyadenylation element binding protein 4 [Source:HGNC Symbol;Acc:21747]	ENSG00000113742	ENSP00000429048	ENSMUSG00000020300	Cpeb4
INTS9	integrator complex subunit 9 [Source:HGNC Symbol;Acc:25592]	ENSG00000104299	ENSP00000429065	ENSMUSG00000021975	Ints9
CACTIN	cactin, spliceosome C complex subunit [Source:HGNC Symbol;Acc:29938]	ENSG00000105298	ENSP00000415078	ENSMUSG00000034889	Cactin
MPHOSPH6	M-phase phosphoprotein 6 [Source:HGNC Symbol;Acc:7214]	ENSG00000135698	ENSP00000456626	ENSMUSG00000031843	Mphosph6
RPL34	ribosomal protein L34 [Source:HGNC Symbol;Acc:10340]	ENSG00000109475	ENSP00000378160	ENSMUSG00000062006	Rpl34
OBFC1	oligonucleotide/oligosaccharide-binding fold containing 1 [Source:HGNC Symbol;Acc:26200]	ENSG00000107960	ENSP00000358779	ENSMUSG00000042694	Stn1
RPS12	ribosomal protein S12 [Source:HGNC Symbol;Acc:10385]	ENSG00000112306	ENSP00000230050	ENSMUSG00000061983	Rps12
PRPF8	PRP8 pre-mRNA processing factor 8 homolog (S. cerevisiae) [Source:HGNC Symbol;Acc:17340]	ENSG00000174231	ENSP00000460348	ENSMUSG00000020850	Prpf8
SECISBP2L	SECIS binding protein 2-like [Source:HGNC Symbol;Acc:28997]	ENSG00000138593	ENSP00000370314	ENSMUSG00000035093	Secisbp2l
SECISBP2	SECIS binding protein 2 [Source:HGNC Symbol;Acc:30972]	ENSG00000187742	ENSP00000364959	ENSMUSG00000035139	Secisbp2
RPUSD3	RNA pseudouridylate synthase domain containing 3 [Source:HGNC Symbol;Acc:28437]	ENSG00000156990	ENSP00000405054	ENSMUSG00000051169	Rpusd3
RPUSD4	RNA pseudouridylate synthase domain containing 4 [Source:HGNC Symbol;Acc:25898]	ENSG00000165526	ENSP00000298317	ENSMUSG00000032044	Rpusd4
DDX6	DEAD (Asp-Glu-Ala-Asp) box helicase 6 [Source:HGNC Symbol;Acc:2747]	ENSG00000269612	ENSP00000469200	ENSMUSG00000032097	Ddx6
RPL28	ribosomal protein L28 [Source:HGNC Symbol;Acc:10330]	ENSG00000108107	ENSP00000453584	ENSMUSG00000030432	Rpl28
ELAC1	elaC homolog 1 (E. coli) [Source:HGNC Symbol;Acc:14197]	ENSG00000141642	ENSP00000464770	ENSMUSG00000036941	Elac1
NOM1	nucleolar protein with MIF4G domain 1 [Source:HGNC Symbol;Acc:13244]	ENSG00000146909	ENSP00000275820	ENSMUSG00000001569	Nom1
TROVE2	TROVE domain family, member 2 [Source:HGNC Symbol;Acc:11313]	ENSG00000116747	ENSP00000472298	ENSMUSG00000018199	Ro60
EEF1E1	eukaryotic translation elongation factor 1 epsilon 1 [Source:HGNC Symbol;Acc:3212]	ENSG00000124802	ENSP00000369038	ENSMUSG00000001707	Eef1e1
TARSL2	threonyl-tRNA synthetase-like 2 [Source:HGNC Symbol;Acc:24728]	ENSG00000185418	ENSP00000338093	ENSMUSG00000030515	Tarsl2
TARS	threonyl-tRNA synthetase [Source:HGNC Symbol;Acc:11572]	ENSG00000113407	ENSP00000387710	ENSMUSG00000022241	Tars
TARS2	threonyl-tRNA synthetase 2, mitochondrial (putative) [Source:HGNC Symbol;Acc:30740]	ENSG00000143374	ENSP00000358060	ENSMUSG00000028107	Tars2
IARS	isoleucyl-tRNA synthetase [Source:HGNC Symbol;Acc:5330]	ENSG00000196305	ENSP00000406448	ENSMUSG00000037851	Iars
RPL18A	ribosomal protein L18a [Source:HGNC Symbol;Acc:10311]	ENSG00000105640	ENSP00000471584	ENSMUSG00000045128	Rpl18a
ESF1	ESF1, nucleolar pre-rRNA processing protein, homolog (S. cerevisiae) [Source:HGNC Symbol;Acc:15898]	ENSG00000089048	ENSP00000202816	ENSMUSG00000045624	Esf1
EEF2	eukaryotic translation elongation factor 2 [Source:HGNC Symbol;Acc:3214]	ENSG00000167658	ENSP00000307940	ENSMUSG00000034994	Eef2
EFTUD2	elongation factor Tu GTP binding domain containing 2 [Source:HGNC Symbol;Acc:30858]	ENSG00000108883	ENSP00000465058	ENSMUSG00000020929	Eftud2
DDX60	DEAD (Asp-Glu-Ala-Asp) box polypeptide 60 [Source:HGNC Symbol;Acc:25942]	ENSG00000137628	ENSP00000377344	ENSMUSG00000037921	Ddx60
DDX60L	DEAD (Asp-Glu-Ala-Asp) box polypeptide 60-like [Source:HGNC Symbol;Acc:26429]	ENSG00000181381	ENSP00000422423	#N/A	#N/A
MRPL2	mitochondrial ribosomal protein L2 [Source:HGNC Symbol;Acc:14056]	ENSG00000112651	ENSP00000230413	ENSMUSG00000002767	Mrpl2
SLC4A1AP	solute carrier family 4 (anion exchanger), member 1, adaptor protein [Source:HGNC Symbol;Acc:13813]	ENSG00000163798	ENSP00000323837	ENSMUSG00000029141	Slc4a1ap
MAZ	MYC-associated zinc finger protein (purine-binding transcription factor) [Source:HGNC Symbol;Acc:6914]	ENSG00000103495	ENSP00000443956	ENSMUSG00000030678	Maz
EIF2S3L	Putative eukaryotic translation initiation factor 2 subunit 3-like protein [Source:UniProtKB/Swiss-Prot;Acc:Q2VIR3]	ENSG00000180574	ENSP00000445077	ENSMUSG00000069049	Eif2s3y
EIF2S3	eukaryotic translation initiation factor 2, subunit 3 gamma, 52kDa [Source:HGNC Symbol;Acc:3267]	ENSG00000130741	ENSP00000253039	ENSMUSG00000069049	Eif2s3y
AIMP1	aminoacyl tRNA synthetase complex-interacting multifunctional protein 1 [Source:HGNC Symbol;Acc:10648]	ENSG00000164022	ENSP00000350699	ENSMUSG00000028029	Aimp1
APEX1	APEX nuclease (multifunctional DNA repair enzyme) 1 [Source:HGNC Symbol;Acc:587]	ENSG00000100823	ENSP00000452137	ENSMUSG00000035960	Apex1
EIF3J	eukaryotic translation initiation factor 3, subunit J [Source:HGNC Symbol;Acc:3270]	ENSG00000104131	ENSP00000443563	ENSMUSG00000027236	Eif3j1
PABPC3	poly(A) binding protein, cytoplasmic 3 [Source:HGNC Symbol;Acc:8556]	ENSG00000151846	ENSP00000281589	ENSMUSG00000022283	Pabpc1
PABPC1L	poly(A) binding protein, cytoplasmic 1-like [Source:HGNC Symbol;Acc:15797]	ENSG00000101104	ENSP00000217073	ENSMUSG00000054582	Pabpc1l
PABPC1L2A	poly(A) binding protein, cytoplasmic 1-like 2A [Source:HGNC Symbol;Acc:27989]	ENSG00000268574	ENSP00000471407	ENSMUSG00000086524	Pabpc1l2a
PABPC1L2B	poly(A) binding protein, cytoplasmic 1-like 2B [Source:HGNC Symbol;Acc:31852]	ENSG00000267891	ENSP00000470071	ENSMUSG00000084842	Pabpc1l2b
PABPC4L	poly(A) binding protein, cytoplasmic 4-like [Source:HGNC Symbol;Acc:31955]	ENSG00000254535	ENSP00000462986	ENSMUSG00000090919	Pabpc4l
PABPC5	poly(A) binding protein, cytoplasmic 5 [Source:HGNC Symbol;Acc:13629]	ENSG00000174740	ENSP00000308012	ENSMUSG00000034732	Pabpc5
PABPC4	poly(A) binding protein, cytoplasmic 4 (inducible form) [Source:HGNC Symbol;Acc:8557]	ENSG00000090621	ENSP00000361949	ENSMUSG00000011257	Pabpc4
PABPC1	poly(A) binding protein, cytoplasmic 1 [Source:HGNC Symbol;Acc:8554]	ENSG00000070756	ENSP00000429395	ENSMUSG00000022283	Pabpc1
MEX3A	mex-3 homolog A (C. elegans) [Source:HGNC Symbol;Acc:33482]	ENSG00000254726	ENSP00000432845	ENSMUSG00000074480	Mex3a
MEX3B	mex-3 homolog B (C. elegans) [Source:HGNC Symbol;Acc:25297]	ENSG00000183496	ENSP00000329918	ENSMUSG00000057706	Mex3b
MEX3C	mex-3 homolog C (C. elegans) [Source:HGNC Symbol;Acc:28040]	ENSG00000176624	ENSP00000385610	ENSMUSG00000037253	Mex3c
MEX3D	mex-3 homolog D (C. elegans) [Source:HGNC Symbol;Acc:16734]	ENSG00000181588	ENSP00000384398	ENSMUSG00000048696	Mex3d
GEMIN7	gem (nuclear organelle) associated protein 7 [Source:HGNC Symbol;Acc:20045]	ENSG00000142252	ENSP00000466342	ENSMUSG00000044709	Gemin7
MRPS23	mitochondrial ribosomal protein S23 [Source:HGNC Symbol;Acc:14509]	ENSG00000181610	ENSP00000320184	ENSMUSG00000023723	Mrps23
PSIP1	PC4 and SFRS1 interacting protein 1 [Source:HGNC Symbol;Acc:9527]	ENSG00000164985	ENSP00000370109	ENSMUSG00000028484	Psip1
SRP54	signal recognition particle 54kDa [Source:HGNC Symbol;Acc:11301]	ENSG00000100883	ENSP00000216774	ENSMUSG00000079108	Srp54c
FARSB	phenylalanyl-tRNA synthetase, beta subunit [Source:HGNC Symbol;Acc:17800]	ENSG00000116120	ENSP00000281828	ENSMUSG00000026245	Farsb
SPEN	spen homolog, transcriptional regulator (Drosophila) [Source:HGNC Symbol;Acc:17575]	ENSG00000065526	ENSP00000364912	ENSMUSG00000040761	Spen
RBM15B	RNA binding motif protein 15B [Source:HGNC Symbol;Acc:24303]	ENSG00000179837	ENSP00000313890	ENSMUSG00000074102	Rbm15b
RBM15	RNA binding motif protein 15 [Source:HGNC Symbol;Acc:14959]	ENSG00000162775	ENSP00000473638	ENSMUSG00000048109	Rbm15
DNAAF2	dynein, axonemal, assembly factor 2 [Source:HGNC Symbol;Acc:20188]	ENSG00000165506	ENSP00000384862	ENSMUSG00000020973	Dnaaf2
SF3B1	splicing factor 3b, subunit 1, 155kDa [Source:HGNC Symbol;Acc:10768]	ENSG00000115524	ENSP00000335321	ENSMUSG00000025982	Sf3b1
RNASEH2B	ribonuclease H2, subunit B [Source:HGNC Symbol;Acc:25671]	ENSG00000136104	ENSP00000337623	ENSMUSG00000021932	Rnaseh2b
FARSA	phenylalanyl-tRNA synthetase, alpha subunit [Source:HGNC Symbol;Acc:3592]	ENSG00000179115	ENSP00000467384	ENSMUSG00000003808	Farsa
NOB1	NIN1/RPN12 binding protein 1 homolog (S. cerevisiae) [Source:HGNC Symbol;Acc:29540]	ENSG00000141101	ENSP00000268802	ENSMUSG00000003848	Nob1
EIF2A	eukaryotic translation initiation factor 2A, 65kDa [Source:HGNC Symbol;Acc:3254]	ENSG00000144895	ENSP00000385292	ENSMUSG00000027810	Eif2a
RNASEL	ribonuclease L (2',5'-oligoisoadenylate synthetase-dependent) [Source:HGNC Symbol;Acc:10050]	ENSG00000135828	ENSP00000356530	ENSMUSG00000066800	Rnasel
TRNT1	tRNA nucleotidyl transferase, CCA-adding, 1 [Source:HGNC Symbol;Acc:17341]	ENSG00000072756	ENSP00000251607	ENSMUSG00000013736	Trnt1
EIF4ENIF1	eukaryotic translation initiation factor 4E nuclear import factor 1 [Source:HGNC Symbol;Acc:16687]	ENSG00000184708	ENSP00000328103	ENSMUSG00000020454	Eif4enif1
MECP2	methyl CpG binding protein 2 (Rett syndrome) [Source:HGNC Symbol;Acc:6990]	ENSG00000169057	ENSP00000301948	ENSMUSG00000031393	Mecp2
RBM22	RNA binding motif protein 22 [Source:HGNC Symbol;Acc:25503]	ENSG00000086589	ENSP00000199814	ENSMUSG00000024604	Rbm22
CMTR1	cap methyltransferase 1 [Source:HGNC Symbol;Acc:21077]	ENSG00000137200	ENSP00000414233	ENSMUSG00000024019	Cmtr1
RPL39	ribosomal protein L39 [Source:HGNC Symbol;Acc:10350]	ENSG00000198918	ENSP00000355315	ENSMUSG00000079641	Rpl39
RPL39L	ribosomal protein L39-like [Source:HGNC Symbol;Acc:17094]	ENSG00000163923	ENSP00000389356	ENSMUSG00000039209	Rpl39l
RPSA	ribosomal protein SA [Source:HGNC Symbol;Acc:6502]	ENSG00000168028	ENSP00000410848	ENSMUSG00000032518	Rpsa
PARP4	poly (ADP-ribose) polymerase family, member 4 [Source:HGNC Symbol;Acc:271]	ENSG00000102699	ENSP00000371419	ENSMUSG00000054509	Parp4
CSTF1	cleavage stimulation factor, 3' pre-RNA, subunit 1, 50kDa [Source:HGNC Symbol;Acc:2483]	ENSG00000101138	ENSP00000217109	ENSMUSG00000027498	Cstf1
NCBP1	nuclear cap binding protein subunit 1, 80kDa [Source:HGNC Symbol;Acc:7658]	ENSG00000136937	ENSP00000364289	ENSMUSG00000028330	Ncbp1
SNRNP25	small nuclear ribonucleoprotein 25kDa (U11/U12) [Source:HGNC Symbol;Acc:14161]	ENSG00000161981	ENSP00000372482	ENSMUSG00000040767	Snrnp25
DNAJC21	DnaJ (Hsp40) homolog, subfamily C, member 21 [Source:HGNC Symbol;Acc:27030]	ENSG00000168724	ENSP00000306289	ENSMUSG00000044224	Dnajc21
CWC22	CWC22 spliceosome-associated protein homolog (S. cerevisiae) [Source:HGNC Symbol;Acc:29322]	ENSG00000163510	ENSP00000295749	ENSMUSG00000095824	Gm13697
NFX1	nuclear transcription factor, X-box binding 1 [Source:HGNC Symbol;Acc:7803]	ENSG00000086102	ENSP00000368856	ENSMUSG00000028423	Nfx1
MRPS31	mitochondrial ribosomal protein S31 [Source:HGNC Symbol;Acc:16632]	ENSG00000102738	ENSP00000315397	ENSMUSG00000031533	Mrps31
SMG5	smg-5 homolog, nonsense mediated mRNA decay factor (C. elegans) [Source:HGNC Symbol;Acc:24644]	ENSG00000198952	ENSP00000355261	ENSMUSG00000001415	Smg5
SART1	squamous cell carcinoma antigen recognized by T cells [Source:HGNC Symbol;Acc:10538]	ENSG00000175467	ENSP00000310448	ENSMUSG00000039148	Sart1
GEMIN2	gem (nuclear organelle) associated protein 2 [Source:HGNC Symbol;Acc:10884]	ENSG00000092208	ENSP00000308533	ENSMUSG00000060121	Gemin2
NR0B1	nuclear receptor subfamily 0, group B, member 1 [Source:HGNC Symbol;Acc:7960]	ENSG00000169297	ENSP00000368253	ENSMUSG00000025056	Nr0b1
DCP2	DCP2 decapping enzyme homolog (S. cerevisiae) [Source:HGNC Symbol;Acc:24452]	ENSG00000172795	ENSP00000425770	ENSMUSG00000024472	Dcp2
TAF15	TAF15 RNA polymerase II, TATA box binding protein (TBP)-associated factor, 68kDa [Source:HGNC Symbol;Acc:11547]	ENSG00000172660	ENSP00000466950	ENSMUSG00000020680	Taf15
EWSR1	Ewing sarcoma breakpoint region 1 [Source:HGNC Symbol;Acc:3508]	ENSG00000182944	ENSP00000330516	ENSMUSG00000009079	Ewsr1
FUS	fused in sarcoma [Source:HGNC Symbol;Acc:4010]	ENSG00000089280	ENSP00000455282	ENSMUSG00000030795	Fus
EDC4	enhancer of mRNA decapping 4 [Source:HGNC Symbol;Acc:17157]	ENSG00000038358	ENSP00000351811	ENSMUSG00000036270	Edc4
FBLL1	fibrillarin-like 1 [Source:HGNC Symbol;Acc:35458]	ENSG00000188573	ENSP00000473383	ENSMUSG00000051062	Fbll1
FBL	fibrillarin [Source:HGNC Symbol;Acc:3599]	ENSG00000105202	ENSP00000471867	ENSMUSG00000046865	Fbl
MRPS27	mitochondrial ribosomal protein S27 [Source:HGNC Symbol;Acc:14512]	ENSG00000113048	ENSP00000428120	ENSMUSG00000041632	Mrps27
ALKBH1	alkB, alkylation repair homolog 1 (E. coli) [Source:HGNC Symbol;Acc:17911]	ENSG00000100601	ENSP00000216489	ENSMUSG00000079036	Alkbh1
ZCCHC17	zinc finger, CCHC domain containing 17 [Source:HGNC Symbol;Acc:30246]	ENSG00000121766	ENSP00000444742	ENSMUSG00000028772	Zcchc17
MRPL49	mitochondrial ribosomal protein L49 [Source:HGNC Symbol;Acc:1176]	ENSG00000149792	ENSP00000279242	ENSMUSG00000007338	Mrpl49
RPL18	ribosomal protein L18 [Source:HGNC Symbol;Acc:10310]	ENSG00000063177	ENSP00000447001	ENSMUSG00000059070	Rpl18
RPS4X	ribosomal protein S4, X-linked [Source:HGNC Symbol;Acc:10424]	ENSG00000198034	ENSP00000362744	ENSMUSG00000031320	Rps4x
RPS4Y1	ribosomal protein S4, Y-linked 1 [Source:HGNC Symbol;Acc:10425]	ENSG00000129824	ENSP00000250784	#N/A	#N/A
RPS4Y2	ribosomal protein S4, Y-linked 2 [Source:HGNC Symbol;Acc:18501]	ENSG00000157828	ENSP00000288666	#N/A	#N/A
NOP14	NOP14 nucleolar protein [Source:HGNC Symbol;Acc:16821]	ENSG00000087269	ENSP00000405068	ENSMUSG00000036693	Nop14
KRR1	KRR1, small subunit (SSU) processome component, homolog (yeast) [Source:HGNC Symbol;Acc:5176]	ENSG00000111615	ENSP00000411740	ENSMUSG00000063334	Krr1
NCL	nucleolin [Source:HGNC Symbol;Acc:7667]	ENSG00000115053	ENSP00000318195	ENSMUSG00000026234	Ncl
PRPF18	PRP18 pre-mRNA processing factor 18 homolog (S. cerevisiae) [Source:HGNC Symbol;Acc:17351]	ENSG00000165630	ENSP00000367835	ENSMUSG00000039449	Prpf18
C1D	C1D nuclear receptor corepressor [Source:HGNC Symbol;Acc:29911]	ENSG00000197223	ENSP00000386468	ENSMUSG00000000581	C1d
ADAT3	adenosine deaminase, tRNA-specific 3 [Source:HGNC Symbol;Acc:25151]	ENSG00000213638	ENSP00000473571	ENSMUSG00000035370	Gm49322
UTP20	UTP20, small subunit (SSU) processome component, homolog (yeast) [Source:HGNC Symbol;Acc:17897]	ENSG00000120800	ENSP00000261637	ENSMUSG00000004356	Utp20
SNIP1	Smad nuclear interacting protein 1 [Source:HGNC Symbol;Acc:30587]	ENSG00000163877	ENSP00000296215	ENSMUSG00000050213	Snip1
GUF1	GUF1 GTPase homolog (S. cerevisiae) [Source:HGNC Symbol;Acc:25799]	ENSG00000151806	ENSP00000281543	ENSMUSG00000029208	Guf1
GCFC2	GC-rich sequence DNA-binding factor 2 [Source:HGNC Symbol;Acc:1317]	ENSG00000005436	ENSP00000318690	ENSMUSG00000035125	Gcfc2
UTP6	UTP6, small subunit (SSU) processome component, homolog (yeast) [Source:HGNC Symbol;Acc:18279]	ENSG00000108651	ENSP00000261708	ENSMUSG00000035575	Utp6
SRSF1	serine/arginine-rich splicing factor 1 [Source:HGNC Symbol;Acc:10780]	ENSG00000136450	ENSP00000258962	ENSMUSG00000018379	Srsf1
SRSF3	serine/arginine-rich splicing factor 3 [Source:HGNC Symbol;Acc:10785]	ENSG00000112081	ENSP00000344762	ENSMUSG00000071172	Srsf3
SRSF4	serine/arginine-rich splicing factor 4 [Source:HGNC Symbol;Acc:10786]	ENSG00000116350	ENSP00000362900	ENSMUSG00000028911	Srsf4
SRSF5	serine/arginine-rich splicing factor 5 [Source:HGNC Symbol;Acc:10787]	ENSG00000100650	ENSP00000451391	ENSMUSG00000021134	Srsf5
SRSF6	serine/arginine-rich splicing factor 6 [Source:HGNC Symbol;Acc:10788]	ENSG00000124193	ENSP00000244020	ENSMUSG00000016921	Srsf6
SRSF7	serine/arginine-rich splicing factor 7 [Source:HGNC Symbol;Acc:10789]	ENSG00000115875	ENSP00000386806	ENSMUSG00000024097	Srsf7
SRSF9	serine/arginine-rich splicing factor 9 [Source:HGNC Symbol;Acc:10791]	ENSG00000111786	ENSP00000229390	ENSMUSG00000029538	Srsf9
USB1	U6 snRNA biogenesis 1 [Source:HGNC Symbol;Acc:25792]	ENSG00000103005	ENSP00000457322	ENSMUSG00000031792	Usb1
NOL6	nucleolar protein family 6 (RNA-associated) [Source:HGNC Symbol;Acc:19910]	ENSG00000165271	ENSP00000368783	ENSMUSG00000028430	Nol6
PPIE	peptidylprolyl isomerase E (cyclophilin E) [Source:HGNC Symbol;Acc:9258]	ENSG00000084072	ENSP00000361918	ENSMUSG00000028651	Ppie
RRBP1	ribosome binding protein 1 homolog 180kDa (dog) [Source:HGNC Symbol;Acc:10448]	ENSG00000125844	ENSP00000367038	ENSMUSG00000027422	Rrbp1
SUZ12	SUZ12 polycomb repressive complex 2 subunit [Source:HGNC Symbol;Acc:17101]	ENSG00000178691	ENSP00000316578	ENSMUSG00000017548	Suz12
TERT	telomerase reverse transcriptase [Source:HGNC Symbol;Acc:11730]	ENSG00000164362	ENSP00000309572	ENSMUSG00000021611	Tert
MSL3	male-specific lethal 3 homolog (Drosophila) [Source:HGNC Symbol;Acc:7370]	ENSG00000005302	ENSP00000312244	ENSMUSG00000031358	Msl3
BICC1	bicaudal C homolog 1 (Drosophila) [Source:HGNC Symbol;Acc:19351]	ENSG00000122870	ENSP00000362993	ENSMUSG00000014329	Bicc1
MRPS16	mitochondrial ribosomal protein S16 [Source:HGNC Symbol;Acc:14048]	ENSG00000182180	ENSP00000362031	ENSMUSG00000049960	Mrps16
RBMX2	RNA binding motif protein, X-linked 2 [Source:HGNC Symbol;Acc:24282]	ENSG00000134597	ENSP00000339090	ENSMUSG00000031107	Rbmx2
MRPL40	mitochondrial ribosomal protein L40 [Source:HGNC Symbol;Acc:14491]	ENSG00000185608	ENSP00000333401	ENSMUSG00000022706	Mrpl40
ISG20	interferon stimulated exonuclease gene 20kDa [Source:HGNC Symbol;Acc:6130]	ENSG00000172183	ENSP00000306565	ENSMUSG00000039236	Isg20
ISG20L2	interferon stimulated exonuclease gene 20kDa-like 2 [Source:HGNC Symbol;Acc:25745]	ENSG00000143319	ENSP00000323424	ENSMUSG00000048039	Isg20l2
AEN	apoptosis enhancing nuclease [Source:HGNC Symbol;Acc:25722]	ENSG00000181026	ENSP00000453631	ENSMUSG00000030609	Aen
REXO4	REX4, RNA exonuclease 4 homolog (S. cerevisiae) [Source:HGNC Symbol;Acc:12820]	ENSG00000148300	ENSP00000361010	ENSMUSG00000052406	Rexo4
TGS1	trimethylguanosine synthase 1 [Source:HGNC Symbol;Acc:17843]	ENSG00000137574	ENSP00000260129	ENSMUSG00000028233	Tgs1
ZC3H4	zinc finger CCCH-type containing 4 [Source:HGNC Symbol;Acc:17808]	ENSG00000130749	ENSP00000469684	ENSMUSG00000059273	Zc3h4
ZC3H6	zinc finger CCCH-type containing 6 [Source:HGNC Symbol;Acc:24762]	ENSG00000188177	ENSP00000386764	ENSMUSG00000042851	Zc3h6
ZC3H8	zinc finger CCCH-type containing 8 [Source:HGNC Symbol;Acc:30941]	ENSG00000144161	ENSP00000386488	ENSMUSG00000027387	Zc3h8
RPL27A	ribosomal protein L27a [Source:HGNC Symbol;Acc:10329]	ENSG00000166441	ENSP00000431565	ENSMUSG00000046364	Rpl27a
RPS19	ribosomal protein S19 [Source:HGNC Symbol;Acc:10402]	ENSG00000105372	ENSP00000470972	ENSMUSG00000040952	Rps19
SYF2	SYF2 homolog, RNA splicing factor (S. cerevisiae) [Source:HGNC Symbol;Acc:19824]	ENSG00000117614	ENSP00000236273	ENSMUSG00000028821	Syf2
TFB1M	transcription factor B1, mitochondrial [Source:HGNC Symbol;Acc:17037]	ENSG00000029639	ENSP00000356134	ENSMUSG00000036983	Tfb1m
DIMT1	DIM1 dimethyladenosine transferase 1 homolog (S. cerevisiae) [Source:HGNC Symbol;Acc:30217]	ENSG00000086189	ENSP00000199320	ENSMUSG00000021692	Dimt1
TSEN34	tRNA splicing endonuclease 34 homolog (S. cerevisiae) [Source:HGNC Symbol;Acc:15506]	ENSG00000170892	ENSP00000379667	ENSMUSG00000035585	Tsen34
DCAF13	DDB1 and CUL4 associated factor 13 [Source:HGNC Symbol;Acc:24535]	ENSG00000164934	ENSP00000297579	ENSMUSG00000022300	Dcaf13
RPL9	ribosomal protein L9 [Source:HGNC Symbol;Acc:10369]	ENSG00000163682	ENSP00000400467	ENSMUSG00000081906	Rpl9-ps1
ARHGEF28	Rho guanine nucleotide exchange factor (GEF) 28 [Source:HGNC Symbol;Acc:30322] [Type: protein coding Ensembl/Havana merge]	ENSG00000214944	ENSP00000441913	ENSMUSG00000021662	Arhgef28
AC004381.6	Putative RNA exonuclease NEF-sp [Source:UniProtKB/Swiss-Prot;Acc:Q96IC2]	ENSG00000005189	ENSP00000261377	ENSMUSG00000030924	Rexo5
EIF4H	eukaryotic translation initiation factor 4H [Source:HGNC Symbol;Acc:12741]	ENSG00000263344	ENSP00000458302	ENSMUSG00000040731	Eif4h
EIF4B	eukaryotic translation initiation factor 4B [Source:HGNC Symbol;Acc:3285]	ENSG00000063046	ENSP00000450324	ENSMUSG00000058655	Eif4b
DDX54	DEAD (Asp-Glu-Ala-Asp) box polypeptide 54 [Source:HGNC Symbol;Acc:20084]	ENSG00000123064	ENSP00000323858	ENSMUSG00000029599	Ddx54
MRPS36	mitochondrial ribosomal protein S36 [Source:HGNC Symbol;Acc:16631]	ENSG00000134056	ENSP00000256441	ENSMUSG00000061474	Mrps36
PRPF40A	PRP40 pre-mRNA processing factor 40 homolog A (S. cerevisiae) [Source:HGNC Symbol;Acc:16463]	ENSG00000196504	ENSP00000386458	ENSMUSG00000061136	Prpf40a
PRPF40B	PRP40 pre-mRNA processing factor 40 homolog B (S. cerevisiae) [Source:HGNC Symbol;Acc:25031]	ENSG00000110844	ENSP00000448073	ENSMUSG00000023007	Prpf40b
EIF3L	eukaryotic translation initiation factor 3 subunit L isoform 2 [Source:RefSeq peptide;Acc:NP_001229852]	ENSG00000100129	ENSP00000416892	ENSMUSG00000033047	Eif3l
NOL8	nucleolar protein 8 [Source:HGNC Symbol;Acc:23387]	ENSG00000198000	ENSP00000401177	ENSMUSG00000021392	Nol8
MTO1	mitochondrial translation optimization 1 homolog (S. cerevisiae) [Source:HGNC Symbol;Acc:19261]	ENSG00000135297	ENSP00000359323	ENSMUSG00000032342	Mto1
PSMA1	proteasome (prosome, macropain) subunit, alpha type, 1 [Source:HGNC Symbol;Acc:9530]	ENSG00000129084	ENSP00000414359	ENSMUSG00000030751	Psma1
HTATSF1	HIV-1 Tat specific factor 1 [Source:HGNC Symbol;Acc:5276]	ENSG00000102241	ENSP00000218364	ENSMUSG00000067873	Htatsf1
FTSJ1	FtsJ RNA methyltransferase homolog 1 (E. coli) [Source:HGNC Symbol;Acc:13254]	ENSG00000269875	ENSP00000471096	ENSMUSG00000031171	Ftsj1
LAS1L	LAS1-like (S. cerevisiae) [Source:HGNC Symbol;Acc:25726]	ENSG00000001497	ENSP00000308649	ENSMUSG00000057421	Las1l
POP1	processing of precursor 1, ribonuclease P/MRP subunit (S. cerevisiae) [Source:HGNC Symbol;Acc:30129]	ENSG00000104356	ENSP00000385787	ENSMUSG00000022325	Pop1
DZIP3	DAZ interacting protein 3, zinc finger [Source:HGNC Symbol;Acc:30938]	ENSG00000198919	ENSP00000355028	ENSMUSG00000064061	Dzip3
DGCR14	DiGeorge syndrome critical region gene 14 [Source:HGNC Symbol;Acc:16817]	ENSG00000100056	ENSP00000252137	ENSMUSG00000003527	Ess2
CDK9	cyclin-dependent kinase 9 [Source:HGNC Symbol;Acc:1780]	ENSG00000136807	ENSP00000362361	ENSMUSG00000009555	Cdk9
PAN3	PAN3 poly(A) specific ribonuclease subunit homolog (S. cerevisiae) [Source:HGNC Symbol;Acc:29991]	ENSG00000152520	ENSP00000370345	ENSMUSG00000029647	Pan3
RPL29	ribosomal protein L29 [Source:HGNC Symbol;Acc:10331]	ENSG00000162244	ENSP00000420673	ENSMUSG00000048758	Rpl29
DCPS	decapping enzyme, scavenger [Source:HGNC Symbol;Acc:29812]	ENSG00000110063	ENSP00000263579	ENSMUSG00000032040	Dcps
MRP63	mitochondrial ribosomal protein 63 [Source:HGNC Symbol;Acc:14514]	ENSG00000173141	ENSP00000310726	ENSMUSG00000021967	Mrpl57
MRPL27	mitochondrial ribosomal protein L27 [Source:HGNC Symbol;Acc:14483]	ENSG00000108826	ENSP00000388915	ENSMUSG00000024414	Mrpl27
POLR2H	polymerase (RNA) II (DNA directed) polypeptide H [Source:HGNC Symbol;Acc:9195]	ENSG00000163882	ENSP00000392913	ENSMUSG00000021018	Polr2h
ZNF239	zinc finger protein 239 [Source:HGNC Symbol;Acc:13031]	ENSG00000196793	ENSP00000307774	ENSMUSG00000042097	Zfp239
XRN1	5'-3' exoribonuclease 1 [Source:HGNC Symbol;Acc:30654]	ENSG00000114127	ENSP00000418404	ENSMUSG00000032410	Xrn1
ZFR	zinc finger RNA binding protein [Source:HGNC Symbol;Acc:17277]	ENSG00000056097	ENSP00000265069	ENSMUSG00000022201	Zfr
ZFR2	zinc finger RNA binding protein 2 [Source:HGNC Symbol;Acc:29189]	ENSG00000105278	ENSP00000262961	ENSMUSG00000034949	Zfr2
AGFG1	ArfGAP with FG repeats 1 [Source:HGNC Symbol;Acc:5175]	ENSG00000173744	ENSP00000312059	ENSMUSG00000026159	Agfg1
NSA2	NSA2 ribosome biogenesis homolog (S. cerevisiae) [Source:HGNC Symbol;Acc:30728]	ENSG00000164346	ENSP00000296802	ENSMUSG00000060739	Nsa2
DDX10	DEAD (Asp-Glu-Ala-Asp) box polypeptide 10 [Source:HGNC Symbol;Acc:2735]	ENSG00000178105	ENSP00000432032	ENSMUSG00000053289	Ddx10
TBL3	transducin (beta)-like 3 [Source:HGNC Symbol;Acc:11587]	ENSG00000183751	ENSP00000454836	ENSMUSG00000040688	Tbl3
INTS2	integrator complex subunit 2 [Source:HGNC Symbol;Acc:29241]	ENSG00000108506	ENSP00000414237	ENSMUSG00000018068	Ints2
YBX1	Y box binding protein 1 [Source:HGNC Symbol;Acc:8014]	ENSG00000065978	ENSP00000361626	ENSMUSG00000028639	Ybx1
YBX2	Y box binding protein 2 [Source:HGNC Symbol;Acc:17948]	ENSG00000006047	ENSP00000007699	ENSMUSG00000018554	Ybx2
YBX3	cold shock domain protein A [Source:HGNC Symbol;Acc:2428]	ENSG00000060138	ENSP00000228251	ENSMUSG00000030189	Ybx3
SURF6	surfeit 6 [Source:HGNC Symbol;Acc:11478]	ENSG00000261306	ENSP00000457813	ENSMUSG00000036160	Surf6
THOC6	THO complex 6 homolog (Drosophila) [Source:HGNC Symbol;Acc:28369]	ENSG00000131652	ENSP00000326531	ENSMUSG00000041319	Thoc6
EIF3I	eukaryotic translation initiation factor 3, subunit I [Source:HGNC Symbol;Acc:3272]	ENSG00000084623	ENSP00000362688	ENSMUSG00000028798	Eif3i
STRAP	serine/threonine kinase receptor associated protein [Source:HGNC Symbol;Acc:30796]	ENSG00000023734	ENSP00000392270	ENSMUSG00000030224	Strap
RPL13	ribosomal protein L13 [Source:HGNC Symbol;Acc:10303]	ENSG00000167526	ENSP00000457686	ENSMUSG00000000740	Rpl13
RRP12	ribosomal RNA processing 12 homolog (S. cerevisiae) [Source:HGNC Symbol;Acc:29100]	ENSG00000052749	ENSP00000446184	ENSMUSG00000035049	Rrp12
MRPS2	mitochondrial ribosomal protein S2 [Source:HGNC Symbol;Acc:14495]	ENSG00000122140	ENSP00000360850	ENSMUSG00000035772	Mrps2
ZCCHC8	zinc finger, CCHC domain containing 8 [Source:HGNC Symbol;Acc:25265]	ENSG00000033030	ENSP00000337313	ENSMUSG00000029427	Zcchc8
EFTUD1	elongation factor Tu GTP binding domain containing 1 [Source:HGNC Symbol;Acc:25789]	ENSG00000140598	ENSP00000352418	ENSMUSG00000038563	Efl1
RPL35	ribosomal protein L35 [Source:HGNC Symbol;Acc:10344]	ENSG00000136942	ENSP00000259469	ENSMUSG00000062997	Rpl35
NSRP1	nuclear speckle splicing regulatory protein 1 [Source:HGNC Symbol;Acc:25305]	ENSG00000126653	ENSP00000465442	ENSMUSG00000037958	Nsrp1
RPUSD2	RNA pseudouridylate synthase domain containing 2 [Source:HGNC Symbol;Acc:24180]	ENSG00000166133	ENSP00000453036	ENSMUSG00000027324	Rpusd2
BCDIN3D	BCDIN3 domain containing [Source:HGNC Symbol;Acc:27050]	ENSG00000186666	ENSP00000335201	ENSMUSG00000037525	Bcdin3d
THUMPD1	THUMP domain containing 1 [Source:HGNC Symbol;Acc:23807]	ENSG00000066654	ENSP00000392282	ENSMUSG00000030942	Thumpd1
TRIM21	tripartite motif containing 21 [Source:HGNC Symbol;Acc:11312] [Type: protein coding Ensembl/Havana merge]	ENSG00000132109	ENSP00000254436	ENSMUSG00000030966	Trim21
RANBP17	RAN binding protein 17 [Source:HGNC Symbol;Acc:14428]	ENSG00000204764	ENSP00000427975	ENSMUSG00000040594	Ranbp17
XPO7	exportin 7 [Source:HGNC Symbol;Acc:14108]	ENSG00000130227	ENSP00000410249	ENSMUSG00000022100	Xpo7
TRMT12	tRNA methyltransferase 12 homolog (S. cerevisiae) [Source:HGNC Symbol;Acc:26091]	ENSG00000183665	ENSP00000329858	ENSMUSG00000037085	Trmt12
ACIN1	apoptotic chromatin condensation inducer 1 [Source:HGNC Symbol;Acc:17066]	ENSG00000100813	ENSP00000262710	ENSMUSG00000022185	Acin1
ZNF385A	zinc finger protein 385A [Source:HGNC Symbol;Acc:17521]	ENSG00000161642	ENSP00000448567	ENSMUSG00000000552	Zfp385a
RPL23	ribosomal protein L23 [Source:HGNC Symbol;Acc:10316]	ENSG00000125691	ENSP00000463894	ENSMUSG00000071415	Rpl23
EED	embryonic ectoderm development [Source:HGNC Symbol;Acc:3188]	ENSG00000074266	ENSP00000263360	ENSMUSG00000030619	Eed
DNTTIP2	deoxynucleotidyltransferase, terminal, interacting protein 2 [Source:HGNC Symbol;Acc:24013]	ENSG00000067334	ENSP00000411010	ENSMUSG00000039756	Dnttip2
SBDS	Shwachman-Bodian-Diamond syndrome [Source:HGNC Symbol;Acc:19440]	ENSG00000126524	ENSP00000246868	ENSMUSG00000025337	Sbds
DDX51	DEAD (Asp-Glu-Ala-Asp) box polypeptide 51 [Source:HGNC Symbol;Acc:20082]	ENSG00000185163	ENSP00000380495	ENSMUSG00000029504	Ddx51
RBM18	RNA binding motif protein 18 [Source:HGNC Symbol;Acc:28413]	ENSG00000119446	ENSP00000409315	ENSMUSG00000026889	Rbm18
IPO11	importin 11 [Source:HGNC Symbol;Acc:20628]	ENSG00000086200	ENSP00000427274	ENSMUSG00000042590	Ipo11
RPL22	ribosomal protein L22 [Source:HGNC Symbol;Acc:10315]	ENSG00000116251	ENSP00000466013	ENSMUSG00000028936	Rpl22
RPL22L1	ribosomal protein L22-like 1 [Source:HGNC Symbol;Acc:27610]	ENSG00000163584	ENSP00000419041	ENSMUSG00000039221	Rpl22l1
LCMT2	leucine carboxyl methyltransferase 2 [Source:HGNC Symbol;Acc:17558]	ENSG00000168806	ENSP00000307214	ENSMUSG00000074890	Lcmt2
ZC3H11A	zinc finger CCCH-type containing 11A [Source:HGNC Symbol;Acc:29093]	ENSG00000058673	ENSP00000406531	ENSMUSG00000116275	Zc3h11a
FYTTD1	forty-two-three domain containing 1 [Source:HGNC Symbol;Acc:25407]	ENSG00000122068	ENSP00000241502	ENSMUSG00000022800	Fyttd1
RNPS1	RNA binding protein S1, serine-rich domain [Source:HGNC Symbol;Acc:10080]	ENSG00000205937	ENSP00000455306	ENSMUSG00000034681	Rnps1
RPS23	ribosomal protein S23 [Source:HGNC Symbol;Acc:10410]	ENSG00000186468	ENSP00000296674	ENSMUSG00000049517	Rps23
RNASEH2A	ribonuclease H2, subunit A [Source:HGNC Symbol;Acc:18518]	ENSG00000104889	ENSP00000221486	ENSMUSG00000052926	Rnaseh2a
FRG1B	FSHD region gene 1 family, member B [Source:HGNC Symbol;Acc:15792]	ENSG00000149531	ENSP00000351249	#N/A	#N/A
FRG1	FSHD region gene 1 [Source:HGNC Symbol;Acc:3954]	ENSG00000260380	ENSP00000455022	ENSMUSG00000031590	Frg1
NOL7	nucleolar protein 7, 27kDa [Source:HGNC Symbol;Acc:21040]	ENSG00000225921	ENSP00000405674	ENSMUSG00000063200	Nol7
PRPF38A	PRP38 pre-mRNA processing factor 38 (yeast) domain containing A [Source:HGNC Symbol;Acc:25930]	ENSG00000134748	ENSP00000257181	ENSMUSG00000063800	Prpf38a
RBM41	RNA binding motif protein 41 [Source:HGNC Symbol;Acc:25617]	ENSG00000089682	ENSP00000361557	ENSMUSG00000031433	Rbm41
RBM12	RNA binding motif protein 12 [Source:HGNC Symbol;Acc:9898]	ENSG00000244462	ENSP00000352668	ENSMUSG00000089824	Rbm12
RBM12B	RNA binding motif protein 12B [Source:HGNC Symbol;Acc:32310]	ENSG00000183808	ENSP00000427729	ENSMUSG00000046667	Rbm12b1
ESRP1	epithelial splicing regulatory protein 1 [Source:HGNC Symbol;Acc:25966]	ENSG00000104413	ENSP00000430118	ENSMUSG00000040728	Esrp1
ESRP2	epithelial splicing regulatory protein 2 [Source:HGNC Symbol;Acc:26152]	ENSG00000103067	ENSP00000454554	ENSMUSG00000084128	Esrp2
HNRNPF	heterogeneous nuclear ribonucleoprotein F [Source:HGNC Symbol;Acc:5039]	ENSG00000169813	ENSP00000400433	ENSMUSG00000042079	Hnrnpf
HNRNPH1	heterogeneous nuclear ribonucleoprotein H1 (H) [Source:HGNC Symbol;Acc:5041]	ENSG00000169045	ENSP00000377082	ENSMUSG00000007850	Hnrnph1
HNRNPH2	heterogeneous nuclear ribonucleoprotein H2 (H') [Source:HGNC Symbol;Acc:5042]	ENSG00000126945	ENSP00000361927	ENSMUSG00000045427	Hnrnph2
HNRNPH3	heterogeneous nuclear ribonucleoprotein H3 (2H9) [Source:HGNC Symbol;Acc:5043]	ENSG00000096746	ENSP00000265866	ENSMUSG00000020069	Hnrnph3
GRSF1	G-rich RNA sequence binding factor 1 [Source:HGNC Symbol;Acc:4610]	ENSG00000132463	ENSP00000254799	ENSMUSG00000044221	Grsf1
RNH1	ribonuclease/angiogenin inhibitor 1 [Source:HGNC Symbol;Acc:10074]	ENSG00000023191	ENSP00000433999	ENSMUSG00000038650	Rnh1
NOL9	nucleolar protein 9 [Source:HGNC Symbol;Acc:26265]	ENSG00000162408	ENSP00000366934	ENSMUSG00000028948	Nol9
SRFBP1	serum response factor binding protein 1 [Source:HGNC Symbol;Acc:26333]	ENSG00000151304	ENSP00000341324	ENSMUSG00000024528	Srfbp1
ARL6IP4	ADP-ribosylation-like factor 6 interacting protein 4 [Source:HGNC Symbol;Acc:18076]	ENSG00000182196	ENSP00000376230	ENSMUSG00000029404	Arl6ip4
RPP40	ribonuclease P/MRP 40kDa subunit [Source:HGNC Symbol;Acc:20992]	ENSG00000124787	ENSP00000317998	ENSMUSG00000021418	Rpp40
ALKBH5	alkB, alkylation repair homolog 5 (E. coli) [Source:HGNC Symbol;Acc:25996]	ENSG00000091542	ENSP00000382091	ENSMUSG00000042650	Alkbh5
SMG7	smg-7 homolog, nonsense mediated mRNA decay factor (C. elegans) [Source:HGNC Symbol;Acc:16792]	ENSG00000116698	ENSP00000425133	ENSMUSG00000042772	Smg7
PDE12	phosphodiesterase 12 [Source:HGNC Symbol;Acc:25386]	ENSG00000174840	ENSP00000309142	ENSMUSG00000043702	Pde12
CCRN4L	CCR4 carbon catabolite repression 4-like (S. cerevisiae) [Source:HGNC Symbol;Acc:14254]	ENSG00000151014	ENSP00000280614	ENSMUSG00000023087	Noct
ANGEL1	angel homolog 1 (Drosophila) [Source:HGNC Symbol;Acc:19961]	ENSG00000013523	ENSP00000451534	ENSMUSG00000021257	Angel1
ANGEL2	angel homolog 2 (Drosophila) [Source:HGNC Symbol;Acc:30534]	ENSG00000174606	ENSP00000438141	ENSMUSG00000026634	Angel2
CNOT6	CCR4-NOT transcription complex, subunit 6 [Source:HGNC Symbol;Acc:14099]	ENSG00000113300	ENSP00000261951	ENSMUSG00000020362	Cnot6
CNOT6L	CCR4-NOT transcription complex, subunit 6-like [Source:HGNC Symbol;Acc:18042]	ENSG00000138767	ENSP00000423750	ENSMUSG00000034724	Cnot6l
PDCD11	programmed cell death 11 [Source:HGNC Symbol;Acc:13408]	ENSG00000148843	ENSP00000358812	ENSMUSG00000025047	Pdcd11
RPL35A	ribosomal protein L35a [Source:HGNC Symbol;Acc:10345]	ENSG00000182899	ENSP00000419117	ENSMUSG00000060636	Rpl35a
MRPL21	mitochondrial ribosomal protein L21 [Source:HGNC Symbol;Acc:14479]	ENSG00000197345	ENSP00000389400	ENSMUSG00000024829	Mrpl21
SMG6	smg-6 homolog, nonsense mediated mRNA decay factor (C. elegans) [Source:HGNC Symbol;Acc:17809]	ENSG00000070366	ENSP00000263073	ENSMUSG00000038290	Smg6
PRPF19	PRP19/PSO4 pre-mRNA processing factor 19 homolog (S. cerevisiae) [Source:HGNC Symbol;Acc:17896]	ENSG00000110107	ENSP00000227524	ENSMUSG00000024735	Prpf19
PRPF4	PRP4 pre-mRNA processing factor 4 homolog (yeast) [Source:HGNC Symbol;Acc:17349]	ENSG00000136875	ENSP00000363313	ENSMUSG00000066148	Prpf4
INTS4	integrator complex subunit 4 [Source:HGNC Symbol;Acc:25048]	ENSG00000149262	ENSP00000434466	ENSMUSG00000025133	Ints4
SRPK2	SRSF protein kinase 2 [Source:HGNC Symbol;Acc:11306]	ENSG00000135250	ENSP00000349863	ENSMUSG00000062604	Srpk2
SUPV3L1	suppressor of var1, 3-like 1 (S. cerevisiae) [Source:HGNC Symbol;Acc:11471]	ENSG00000156502	ENSP00000352678	ENSMUSG00000020079	Supv3l1
RBM17	RNA binding motif protein 17 [Source:HGNC Symbol;Acc:16944]	ENSG00000134453	ENSP00000369218	ENSMUSG00000037197	Rbm17
NAF1	nuclear assembly factor 1 homolog (S. cerevisiae) [Source:HGNC Symbol;Acc:25126]	ENSG00000145414	ENSP00000274054	ENSMUSG00000014907	Naf1
YARS	tyrosyl-tRNA synthetase [Source:HGNC Symbol;Acc:12840]	ENSG00000134684	ENSP00000362576	ENSMUSG00000028811	Yars
LRRFIP1	leucine rich repeat (in FLII) interacting protein 1 [Source:HGNC Symbol;Acc:6702]	ENSG00000124831	ENSP00000310109	ENSMUSG00000026305	Lrrfip1
LRRFIP2	leucine rich repeat (in FLII) interacting protein 2 [Source:HGNC Symbol;Acc:6703]	ENSG00000093167	ENSP00000392217	ENSMUSG00000032497	Lrrfip2
EIF4E2	eukaryotic translation initiation factor 4E family member 2 [Source:HGNC Symbol;Acc:3293]	ENSG00000135930	ENSP00000258416	ENSMUSG00000026254	Eif4e2
EIF4E1B	eukaryotic translation initiation factor 4E family member 1B [Source:HGNC Symbol;Acc:33179]	ENSG00000175766	ENSP00000422420	ENSMUSG00000074895	Eif4e1b
EIF4E3	eukaryotic translation initiation factor 4E family member 3 [Source:HGNC Symbol;Acc:31837]	ENSG00000163412	ENSP00000374476	ENSMUSG00000093661	Eif4e3
EIF4E	eukaryotic translation initiation factor 4E [Source:HGNC Symbol;Acc:3287]	ENSG00000151247	ENSP00000425561	ENSMUSG00000028156	Eif4e
BUD13	BUD13 homolog (S. cerevisiae) [Source:HGNC Symbol;Acc:28199]	ENSG00000137656	ENSP00000260210	ENSMUSG00000032077	Bud13
CTU1	cytosolic thiouridylase subunit 1 homolog (S. pombe) [Source:HGNC Symbol;Acc:29590]	ENSG00000142544	ENSP00000390011	ENSMUSG00000038888	Ctu1
GTPBP1	GTP binding protein 1 [Source:HGNC Symbol;Acc:4669]	ENSG00000100226	ENSP00000216044	ENSMUSG00000042535	Gtpbp1
GTPBP2	GTP binding protein 2 [Source:HGNC Symbol;Acc:4670]	ENSG00000172432	ENSP00000304893	ENSMUSG00000023952	Gtpbp2
MTERFD2	MTERF domain containing 2 [Source:HGNC Symbol;Acc:28785]	ENSG00000122085	ENSP00000375840	ENSMUSG00000026273	Mterf4
SRPR	signal recognition particle receptor (docking protein) [Source:HGNC Symbol;Acc:11307]	ENSG00000182934	ENSP00000435508	ENSMUSG00000032042	Srpr
DDX50	DEAD (Asp-Glu-Ala-Asp) box polypeptide 50 [Source:HGNC Symbol;Acc:17906]	ENSG00000107625	ENSP00000362687	ENSMUSG00000020076	Ddx50
DDX21	DEAD (Asp-Glu-Ala-Asp) box helicase 21 [Source:HGNC Symbol;Acc:2744]	ENSG00000165732	ENSP00000346120	ENSMUSG00000020075	Ddx21
ZCRB1	zinc finger CCHC-type and RNA binding motif 1 [Source:HGNC Symbol;Acc:29620]	ENSG00000139168	ENSP00000266529	ENSMUSG00000022635	Zcrb1
RPL13A	ribosomal protein L13a [Source:HGNC Symbol;Acc:10304]	ENSG00000142541	ENSP00000375730	ENSMUSG00000074129	Rpl13a
SRA1	steroid receptor RNA activator 1 [Source:HGNC Symbol;Acc:11281]	ENSG00000213523	ENSP00000473378	ENSMUSG00000006050	Sra1
PAPOLB	poly(A) polymerase beta (testis specific) [Source:HGNC Symbol;Acc:15970]	ENSG00000218823	ENSP00000384700	ENSMUSG00000074817	Papolb
PAPOLG	poly(A) polymerase gamma [Source:HGNC Symbol;Acc:14982]	ENSG00000115421	ENSP00000238714	ENSMUSG00000020273	Papolg
PAPOLA	poly(A) polymerase alpha [Source:HGNC Symbol;Acc:14981]	ENSG00000090060	ENSP00000450534	ENSMUSG00000021111	Papola
RPL41	ribosomal protein L41 [Source:HGNC Symbol;Acc:10354]	ENSG00000229117	ENSP00000420821	ENSMUSG00000093674	Rpl41
ZNF768	zinc finger protein 768 [Source:HGNC Symbol;Acc:26273]	ENSG00000169957	ENSP00000369777	ENSMUSG00000047371	Zfp768
SCAF1	SR-related CTD-associated factor 1 [Source:HGNC Symbol;Acc:30403] [Type: protein coding Ensembl/Havana merge]	ENSG00000126461	ENSP00000353769	ENSMUSG00000038406	Scaf1
MRPS15	mitochondrial ribosomal protein S15 [Source:HGNC Symbol;Acc:14504]	ENSG00000116898	ENSP00000362208	ENSMUSG00000028861	Mrps15
RNASET2	ribonuclease T2 [Source:HGNC Symbol;Acc:21686]	ENSG00000026297	ENSP00000426455	ENSMUSG00000094724	Rnaset2b
EIF2B1	eukaryotic translation initiation factor 2B, subunit 1 alpha, 26kDa [Source:HGNC Symbol;Acc:3257]	ENSG00000111361	ENSP00000443172	ENSMUSG00000029388	Eif2b1
RPL36A	ribosomal protein L36a [Source:HGNC Symbol;Acc:10359]	ENSG00000269315	ENSP00000470206	ENSMUSG00000079435	Rpl36a
RPL36AL	ribosomal protein L36a-like [Source:HGNC Symbol;Acc:10346]	ENSG00000165502	ENSP00000346012	ENSMUSG00000104043	Gm6525
DDX26B	DEAD/H (Asp-Glu-Ala-Asp/His) box polypeptide 26B [Source:HGNC Symbol;Acc:27334]	ENSG00000165359	ENSP00000359788	ENSMUSG00000035967	Ints6l
INTS6	integrator complex subunit 6 [Source:HGNC Symbol;Acc:14879]	ENSG00000102786	ENSP00000310260	ENSMUSG00000035161	Ints6
RPS7	ribosomal protein S7 [Source:HGNC Symbol;Acc:10440]	ENSG00000171863	ENSP00000385018	ENSMUSG00000061477	Rps7
RRNAD1	ribosomal RNA adenine dimethylase domain containing 1 [Source:HGNC Symbol;Acc:24273]	ENSG00000143303	ENSP00000357199	ENSMUSG00000004896	Rrnad1
MRPS21	mitochondrial ribosomal protein S21 [Source:HGNC Symbol;Acc:14046]	ENSG00000187145	ENSP00000358080	ENSMUSG00000054312	Mrps21
SETD7	SET domain containing (lysine methyltransferase) 7 [Source:HGNC Symbol;Acc:30412]	ENSG00000145391	ENSP00000274031	ENSMUSG00000037111	Setd7
RBM8A	RNA binding motif protein 8A [Source:HGNC Symbol;Acc:9905]	ENSG00000131795	ENSP00000333001	ENSMUSG00000038374	Rbm8a
MAGOH	mago-nashi homolog, proliferation-associated (Drosophila) [Source:HGNC Symbol;Acc:6815]	ENSG00000162385	ENSP00000360525	ENSMUSG00000028609	Magoh
MAGOHB	mago-nashi homolog B (Drosophila) [Source:HGNC Symbol;Acc:25504]	ENSG00000111196	ENSP00000371305	ENSMUSG00000030188	Magohb
RPL37A	ribosomal protein L37a [Source:HGNC Symbol;Acc:10348]	ENSG00000197756	ENSP00000470348	ENSMUSG00000046330	RPL37a
NOLC1	nucleolar and coiled-body phosphoprotein 1 [Source:HGNC Symbol;Acc:15608]	ENSG00000166197	ENSP00000359024	ENSMUSG00000015176	Nolc1
IARS2	isoleucyl-tRNA synthetase 2, mitochondrial [Source:HGNC Symbol;Acc:29685]	ENSG00000067704	ENSP00000303279	ENSMUSG00000026618	Iars2
LSM1	LSM1 homolog, U6 small nuclear RNA associated (S. cerevisiae) [Source:HGNC Symbol;Acc:20472]	ENSG00000175324	ENSP00000310596	ENSMUSG00000037296	Lsm1
SUPT4H1	suppressor of Ty 4 homolog 1 (S. cerevisiae) [Source:HGNC Symbol;Acc:11467]	ENSG00000213246	ENSP00000462100	ENSMUSG00000020485	Supt4a
EXO1	exonuclease 1 [Source:HGNC Symbol;Acc:3511]	ENSG00000174371	ENSP00000355506	ENSMUSG00000039748	Exo1
DCP1B	DCP1 decapping enzyme homolog B (S. cerevisiae) [Source:HGNC Symbol;Acc:24451]	ENSG00000151065	ENSP00000280665	ENSMUSG00000041477	Dcp1b
DCP1A	decapping mRNA 1A [Source:HGNC Symbol;Acc:18714]	ENSG00000162290	ENSP00000475920	ENSMUSG00000021962	Dcp1a
DNAJC17	DnaJ (Hsp40) homolog, subfamily C, member 17 [Source:HGNC Symbol;Acc:25556]	ENSG00000104129	ENSP00000220496	ENSMUSG00000034278	Dnajc17
RNGTT	RNA guanylyltransferase and 5'-phosphatase [Source:HGNC Symbol;Acc:10073]	ENSG00000111880	ENSP00000442609	ENSMUSG00000028274	Rngtt
DUSP11	dual specificity phosphatase 11 (RNA/RNP complex 1-interacting) [Source:HGNC Symbol;Acc:3066]	ENSG00000144048	ENSP00000272444	ENSMUSG00000030002	Dusp11
CHERP	calcium homeostasis endoplasmic reticulum protein [Source:HGNC Symbol;Acc:16930]	ENSG00000085872	ENSP00000439856	ENSMUSG00000052488	Cherp
WDR61	WD repeat domain 61 [Source:HGNC Symbol;Acc:30300]	ENSG00000140395	ENSP00000267973	ENSMUSG00000061559	Wdr61
NANOS1	nanos homolog 1 (Drosophila) [Source:HGNC Symbol;Acc:23044]	ENSG00000188613	ENSP00000345924	ENSMUSG00000072437	Nanos1
NANOS2	nanos homolog 2 (Drosophila) [Source:HGNC Symbol;Acc:23292]	ENSG00000188425	ENSP00000341021	ENSMUSG00000051965	Nanos2
NANOS3	nanos homolog 3 (Drosophila) [Source:HGNC Symbol;Acc:22048]	ENSG00000187556	ENSP00000341992	ENSMUSG00000056155	Nanos3
EBNA1BP2	EBNA1 binding protein 2 [Source:HGNC Symbol;Acc:15531]	ENSG00000117395	ENSP00000236051	ENSMUSG00000028729	Ebna1bp2
HELZ	helicase with zinc finger [Source:HGNC Symbol;Acc:16878]	ENSG00000198265	ENSP00000464512	ENSMUSG00000020721	Helz
RNMTL1	RNA methyltransferase like 1 [Source:HGNC Symbol;Acc:18485]	ENSG00000171861	ENSP00000306080	ENSMUSG00000038046	Mrm3
PDCD4	programmed cell death 4 (neoplastic transformation inhibitor) [Source:HGNC Symbol;Acc:8763]	ENSG00000150593	ENSP00000280154	ENSMUSG00000024975	Pdcd4
PTRH2	peptidyl-tRNA hydrolase 2 [Source:HGNC Symbol;Acc:24265]	ENSG00000141378	ENSP00000464327	ENSMUSG00000072582	Ptrh2
SART3	squamous cell carcinoma antigen recognized by T cells 3 [Source:HGNC Symbol;Acc:16860]	ENSG00000075856	ENSP00000228284	ENSMUSG00000018974	Sart3
ZC3H10	zinc finger CCCH-type containing 10 [Source:HGNC Symbol;Acc:25893]	ENSG00000135482	ENSP00000257940	ENSMUSG00000039810	Zc3h10
LSM2	LSM2 homolog, U6 small nuclear RNA associated (S. cerevisiae) [Source:HGNC Symbol;Acc:13940]	ENSG00000224979	ENSP00000414006	ENSMUSG00000007050	Lsm2
MRPS25	mitochondrial ribosomal protein S25 [Source:HGNC Symbol;Acc:14511]	ENSG00000131368	ENSP00000253686	ENSMUSG00000014551	Mrps25
RPP21	ribonuclease P/MRP 21kDa subunit [Source:HGNC Symbol;Acc:21300]	ENSG00000241863	ENSP00000408610	ENSMUSG00000024446	Rpp21
ZMAT2	zinc finger, matrin-type 2 [Source:HGNC Symbol;Acc:26433]	ENSG00000146007	ENSP00000473397	ENSMUSG00000001383	Zmat2
IFIT1	interferon-induced protein with tetratricopeptide repeats 1 [Source:HGNC Symbol;Acc:5407]	ENSG00000185745	ENSP00000360869	ENSMUSG00000034459	Ifit1
IFIT2	interferon-induced protein with tetratricopeptide repeats 2 [Source:HGNC Symbol;Acc:5409]	ENSG00000119922	ENSP00000360891	ENSMUSG00000045932	Ifit2
IFIT5	interferon-induced protein with tetratricopeptide repeats 5 [Source:HGNC Symbol;Acc:13328]	ENSG00000152778	ENSP00000360860	#N/A	#N/A
IFIT1B	interferon-induced protein with tetratricopeptide repeats 1B [Source:HGNC Symbol;Acc:23442]	ENSG00000204010	ENSP00000360874	ENSMUSG00000067297	Ifit1bl2
IFIT3	interferon-induced protein with tetratricopeptide repeats 3 [Source:HGNC Symbol;Acc:5411]	ENSG00000119917	ENSP00000360883	ENSMUSG00000062488	Ifit3b
NOVA1	neuro-oncological ventral antigen 1 [Source:HGNC Symbol;Acc:7886]	ENSG00000139910	ENSP00000438875	ENSMUSG00000021047	Nova1
NOVA2	neuro-oncological ventral antigen 2 [Source:HGNC Symbol;Acc:7887]	ENSG00000104967	ENSP00000263257	ENSMUSG00000030411	Nova2
SNRPD3	small nuclear ribonucleoprotein D3 polypeptide 18kDa [Source:HGNC Symbol;Acc:11160]	ENSG00000100028	ENSP00000215829	ENSMUSG00000020180	Snrpd3
YARS2	tyrosyl-tRNA synthetase 2, mitochondrial [Source:HGNC Symbol;Acc:24249]	ENSG00000139131	ENSP00000320658	ENSMUSG00000022792	Yars2
PTCD1	pentatricopeptide repeat domain 1 [Source:HGNC Symbol;Acc:22198] [Type: protein coding Ensembl/Havana merge]	ENSG00000106246	ENSP00000292478	ENSMUSG00000029624	Ptcd1
TSR1	TSR1, 20S rRNA accumulation, homolog (S. cerevisiae) [Source:HGNC Symbol;Acc:25542]	ENSG00000167721	ENSP00000301364	ENSMUSG00000038335	Tsr1
MRPS6	mitochondrial ribosomal protein S6 [Source:HGNC Symbol;Acc:14051]	ENSG00000243927	ENSP00000382250	ENSMUSG00000039680	Mrps6
TAF9	TAF9 RNA polymerase II, TATA box binding protein (TBP)-associated factor, 32kDa [Source:HGNC Symbol;Acc:11542]	ENSG00000085231	ENSP00000370193	ENSMUSG00000052293	Taf9
RPL11	ribosomal protein L11 [Source:HGNC Symbol;Acc:10301]	ENSG00000142676	ENSP00000398888	ENSMUSG00000059291	Rpl11
DDX23	DEAD (Asp-Glu-Ala-Asp) box polypeptide 23 [Source:HGNC Symbol;Acc:17347]	ENSG00000174243	ENSP00000310723	ENSMUSG00000003360	Ddx23
DDX59	DEAD (Asp-Glu-Ala-Asp) box polypeptide 59 [Source:HGNC Symbol;Acc:25360]	ENSG00000118197	ENSP00000356317	ENSMUSG00000026404	Ddx59
CCNT2	cyclin T2 [Source:HGNC Symbol;Acc:1600	ENSG00000082258	ENSP00000264157	ENSMUSG00000026349	Ccnt2
CCNT1	cyclin T1 [Source:HGNC Symbol;Acc:1599]	ENSG00000129315	ENSP00000261900	ENSMUSG00000011960	Ccnt1
RPL8	ribosomal protein L8 [Source:HGNC Symbol;Acc:10368]	ENSG00000161016	ENSP00000435313	ENSMUSG00000003970	Rpl8
SARNP	SAP domain containing ribonucleoprotein [Source:HGNC Symbol;Acc:24432]	ENSG00000205323	ENSP00000337632	ENSMUSG00000078427	Sarnp
IMP3	IMP3, U3 small nucleolar ribonucleoprotein, homolog (yeast) [Source:HGNC Symbol;Acc:14497]	ENSG00000177971	ENSP00000326981	ENSMUSG00000032288	Imp3
SRRM4	serine/arginine repetitive matrix 4 [Source:HGNC Symbol;Acc:29389]	ENSG00000139767	ENSP00000267260	ENSMUSG00000063919	Srrm4
CNP	2',3'-cyclic nucleotide 3' phosphodiesterase [Source:HGNC Symbol;Acc:2158]	ENSG00000173786	ENSP00000377470	ENSMUSG00000006782	Cnp
LIN28A	lin-28 homolog A (C. elegans) [Source:HGNC Symbol;Acc:15986]	ENSG00000131914	ENSP00000254231	ENSMUSG00000050966	Lin28a
LIN28B	lin-28 homolog B (C. elegans) [Source:HGNC Symbol;Acc:32207]	ENSG00000187772	ENSP00000344401	ENSMUSG00000063804	Lin28b
EIF3K	eukaryotic translation initiation factor 3, subunit K [Source:HGNC Symbol;Acc:24656]	ENSG00000178982	ENSP00000248342	ENSMUSG00000053565	Eif3k
SF3B14	Pre-mRNA branch site protein p14 [Source:UniProtKB/Swiss-Prot;Acc:Q9Y3B4]	ENSG00000115128	ENSP00000233468	ENSMUSG00000037361	Sf3b6
EIF2S2	eukaryotic translation initiation factor 2, subunit 2 beta, 38kDa [Source:HGNC Symbol;Acc:3266]	ENSG00000125977	ENSP00000364119	ENSMUSG00000074656	Eif2s2
RNMT	RNA (guanine-7-) methyltransferase [Source:HGNC Symbol;Acc:10075]	ENSG00000101654	ENSP00000372804	ENSMUSG00000009535	Rnmt
MRPL42	mitochondrial ribosomal protein L42 [Source:HGNC Symbol;Acc:14493]	ENSG00000198015	ENSP00000449884	ENSMUSG00000062981	Mrpl42
THRAP3	thyroid hormone receptor associated protein 3 [Source:HGNC Symbol;Acc:22964]	ENSG00000054118	ENSP00000433825	ENSMUSG00000043962	Thrap3
BCLAF1	BCL2-associated transcription factor 1 [Source:HGNC Symbol;Acc:16863]	ENSG00000029363	ENSP00000376159	ENSMUSG00000037608	Bclaf1
CXorf23	chromosome X open reading frame 23 [Source:HGNC Symbol;Acc:27413]	ENSG00000173681	ENSP00000349470	ENSMUSG00000044150	Bclaf3
PNO1	partner of NOB1 homolog (S. cerevisiae) [Source:HGNC Symbol;Acc:32790]	ENSG00000115946	ENSP00000263657	ENSMUSG00000020116	Pno1
RBM4	RNA binding motif protein 4 [Source:HGNC Symbol;Acc:9901]	ENSG00000173933	ENSP00000309166	ENSMUSG00000096370	Gm21992
RBM4B	RNA binding motif protein 4B [Source:HGNC Symbol;Acc:28842]	ENSG00000173914	ENSP00000310471	ENSMUSG00000033760	Rbm4b
RBM14	RNA binding motif protein 14 [Source:HGNC Symbol;Acc:14219]	ENSG00000239306	ENSP00000311747	ENSMUSG00000006456	Rbm14
R3HCC1	R3H domain and coiled-coil containing 1 [Source:HGNC Symbol;Acc:27329]	ENSG00000104679	ENSP00000397555	ENSMUSG00000034194	R3hcc1
R3HCC1L	R3H domain and coiled-coil containing 1-like [Source:HGNC Symbol;Acc:23512]	ENSG00000166024	ENSP00000314018	ENSMUSG00000025184	R3hcc1l
KIAA0430	KIAA0430 [Source:HGNC Symbol;Acc:29562]	ENSG00000166783	ENSP00000379654	ENSMUSG00000060657	Marf1
POP5	processing of precursor 5, ribonuclease P/MRP subunit (S. cerevisiae) [Source:HGNC Symbol;Acc:17689]	ENSG00000167272	ENSP00000341791	ENSMUSG00000060152	Pop5
MRPL51	mitochondrial ribosomal protein L51 [Source:HGNC Symbol;Acc:14044]	ENSG00000111639	ENSP00000229238	ENSMUSG00000030335	Mrpl51
MARS	methionyl-tRNA synthetase [Source:HGNC Symbol;Acc:6898]	ENSG00000166986	ENSP00000262027	ENSMUSG00000040354	Mars1
TYW1	tRNA-yW synthesizing protein 1 homolog (S. cerevisiae) [Source:HGNC Symbol;Acc:25598]	ENSG00000198874	ENSP00000352645	ENSMUSG00000056310	Tyw1
MRPL16	mitochondrial ribosomal protein L16 [Source:HGNC Symbol;Acc:14476]	ENSG00000166902	ENSP00000436592	ENSMUSG00000024683	Mrpl16
DUS1L	dihydrouridine synthase 1-like (S. cerevisiae) [Source:HGNC Symbol;Acc:30086]	ENSG00000169718	ENSP00000445110	ENSMUSG00000025155	Dus1l
QRSL1	glutaminyl-tRNA synthase (glutamine-hydrolyzing)-like 1 [Source:HGNC Symbol;Acc:21020]	ENSG00000130348	ENSP00000358042	ENSMUSG00000019863	Qrsl1
WARS2	tryptophanyl tRNA synthetase 2, mitochondrial [Source:HGNC Symbol;Acc:12730]	ENSG00000116874	ENSP00000235521	ENSMUSG00000004233	Wars2
WRAP53	WD repeat containing, antisense to TP53 [Source:HGNC Symbol;Acc:25522]	ENSG00000141499	ENSP00000324203	ENSMUSG00000041346	Wrap53
RSL24D1	ribosomal L24 domain containing 1 [Source:HGNC Symbol;Acc:18479]	ENSG00000137876	ENSP00000454492	ENSMUSG00000032215	Rsl24d1
SF3B4	splicing factor 3b, subunit 4, 49kDa [Source:HGNC Symbol;Acc:10771]	ENSG00000143368	ENSP00000391114	ENSMUSG00000068856	Sf3b4
TDRD7	tudor domain containing 7 [Source:HGNC Symbol;Acc:30831]	ENSG00000196116	ENSP00000347444	ENSMUSG00000035517	Tdrd7
LARP1	La ribonucleoprotein domain family, member 1 [Source:HGNC Symbol;Acc:29531]	ENSG00000155506	ENSP00000336721	ENSMUSG00000037331	Larp1
LARP1B	La ribonucleoprotein domain family, member 1B [Source:HGNC Symbol;Acc:24704]	ENSG00000138709	ENSP00000422850	ENSMUSG00000025762	Larp1b
RPL23A	ribosomal protein L23a [Source:HGNC Symbol;Acc:10317]	ENSG00000198242	ENSP00000389103	ENSMUSG00000058546	Rpl23a
BAZ2A	bromodomain adjacent to zinc finger domain, 2A [Source:HGNC Symbol;Acc:962]	ENSG00000076108	ENSP00000446880	ENSMUSG00000040054	Baz2a
BAZ2B	bromodomain adjacent to zinc finger domain, 2B [Source:HGNC Symbol;Acc:963]	ENSG00000123636	ENSP00000376533	ENSMUSG00000026987	Baz2b
EIF3E	eukaryotic translation initiation factor 3, subunit E [Source:HGNC Symbol;Acc:3277]	ENSG00000104408	ENSP00000220849	ENSMUSG00000022336	Eif3e
CWC15	CWC15 spliceosome-associated protein homolog (S. cerevisiae) [Source:HGNC Symbol;Acc:26939]	ENSG00000261974	ENSP00000461115	ENSMUSG00000004096	Cwc15
TOP1	topoisomerase (DNA) I [Source:HGNC Symbol;Acc:11986]	ENSG00000198900	ENSP00000354522	ENSMUSG00000070544	Top1
RPL31	ribosomal protein L31 [Source:HGNC Symbol;Acc:10334]	ENSG00000071082	ENSP00000387120	ENSMUSG00000073702	Rpl31
SUPT6H	suppressor of Ty 6 homolog (S. cerevisiae) [Source:HGNC Symbol;Acc:11470]	ENSG00000109111	ENSP00000319104	ENSMUSG00000002052	Supt6
TST	thiosulfate sulfurtransferase (rhodanese) [Source:HGNC Symbol;Acc:12388]	ENSG00000128311	ENSP00000385828	ENSMUSG00000044986	Tst
HNRNPU	heterogeneous nuclear ribonucleoprotein U (scaffold attachment factor A) [Source:HGNC Symbol;Acc:5048]	ENSG00000153187	ENSP00000393151	ENSMUSG00000039630	Hnrnpu
HNRNPUL1	heterogeneous nuclear ribonucleoprotein U-like 1 [Source:HGNC Symbol;Acc:17011]	ENSG00000105323	ENSP00000375863	ENSMUSG00000040725	Hnrnpul1
HNRNPUL2	heterogeneous nuclear ribonucleoprotein U-like 2 [Source:HGNC Symbol;Acc:25451]	ENSG00000214753	ENSP00000301785	ENSMUSG00000118124	Gm50139
RPS25	ribosomal protein S25 [Source:HGNC Symbol;Acc:10413]	ENSG00000118181	ENSP00000435096	ENSMUSG00000009927	Rpl23a
MRPL23	mitochondrial ribosomal protein L23 [Source:HGNC Symbol;Acc:10322]	ENSG00000214026	ENSP00000370930	ENSMUSG00000037772	Mrpl23
EIF1AD	eukaryotic translation initiation factor 1A domain containing [Source:HGNC Symbol;Acc:28147]	ENSG00000175376	ENSP00000436644	ENSMUSG00000024841	Eif1ad
SETX	senataxin [Source:HGNC Symbol;Acc:445]	ENSG00000107290	ENSP00000224140	ENSMUSG00000043535	Setx
MARS2	methionyl-tRNA synthetase 2, mitochondrial [Source:HGNC Symbol;Acc:25133]	ENSG00000247626	ENSP00000282276	ENSMUSG00000046994	Mars2
CNOT3	CCR4-NOT transcription complex, subunit 3 [Source:HGNC Symbol;Acc:7879]	ENSG00000088038	ENSP00000383954	ENSMUSG00000035632	Cnot3
MTIF2	mitochondrial translational initiation factor 2 [Source:HGNC Symbol;Acc:7441]	ENSG00000085760	ENSP00000378099	ENSMUSG00000020459	Mtif2
JAKMIP1	janus kinase and microtubule interacting protein 1 [Source:HGNC Symbol;Acc:26460]	ENSG00000152969	ENSP00000386711	ENSMUSG00000063646	Jakmip1
FASTKD1	FAST kinase domains 1 [Source:HGNC Symbol;Acc:26150]	ENSG00000138399	ENSP00000400513	ENSMUSG00000027086	Fastkd1

## Sheet: Sheet1
Mouse_Gene_id
ENSMUSG00000000131
ENSMUSG00000000167
ENSMUSG00000000275
ENSMUSG00000000339
ENSMUSG00000000355
ENSMUSG00000000365
ENSMUSG00000000384
ENSMUSG00000000439
ENSMUSG00000000552
ENSMUSG00000000568
ENSMUSG00000000581
ENSMUSG00000000740
ENSMUSG00000000787
ENSMUSG00000000838
ENSMUSG00000000916
ENSMUSG00000001016
ENSMUSG00000001017
ENSMUSG00000001056
ENSMUSG00000001120
ENSMUSG00000001158
ENSMUSG00000001166
ENSMUSG00000001305
ENSMUSG00000001380
ENSMUSG00000001383
ENSMUSG00000001415
ENSMUSG00000001424
ENSMUSG00000001440
ENSMUSG00000001445
ENSMUSG00000001569
ENSMUSG00000001674
ENSMUSG00000001707
ENSMUSG00000001767
ENSMUSG00000001783
ENSMUSG00000001909
ENSMUSG00000001924
ENSMUSG00000002017
ENSMUSG00000002052
ENSMUSG00000002107
ENSMUSG00000002129
ENSMUSG00000002210
ENSMUSG00000002227
ENSMUSG00000002319
ENSMUSG00000002455
ENSMUSG00000002477
ENSMUSG00000002500
ENSMUSG00000002524
ENSMUSG00000002625
ENSMUSG00000002658
ENSMUSG00000002731
ENSMUSG00000002767
ENSMUSG00000002825
ENSMUSG00000003135
ENSMUSG00000003226
ENSMUSG00000003235
ENSMUSG00000003299
ENSMUSG00000003360
ENSMUSG00000003410
ENSMUSG00000003423
ENSMUSG00000003429
ENSMUSG00000003435
ENSMUSG00000003527
ENSMUSG00000003660
ENSMUSG00000003808
ENSMUSG00000003814
ENSMUSG00000003848
ENSMUSG00000003868
ENSMUSG00000003923
ENSMUSG00000003970
ENSMUSG00000004044
ENSMUSG00000004096
ENSMUSG00000004099
ENSMUSG00000004100
ENSMUSG00000004127
ENSMUSG00000004233
ENSMUSG00000004268
ENSMUSG00000004356
ENSMUSG00000004393
ENSMUSG00000004642
ENSMUSG00000004667
ENSMUSG00000004788
ENSMUSG00000004896
ENSMUSG00000004980
ENSMUSG00000005102
ENSMUSG00000005150
ENSMUSG00000005198
ENSMUSG00000005481
ENSMUSG00000005506
ENSMUSG00000005610
ENSMUSG00000005682
ENSMUSG00000005846
ENSMUSG00000006005
ENSMUSG00000006019
ENSMUSG00000006050
ENSMUSG00000006143
ENSMUSG00000006281
ENSMUSG00000006333
ENSMUSG00000006456
ENSMUSG00000006498
ENSMUSG00000006732
ENSMUSG00000006782
ENSMUSG00000006941
ENSMUSG00000007029
ENSMUSG00000007050
ENSMUSG00000007338
ENSMUSG00000007603
ENSMUSG00000007610
ENSMUSG00000007670
ENSMUSG00000007836
ENSMUSG00000007850
ENSMUSG00000007892
ENSMUSG00000008301
ENSMUSG00000008333
ENSMUSG00000008373
ENSMUSG00000008393
ENSMUSG00000008450
ENSMUSG00000008489
ENSMUSG00000008658
ENSMUSG00000008668
ENSMUSG00000008682
ENSMUSG00000008683
ENSMUSG00000009013
ENSMUSG00000009076
ENSMUSG00000009079
ENSMUSG00000009145
ENSMUSG00000009470
ENSMUSG00000009535
ENSMUSG00000009549
ENSMUSG00000009555
ENSMUSG00000009585
ENSMUSG00000009927
ENSMUSG00000010097
ENSMUSG00000010205
ENSMUSG00000010362
ENSMUSG00000010406
ENSMUSG00000010592
ENSMUSG00000010592
ENSMUSG00000010592
ENSMUSG00000010592
ENSMUSG00000010592
ENSMUSG00000010608
ENSMUSG00000010755
ENSMUSG00000011254
ENSMUSG00000011257
ENSMUSG00000011306
ENSMUSG00000011960
ENSMUSG00000012405
ENSMUSG00000012535
ENSMUSG00000012848
ENSMUSG00000013415
ENSMUSG00000013736
ENSMUSG00000014329
ENSMUSG00000014504
ENSMUSG00000014551
ENSMUSG00000014763
ENSMUSG00000014776
ENSMUSG00000014907
ENSMUSG00000014980
ENSMUSG00000015023
ENSMUSG00000015126
ENSMUSG00000015127
ENSMUSG00000015165
ENSMUSG00000015176
ENSMUSG00000015337
ENSMUSG00000015365
ENSMUSG00000015672
ENSMUSG00000015748
ENSMUSG00000015757
ENSMUSG00000016018
ENSMUSG00000016349
ENSMUSG00000016503
ENSMUSG00000016510
ENSMUSG00000016554
ENSMUSG00000016833
ENSMUSG00000016921
ENSMUSG00000017146
ENSMUSG00000017264
ENSMUSG00000017404
ENSMUSG00000017478
ENSMUSG00000017548
ENSMUSG00000017830
ENSMUSG00000017999
ENSMUSG00000018040
ENSMUSG00000018068
ENSMUSG00000018199
ENSMUSG00000018379
ENSMUSG00000018405
ENSMUSG00000018425
ENSMUSG00000018428
ENSMUSG00000018433
ENSMUSG00000018446
ENSMUSG00000018541
ENSMUSG00000018554
ENSMUSG00000018583
ENSMUSG00000018707
ENSMUSG00000018727
ENSMUSG00000018765
ENSMUSG00000018848
ENSMUSG00000018858
ENSMUSG00000018882
ENSMUSG00000018974
ENSMUSG00000018995
ENSMUSG00000019039
ENSMUSG00000019143
ENSMUSG00000019297
ENSMUSG00000019432
ENSMUSG00000019470
ENSMUSG00000019710
ENSMUSG00000019715
ENSMUSG00000019732
ENSMUSG00000019738
ENSMUSG00000019774
ENSMUSG00000019791
ENSMUSG00000019792
ENSMUSG00000019808
ENSMUSG00000019863
ENSMUSG00000019897
ENSMUSG00000019977
ENSMUSG00000020018
ENSMUSG00000020069
ENSMUSG00000020074
ENSMUSG00000020075
ENSMUSG00000020076
ENSMUSG00000020079
ENSMUSG00000020116
ENSMUSG00000020166
ENSMUSG00000020180
ENSMUSG00000020211
ENSMUSG00000020262
ENSMUSG00000020273
ENSMUSG00000020280
ENSMUSG00000020290
ENSMUSG00000020300
ENSMUSG00000020329
ENSMUSG00000020358
ENSMUSG00000020362
ENSMUSG00000020368
ENSMUSG00000020385
ENSMUSG00000020409
ENSMUSG00000020430
ENSMUSG00000020454
ENSMUSG00000020457
ENSMUSG00000020459
ENSMUSG00000020460
ENSMUSG00000020464
ENSMUSG00000020477
ENSMUSG00000020485
ENSMUSG00000020495
ENSMUSG00000020514
ENSMUSG00000020515
ENSMUSG00000020537
ENSMUSG00000020547
ENSMUSG00000020549
ENSMUSG00000020594
ENSMUSG00000020630
ENSMUSG00000020648
ENSMUSG00000020677
ENSMUSG00000020680
ENSMUSG00000020691
ENSMUSG00000020691
ENSMUSG00000020705
ENSMUSG00000020706
ENSMUSG00000020715
ENSMUSG00000020719
ENSMUSG00000020721
ENSMUSG00000020743
ENSMUSG00000020770
ENSMUSG00000020775
ENSMUSG00000020780
ENSMUSG00000020781
ENSMUSG00000020783
ENSMUSG00000020832
ENSMUSG00000020850
ENSMUSG00000020863
ENSMUSG00000020922
ENSMUSG00000020923
ENSMUSG00000020929
ENSMUSG00000020973
ENSMUSG00000020994
ENSMUSG00000021012
ENSMUSG00000021018
ENSMUSG00000021023
ENSMUSG00000021024
ENSMUSG00000021039
ENSMUSG00000021040
ENSMUSG00000021047
ENSMUSG00000021111
ENSMUSG00000021116
ENSMUSG00000021127
ENSMUSG00000021134
ENSMUSG00000021149
ENSMUSG00000021243
ENSMUSG00000021257
ENSMUSG00000021266
ENSMUSG00000021282
ENSMUSG00000021374
ENSMUSG00000021377
ENSMUSG00000021392
ENSMUSG00000021413
ENSMUSG00000021418
ENSMUSG00000021420
ENSMUSG00000021428
ENSMUSG00000021431
ENSMUSG00000021460
ENSMUSG00000021476
ENSMUSG00000021481
ENSMUSG00000021494
ENSMUSG00000021500
ENSMUSG00000021532
ENSMUSG00000021540
ENSMUSG00000021546
ENSMUSG00000021595
ENSMUSG00000021607
ENSMUSG00000021611
ENSMUSG00000021621
ENSMUSG00000021645
ENSMUSG00000021645
ENSMUSG00000021650
ENSMUSG00000021662
ENSMUSG00000021666
ENSMUSG00000021692
ENSMUSG00000021713
ENSMUSG00000021715
ENSMUSG00000021731
ENSMUSG00000021758
ENSMUSG00000021838
ENSMUSG00000021872
ENSMUSG00000021876
ENSMUSG00000021880
ENSMUSG00000021932
ENSMUSG00000021938
ENSMUSG00000021952
ENSMUSG00000021958
ENSMUSG00000021962
ENSMUSG00000021967
ENSMUSG00000021975
ENSMUSG00000022000
ENSMUSG00000022009
ENSMUSG00000022012
ENSMUSG00000022019
ENSMUSG00000022022
ENSMUSG00000022023
ENSMUSG00000022100
ENSMUSG00000022119
ENSMUSG00000022139
ENSMUSG00000022160
ENSMUSG00000022185
ENSMUSG00000022191
ENSMUSG00000022201
ENSMUSG00000022204
ENSMUSG00000022205
ENSMUSG00000022241
ENSMUSG00000022247
ENSMUSG00000022283
ENSMUSG00000022283
ENSMUSG00000022300
ENSMUSG00000022312
ENSMUSG00000022313
ENSMUSG00000022323
ENSMUSG00000022325
ENSMUSG00000022332
ENSMUSG00000022336
ENSMUSG00000022370
ENSMUSG00000022386
ENSMUSG00000022390
ENSMUSG00000022468
ENSMUSG00000022471
ENSMUSG00000022516
ENSMUSG00000022538
ENSMUSG00000022557
ENSMUSG00000022635
ENSMUSG00000022672
ENSMUSG00000022685
ENSMUSG00000022696
ENSMUSG00000022704
ENSMUSG00000022706
ENSMUSG00000022718
ENSMUSG00000022721
ENSMUSG00000022748
ENSMUSG00000022774
ENSMUSG00000022779
ENSMUSG00000022792
ENSMUSG00000022800
ENSMUSG00000022858
ENSMUSG00000022884
ENSMUSG00000022889
ENSMUSG00000022961
ENSMUSG00000022983
ENSMUSG00000023007
ENSMUSG00000023025
ENSMUSG00000023051
ENSMUSG00000023087
ENSMUSG00000023106
ENSMUSG00000023118
ENSMUSG00000023156
ENSMUSG00000023495
ENSMUSG00000023723
ENSMUSG00000023938
ENSMUSG00000023939
ENSMUSG00000023952
ENSMUSG00000023967
ENSMUSG00000023971
ENSMUSG00000023988
ENSMUSG00000024019
ENSMUSG00000024037
ENSMUSG00000024045
ENSMUSG00000024079
ENSMUSG00000024081
ENSMUSG00000024095
ENSMUSG00000024097
ENSMUSG00000024120
ENSMUSG00000024135
ENSMUSG00000024181
ENSMUSG00000024188
ENSMUSG00000024217
ENSMUSG00000024234
ENSMUSG00000024246
ENSMUSG00000024258
ENSMUSG00000024266
ENSMUSG00000024268
ENSMUSG00000024287
ENSMUSG00000024312
ENSMUSG00000024360
ENSMUSG00000024369
ENSMUSG00000024404
ENSMUSG00000024414
ENSMUSG00000024422
ENSMUSG00000024429
ENSMUSG00000024436
ENSMUSG00000024446
ENSMUSG00000024472
ENSMUSG00000024491
ENSMUSG00000024493
ENSMUSG00000024498
ENSMUSG00000024515
ENSMUSG00000024528
ENSMUSG00000024563
ENSMUSG00000024587
ENSMUSG00000024604
ENSMUSG00000024608
ENSMUSG00000024613
ENSMUSG00000024683
ENSMUSG00000024732
ENSMUSG00000024735
ENSMUSG00000024785
ENSMUSG00000024800
ENSMUSG00000024829
ENSMUSG00000024831
ENSMUSG00000024841
ENSMUSG00000024853
ENSMUSG00000024902
ENSMUSG00000024925
ENSMUSG00000024949
ENSMUSG00000024975
ENSMUSG00000024991
ENSMUSG00000024999
ENSMUSG00000025024
ENSMUSG00000025047
ENSMUSG00000025056
ENSMUSG00000025081
ENSMUSG00000025086
ENSMUSG00000025133
ENSMUSG00000025155
ENSMUSG00000025184
ENSMUSG00000025200
ENSMUSG00000025208
ENSMUSG00000025262
ENSMUSG00000025264
ENSMUSG00000025266
ENSMUSG00000025290
ENSMUSG00000025337
ENSMUSG00000025362
ENSMUSG00000025364
ENSMUSG00000025395
ENSMUSG00000025404
ENSMUSG00000025451
ENSMUSG00000025464
ENSMUSG00000025571
ENSMUSG00000025576
ENSMUSG00000025580
ENSMUSG00000025586
ENSMUSG00000025762
ENSMUSG00000025785
ENSMUSG00000025794
ENSMUSG00000025869
ENSMUSG00000025872
ENSMUSG00000025880
ENSMUSG00000025898
ENSMUSG00000025899
ENSMUSG00000025920
ENSMUSG00000025962
ENSMUSG00000025967
ENSMUSG00000025977
ENSMUSG00000025982
ENSMUSG00000026019
ENSMUSG00000026020
ENSMUSG00000026034
ENSMUSG00000026035
ENSMUSG00000026058
ENSMUSG00000026083
ENSMUSG00000026087
ENSMUSG00000026087
ENSMUSG00000026127
ENSMUSG00000026159
ENSMUSG00000026174
ENSMUSG00000026196
ENSMUSG00000026234
ENSMUSG00000026245
ENSMUSG00000026248
ENSMUSG00000026254
ENSMUSG00000026273
ENSMUSG00000026305
ENSMUSG00000026349
ENSMUSG00000026356
ENSMUSG00000026374
ENSMUSG00000026377
ENSMUSG00000026404
ENSMUSG00000026427
ENSMUSG00000026492
ENSMUSG00000026496
ENSMUSG00000026511
ENSMUSG00000026615
ENSMUSG00000026618
ENSMUSG00000026634
ENSMUSG00000026667
ENSMUSG00000026707
ENSMUSG00000026709
ENSMUSG00000026723
ENSMUSG00000026806
ENSMUSG00000026843
ENSMUSG00000026887
ENSMUSG00000026889
ENSMUSG00000026896
ENSMUSG00000026915
ENSMUSG00000026917
ENSMUSG00000026970
ENSMUSG00000026987
ENSMUSG00000027079
ENSMUSG00000027086
ENSMUSG00000027091
ENSMUSG00000027133
ENSMUSG00000027170
ENSMUSG00000027176
ENSMUSG00000027184
ENSMUSG00000027185
ENSMUSG00000027193
ENSMUSG00000027201
ENSMUSG00000027233
ENSMUSG00000027236
ENSMUSG00000027288
ENSMUSG00000027304
ENSMUSG00000027324
ENSMUSG00000027349
ENSMUSG00000027374
ENSMUSG00000027387
ENSMUSG00000027404
ENSMUSG00000027405
ENSMUSG00000027422
ENSMUSG00000027433
ENSMUSG00000027487
ENSMUSG00000027498
ENSMUSG00000027509
ENSMUSG00000027510
ENSMUSG00000027580
ENSMUSG00000027582
ENSMUSG00000027593
ENSMUSG00000027613
ENSMUSG00000027620
ENSMUSG00000027628
ENSMUSG00000027639
ENSMUSG00000027655
ENSMUSG00000027663
ENSMUSG00000027680
ENSMUSG00000027714
ENSMUSG00000027719
ENSMUSG00000027752
ENSMUSG00000027763
ENSMUSG00000027770
ENSMUSG00000027774
ENSMUSG00000027787
ENSMUSG00000027796
ENSMUSG00000027810
ENSMUSG00000027881
ENSMUSG00000027905
ENSMUSG00000027933
ENSMUSG00000027951
ENSMUSG00000027981
ENSMUSG00000027998
ENSMUSG00000028010
ENSMUSG00000028016
ENSMUSG00000028029
ENSMUSG00000028034
ENSMUSG00000028053
ENSMUSG00000028069
ENSMUSG00000028081
ENSMUSG00000028085
ENSMUSG00000028107
ENSMUSG00000028114
ENSMUSG00000028134
ENSMUSG00000028137
ENSMUSG00000028140
ENSMUSG00000028156
ENSMUSG00000028180
ENSMUSG00000028187
ENSMUSG00000028199
ENSMUSG00000028233
ENSMUSG00000028234
ENSMUSG00000028274
ENSMUSG00000028292
ENSMUSG00000028318
ENSMUSG00000028322
ENSMUSG00000028330
ENSMUSG00000028382
ENSMUSG00000028405
ENSMUSG00000028411
ENSMUSG00000028423
ENSMUSG00000028430
ENSMUSG00000028433
ENSMUSG00000028484
ENSMUSG00000028495
ENSMUSG00000028546
ENSMUSG00000028580
ENSMUSG00000028609
ENSMUSG00000028622
ENSMUSG00000028639
ENSMUSG00000028651
ENSMUSG00000028653
ENSMUSG00000028675
ENSMUSG00000028676
ENSMUSG00000028683
ENSMUSG00000028688
ENSMUSG00000028691
ENSMUSG00000028706
ENSMUSG00000028729
ENSMUSG00000028741
ENSMUSG00000028760
ENSMUSG00000028772
ENSMUSG00000028790
ENSMUSG00000028798
ENSMUSG00000028809
ENSMUSG00000028811
ENSMUSG00000028820
ENSMUSG00000028821
ENSMUSG00000028842
ENSMUSG00000028861
ENSMUSG00000028869
ENSMUSG00000028882
ENSMUSG00000028889
ENSMUSG00000028898
ENSMUSG00000028902
ENSMUSG00000028907
ENSMUSG00000028911
ENSMUSG00000028936
ENSMUSG00000028948
ENSMUSG00000028959
ENSMUSG00000028964
ENSMUSG00000029028
ENSMUSG00000029034
ENSMUSG00000029038
ENSMUSG00000029066
ENSMUSG00000029097
ENSMUSG00000029141
ENSMUSG00000029145
ENSMUSG00000029167
ENSMUSG00000029169
ENSMUSG00000029173
ENSMUSG00000029206
ENSMUSG00000029208
ENSMUSG00000029227
ENSMUSG00000029250
ENSMUSG00000029290
ENSMUSG00000029313
ENSMUSG00000029328
ENSMUSG00000029345
ENSMUSG00000029388
ENSMUSG00000029389
ENSMUSG00000029402
ENSMUSG00000029404
ENSMUSG00000029405
ENSMUSG00000029423
ENSMUSG00000029427
ENSMUSG00000029430
ENSMUSG00000029439
ENSMUSG00000029480
ENSMUSG00000029486
ENSMUSG00000029504
ENSMUSG00000029507
ENSMUSG00000029536
ENSMUSG00000029538
ENSMUSG00000029547
ENSMUSG00000029557
ENSMUSG00000029594
ENSMUSG00000029599
ENSMUSG00000029610
ENSMUSG00000029613
ENSMUSG00000029614
ENSMUSG00000029624
ENSMUSG00000029625
ENSMUSG00000029647
ENSMUSG00000029687
ENSMUSG00000029701
ENSMUSG00000029715
ENSMUSG00000029726
ENSMUSG00000029777
ENSMUSG00000029814
ENSMUSG00000029817
ENSMUSG00000029823
ENSMUSG00000029826
ENSMUSG00000029918
ENSMUSG00000029922
ENSMUSG00000030002
ENSMUSG00000030016
ENSMUSG00000030037
ENSMUSG00000030045
ENSMUSG00000030056
ENSMUSG00000030057
ENSMUSG00000030079
ENSMUSG00000030138
ENSMUSG00000030188
ENSMUSG00000030189
ENSMUSG00000030204
ENSMUSG00000030224
ENSMUSG00000030264
ENSMUSG00000030309
ENSMUSG00000030335
ENSMUSG00000030411
ENSMUSG00000030423
ENSMUSG00000030432
ENSMUSG00000030435
ENSMUSG00000030491
ENSMUSG00000030512
ENSMUSG00000030515
ENSMUSG00000030521
ENSMUSG00000030590
ENSMUSG00000030609
ENSMUSG00000030611
ENSMUSG00000030612
ENSMUSG00000030619
ENSMUSG00000030655
ENSMUSG00000030662
ENSMUSG00000030678
ENSMUSG00000030681
ENSMUSG00000030706
ENSMUSG00000030738
ENSMUSG00000030738
ENSMUSG00000030744
ENSMUSG00000030751
ENSMUSG00000030779
ENSMUSG00000030795
ENSMUSG00000030801
ENSMUSG00000030846
ENSMUSG00000030866
ENSMUSG00000030871
ENSMUSG00000030879
ENSMUSG00000030888
ENSMUSG00000030924
ENSMUSG00000030929
ENSMUSG00000030942
ENSMUSG00000030960
ENSMUSG00000030966
ENSMUSG00000030986
ENSMUSG00000031060
ENSMUSG00000031107
ENSMUSG00000031109
ENSMUSG00000031134
ENSMUSG00000031148
ENSMUSG00000031157
ENSMUSG00000031167
ENSMUSG00000031171
ENSMUSG00000031189
ENSMUSG00000031256
ENSMUSG00000031311
ENSMUSG00000031320
ENSMUSG00000031330
ENSMUSG00000031358
ENSMUSG00000031393
ENSMUSG00000031403
ENSMUSG00000031410
ENSMUSG00000031433
ENSMUSG00000031527
ENSMUSG00000031533
ENSMUSG00000031578
ENSMUSG00000031586
ENSMUSG00000031590
ENSMUSG00000031601
ENSMUSG00000031639
ENSMUSG00000031652
ENSMUSG00000031668
ENSMUSG00000031681
ENSMUSG00000031683
ENSMUSG00000031691
ENSMUSG00000031723
ENSMUSG00000031754
ENSMUSG00000031792
ENSMUSG00000031816
ENSMUSG00000031826
ENSMUSG00000031843
ENSMUSG00000031848
ENSMUSG00000031864
ENSMUSG00000031901
ENSMUSG00000031917
ENSMUSG00000031948
ENSMUSG00000031949
ENSMUSG00000031960
ENSMUSG00000031976
ENSMUSG00000032026
ENSMUSG00000032040
ENSMUSG00000032042
ENSMUSG00000032044
ENSMUSG00000032077
ENSMUSG00000032097
ENSMUSG00000032101
ENSMUSG00000032103
ENSMUSG00000032178
ENSMUSG00000032212
ENSMUSG00000032215
ENSMUSG00000032239
ENSMUSG00000032265
ENSMUSG00000032288
ENSMUSG00000032293
ENSMUSG00000032297
ENSMUSG00000032316
ENSMUSG00000032342
ENSMUSG00000032387
ENSMUSG00000032396
ENSMUSG00000032399
ENSMUSG00000032402
ENSMUSG00000032407
ENSMUSG00000032410
ENSMUSG00000032423
ENSMUSG00000032459
ENSMUSG00000032469
ENSMUSG00000032480
ENSMUSG00000032497
ENSMUSG00000032518
ENSMUSG00000032563
ENSMUSG00000032566
ENSMUSG00000032580
ENSMUSG00000032582
ENSMUSG00000032604
ENSMUSG00000032621
ENSMUSG00000032637
ENSMUSG00000032661
ENSMUSG00000032690
ENSMUSG00000032834
ENSMUSG00000032940
ENSMUSG00000033020
ENSMUSG00000033036
ENSMUSG00000033047
ENSMUSG00000033099
ENSMUSG00000033166
ENSMUSG00000033216
ENSMUSG00000033222
ENSMUSG00000033228
ENSMUSG00000033285
ENSMUSG00000033294
ENSMUSG00000033356
ENSMUSG00000033365
ENSMUSG00000033423
ENSMUSG00000033439
ENSMUSG00000033499
ENSMUSG00000033565
ENSMUSG00000033581
ENSMUSG00000033644
ENSMUSG00000033658
ENSMUSG00000033712
ENSMUSG00000033732
ENSMUSG00000033760
ENSMUSG00000033845
ENSMUSG00000033871
ENSMUSG00000033882
ENSMUSG00000033931
ENSMUSG00000034022
ENSMUSG00000034088
ENSMUSG00000034120
ENSMUSG00000034163
ENSMUSG00000034192
ENSMUSG00000034194
ENSMUSG00000034211
ENSMUSG00000034259
ENSMUSG00000034274
ENSMUSG00000034278
ENSMUSG00000034321
ENSMUSG00000034442
ENSMUSG00000034459
ENSMUSG00000034544
ENSMUSG00000034575
ENSMUSG00000034610
ENSMUSG00000034621
ENSMUSG00000034640
ENSMUSG00000034653
ENSMUSG00000034667
ENSMUSG00000034681
ENSMUSG00000034724
ENSMUSG00000034729
ENSMUSG00000034732
ENSMUSG00000034818
ENSMUSG00000034820
ENSMUSG00000034839
ENSMUSG00000034880
ENSMUSG00000034889
ENSMUSG00000034892
ENSMUSG00000034908
ENSMUSG00000034931
ENSMUSG00000034932
ENSMUSG00000034949
ENSMUSG00000034994
ENSMUSG00000035045
ENSMUSG00000035049
ENSMUSG00000035051
ENSMUSG00000035064
ENSMUSG00000035093
ENSMUSG00000035125
ENSMUSG00000035139
ENSMUSG00000035161
ENSMUSG00000035164
ENSMUSG00000035202
ENSMUSG00000035215
ENSMUSG00000035248
ENSMUSG00000035275
ENSMUSG00000035370
ENSMUSG00000035378
ENSMUSG00000035517
ENSMUSG00000035530
ENSMUSG00000035575
ENSMUSG00000035585
ENSMUSG00000035597
ENSMUSG00000035601
ENSMUSG00000035632
ENSMUSG00000035649
ENSMUSG00000035772
ENSMUSG00000035851
ENSMUSG00000035896
ENSMUSG00000035960
ENSMUSG00000035967
ENSMUSG00000036054
ENSMUSG00000036109
ENSMUSG00000036114
ENSMUSG00000036160
ENSMUSG00000036249
ENSMUSG00000036270
ENSMUSG00000036285
ENSMUSG00000036323
ENSMUSG00000036371
ENSMUSG00000036376
ENSMUSG00000036537
ENSMUSG00000036550
ENSMUSG00000036572
ENSMUSG00000036693
ENSMUSG00000036698
ENSMUSG00000036733
ENSMUSG00000036779
ENSMUSG00000036781
ENSMUSG00000036850
ENSMUSG00000036860
ENSMUSG00000036867
ENSMUSG00000036912
ENSMUSG00000036941
ENSMUSG00000036983
ENSMUSG00000036992
ENSMUSG00000037053
ENSMUSG00000037058
ENSMUSG00000037070
ENSMUSG00000037085
ENSMUSG00000037111
ENSMUSG00000037138
ENSMUSG00000037149
ENSMUSG00000037197
ENSMUSG00000037253
ENSMUSG00000037262
ENSMUSG00000037275
ENSMUSG00000037296
ENSMUSG00000037331
ENSMUSG00000037361
ENSMUSG00000037364
ENSMUSG00000037376
ENSMUSG00000037461
ENSMUSG00000037525
ENSMUSG00000037531
ENSMUSG00000037563
ENSMUSG00000037608
ENSMUSG00000037740
ENSMUSG00000037742
ENSMUSG00000037772
ENSMUSG00000037784
ENSMUSG00000037805
ENSMUSG00000037845
ENSMUSG00000037851
ENSMUSG00000037857
ENSMUSG00000037921
ENSMUSG00000037958
ENSMUSG00000037965
ENSMUSG00000037993
ENSMUSG00000038014
ENSMUSG00000038046
ENSMUSG00000038132
ENSMUSG00000038274
ENSMUSG00000038279
ENSMUSG00000038290
ENSMUSG00000038299
ENSMUSG00000038305
ENSMUSG00000038335
ENSMUSG00000038374
ENSMUSG00000038384
ENSMUSG00000038398
ENSMUSG00000038406
ENSMUSG00000038446
ENSMUSG00000038489
ENSMUSG00000038500
ENSMUSG00000038507
ENSMUSG00000038510
ENSMUSG00000038563
ENSMUSG00000038611
ENSMUSG00000038646
ENSMUSG00000038650
ENSMUSG00000038762
ENSMUSG00000038784
ENSMUSG00000038812
ENSMUSG00000038838
ENSMUSG00000038848
ENSMUSG00000038866
ENSMUSG00000038880
ENSMUSG00000038888
ENSMUSG00000038900
ENSMUSG00000038957
ENSMUSG00000039001
ENSMUSG00000039108
ENSMUSG00000039130
ENSMUSG00000039148
ENSMUSG00000039209
ENSMUSG00000039218
ENSMUSG00000039220
ENSMUSG00000039221
ENSMUSG00000039236
ENSMUSG00000039356
ENSMUSG00000039449
ENSMUSG00000039501
ENSMUSG00000039536
ENSMUSG00000039607
ENSMUSG00000039630
ENSMUSG00000039640
ENSMUSG00000039652
ENSMUSG00000039660
ENSMUSG00000039680
ENSMUSG00000039717
ENSMUSG00000039748
ENSMUSG00000039756
ENSMUSG00000039771
ENSMUSG00000039782
ENSMUSG00000039810
ENSMUSG00000039826
ENSMUSG00000039850
ENSMUSG00000039860
ENSMUSG00000039929
ENSMUSG00000039981
ENSMUSG00000040025
ENSMUSG00000040028
ENSMUSG00000040029
ENSMUSG00000040043
ENSMUSG00000040054
ENSMUSG00000040112
ENSMUSG00000040140
ENSMUSG00000040269
ENSMUSG00000040296
ENSMUSG00000040302
ENSMUSG00000040354
ENSMUSG00000040356
ENSMUSG00000040383
ENSMUSG00000040423
ENSMUSG00000040464
ENSMUSG00000040482
ENSMUSG00000040521
ENSMUSG00000040522
ENSMUSG00000040594
ENSMUSG00000040613
ENSMUSG00000040620
ENSMUSG00000040621
ENSMUSG00000040629
ENSMUSG00000040688
ENSMUSG00000040694
ENSMUSG00000040725
ENSMUSG00000040728
ENSMUSG00000040731
ENSMUSG00000040738
ENSMUSG00000040761
ENSMUSG00000040767
ENSMUSG00000040824
ENSMUSG00000040904
ENSMUSG00000040952
ENSMUSG00000041057
ENSMUSG00000041130
ENSMUSG00000041168
ENSMUSG00000041199
ENSMUSG00000041319
ENSMUSG00000041328
ENSMUSG00000041346
ENSMUSG00000041360
ENSMUSG00000041415
ENSMUSG00000041453
ENSMUSG00000041459
ENSMUSG00000041477
ENSMUSG00000041506
ENSMUSG00000041530
ENSMUSG00000041560
ENSMUSG00000041632
ENSMUSG00000041645
ENSMUSG00000041747
ENSMUSG00000041781
ENSMUSG00000041815
ENSMUSG00000041827
ENSMUSG00000041837
ENSMUSG00000041841
ENSMUSG00000041879
ENSMUSG00000041912
ENSMUSG00000042079
ENSMUSG00000042097
ENSMUSG00000042109
ENSMUSG00000042156
ENSMUSG00000042167
ENSMUSG00000042271
ENSMUSG00000042275
ENSMUSG00000042308
ENSMUSG00000042354
ENSMUSG00000042369
ENSMUSG00000042389
ENSMUSG00000042396
ENSMUSG00000042426
ENSMUSG00000042433
ENSMUSG00000042500
ENSMUSG00000042502
ENSMUSG00000042520
ENSMUSG00000042535
ENSMUSG00000042590
ENSMUSG00000042605
ENSMUSG00000042625
ENSMUSG00000042650
ENSMUSG00000042677
ENSMUSG00000042694
ENSMUSG00000042699
ENSMUSG00000042772
ENSMUSG00000042787
ENSMUSG00000042851
ENSMUSG00000043241
ENSMUSG00000043279
ENSMUSG00000043372
ENSMUSG00000043432
ENSMUSG00000043535
ENSMUSG00000043572
ENSMUSG00000043639
ENSMUSG00000043648
ENSMUSG00000043702
ENSMUSG00000043716
ENSMUSG00000043962
ENSMUSG00000043991
ENSMUSG00000044018
ENSMUSG00000044068
ENSMUSG00000044068
ENSMUSG00000044149
ENSMUSG00000044150
ENSMUSG00000044155
ENSMUSG00000044221
ENSMUSG00000044224
ENSMUSG00000044475
ENSMUSG00000044533
ENSMUSG00000044583
ENSMUSG00000044595
ENSMUSG00000044709
ENSMUSG00000044763
ENSMUSG00000044786
ENSMUSG00000044847
ENSMUSG00000044986
ENSMUSG00000045128
ENSMUSG00000045193
ENSMUSG00000045427
ENSMUSG00000045538
ENSMUSG00000045624
ENSMUSG00000045662
ENSMUSG00000045817
ENSMUSG00000045896
ENSMUSG00000045932
ENSMUSG00000045948
ENSMUSG00000045983
ENSMUSG00000045996
ENSMUSG00000046139
ENSMUSG00000046201
ENSMUSG00000046330
ENSMUSG00000046364
ENSMUSG00000046434
ENSMUSG00000046441
ENSMUSG00000046667
ENSMUSG00000046756
ENSMUSG00000046865
ENSMUSG00000046876
ENSMUSG00000046909
ENSMUSG00000046994
ENSMUSG00000047153
ENSMUSG00000047213
ENSMUSG00000047371
ENSMUSG00000047417
ENSMUSG00000047423
ENSMUSG00000047583
ENSMUSG00000047635
ENSMUSG00000047649
ENSMUSG00000047656
ENSMUSG00000047675
ENSMUSG00000047686
ENSMUSG00000047749
ENSMUSG00000047888
ENSMUSG00000047911
ENSMUSG00000048012
ENSMUSG00000048039
ENSMUSG00000048109
ENSMUSG00000048271
ENSMUSG00000048439
ENSMUSG00000048495
ENSMUSG00000048696
ENSMUSG00000048758
ENSMUSG00000048878
ENSMUSG00000049184
ENSMUSG00000049396
ENSMUSG00000049470
ENSMUSG00000049482
ENSMUSG00000049517
ENSMUSG00000049950
ENSMUSG00000049960
ENSMUSG00000050188
ENSMUSG00000050192
ENSMUSG00000050213
ENSMUSG00000050244
ENSMUSG00000050312
ENSMUSG00000050966
ENSMUSG00000051062
ENSMUSG00000051169
ENSMUSG00000051223
ENSMUSG00000051518
ENSMUSG00000051550
ENSMUSG00000051557
ENSMUSG00000051695
ENSMUSG00000051730
ENSMUSG00000051934
ENSMUSG00000051965
ENSMUSG00000052146
ENSMUSG00000052253
ENSMUSG00000052293
ENSMUSG00000052382
ENSMUSG00000052406
ENSMUSG00000052488
ENSMUSG00000052551
ENSMUSG00000052595
ENSMUSG00000052707
ENSMUSG00000052748
ENSMUSG00000052751
ENSMUSG00000052926
ENSMUSG00000052928
ENSMUSG00000052962
ENSMUSG00000053286
ENSMUSG00000053289
ENSMUSG00000053333
ENSMUSG00000053453
ENSMUSG00000053536
ENSMUSG00000053565
ENSMUSG00000053746
ENSMUSG00000053801
ENSMUSG00000054003
ENSMUSG00000054079
ENSMUSG00000054256
ENSMUSG00000054309
ENSMUSG00000054312
ENSMUSG00000054509
ENSMUSG00000054582
ENSMUSG00000054679
ENSMUSG00000055065
ENSMUSG00000055204
ENSMUSG00000055334
ENSMUSG00000055436
ENSMUSG00000055491
ENSMUSG00000055531
ENSMUSG00000055538
ENSMUSG00000055547
ENSMUSG00000055760
ENSMUSG00000055762
ENSMUSG00000055932
ENSMUSG00000056076
ENSMUSG00000056155
ENSMUSG00000056167
ENSMUSG00000056209
ENSMUSG00000056211
ENSMUSG00000056228
ENSMUSG00000056305
ENSMUSG00000056310
ENSMUSG00000056820
ENSMUSG00000056851
ENSMUSG00000057000
ENSMUSG00000057113
ENSMUSG00000057130
ENSMUSG00000057278
ENSMUSG00000057322
ENSMUSG00000057388
ENSMUSG00000057421
ENSMUSG00000057541
ENSMUSG00000057706
ENSMUSG00000057788
ENSMUSG00000057841
ENSMUSG00000057863
ENSMUSG00000058267
ENSMUSG00000058301
ENSMUSG00000058355
ENSMUSG00000058392
ENSMUSG00000058546
ENSMUSG00000058558
ENSMUSG00000058600
ENSMUSG00000058655
ENSMUSG00000059005
ENSMUSG00000059070
ENSMUSG00000059183
ENSMUSG00000059208
ENSMUSG00000059273
ENSMUSG00000059278
ENSMUSG00000059291
ENSMUSG00000059648
ENSMUSG00000059796
ENSMUSG00000060036
ENSMUSG00000060121
ENSMUSG00000060152
ENSMUSG00000060373
ENSMUSG00000060373
ENSMUSG00000060499
ENSMUSG00000060615
ENSMUSG00000060636
ENSMUSG00000060657
ENSMUSG00000060679
ENSMUSG00000060739
ENSMUSG00000060938
ENSMUSG00000060950
ENSMUSG00000060985
ENSMUSG00000061024
ENSMUSG00000061028
ENSMUSG00000061032
ENSMUSG00000061104
ENSMUSG00000061136
ENSMUSG00000061286
ENSMUSG00000061360
ENSMUSG00000061410
ENSMUSG00000061458
ENSMUSG00000061474
ENSMUSG00000061477
ENSMUSG00000061479
ENSMUSG00000061559
ENSMUSG00000061613
ENSMUSG00000061787
ENSMUSG00000061787
ENSMUSG00000061983
ENSMUSG00000062006
ENSMUSG00000062078
ENSMUSG00000062203
ENSMUSG00000062309
ENSMUSG00000062328
ENSMUSG00000062488
ENSMUSG00000062604
ENSMUSG00000062647
ENSMUSG00000062981
ENSMUSG00000062997
ENSMUSG00000063179
ENSMUSG00000063200
ENSMUSG00000063316
ENSMUSG00000063334
ENSMUSG00000063457
ENSMUSG00000063480
ENSMUSG00000063511
ENSMUSG00000063646
ENSMUSG00000063785
ENSMUSG00000063785
ENSMUSG00000063800
ENSMUSG00000063804
ENSMUSG00000063808
ENSMUSG00000063884
ENSMUSG00000063888
ENSMUSG00000063919
ENSMUSG00000064030
ENSMUSG00000064061
ENSMUSG00000066037
ENSMUSG00000066107
ENSMUSG00000066148
ENSMUSG00000066232
ENSMUSG00000066568
ENSMUSG00000066800
ENSMUSG00000067150
ENSMUSG00000067194
ENSMUSG00000067274
ENSMUSG00000067288
ENSMUSG00000067297
ENSMUSG00000067369
ENSMUSG00000067750
ENSMUSG00000067750
ENSMUSG00000067873
ENSMUSG00000068392
ENSMUSG00000068407
ENSMUSG00000068739
ENSMUSG00000068823
ENSMUSG00000068856
ENSMUSG00000068882
ENSMUSG00000068917
ENSMUSG00000068921
ENSMUSG00000069020
ENSMUSG00000069045
ENSMUSG00000069049
ENSMUSG00000069049
ENSMUSG00000069565
ENSMUSG00000069769
ENSMUSG00000069867
ENSMUSG00000069895
ENSMUSG00000070291
ENSMUSG00000070319
ENSMUSG00000070527
ENSMUSG00000070544
ENSMUSG00000070697
ENSMUSG00000070699
ENSMUSG00000070699
ENSMUSG00000070732
ENSMUSG00000070780
ENSMUSG00000071054
ENSMUSG00000071072
ENSMUSG00000071172
ENSMUSG00000071337
ENSMUSG00000071415
ENSMUSG00000071644
ENSMUSG00000071645
ENSMUSG00000071652
ENSMUSG00000071662
ENSMUSG00000071686
ENSMUSG00000071723
ENSMUSG00000072437
ENSMUSG00000072582
ENSMUSG00000072596
ENSMUSG00000072596
ENSMUSG00000073460
ENSMUSG00000073702
ENSMUSG00000073838
ENSMUSG00000073894
ENSMUSG00000073894
ENSMUSG00000074088
ENSMUSG00000074102
ENSMUSG00000074129
ENSMUSG00000074182
ENSMUSG00000074480
ENSMUSG00000074656
ENSMUSG00000074682
ENSMUSG00000074817
ENSMUSG00000074890
ENSMUSG00000074895
ENSMUSG00000074909
ENSMUSG00000075376
ENSMUSG00000075592
ENSMUSG00000075600
ENSMUSG00000078348
ENSMUSG00000078427
ENSMUSG00000078676
ENSMUSG00000078765
ENSMUSG00000078812
ENSMUSG00000078812
ENSMUSG00000079036
ENSMUSG00000079043
ENSMUSG00000079108
ENSMUSG00000079259
ENSMUSG00000079387
ENSMUSG00000079435
ENSMUSG00000079480
ENSMUSG00000079641
ENSMUSG00000081607
ENSMUSG00000081906
ENSMUSG00000082079
ENSMUSG00000084128
ENSMUSG00000084842
ENSMUSG00000085492
ENSMUSG00000086524
ENSMUSG00000087166
ENSMUSG00000089824
ENSMUSG00000090137
ENSMUSG00000090290
ENSMUSG00000090553
ENSMUSG00000090733
ENSMUSG00000090862
ENSMUSG00000090919
ENSMUSG00000091625
ENSMUSG00000092035
ENSMUSG00000092232
ENSMUSG00000093661
ENSMUSG00000093674
ENSMUSG00000093987
ENSMUSG00000093987
ENSMUSG00000093987
ENSMUSG00000093987
ENSMUSG00000093987
ENSMUSG00000093987
ENSMUSG00000094483
ENSMUSG00000094724
ENSMUSG00000095567
ENSMUSG00000095824
ENSMUSG00000096199
ENSMUSG00000096370
ENSMUSG00000096619
ENSMUSG00000097239
ENSMUSG00000097239
ENSMUSG00000097392
ENSMUSG00000098134
ENSMUSG00000098274
ENSMUSG00000102252
ENSMUSG00000104043
ENSMUSG00000106918
ENSMUSG00000109336
ENSMUSG00000109941
ENSMUSG00000112856
ENSMUSG00000112919
ENSMUSG00000116275
ENSMUSG00000116564
ENSMUSG00000117694
ENSMUSG00000117942
ENSMUSG00000118124
ENSMUSG00000118552
