# Supplementary material for: CRISPR Screen Identifies the RNA-Binding Protein Eef1a1 as a Key Regulator of Myogenesis
Source: Int J Mol Sci. 2024 Apr 28;25(9):4816. doi: 10.3390/ijms25094816 (PMC11084334; doi:10.3390/ijms25094816)
Supplement: Supplementary file 1 [file ijms-25-04816-s001.zip › Supplemental Table S3. mouse-RBP-CRISPR-oligo pool.probe.xls]

## Sheet: sgRNA
探针ID	序列 Sequence	长度 Length
RBP_lib_1	ACCGGCCAACATACCtatcttgtggaaaggacgaaacaccggTTGATATTGGACGCCAAGATGTTTAAGAGCTATGCTGGAAACAGCATAGCACTCGTTCCTTTCGA	107
RBP_lib_2	ACCGGCCAACATACCtatcttgtggaaaggacgaaacaccggCATCAGAAGAAGCCTCCCTCGTTTAAGAGCTATGCTGGAAACAGCATAGCACTCGTTCCTTTCGA	107
RBP_lib_3	ACCGGCCAACATACCtatcttgtggaaaggacgaaacaccggAGAAGCCTCCCTCAGGGCGTGTTTAAGAGCTATGCTGGAAACAGCATAGCACTCGTTCCTTTCGA	107
RBP_lib_4	ACCGGCCAACATACCtatcttgtggaaaggacgaaacaccggCATGGAAAAATTCCGTCATCGTTTAAGAGCTATGCTGGAAACAGCATAGCACTCGTTCCTTTCGA	107
RBP_lib_5	ACCGGCCAACATACCtatcttgtggaaaggacgaaacaccggGCTTTCCAACGCCCTGAGGGGTTTAAGAGCTATGCTGGAAACAGCATAGCACTCGTTCCTTTCGA	107
RBP_lib_6	ACCGGCCAACATACCtatcttgtggaaaggacgaaacaccggTGTAATGATGTACAGCTTAAGTTTAAGAGCTATGCTGGAAACAGCATAGCACTCGTTCCTTTCGA	107
RBP_lib_7	ACCGGCCAACATACCtatcttgtggaaaggacgaaacaccggGCCACGCTGAGGTCCTCACGGTTTAAGAGCTATGCTGGAAACAGCATAGCACTCGTTCCTTTCGA	107
RBP_lib_8	ACCGGCCAACATACCtatcttgtggaaaggacgaaacaccggGGTAGAACATGGGCCAATCTGTTTAAGAGCTATGCTGGAAACAGCATAGCACTCGTTCCTTTCGA	107
RBP_lib_9	ACCGGCCAACATACCtatcttgtggaaaggacgaaacaccggGCGGATCTTCTGCACGCGCAGTTTAAGAGCTATGCTGGAAACAGCATAGCACTCGTTCCTTTCGA	107
RBP_lib_10	ACCGGCCAACATACCtatcttgtggaaaggacgaaacaccggCGCGTGCAGAAGATCCGCGCGTTTAAGAGCTATGCTGGAAACAGCATAGCACTCGTTCCTTTCGA	107
RBP_lib_11	ACCGGCCAACATACCtatcttgtggaaaggacgaaacaccggCGGATCTTCTGCACGCGCAAGTTTAAGAGCTATGCTGGAAACAGCATAGCACTCGTTCCTTTCGA	107
RBP_lib_12	ACCGGCCAACATACCtatcttgtggaaaggacgaaacaccggGCGCGTGCAGAAGATCCGCGGTTTAAGAGCTATGCTGGAAACAGCATAGCACTCGTTCCTTTCGA	107
RBP_lib_13	ACCGGCCAACATACCtatcttgtggaaaggacgaaacaccggGCACGCGCAAGGGTAGGCCCGTTTAAGAGCTATGCTGGAAACAGCATAGCACTCGTTCCTTTCGA	107
RBP_lib_14	ACCGGCCAACATACCtatcttgtggaaaggacgaaacaccggGTGGACGGTGGGATCATGGAGTTTAAGAGCTATGCTGGAAACAGCATAGCACTCGTTCCTTTCGA	107
RBP_lib_15	ACCGGCCAACATACCtatcttgtggaaaggacgaaacaccggTGGACGGTGGGATCATGGAAGTTTAAGAGCTATGCTGGAAACAGCATAGCACTCGTTCCTTTCGA	107
RBP_lib_16	ACCGGCCAACATACCtatcttgtggaaaggacgaaacaccggTCTTCTGCACGCGCAAGGGTGTTTAAGAGCTATGCTGGAAACAGCATAGCACTCGTTCCTTTCGA	107
RBP_lib_17	ACCGGCCAACATACCtatcttgtggaaaggacgaaacaccggATGCATGGCGTATGTCGCGAGTTTAAGAGCTATGCTGGAAACAGCATAGCACTCGTTCCTTTCGA	107
RBP_lib_18	ACCGGCCAACATACCtatcttgtggaaaggacgaaacaccggATTCGAATGAACCTGGAAAAGTTTAAGAGCTATGCTGGAAACAGCATAGCACTCGTTCCTTTCGA	107
RBP_lib_19	ACCGGCCAACATACCtatcttgtggaaaggacgaaacaccggAAAACGGGAGAAGAAGACGCGTTTAAGAGCTATGCTGGAAACAGCATAGCACTCGTTCCTTTCGA	107
RBP_lib_20	ACCGGCCAACATACCtatcttgtggaaaggacgaaacaccggATACCTGCAGGTGACCTGCTGTTTAAGAGCTATGCTGGAAACAGCATAGCACTCGTTCCTTTCGA	107
RBP_lib_21	ACCGGCCAACATACCtatcttgtggaaaggacgaaacaccggGGATTATTCACTTTGCTTGGGTTTAAGAGCTATGCTGGAAACAGCATAGCACTCGTTCCTTTCGA	107
RBP_lib_22	ACCGGCCAACATACCtatcttgtggaaaggacgaaacaccggATGTGGCAATGTCAGGAGAAGTTTAAGAGCTATGCTGGAAACAGCATAGCACTCGTTCCTTTCGA	107
RBP_lib_23	ACCGGCCAACATACCtatcttgtggaaaggacgaaacaccggCAGCCAGACCAGTGAGATTGGTTTAAGAGCTATGCTGGAAACAGCATAGCACTCGTTCCTTTCGA	107
RBP_lib_24	ACCGGCCAACATACCtatcttgtggaaaggacgaaacaccggTCGCCAAGTCATGTGAGAACGTTTAAGAGCTATGCTGGAAACAGCATAGCACTCGTTCCTTTCGA	107
RBP_lib_25	ACCGGCCAACATACCtatcttgtggaaaggacgaaacaccggCGGAAGTTAACGGCGTCTATGTTTAAGAGCTATGCTGGAAACAGCATAGCACTCGTTCCTTTCGA	107
RBP_lib_26	ACCGGCCAACATACCtatcttgtggaaaggacgaaacaccggCTATAGACGCCGTTAACTTCGTTTAAGAGCTATGCTGGAAACAGCATAGCACTCGTTCCTTTCGA	107
RBP_lib_27	ACCGGCCAACATACCtatcttgtggaaaggacgaaacaccggTTAACTTCCGGGACGTTCCGGTTTAAGAGCTATGCTGGAAACAGCATAGCACTCGTTCCTTTCGA	107
RBP_lib_28	ACCGGCCAACATACCtatcttgtggaaaggacgaaacaccggCGGAACGTCCCGGAAGTTAAGTTTAAGAGCTATGCTGGAAACAGCATAGCACTCGTTCCTTTCGA	107
RBP_lib_29	ACCGGCCAACATACCtatcttgtggaaaggacgaaacaccggGTTAACGGCGTCTATAGGCAGTTTAAGAGCTATGCTGGAAACAGCATAGCACTCGTTCCTTTCGA	107
RBP_lib_30	ACCGGCCAACATACCtatcttgtggaaaggacgaaacaccggTATAGACGCCGTTAACTTCCGTTTAAGAGCTATGCTGGAAACAGCATAGCACTCGTTCCTTTCGA	107
RBP_lib_31	ACCGGCCAACATACCtatcttgtggaaaggacgaaacaccggTTAACGGCGTCTATAGGCATGTTTAAGAGCTATGCTGGAAACAGCATAGCACTCGTTCCTTTCGA	107
RBP_lib_32	ACCGGCCAACATACCtatcttgtggaaaggacgaaacaccggTAACGGCGTCTATAGGCATGGTTTAAGAGCTATGCTGGAAACAGCATAGCACTCGTTCCTTTCGA	107
RBP_lib_33	ACCGGCCAACATACCtatcttgtggaaaggacgaaacaccggGGCCGCGGAGTTGAGGCTGCGTTTAAGAGCTATGCTGGAAACAGCATAGCACTCGTTCCTTTCGA	107
RBP_lib_34	ACCGGCCAACATACCtatcttgtggaaaggacgaaacaccggCTCCAGCAGCCTCAACTCCGGTTTAAGAGCTATGCTGGAAACAGCATAGCACTCGTTCCTTTCGA	107
RBP_lib_35	ACCGGCCAACATACCtatcttgtggaaaggacgaaacaccggAAACAATGGCCCGAGTCTAAGTTTAAGAGCTATGCTGGAAACAGCATAGCACTCGTTCCTTTCGA	107
RBP_lib_36	ACCGGCCAACATACCtatcttgtggaaaggacgaaacaccggCGCCACCCATCTAGTCAAGCGTTTAAGAGCTATGCTGGAAACAGCATAGCACTCGTTCCTTTCGA	107
RBP_lib_37	ACCGGCCAACATACCtatcttgtggaaaggacgaaacaccggCCATTGTTTGTCTGTAGAACGTTTAAGAGCTATGCTGGAAACAGCATAGCACTCGTTCCTTTCGA	107
RBP_lib_38	ACCGGCCAACATACCtatcttgtggaaaggacgaaacaccggTACTGGCCTGCTTGACTAGAGTTTAAGAGCTATGCTGGAAACAGCATAGCACTCGTTCCTTTCGA	107
RBP_lib_39	ACCGGCCAACATACCtatcttgtggaaaggacgaaacaccggTGGCGGCGGCCGCGGAGTTGGTTTAAGAGCTATGCTGGAAACAGCATAGCACTCGTTCCTTTCGA	107
RBP_lib_40	ACCGGCCAACATACCtatcttgtggaaaggacgaaacaccggGGGAATAAGTACAGTGCTCAGTTTAAGAGCTATGCTGGAAACAGCATAGCACTCGTTCCTTTCGA	107
RBP_lib_41	ACCGGCCAACATACCtatcttgtggaaaggacgaaacaccggACGCGACGTTTCTTGGACAGGTTTAAGAGCTATGCTGGAAACAGCATAGCACTCGTTCCTTTCGA	107
RBP_lib_42	ACCGGCCAACATACCtatcttgtggaaaggacgaaacaccggCCCGGACACGCGACGTTTCTGTTTAAGAGCTATGCTGGAAACAGCATAGCACTCGTTCCTTTCGA	107
RBP_lib_43	ACCGGCCAACATACCtatcttgtggaaaggacgaaacaccggTCCAAGAAACGTCGCGTGTCGTTTAAGAGCTATGCTGGAAACAGCATAGCACTCGTTCCTTTCGA	107
RBP_lib_44	ACCGGCCAACATACCtatcttgtggaaaggacgaaacaccggTTTCTTGGACAGCGGCGAGCGTTTAAGAGCTATGCTGGAAACAGCATAGCACTCGTTCCTTTCGA	107
RBP_lib_45	ACCGGCCAACATACCtatcttgtggaaaggacgaaacaccggCCAAGAAACGTCGCGTGTCCGTTTAAGAGCTATGCTGGAAACAGCATAGCACTCGTTCCTTTCGA	107
RBP_lib_46	ACCGGCCAACATACCtatcttgtggaaaggacgaaacaccggTCCGGGCCTGATCCAAAGCCGTTTAAGAGCTATGCTGGAAACAGCATAGCACTCGTTCCTTTCGA	107
RBP_lib_47	ACCGGCCAACATACCtatcttgtggaaaggacgaaacaccggTCGGACAGCGCAGACTGTGCGTTTAAGAGCTATGCTGGAAACAGCATAGCACTCGTTCCTTTCGA	107
RBP_lib_48	ACCGGCCAACATACCtatcttgtggaaaggacgaaacaccggTTAGAACCCGGCTTTGGATCGTTTAAGAGCTATGCTGGAAACAGCATAGCACTCGTTCCTTTCGA	107
RBP_lib_49	ACCGGCCAACATACCtatcttgtggaaaggacgaaacaccggCCCGTTGGCGGGACAACCGTGTTTAAGAGCTATGCTGGAAACAGCATAGCACTCGTTCCTTTCGA	107
RBP_lib_50	ACCGGCCAACATACCtatcttgtggaaaggacgaaacaccggGCCAACGGTTGTCCCGCCAAGTTTAAGAGCTATGCTGGAAACAGCATAGCACTCGTTCCTTTCGA	107
RBP_lib_51	ACCGGCCAACATACCtatcttgtggaaaggacgaaacaccggCGCTCCCGGACCATGTCCGCGTTTAAGAGCTATGCTGGAAACAGCATAGCACTCGTTCCTTTCGA	107
RBP_lib_52	ACCGGCCAACATACCtatcttgtggaaaggacgaaacaccggCCAACGGTTGTCCCGCCAACGTTTAAGAGCTATGCTGGAAACAGCATAGCACTCGTTCCTTTCGA	107
RBP_lib_53	ACCGGCCAACATACCtatcttgtggaaaggacgaaacaccggGGTTGGCCGGCTCCCGTTGGGTTTAAGAGCTATGCTGGAAACAGCATAGCACTCGTTCCTTTCGA	107
RBP_lib_54	ACCGGCCAACATACCtatcttgtggaaaggacgaaacaccggCCAACGGGAGCCGGCCAACCGTTTAAGAGCTATGCTGGAAACAGCATAGCACTCGTTCCTTTCGA	107
RBP_lib_55	ACCGGCCAACATACCtatcttgtggaaaggacgaaacaccggCGGGCTGGAGCTGTTCGCGCGTTTAAGAGCTATGCTGGAAACAGCATAGCACTCGTTCCTTTCGA	107
RBP_lib_56	ACCGGCCAACATACCtatcttgtggaaaggacgaaacaccggGTTGGCCGGCTCCCGTTGGCGTTTAAGAGCTATGCTGGAAACAGCATAGCACTCGTTCCTTTCGA	107
RBP_lib_57	ACCGGCCAACATACCtatcttgtggaaaggacgaaacaccggGTCGCGACCTACGTTGATCCGTTTAAGAGCTATGCTGGAAACAGCATAGCACTCGTTCCTTTCGA	107
RBP_lib_58	ACCGGCCAACATACCtatcttgtggaaaggacgaaacaccggAGGTCGCGACCAGCCCAAATGTTTAAGAGCTATGCTGGAAACAGCATAGCACTCGTTCCTTTCGA	107
RBP_lib_59	ACCGGCCAACATACCtatcttgtggaaaggacgaaacaccggAGGCTGTCACCGATTTGGGCGTTTAAGAGCTATGCTGGAAACAGCATAGCACTCGTTCCTTTCGA	107
RBP_lib_60	ACCGGCCAACATACCtatcttgtggaaaggacgaaacaccggACCTACGTTGATCCAGGAAAGTTTAAGAGCTATGCTGGAAACAGCATAGCACTCGTTCCTTTCGA	107
RBP_lib_61	ACCGGCCAACATACCtatcttgtggaaaggacgaaacaccggTCAGTCGCTTCTCCACAAGAGTTTAAGAGCTATGCTGGAAACAGCATAGCACTCGTTCCTTTCGA	107
RBP_lib_62	ACCGGCCAACATACCtatcttgtggaaaggacgaaacaccggAAAGGCCATTCCTCTGGCGCGTTTAAGAGCTATGCTGGAAACAGCATAGCACTCGTTCCTTTCGA	107
RBP_lib_63	ACCGGCCAACATACCtatcttgtggaaaggacgaaacaccggCATCGGAATAGCATAAGCTGGTTTAAGAGCTATGCTGGAAACAGCATAGCACTCGTTCCTTTCGA	107
RBP_lib_64	ACCGGCCAACATACCtatcttgtggaaaggacgaaacaccggGTTCAAAACCCAGCGCTTCTGTTTAAGAGCTATGCTGGAAACAGCATAGCACTCGTTCCTTTCGA	107
RBP_lib_65	ACCGGCCAACATACCtatcttgtggaaaggacgaaacaccggCCGAGCCGTAAATGGCCTCCGTTTAAGAGCTATGCTGGAAACAGCATAGCACTCGTTCCTTTCGA	107
RBP_lib_66	ACCGGCCAACATACCtatcttgtggaaaggacgaaacaccggCGAGCCGTAAATGGCCTCCAGTTTAAGAGCTATGCTGGAAACAGCATAGCACTCGTTCCTTTCGA	107
RBP_lib_67	ACCGGCCAACATACCtatcttgtggaaaggacgaaacaccggGATCTGCGGCCGGATGCGCGGTTTAAGAGCTATGCTGGAAACAGCATAGCACTCGTTCCTTTCGA	107
RBP_lib_68	ACCGGCCAACATACCtatcttgtggaaaggacgaaacaccggCATTTACGGCTCGGACTTCCGTTTAAGAGCTATGCTGGAAACAGCATAGCACTCGTTCCTTTCGA	107
RBP_lib_69	ACCGGCCAACATACCtatcttgtggaaaggacgaaacaccggCTCAGCCCGGCCGCGTCCAGGTTTAAGAGCTATGCTGGAAACAGCATAGCACTCGTTCCTTTCGA	107
RBP_lib_70	ACCGGCCAACATACCtatcttgtggaaaggacgaaacaccggGGAGAGCTATTCGCAGCGACGTTTAAGAGCTATGCTGGAAACAGCATAGCACTCGTTCCTTTCGA	107
RBP_lib_71	ACCGGCCAACATACCtatcttgtggaaaggacgaaacaccggCGTATACTTCTTCACCAGCTGTTTAAGAGCTATGCTGGAAACAGCATAGCACTCGTTCCTTTCGA	107
RBP_lib_72	ACCGGCCAACATACCtatcttgtggaaaggacgaaacaccggCTGGAAGTCCGAGCCGTAAAGTTTAAGAGCTATGCTGGAAACAGCATAGCACTCGTTCCTTTCGA	107
RBP_lib_73	ACCGGCCAACATACCtatcttgtggaaaggacgaaacaccggAGCTCCGGTGCCCGCGGCTTGTTTAAGAGCTATGCTGGAAACAGCATAGCACTCGTTCCTTTCGA	107
RBP_lib_74	ACCGGCCAACATACCtatcttgtggaaaggacgaaacaccggCGGTGCCCGCGGCTTTGGCTGTTTAAGAGCTATGCTGGAAACAGCATAGCACTCGTTCCTTTCGA	107
RBP_lib_75	ACCGGCCAACATACCtatcttgtggaaaggacgaaacaccggCGAGCCAAAGCCGCGGGCACGTTTAAGAGCTATGCTGGAAACAGCATAGCACTCGTTCCTTTCGA	107
RBP_lib_76	ACCGGCCAACATACCtatcttgtggaaaggacgaaacaccggATCCGTTTCTGCGGCAGCTCGTTTAAGAGCTATGCTGGAAACAGCATAGCACTCGTTCCTTTCGA	107
RBP_lib_77	ACCGGCCAACATACCtatcttgtggaaaggacgaaacaccggGCAGCGGGTTCCACAGCTTTGTTTAAGAGCTATGCTGGAAACAGCATAGCACTCGTTCCTTTCGA	107
RBP_lib_78	ACCGGCCAACATACCtatcttgtggaaaggacgaaacaccggGCGATAAAACCCTAAAGCTGGTTTAAGAGCTATGCTGGAAACAGCATAGCACTCGTTCCTTTCGA	107
RBP_lib_79	ACCGGCCAACATACCtatcttgtggaaaggacgaaacaccggAAGCTGTGGAACCCGCTGCGGTTTAAGAGCTATGCTGGAAACAGCATAGCACTCGTTCCTTTCGA	107
RBP_lib_80	ACCGGCCAACATACCtatcttgtggaaaggacgaaacaccggCGGCTACGAAGTGCTAGATGGTTTAAGAGCTATGCTGGAAACAGCATAGCACTCGTTCCTTTCGA	107
RBP_lib_81	ACCGGCCAACATACCtatcttgtggaaaggacgaaacaccggTCGAGACGCGACTTCTCGAAGTTTAAGAGCTATGCTGGAAACAGCATAGCACTCGTTCCTTTCGA	107
RBP_lib_82	ACCGGCCAACATACCtatcttgtggaaaggacgaaacaccggTGATTGGAGAGTATGGACTCGTTTAAGAGCTATGCTGGAAACAGCATAGCACTCGTTCCTTTCGA	107
RBP_lib_83	ACCGGCCAACATACCtatcttgtggaaaggacgaaacaccggGTCGAGACGCGACTTCTCGAGTTTAAGAGCTATGCTGGAAACAGCATAGCACTCGTTCCTTTCGA	107
RBP_lib_84	ACCGGCCAACATACCtatcttgtggaaaggacgaaacaccggTCCAAACCTCACGTTTGTTCGTTTAAGAGCTATGCTGGAAACAGCATAGCACTCGTTCCTTTCGA	107
RBP_lib_85	ACCGGCCAACATACCtatcttgtggaaaggacgaaacaccggCTAAAGTTGATTGGAGAGTAGTTTAAGAGCTATGCTGGAAACAGCATAGCACTCGTTCCTTTCGA	107
RBP_lib_86	ACCGGCCAACATACCtatcttgtggaaaggacgaaacaccggCGAGAAGTCGCGTCTCGACCGTTTAAGAGCTATGCTGGAAACAGCATAGCACTCGTTCCTTTCGA	107
RBP_lib_87	ACCGGCCAACATACCtatcttgtggaaaggacgaaacaccggGACTTCTCGAAGGGTCTCCGGTTTAAGAGCTATGCTGGAAACAGCATAGCACTCGTTCCTTTCGA	107
RBP_lib_88	ACCGGCCAACATACCtatcttgtggaaaggacgaaacaccggACTTCTCGAAGGGTCTCCGTGTTTAAGAGCTATGCTGGAAACAGCATAGCACTCGTTCCTTTCGA	107
RBP_lib_89	ACCGGCCAACATACCtatcttgtggaaaggacgaaacaccggTAGTAGCGCTTCTGCGGCTGGTTTAAGAGCTATGCTGGAAACAGCATAGCACTCGTTCCTTTCGA	107
RBP_lib_90	ACCGGCCAACATACCtatcttgtggaaaggacgaaacaccggAGTAGCGCTTCTGCGGCTGGGTTTAAGAGCTATGCTGGAAACAGCATAGCACTCGTTCCTTTCGA	107
RBP_lib_91	ACCGGCCAACATACCtatcttgtggaaaggacgaaacaccggTGCCGGTAGTAGCGCTTCTGGTTTAAGAGCTATGCTGGAAACAGCATAGCACTCGTTCCTTTCGA	107
RBP_lib_92	ACCGGCCAACATACCtatcttgtggaaaggacgaaacaccggGTAGCGCTTCTGCGGCTGGGGTTTAAGAGCTATGCTGGAAACAGCATAGCACTCGTTCCTTTCGA	107
RBP_lib_93	ACCGGCCAACATACCtatcttgtggaaaggacgaaacaccggAGCCGCAGAAGCGCTACTACGTTTAAGAGCTATGCTGGAAACAGCATAGCACTCGTTCCTTTCGA	107
RBP_lib_94	ACCGGCCAACATACCtatcttgtggaaaggacgaaacaccggGGTTGGAGTGGGCGCGCTGCGTTTAAGAGCTATGCTGGAAACAGCATAGCACTCGTTCCTTTCGA	107
RBP_lib_95	ACCGGCCAACATACCtatcttgtggaaaggacgaaacaccggCTTCTGCGGCTGGGGGGCTTGTTTAAGAGCTATGCTGGAAACAGCATAGCACTCGTTCCTTTCGA	107
RBP_lib_96	ACCGGCCAACATACCtatcttgtggaaaggacgaaacaccggGCGCGCCCACTCCAACCCCAGTTTAAGAGCTATGCTGGAAACAGCATAGCACTCGTTCCTTTCGA	107
RBP_lib_97	ACCGGCCAACATACCtatcttgtggaaaggacgaaacaccggAGAAGCGACTGACGCTTTCGGTTTAAGAGCTATGCTGGAAACAGCATAGCACTCGTTCCTTTCGA	107
RBP_lib_98	ACCGGCCAACATACCtatcttgtggaaaggacgaaacaccggTTACCACCTGGAGGGGACTCGTTTAAGAGCTATGCTGGAAACAGCATAGCACTCGTTCCTTTCGA	107
RBP_lib_99	ACCGGCCAACATACCtatcttgtggaaaggacgaaacaccggGCGGGCTCATTACCACCTGGGTTTAAGAGCTATGCTGGAAACAGCATAGCACTCGTTCCTTTCGA	107
RBP_lib_100	ACCGGCCAACATACCtatcttgtggaaaggacgaaacaccggGACCCAGAGTCCCCTCCAGGGTTTAAGAGCTATGCTGGAAACAGCATAGCACTCGTTCCTTTCGA	107
RBP_lib_101	ACCGGCCAACATACCtatcttgtggaaaggacgaaacaccggGCAGCGGGCTCATTACCACCGTTTAAGAGCTATGCTGGAAACAGCATAGCACTCGTTCCTTTCGA	107
RBP_lib_102	ACCGGCCAACATACCtatcttgtggaaaggacgaaacaccggTCTGACCCAGAGTCCCCTCCGTTTAAGAGCTATGCTGGAAACAGCATAGCACTCGTTCCTTTCGA	107
RBP_lib_103	ACCGGCCAACATACCtatcttgtggaaaggacgaaacaccggTGATCTACTTGCTGGCATGGGTTTAAGAGCTATGCTGGAAACAGCATAGCACTCGTTCCTTTCGA	107
RBP_lib_104	ACCGGCCAACATACCtatcttgtggaaaggacgaaacaccggTACCACCTGGAGGGGACTCTGTTTAAGAGCTATGCTGGAAACAGCATAGCACTCGTTCCTTTCGA	107
RBP_lib_105	ACCGGCCAACATACCtatcttgtggaaaggacgaaacaccggAAGATAATCACTGATCGAACGTTTAAGAGCTATGCTGGAAACAGCATAGCACTCGTTCCTTTCGA	107
RBP_lib_106	ACCGGCCAACATACCtatcttgtggaaaggacgaaacaccggTGATCGAACTGGTGTGTCGAGTTTAAGAGCTATGCTGGAAACAGCATAGCACTCGTTCCTTTCGA	107
RBP_lib_107	ACCGGCCAACATACCtatcttgtggaaaggacgaaacaccggGATCGAACTGGTGTGTCGAAGTTTAAGAGCTATGCTGGAAACAGCATAGCACTCGTTCCTTTCGA	107
RBP_lib_108	ACCGGCCAACATACCtatcttgtggaaaggacgaaacaccggGGCAAAGAAACTCCTGATTTGTTTAAGAGCTATGCTGGAAACAGCATAGCACTCGTTCCTTTCGA	107
RBP_lib_109	ACCGGCCAACATACCtatcttgtggaaaggacgaaacaccggTCATCAGCAACCACAAGTCAGTTTAAGAGCTATGCTGGAAACAGCATAGCACTCGTTCCTTTCGA	107
RBP_lib_110	ACCGGCCAACATACCtatcttgtggaaaggacgaaacaccggTGCTGATGAAGACTGAGTGCGTTTAAGAGCTATGCTGGAAACAGCATAGCACTCGTTCCTTTCGA	107
RBP_lib_111	ACCGGCCAACATACCtatcttgtggaaaggacgaaacaccggTGAAACTGGGCCCTGCAATCGTTTAAGAGCTATGCTGGAAACAGCATAGCACTCGTTCCTTTCGA	107
RBP_lib_112	ACCGGCCAACATACCtatcttgtggaaaggacgaaacaccggAGGAGTTTCTTTGCCAGATAGTTTAAGAGCTATGCTGGAAACAGCATAGCACTCGTTCCTTTCGA	107
RBP_lib_113	ACCGGCCAACATACCtatcttgtggaaaggacgaaacaccggGGTCTCTGCCACCGCTGGTGGTTTAAGAGCTATGCTGGAAACAGCATAGCACTCGTTCCTTTCGA	107
RBP_lib_114	ACCGGCCAACATACCtatcttgtggaaaggacgaaacaccggTCAGGGGTCTCTGCCACCGCGTTTAAGAGCTATGCTGGAAACAGCATAGCACTCGTTCCTTTCGA	107
RBP_lib_115	ACCGGCCAACATACCtatcttgtggaaaggacgaaacaccggAGCATACCGTCCGGCACTGTGTTTAAGAGCTATGCTGGAAACAGCATAGCACTCGTTCCTTTCGA	107
RBP_lib_116	ACCGGCCAACATACCtatcttgtggaaaggacgaaacaccggGATCAACGATATTTCTCTGCGTTTAAGAGCTATGCTGGAAACAGCATAGCACTCGTTCCTTTCGA	107
RBP_lib_117	ACCGGCCAACATACCtatcttgtggaaaggacgaaacaccggGCATACCGTCCGGCACTGTGGTTTAAGAGCTATGCTGGAAACAGCATAGCACTCGTTCCTTTCGA	107
RBP_lib_118	ACCGGCCAACATACCtatcttgtggaaaggacgaaacaccggGCGCTTGGCAGCATACCGTCGTTTAAGAGCTATGCTGGAAACAGCATAGCACTCGTTCCTTTCGA	107
RBP_lib_119	ACCGGCCAACATACCtatcttgtggaaaggacgaaacaccggGTGGGAAGCAGCCACACCAGGTTTAAGAGCTATGCTGGAAACAGCATAGCACTCGTTCCTTTCGA	107
RBP_lib_120	ACCGGCCAACATACCtatcttgtggaaaggacgaaacaccggGGAAGCAGCCACACCAGCGGGTTTAAGAGCTATGCTGGAAACAGCATAGCACTCGTTCCTTTCGA	107
RBP_lib_121	ACCGGCCAACATACCtatcttgtggaaaggacgaaacaccggCGCCAGCGCCCATGAGTCGGGTTTAAGAGCTATGCTGGAAACAGCATAGCACTCGTTCCTTTCGA	107
RBP_lib_122	ACCGGCCAACATACCtatcttgtggaaaggacgaaacaccggCACCGCCAGCGCCCATGAGTGTTTAAGAGCTATGCTGGAAACAGCATAGCACTCGTTCCTTTCGA	107
RBP_lib_123	ACCGGCCAACATACCtatcttgtggaaaggacgaaacaccggCGACTCATGGGCGCTGGCGGGTTTAAGAGCTATGCTGGAAACAGCATAGCACTCGTTCCTTTCGA	107
RBP_lib_124	ACCGGCCAACATACCtatcttgtggaaaggacgaaacaccggCACCGACTCATGGGCGCTGGGTTTAAGAGCTATGCTGGAAACAGCATAGCACTCGTTCCTTTCGA	107
RBP_lib_125	ACCGGCCAACATACCtatcttgtggaaaggacgaaacaccggGGCCACCGACTCATGGGCGCGTTTAAGAGCTATGCTGGAAACAGCATAGCACTCGTTCCTTTCGA	107
RBP_lib_126	ACCGGCCAACATACCtatcttgtggaaaggacgaaacaccggGATGAGCAGTTTGCAGATCAGTTTAAGAGCTATGCTGGAAACAGCATAGCACTCGTTCCTTTCGA	107
RBP_lib_127	ACCGGCCAACATACCtatcttgtggaaaggacgaaacaccggGGCGCTGGCGGTGGACGAGCGTTTAAGAGCTATGCTGGAAACAGCATAGCACTCGTTCCTTTCGA	107
RBP_lib_128	ACCGGCCAACATACCtatcttgtggaaaggacgaaacaccggACTGTGCAATCAGGTTCTGTGTTTAAGAGCTATGCTGGAAACAGCATAGCACTCGTTCCTTTCGA	107
RBP_lib_129	ACCGGCCAACATACCtatcttgtggaaaggacgaaacaccggGGCCGGCCTGACCCTAGCGCGTTTAAGAGCTATGCTGGAAACAGCATAGCACTCGTTCCTTTCGA	107
RBP_lib_130	ACCGGCCAACATACCtatcttgtggaaaggacgaaacaccggGGCCGATCTTCCCGCGCTGCGTTTAAGAGCTATGCTGGAAACAGCATAGCACTCGTTCCTTTCGA	107
RBP_lib_131	ACCGGCCAACATACCtatcttgtggaaaggacgaaacaccggTGGGCGCCGCGGCAGAGCATGTTTAAGAGCTATGCTGGAAACAGCATAGCACTCGTTCCTTTCGA	107
RBP_lib_132	ACCGGCCAACATACCtatcttgtggaaaggacgaaacaccggGCCATTGTTGCCGGTGGTCGGTTTAAGAGCTATGCTGGAAACAGCATAGCACTCGTTCCTTTCGA	107
RBP_lib_133	ACCGGCCAACATACCtatcttgtggaaaggacgaaacaccggCGATCTTCCCGCGCTGCCGGGTTTAAGAGCTATGCTGGAAACAGCATAGCACTCGTTCCTTTCGA	107
RBP_lib_134	ACCGGCCAACATACCtatcttgtggaaaggacgaaacaccggCTGACCCTAGCGCTGGGCGCGTTTAAGAGCTATGCTGGAAACAGCATAGCACTCGTTCCTTTCGA	107
RBP_lib_135	ACCGGCCAACATACCtatcttgtggaaaggacgaaacaccggGGAAGATCGGCCGCGACCACGTTTAAGAGCTATGCTGGAAACAGCATAGCACTCGTTCCTTTCGA	107
RBP_lib_136	ACCGGCCAACATACCtatcttgtggaaaggacgaaacaccggAGCTACGACCCGCGCACGCGGTTTAAGAGCTATGCTGGAAACAGCATAGCACTCGTTCCTTTCGA	107
RBP_lib_137	ACCGGCCAACATACCtatcttgtggaaaggacgaaacaccggGGAGGAGACTCGCTCGGATGGTTTAAGAGCTATGCTGGAAACAGCATAGCACTCGTTCCTTTCGA	107
RBP_lib_138	ACCGGCCAACATACCtatcttgtggaaaggacgaaacaccggCATCCGAGCGAGTCTCCTCCGTTTAAGAGCTATGCTGGAAACAGCATAGCACTCGTTCCTTTCGA	107
RBP_lib_139	ACCGGCCAACATACCtatcttgtggaaaggacgaaacaccggCGAGATAGACGATGATGACTGTTTAAGAGCTATGCTGGAAACAGCATAGCACTCGTTCCTTTCGA	107
RBP_lib_140	ACCGGCCAACATACCtatcttgtggaaaggacgaaacaccggGAAGGACCCCAGTGACCGGAGTTTAAGAGCTATGCTGGAAACAGCATAGCACTCGTTCCTTTCGA	107
RBP_lib_141	ACCGGCCAACATACCtatcttgtggaaaggacgaaacaccggAAGCCAGGAGGAGACTCGCTGTTTAAGAGCTATGCTGGAAACAGCATAGCACTCGTTCCTTTCGA	107
RBP_lib_142	ACCGGCCAACATACCtatcttgtggaaaggacgaaacaccggCCTCAGGGACGAAGCCTCCTGTTTAAGAGCTATGCTGGAAACAGCATAGCACTCGTTCCTTTCGA	107
RBP_lib_143	ACCGGCCAACATACCtatcttgtggaaaggacgaaacaccggCGAGGAGGGGGATGATGTTGGTTTAAGAGCTATGCTGGAAACAGCATAGCACTCGTTCCTTTCGA	107
RBP_lib_144	ACCGGCCAACATACCtatcttgtggaaaggacgaaacaccggACGTGCAGTTTCCTTTAACCGTTTAAGAGCTATGCTGGAAACAGCATAGCACTCGTTCCTTTCGA	107
RBP_lib_145	ACCGGCCAACATACCtatcttgtggaaaggacgaaacaccggGACCATCGGCGAGAATGACGGTTTAAGAGCTATGCTGGAAACAGCATAGCACTCGTTCCTTTCGA	107
RBP_lib_146	ACCGGCCAACATACCtatcttgtggaaaggacgaaacaccggCGTCATTCTCGCCGATGGTCGTTTAAGAGCTATGCTGGAAACAGCATAGCACTCGTTCCTTTCGA	107
RBP_lib_147	ACCGGCCAACATACCtatcttgtggaaaggacgaaacaccggCACCTCGTCATTCTCGCCGAGTTTAAGAGCTATGCTGGAAACAGCATAGCACTCGTTCCTTTCGA	107
RBP_lib_148	ACCGGCCAACATACCtatcttgtggaaaggacgaaacaccggCTCGGCTTCATCCGGACCATGTTTAAGAGCTATGCTGGAAACAGCATAGCACTCGTTCCTTTCGA	107
RBP_lib_149	ACCGGCCAACATACCtatcttgtggaaaggacgaaacaccggCGGCGAGAATGACGAGGTGCGTTTAAGAGCTATGCTGGAAACAGCATAGCACTCGTTCCTTTCGA	107
RBP_lib_150	ACCGGCCAACATACCtatcttgtggaaaggacgaaacaccggGAGTCCGACTCGGGCTCAACGTTTAAGAGCTATGCTGGAAACAGCATAGCACTCGTTCCTTTCGA	107
RBP_lib_151	ACCGGCCAACATACCtatcttgtggaaaggacgaaacaccggGTCGGACTCCGGAGACGAGGGTTTAAGAGCTATGCTGGAAACAGCATAGCACTCGTTCCTTTCGA	107
RBP_lib_152	ACCGGCCAACATACCtatcttgtggaaaggacgaaacaccggTGGCGGAGCTCGGCTTCATCGTTTAAGAGCTATGCTGGAAACAGCATAGCACTCGTTCCTTTCGA	107
RBP_lib_153	ACCGGCCAACATACCtatcttgtggaaaggacgaaacaccggGTTCACGTTCGCCTTTGAGCGTTTAAGAGCTATGCTGGAAACAGCATAGCACTCGTTCCTTTCGA	107
RBP_lib_154	ACCGGCCAACATACCtatcttgtggaaaggacgaaacaccggCGATTCCACATCCAGCTCAAGTTTAAGAGCTATGCTGGAAACAGCATAGCACTCGTTCCTTTCGA	107
RBP_lib_155	ACCGGCCAACATACCtatcttgtggaaaggacgaaacaccggGTTCGCCTTTGAGCTGGATGGTTTAAGAGCTATGCTGGAAACAGCATAGCACTCGTTCCTTTCGA	107
RBP_lib_156	ACCGGCCAACATACCtatcttgtggaaaggacgaaacaccggGAACGTGAACCCTTGCAGCCGTTTAAGAGCTATGCTGGAAACAGCATAGCACTCGTTCCTTTCGA	107
RBP_lib_157	ACCGGCCAACATACCtatcttgtggaaaggacgaaacaccggGTGGAATCGCAGAAGGGCACGTTTAAGAGCTATGCTGGAAACAGCATAGCACTCGTTCCTTTCGA	107
RBP_lib_158	ACCGGCCAACATACCtatcttgtggaaaggacgaaacaccggGCTGGATGTGGAATCGCAGAGTTTAAGAGCTATGCTGGAAACAGCATAGCACTCGTTCCTTTCGA	107
RBP_lib_159	ACCGGCCAACATACCtatcttgtggaaaggacgaaacaccggTGGAATCGCAGAAGGGCACTGTTTAAGAGCTATGCTGGAAACAGCATAGCACTCGTTCCTTTCGA	107
RBP_lib_160	ACCGGCCAACATACCtatcttgtggaaaggacgaaacaccggCACTGGGCTACTGCCTTTCCGTTTAAGAGCTATGCTGGAAACAGCATAGCACTCGTTCCTTTCGA	107
RBP_lib_161	ACCGGCCAACATACCtatcttgtggaaaggacgaaacaccggCGCACCTCGACGGGCAGTCCGTTTAAGAGCTATGCTGGAAACAGCATAGCACTCGTTCCTTTCGA	107
RBP_lib_162	ACCGGCCAACATACCtatcttgtggaaaggacgaaacaccggGGACTGCCCGTCGAGGTGCGGTTTAAGAGCTATGCTGGAAACAGCATAGCACTCGTTCCTTTCGA	107
RBP_lib_163	ACCGGCCAACATACCtatcttgtggaaaggacgaaacaccggGGGACTGCCCGTCGAGGTGCGTTTAAGAGCTATGCTGGAAACAGCATAGCACTCGTTCCTTTCGA	107
RBP_lib_164	ACCGGCCAACATACCtatcttgtggaaaggacgaaacaccggCGGGACTGCCCGTCGAGGTGGTTTAAGAGCTATGCTGGAAACAGCATAGCACTCGTTCCTTTCGA	107
RBP_lib_165	ACCGGCCAACATACCtatcttgtggaaaggacgaaacaccggCGAGGTGCGGGGCTCCAACGGTTTAAGAGCTATGCTGGAAACAGCATAGCACTCGTTCCTTTCGA	107
RBP_lib_166	ACCGGCCAACATACCtatcttgtggaaaggacgaaacaccggCGGTAGTCGGACATCCCCAAGTTTAAGAGCTATGCTGGAAACAGCATAGCACTCGTTCCTTTCGA	107
RBP_lib_167	ACCGGCCAACATACCtatcttgtggaaaggacgaaacaccggTTGGAGCCCCGCACCTCGACGTTTAAGAGCTATGCTGGAAACAGCATAGCACTCGTTCCTTTCGA	107
RBP_lib_168	ACCGGCCAACATACCtatcttgtggaaaggacgaaacaccggGTTGGAGCCCCGCACCTCGAGTTTAAGAGCTATGCTGGAAACAGCATAGCACTCGTTCCTTTCGA	107
RBP_lib_169	ACCGGCCAACATACCtatcttgtggaaaggacgaaacaccggCGAGCAACAACGTTCCAGTTGTTTAAGAGCTATGCTGGAAACAGCATAGCACTCGTTCCTTTCGA	107
RBP_lib_170	ACCGGCCAACATACCtatcttgtggaaaggacgaaacaccggACCGCCTGGGGCCTACGCTGGTTTAAGAGCTATGCTGGAAACAGCATAGCACTCGTTCCTTTCGA	107
RBP_lib_171	ACCGGCCAACATACCtatcttgtggaaaggacgaaacaccggACAACGTTCCAGTTCGGCTCGTTTAAGAGCTATGCTGGAAACAGCATAGCACTCGTTCCTTTCGA	107
RBP_lib_172	ACCGGCCAACATACCtatcttgtggaaaggacgaaacaccggGACCGCCTGGGGCCTACGCTGTTTAAGAGCTATGCTGGAAACAGCATAGCACTCGTTCCTTTCGA	107
RBP_lib_173	ACCGGCCAACATACCtatcttgtggaaaggacgaaacaccggTTCGGCTCAGGCCCCAGCGTGTTTAAGAGCTATGCTGGAAACAGCATAGCACTCGTTCCTTTCGA	107
RBP_lib_174	ACCGGCCAACATACCtatcttgtggaaaggacgaaacaccggCGACCGCCTGGGGCCTACGCGTTTAAGAGCTATGCTGGAAACAGCATAGCACTCGTTCCTTTCGA	107
RBP_lib_175	ACCGGCCAACATACCtatcttgtggaaaggacgaaacaccggTATCCGCGCCCTTGGACTCGGTTTAAGAGCTATGCTGGAAACAGCATAGCACTCGTTCCTTTCGA	107
RBP_lib_176	ACCGGCCAACATACCtatcttgtggaaaggacgaaacaccggCGCTGGGGCCTGAGCCGAACGTTTAAGAGCTATGCTGGAAACAGCATAGCACTCGTTCCTTTCGA	107
RBP_lib_177	ACCGGCCAACATACCtatcttgtggaaaggacgaaacaccggGGAGGACAAGCCCCGAGGTAGTTTAAGAGCTATGCTGGAAACAGCATAGCACTCGTTCCTTTCGA	107
RBP_lib_178	ACCGGCCAACATACCtatcttgtggaaaggacgaaacaccggAATGACCAATCCCGCTTTCCGTTTAAGAGCTATGCTGGAAACAGCATAGCACTCGTTCCTTTCGA	107
RBP_lib_179	ACCGGCCAACATACCtatcttgtggaaaggacgaaacaccggGTATGCCAGGAAAGCGGGATGTTTAAGAGCTATGCTGGAAACAGCATAGCACTCGTTCCTTTCGA	107
RBP_lib_180	ACCGGCCAACATACCtatcttgtggaaaggacgaaacaccggTTTGGAGTATGCCAGGAAAGGTTTAAGAGCTATGCTGGAAACAGCATAGCACTCGTTCCTTTCGA	107
RBP_lib_181	ACCGGCCAACATACCtatcttgtggaaaggacgaaacaccggGGTCATTCCACAGGAACGGTGTTTAAGAGCTATGCTGGAAACAGCATAGCACTCGTTCCTTTCGA	107
RBP_lib_182	ACCGGCCAACATACCtatcttgtggaaaggacgaaacaccggGATTGGTCATTCCACAGGAAGTTTAAGAGCTATGCTGGAAACAGCATAGCACTCGTTCCTTTCGA	107
RBP_lib_183	ACCGGCCAACATACCtatcttgtggaaaggacgaaacaccggATGGCGGCCCCCGTACCTCGGTTTAAGAGCTATGCTGGAAACAGCATAGCACTCGTTCCTTTCGA	107
RBP_lib_184	ACCGGCCAACATACCtatcttgtggaaaggacgaaacaccggGGACAAGCCCCGAGGTACGGGTTTAAGAGCTATGCTGGAAACAGCATAGCACTCGTTCCTTTCGA	107
RBP_lib_185	ACCGGCCAACATACCtatcttgtggaaaggacgaaacaccggCAAAGCGCGACGCCAGTTCTGTTTAAGAGCTATGCTGGAAACAGCATAGCACTCGTTCCTTTCGA	107
RBP_lib_186	ACCGGCCAACATACCtatcttgtggaaaggacgaaacaccggCGACGCCAGTTCTCGGGTGCGTTTAAGAGCTATGCTGGAAACAGCATAGCACTCGTTCCTTTCGA	107
RBP_lib_187	ACCGGCCAACATACCtatcttgtggaaaggacgaaacaccggAAAGCGCGACGCCAGTTCTCGTTTAAGAGCTATGCTGGAAACAGCATAGCACTCGTTCCTTTCGA	107
RBP_lib_188	ACCGGCCAACATACCtatcttgtggaaaggacgaaacaccggCTGGCGTCGCGCTTTGTGAGGTTTAAGAGCTATGCTGGAAACAGCATAGCACTCGTTCCTTTCGA	107
RBP_lib_189	ACCGGCCAACATACCtatcttgtggaaaggacgaaacaccggGAGGGGGACGTCCCGAACCCGTTTAAGAGCTATGCTGGAAACAGCATAGCACTCGTTCCTTTCGA	107
RBP_lib_190	ACCGGCCAACATACCtatcttgtggaaaggacgaaacaccggCCGGCCGCGATGGTTATCCCGTTTAAGAGCTATGCTGGAAACAGCATAGCACTCGTTCCTTTCGA	107
RBP_lib_191	ACCGGCCAACATACCtatcttgtggaaaggacgaaacaccggGATAACCATCGCGGCCGGGAGTTTAAGAGCTATGCTGGAAACAGCATAGCACTCGTTCCTTTCGA	107
RBP_lib_192	ACCGGCCAACATACCtatcttgtggaaaggacgaaacaccggGGATAACCATCGCGGCCGGGGTTTAAGAGCTATGCTGGAAACAGCATAGCACTCGTTCCTTTCGA	107
RBP_lib_193	ACCGGCCAACATACCtatcttgtggaaaggacgaaacaccggCCCGACGGGACGTACGAGCCGTTTAAGAGCTATGCTGGAAACAGCATAGCACTCGTTCCTTTCGA	107
RBP_lib_194	ACCGGCCAACATACCtatcttgtggaaaggacgaaacaccggACGTACGAGCCTGGCTTCGTGTTTAAGAGCTATGCTGGAAACAGCATAGCACTCGTTCCTTTCGA	107
RBP_lib_195	ACCGGCCAACATACCtatcttgtggaaaggacgaaacaccggCCAGGCTCGTACGTCCCGTCGTTTAAGAGCTATGCTGGAAACAGCATAGCACTCGTTCCTTTCGA	107
RBP_lib_196	ACCGGCCAACATACCtatcttgtggaaaggacgaaacaccggGACGTACGAGCCTGGCTTCGGTTTAAGAGCTATGCTGGAAACAGCATAGCACTCGTTCCTTTCGA	107
RBP_lib_197	ACCGGCCAACATACCtatcttgtggaaaggacgaaacaccggGCCAGGCTCGTACGTCCCGTGTTTAAGAGCTATGCTGGAAACAGCATAGCACTCGTTCCTTTCGA	107
RBP_lib_198	ACCGGCCAACATACCtatcttgtggaaaggacgaaacaccggCCGGAATTGCGATTACCAGCGTTTAAGAGCTATGCTGGAAACAGCATAGCACTCGTTCCTTTCGA	107
RBP_lib_199	ACCGGCCAACATACCtatcttgtggaaaggacgaaacaccggCGTGGGTATTCGGTTCTGCCGTTTAAGAGCTATGCTGGAAACAGCATAGCACTCGTTCCTTTCGA	107
RBP_lib_200	ACCGGCCAACATACCtatcttgtggaaaggacgaaacaccggAACCGAATACCCACGAAGCCGTTTAAGAGCTATGCTGGAAACAGCATAGCACTCGTTCCTTTCGA	107
RBP_lib_201	ACCGGCCAACATACCtatcttgtggaaaggacgaaacaccggCTGGCATCGCCATCTACGTCGTTTAAGAGCTATGCTGGAAACAGCATAGCACTCGTTCCTTTCGA	107
RBP_lib_202	ACCGGCCAACATACCtatcttgtggaaaggacgaaacaccggAGCCACGTCACGCCAACAACGTTTAAGAGCTATGCTGGAAACAGCATAGCACTCGTTCCTTTCGA	107
RBP_lib_203	ACCGGCCAACATACCtatcttgtggaaaggacgaaacaccggAATTTGGGGCAAGTTTATACGTTTAAGAGCTATGCTGGAAACAGCATAGCACTCGTTCCTTTCGA	107
RBP_lib_204	ACCGGCCAACATACCtatcttgtggaaaggacgaaacaccggGTTGTTGGCGTGACGTGGCTGTTTAAGAGCTATGCTGGAAACAGCATAGCACTCGTTCCTTTCGA	107
RBP_lib_205	ACCGGCCAACATACCtatcttgtggaaaggacgaaacaccggGATAAGCTGCGATTTAACTGGTTTAAGAGCTATGCTGGAAACAGCATAGCACTCGTTCCTTTCGA	107
RBP_lib_206	ACCGGCCAACATACCtatcttgtggaaaggacgaaacaccggCCCCTGTTGTTGGCGTGACGGTTTAAGAGCTATGCTGGAAACAGCATAGCACTCGTTCCTTTCGA	107
RBP_lib_207	ACCGGCCAACATACCtatcttgtggaaaggacgaaacaccggTGCACTAGGCCTTCCAATGAGTTTAAGAGCTATGCTGGAAACAGCATAGCACTCGTTCCTTTCGA	107
RBP_lib_208	ACCGGCCAACATACCtatcttgtggaaaggacgaaacaccggTTAAATCGCAGCTTATCACAGTTTAAGAGCTATGCTGGAAACAGCATAGCACTCGTTCCTTTCGA	107
RBP_lib_209	ACCGGCCAACATACCtatcttgtggaaaggacgaaacaccggGAGAGCGGAATACCCTCGCCGTTTAAGAGCTATGCTGGAAACAGCATAGCACTCGTTCCTTTCGA	107
RBP_lib_210	ACCGGCCAACATACCtatcttgtggaaaggacgaaacaccggGGTATTCCGCTCTCCAACGGGTTTAAGAGCTATGCTGGAAACAGCATAGCACTCGTTCCTTTCGA	107
RBP_lib_211	ACCGGCCAACATACCtatcttgtggaaaggacgaaacaccggATTCCGCTCTCCAACGGGGGGTTTAAGAGCTATGCTGGAAACAGCATAGCACTCGTTCCTTTCGA	107
RBP_lib_212	ACCGGCCAACATACCtatcttgtggaaaggacgaaacaccggGGGTATTCCGCTCTCCAACGGTTTAAGAGCTATGCTGGAAACAGCATAGCACTCGTTCCTTTCGA	107
RBP_lib_213	ACCGGCCAACATACCtatcttgtggaaaggacgaaacaccggGAGGGTATTCCGCTCTCCAAGTTTAAGAGCTATGCTGGAAACAGCATAGCACTCGTTCCTTTCGA	107
RBP_lib_214	ACCGGCCAACATACCtatcttgtggaaaggacgaaacaccggAGTACCGCCTGAAGAAGCGAGTTTAAGAGCTATGCTGGAAACAGCATAGCACTCGTTCCTTTCGA	107
RBP_lib_215	ACCGGCCAACATACCtatcttgtggaaaggacgaaacaccggGGAATACCCTCGCCAGGCCCGTTTAAGAGCTATGCTGGAAACAGCATAGCACTCGTTCCTTTCGA	107
RBP_lib_216	ACCGGCCAACATACCtatcttgtggaaaggacgaaacaccggTCTGGACAACATGCCCCCCAGTTTAAGAGCTATGCTGGAAACAGCATAGCACTCGTTCCTTTCGA	107
RBP_lib_217	ACCGGCCAACATACCtatcttgtggaaaggacgaaacaccggCGGGACCTTAGCGAAGATCGGTTTAAGAGCTATGCTGGAAACAGCATAGCACTCGTTCCTTTCGA	107
RBP_lib_218	ACCGGCCAACATACCtatcttgtggaaaggacgaaacaccggGATCTCCGCGATCTTCGCTAGTTTAAGAGCTATGCTGGAAACAGCATAGCACTCGTTCCTTTCGA	107
RBP_lib_219	ACCGGCCAACATACCtatcttgtggaaaggacgaaacaccggTAGCAAGGCGAGCCTTAAGCGTTTAAGAGCTATGCTGGAAACAGCATAGCACTCGTTCCTTTCGA	107
RBP_lib_220	ACCGGCCAACATACCtatcttgtggaaaggacgaaacaccggGGCGAGCCTTAAGCAGGCCAGTTTAAGAGCTATGCTGGAAACAGCATAGCACTCGTTCCTTTCGA	107
RBP_lib_221	ACCGGCCAACATACCtatcttgtggaaaggacgaaacaccggATCACTCCTAAAGGTGGCGGGTTTAAGAGCTATGCTGGAAACAGCATAGCACTCGTTCCTTTCGA	107
RBP_lib_222	ACCGGCCAACATACCtatcttgtggaaaggacgaaacaccggGTTCTCTTCGAAGTTTAGCAGTTTAAGAGCTATGCTGGAAACAGCATAGCACTCGTTCCTTTCGA	107
RBP_lib_223	ACCGGCCAACATACCtatcttgtggaaaggacgaaacaccggCTCCTAAAGGTGGCGGCGGCGTTTAAGAGCTATGCTGGAAACAGCATAGCACTCGTTCCTTTCGA	107
RBP_lib_224	ACCGGCCAACATACCtatcttgtggaaaggacgaaacaccggAGAGAACTCATCACTCCTAAGTTTAAGAGCTATGCTGGAAACAGCATAGCACTCGTTCCTTTCGA	107
RBP_lib_225	ACCGGCCAACATACCtatcttgtggaaaggacgaaacaccggTACGATTTCATACTATTTGTGTTTAAGAGCTATGCTGGAAACAGCATAGCACTCGTTCCTTTCGA	107
RBP_lib_226	ACCGGCCAACATACCtatcttgtggaaaggacgaaacaccggTTGCACCGGCTTCCTCAGTGGTTTAAGAGCTATGCTGGAAACAGCATAGCACTCGTTCCTTTCGA	107
RBP_lib_227	ACCGGCCAACATACCtatcttgtggaaaggacgaaacaccggATTTCATACTATTTGTAGGCGTTTAAGAGCTATGCTGGAAACAGCATAGCACTCGTTCCTTTCGA	107
RBP_lib_228	ACCGGCCAACATACCtatcttgtggaaaggacgaaacaccggTTCTAATGAATCTACGTCAAGTTTAAGAGCTATGCTGGAAACAGCATAGCACTCGTTCCTTTCGA	107
RBP_lib_229	ACCGGCCAACATACCtatcttgtggaaaggacgaaacaccggTCTTAGCATGGTGTAGACATGTTTAAGAGCTATGCTGGAAACAGCATAGCACTCGTTCCTTTCGA	107
RBP_lib_230	ACCGGCCAACATACCtatcttgtggaaaggacgaaacaccggATCTGCTGGGTGCCCGGTCCGTTTAAGAGCTATGCTGGAAACAGCATAGCACTCGTTCCTTTCGA	107
RBP_lib_231	ACCGGCCAACATACCtatcttgtggaaaggacgaaacaccggGCTAAGAGTCTTCTTTGACTGTTTAAGAGCTATGCTGGAAACAGCATAGCACTCGTTCCTTTCGA	107
RBP_lib_232	ACCGGCCAACATACCtatcttgtggaaaggacgaaacaccggCTCTTAGCATGGTGTAGACAGTTTAAGAGCTATGCTGGAAACAGCATAGCACTCGTTCCTTTCGA	107
RBP_lib_233	ACCGGCCAACATACCtatcttgtggaaaggacgaaacaccggCAAACGACTGATTCTTCGTAGTTTAAGAGCTATGCTGGAAACAGCATAGCACTCGTTCCTTTCGA	107
RBP_lib_234	ACCGGCCAACATACCtatcttgtggaaaggacgaaacaccggTCTTCGTATGGACAAAACTAGTTTAAGAGCTATGCTGGAAACAGCATAGCACTCGTTCCTTTCGA	107
RBP_lib_235	ACCGGCCAACATACCtatcttgtggaaaggacgaaacaccggTATGGTGGTTACTCCGGTTAGTTTAAGAGCTATGCTGGAAACAGCATAGCACTCGTTCCTTTCGA	107
RBP_lib_236	ACCGGCCAACATACCtatcttgtggaaaggacgaaacaccggTCGTATGGACAAAACTATGGGTTTAAGAGCTATGCTGGAAACAGCATAGCACTCGTTCCTTTCGA	107
RBP_lib_237	ACCGGCCAACATACCtatcttgtggaaaggacgaaacaccggCAAAACTATGGTGGTTACTCGTTTAAGAGCTATGCTGGAAACAGCATAGCACTCGTTCCTTTCGA	107
RBP_lib_238	ACCGGCCAACATACCtatcttgtggaaaggacgaaacaccggTAGTCTGACTGGCCATATGAGTTTAAGAGCTATGCTGGAAACAGCATAGCACTCGTTCCTTTCGA	107
RBP_lib_239	ACCGGCCAACATACCtatcttgtggaaaggacgaaacaccggCTTGCTGACCATAGTCTGACGTTTAAGAGCTATGCTGGAAACAGCATAGCACTCGTTCCTTTCGA	107
RBP_lib_240	ACCGGCCAACATACCtatcttgtggaaaggacgaaacaccggGCTGATCATAACCTGACTGCGTTTAAGAGCTATGCTGGAAACAGCATAGCACTCGTTCCTTTCGA	107
RBP_lib_241	ACCGGCCAACATACCtatcttgtggaaaggacgaaacaccggAGAGGACGGGCTCCATCAAGGTTTAAGAGCTATGCTGGAAACAGCATAGCACTCGTTCCTTTCGA	107
RBP_lib_242	ACCGGCCAACATACCtatcttgtggaaaggacgaaacaccggTATGTTATCGACCTCCTGACGTTTAAGAGCTATGCTGGAAACAGCATAGCACTCGTTCCTTTCGA	107
RBP_lib_243	ACCGGCCAACATACCtatcttgtggaaaggacgaaacaccggCTGTCCGTCCAAGATATAGAGTTTAAGAGCTATGCTGGAAACAGCATAGCACTCGTTCCTTTCGA	107
RBP_lib_244	ACCGGCCAACATACCtatcttgtggaaaggacgaaacaccggAGGAGCAACAGCCACCGGGCGTTTAAGAGCTATGCTGGAAACAGCATAGCACTCGTTCCTTTCGA	107
RBP_lib_245	ACCGGCCAACATACCtatcttgtggaaaggacgaaacaccggCACGTCGTCTTCCGGCAGTGGTTTAAGAGCTATGCTGGAAACAGCATAGCACTCGTTCCTTTCGA	107
RBP_lib_246	ACCGGCCAACATACCtatcttgtggaaaggacgaaacaccggCCTGCAGGTCCCAACACACGGTTTAAGAGCTATGCTGGAAACAGCATAGCACTCGTTCCTTTCGA	107
RBP_lib_247	ACCGGCCAACATACCtatcttgtggaaaggacgaaacaccggCATGCTGTTAGCAAGAGGACGTTTAAGAGCTATGCTGGAAACAGCATAGCACTCGTTCCTTTCGA	107
RBP_lib_248	ACCGGCCAACATACCtatcttgtggaaaggacgaaacaccggCCACGTGTGTTGGGACCTGCGTTTAAGAGCTATGCTGGAAACAGCATAGCACTCGTTCCTTTCGA	107
RBP_lib_249	ACCGGCCAACATACCtatcttgtggaaaggacgaaacaccggAAAAACGCCGCACGCCACCAGTTTAAGAGCTATGCTGGAAACAGCATAGCACTCGTTCCTTTCGA	107
RBP_lib_250	ACCGGCCAACATACCtatcttgtggaaaggacgaaacaccggGCTCGGGCCCATGCCCAACGGTTTAAGAGCTATGCTGGAAACAGCATAGCACTCGTTCCTTTCGA	107
RBP_lib_251	ACCGGCCAACATACCtatcttgtggaaaggacgaaacaccggGCTCACGTCGATGTCCTCGTGTTTAAGAGCTATGCTGGAAACAGCATAGCACTCGTTCCTTTCGA	107
RBP_lib_252	ACCGGCCAACATACCtatcttgtggaaaggacgaaacaccggGAAAAACGCCGCACGCCACCGTTTAAGAGCTATGCTGGAAACAGCATAGCACTCGTTCCTTTCGA	107
RBP_lib_253	ACCGGCCAACATACCtatcttgtggaaaggacgaaacaccggTTCGGAATTGGGAGATGCCGGTTTAAGAGCTATGCTGGAAACAGCATAGCACTCGTTCCTTTCGA	107
RBP_lib_254	ACCGGCCAACATACCtatcttgtggaaaggacgaaacaccggGTCGATGTCCTCGTTGGGCAGTTTAAGAGCTATGCTGGAAACAGCATAGCACTCGTTCCTTTCGA	107
RBP_lib_255	ACCGGCCAACATACCtatcttgtggaaaggacgaaacaccggGGCGGTACCGCTCGAAGCTCGTTTAAGAGCTATGCTGGAAACAGCATAGCACTCGTTCCTTTCGA	107
RBP_lib_256	ACCGGCCAACATACCtatcttgtggaaaggacgaaacaccggGCTTCGAGCGGTACCGCCGCGTTTAAGAGCTATGCTGGAAACAGCATAGCACTCGTTCCTTTCGA	107
RBP_lib_257	ACCGGCCAACATACCtatcttgtggaaaggacgaaacaccggCCGTCGCCCGAGGTGGAGTCGTTTAAGAGCTATGCTGGAAACAGCATAGCACTCGTTCCTTTCGA	107
RBP_lib_258	ACCGGCCAACATACCtatcttgtggaaaggacgaaacaccggCCGGACTCCACCTCGGGCGAGTTTAAGAGCTATGCTGGAAACAGCATAGCACTCGTTCCTTTCGA	107
RBP_lib_259	ACCGGCCAACATACCtatcttgtggaaaggacgaaacaccggAGACACTCGCAGGCCGCGGAGTTTAAGAGCTATGCTGGAAACAGCATAGCACTCGTTCCTTTCGA	107
RBP_lib_260	ACCGGCCAACATACCtatcttgtggaaaggacgaaacaccggCGGCTCGCCACGCTCCAAACGTTTAAGAGCTATGCTGGAAACAGCATAGCACTCGTTCCTTTCGA	107
RBP_lib_261	ACCGGCCAACATACCtatcttgtggaaaggacgaaacaccggGCCCGAGGTGGAGTCCGGTTGTTTAAGAGCTATGCTGGAAACAGCATAGCACTCGTTCCTTTCGA	107
RBP_lib_262	ACCGGCCAACATACCtatcttgtggaaaggacgaaacaccggTTTGGGGCTTCCGTCGCCCGGTTTAAGAGCTATGCTGGAAACAGCATAGCACTCGTTCCTTTCGA	107
RBP_lib_263	ACCGGCCAACATACCtatcttgtggaaaggacgaaacaccggCGGTTTGGAGCGTGGCGAGCGTTTAAGAGCTATGCTGGAAACAGCATAGCACTCGTTCCTTTCGA	107
RBP_lib_264	ACCGGCCAACATACCtatcttgtggaaaggacgaaacaccggCGGCCTGCGAGTGTCTGTGAGTTTAAGAGCTATGCTGGAAACAGCATAGCACTCGTTCCTTTCGA	107
RBP_lib_265	ACCGGCCAACATACCtatcttgtggaaaggacgaaacaccggGGCTCGTTCGGGCCTTGTTAGTTTAAGAGCTATGCTGGAAACAGCATAGCACTCGTTCCTTTCGA	107
RBP_lib_266	ACCGGCCAACATACCtatcttgtggaaaggacgaaacaccggGCTCGTTCGGGCCTTGTTAGGTTTAAGAGCTATGCTGGAAACAGCATAGCACTCGTTCCTTTCGA	107
RBP_lib_267	ACCGGCCAACATACCtatcttgtggaaaggacgaaacaccggGGTACTGCGCTGGGCTCGTTGTTTAAGAGCTATGCTGGAAACAGCATAGCACTCGTTCCTTTCGA	107
RBP_lib_268	ACCGGCCAACATACCtatcttgtggaaaggacgaaacaccggGGGCTCGTTCGGGCCTTGTTGTTTAAGAGCTATGCTGGAAACAGCATAGCACTCGTTCCTTTCGA	107
RBP_lib_269	ACCGGCCAACATACCtatcttgtggaaaggacgaaacaccggGTACTGCGCTGGGCTCGTTCGTTTAAGAGCTATGCTGGAAACAGCATAGCACTCGTTCCTTTCGA	107
RBP_lib_270	ACCGGCCAACATACCtatcttgtggaaaggacgaaacaccggCCCCCAGGCGGTACTGCGCTGTTTAAGAGCTATGCTGGAAACAGCATAGCACTCGTTCCTTTCGA	107
RBP_lib_271	ACCGGCCAACATACCtatcttgtggaaaggacgaaacaccggGGCCTTGTTAGGGGCCCGACGTTTAAGAGCTATGCTGGAAACAGCATAGCACTCGTTCCTTTCGA	107
RBP_lib_272	ACCGGCCAACATACCtatcttgtggaaaggacgaaacaccggGCCCCCAGGCGGTACTGCGCGTTTAAGAGCTATGCTGGAAACAGCATAGCACTCGTTCCTTTCGA	107
RBP_lib_273	ACCGGCCAACATACCtatcttgtggaaaggacgaaacaccggCGAGGATGACCACCCCGGCAGTTTAAGAGCTATGCTGGAAACAGCATAGCACTCGTTCCTTTCGA	107
RBP_lib_274	ACCGGCCAACATACCtatcttgtggaaaggacgaaacaccggGTACTACCCCACGGCCGAGGGTTTAAGAGCTATGCTGGAAACAGCATAGCACTCGTTCCTTTCGA	107
RBP_lib_275	ACCGGCCAACATACCtatcttgtggaaaggacgaaacaccggACCGTACACCTCCTCGGCCGGTTTAAGAGCTATGCTGGAAACAGCATAGCACTCGTTCCTTTCGA	107
RBP_lib_276	ACCGGCCAACATACCtatcttgtggaaaggacgaaacaccggCCGTACACCTCCTCGGCCGTGTTTAAGAGCTATGCTGGAAACAGCATAGCACTCGTTCCTTTCGA	107
RBP_lib_277	ACCGGCCAACATACCtatcttgtggaaaggacgaaacaccggGAAGTACTACCCCACGGCCGGTTTAAGAGCTATGCTGGAAACAGCATAGCACTCGTTCCTTTCGA	107
RBP_lib_278	ACCGGCCAACATACCtatcttgtggaaaggacgaaacaccggCTCGGGACCGTACACCTCCTGTTTAAGAGCTATGCTGGAAACAGCATAGCACTCGTTCCTTTCGA	107
RBP_lib_279	ACCGGCCAACATACCtatcttgtggaaaggacgaaacaccggCGTACACCTCCTCGGCCGTGGTTTAAGAGCTATGCTGGAAACAGCATAGCACTCGTTCCTTTCGA	107
RBP_lib_280	ACCGGCCAACATACCtatcttgtggaaaggacgaaacaccggACCCGTCACGGTGTATGAGAGTTTAAGAGCTATGCTGGAAACAGCATAGCACTCGTTCCTTTCGA	107
RBP_lib_281	ACCGGCCAACATACCtatcttgtggaaaggacgaaacaccggCGAGTACGCCGCGGAGATCAGTTTAAGAGCTATGCTGGAAACAGCATAGCACTCGTTCCTTTCGA	107
RBP_lib_282	ACCGGCCAACATACCtatcttgtggaaaggacgaaacaccggCGTGATCTCCGCGGCGTACTGTTTAAGAGCTATGCTGGAAACAGCATAGCACTCGTTCCTTTCGA	107
RBP_lib_283	ACCGGCCAACATACCtatcttgtggaaaggacgaaacaccggCGTACTCGGAGAACATTCGGGTTTAAGAGCTATGCTGGAAACAGCATAGCACTCGTTCCTTTCGA	107
RBP_lib_284	ACCGGCCAACATACCtatcttgtggaaaggacgaaacaccggCGAGAACCGGAGGCGCTACGGTTTAAGAGCTATGCTGGAAACAGCATAGCACTCGTTCCTTTCGA	107
RBP_lib_285	ACCGGCCAACATACCtatcttgtggaaaggacgaaacaccggCTCGTAGCGCCTCCGGTTCTGTTTAAGAGCTATGCTGGAAACAGCATAGCACTCGTTCCTTTCGA	107
RBP_lib_286	ACCGGCCAACATACCtatcttgtggaaaggacgaaacaccggCGTAGCGCCTCCGGTTCTCGGTTTAAGAGCTATGCTGGAAACAGCATAGCACTCGTTCCTTTCGA	107
RBP_lib_287	ACCGGCCAACATACCtatcttgtggaaaggacgaaacaccggGCGGTTCACCTCCGCCTTTCGTTTAAGAGCTATGCTGGAAACAGCATAGCACTCGTTCCTTTCGA	107
RBP_lib_288	ACCGGCCAACATACCtatcttgtggaaaggacgaaacaccggTCGTAGCGCCTCCGGTTCTCGTTTAAGAGCTATGCTGGAAACAGCATAGCACTCGTTCCTTTCGA	107
RBP_lib_289	ACCGGCCAACATACCtatcttgtggaaaggacgaaacaccggTGTGATGACAACAACGACCCGTTTAAGAGCTATGCTGGAAACAGCATAGCACTCGTTCCTTTCGA	107
RBP_lib_290	ACCGGCCAACATACCtatcttgtggaaaggacgaaacaccggTAAAATCTACAACTTAGCCCGTTTAAGAGCTATGCTGGAAACAGCATAGCACTCGTTCCTTTCGA	107
RBP_lib_291	ACCGGCCAACATACCtatcttgtggaaaggacgaaacaccggGCATCGTAGGCACCGTATCCGTTTAAGAGCTATGCTGGAAACAGCATAGCACTCGTTCCTTTCGA	107
RBP_lib_292	ACCGGCCAACATACCtatcttgtggaaaggacgaaacaccggAGAGGAAGCAATCAAATGTGGTTTAAGAGCTATGCTGGAAACAGCATAGCACTCGTTCCTTTCGA	107
RBP_lib_293	ACCGGCCAACATACCtatcttgtggaaaggacgaaacaccggTGACAACAACGACCCTGGAGGTTTAAGAGCTATGCTGGAAACAGCATAGCACTCGTTCCTTTCGA	107
RBP_lib_294	ACCGGCCAACATACCtatcttgtggaaaggacgaaacaccggGTACTTGTCATCGAAGACCCGTTTAAGAGCTATGCTGGAAACAGCATAGCACTCGTTCCTTTCGA	107
RBP_lib_295	ACCGGCCAACATACCtatcttgtggaaaggacgaaacaccggTCACATTTGATTGCTTCCTCGTTTAAGAGCTATGCTGGAAACAGCATAGCACTCGTTCCTTTCGA	107
RBP_lib_296	ACCGGCCAACATACCtatcttgtggaaaggacgaaacaccggCAGGCCTTCTGTCCTCTCCAGTTTAAGAGCTATGCTGGAAACAGCATAGCACTCGTTCCTTTCGA	107
RBP_lib_297	ACCGGCCAACATACCtatcttgtggaaaggacgaaacaccggTACGGTGGTGCCGTCTGCCAGTTTAAGAGCTATGCTGGAAACAGCATAGCACTCGTTCCTTTCGA	107
RBP_lib_298	ACCGGCCAACATACCtatcttgtggaaaggacgaaacaccggGACTCAACGAAAGACTCCAAGTTTAAGAGCTATGCTGGAAACAGCATAGCACTCGTTCCTTTCGA	107
RBP_lib_299	ACCGGCCAACATACCtatcttgtggaaaggacgaaacaccggTCTGTCGGATTTCCCCAAATGTTTAAGAGCTATGCTGGAAACAGCATAGCACTCGTTCCTTTCGA	107
RBP_lib_300	ACCGGCCAACATACCtatcttgtggaaaggacgaaacaccggCGCGCTTCAGCTGCTTGCATGTTTAAGAGCTATGCTGGAAACAGCATAGCACTCGTTCCTTTCGA	107
RBP_lib_301	ACCGGCCAACATACCtatcttgtggaaaggacgaaacaccggCAGCTGAAGCGCGCGGCCCTGTTTAAGAGCTATGCTGGAAACAGCATAGCACTCGTTCCTTTCGA	107
RBP_lib_302	ACCGGCCAACATACCtatcttgtggaaaggacgaaacaccggTGACAAGGATCACTACAAGTGTTTAAGAGCTATGCTGGAAACAGCATAGCACTCGTTCCTTTCGA	107
RBP_lib_303	ACCGGCCAACATACCtatcttgtggaaaggacgaaacaccggTGGAGTCTTTCGTTGAGTCTGTTTAAGAGCTATGCTGGAAACAGCATAGCACTCGTTCCTTTCGA	107
RBP_lib_304	ACCGGCCAACATACCtatcttgtggaaaggacgaaacaccggTCAAGTCAGCATAAAACGGAGTTTAAGAGCTATGCTGGAAACAGCATAGCACTCGTTCCTTTCGA	107
RBP_lib_305	ACCGGCCAACATACCtatcttgtggaaaggacgaaacaccggCGGACTCGTCGTTGCCACCAGTTTAAGAGCTATGCTGGAAACAGCATAGCACTCGTTCCTTTCGA	107
RBP_lib_306	ACCGGCCAACATACCtatcttgtggaaaggacgaaacaccggCCGGACTCGTCGTTGCCACCGTTTAAGAGCTATGCTGGAAACAGCATAGCACTCGTTCCTTTCGA	107
RBP_lib_307	ACCGGCCAACATACCtatcttgtggaaaggacgaaacaccggCCTGGTGGCAACGACGAGTCGTTTAAGAGCTATGCTGGAAACAGCATAGCACTCGTTCCTTTCGA	107
RBP_lib_308	ACCGGCCAACATACCtatcttgtggaaaggacgaaacaccggTCGTCGTTGCCACCAGGGGCGTTTAAGAGCTATGCTGGAAACAGCATAGCACTCGTTCCTTTCGA	107
RBP_lib_309	ACCGGCCAACATACCtatcttgtggaaaggacgaaacaccggGGACTCGTCGTTGCCACCAGGTTTAAGAGCTATGCTGGAAACAGCATAGCACTCGTTCCTTTCGA	107
RBP_lib_310	ACCGGCCAACATACCtatcttgtggaaaggacgaaacaccggTGGGGTCGCCCCTGTTGGTAGTTTAAGAGCTATGCTGGAAACAGCATAGCACTCGTTCCTTTCGA	107
RBP_lib_311	ACCGGCCAACATACCtatcttgtggaaaggacgaaacaccggGCCGGTGAAGCCTTACCAACGTTTAAGAGCTATGCTGGAAACAGCATAGCACTCGTTCCTTTCGA	107
RBP_lib_312	ACCGGCCAACATACCtatcttgtggaaaggacgaaacaccggCGGTGAAGCCTTACCAACAGGTTTAAGAGCTATGCTGGAAACAGCATAGCACTCGTTCCTTTCGA	107
RBP_lib_313	ACCGGCCAACATACCtatcttgtggaaaggacgaaacaccggAGAGGCGCCTCGGCACTTACGTTTAAGAGCTATGCTGGAAACAGCATAGCACTCGTTCCTTTCGA	107
RBP_lib_314	ACCGGCCAACATACCtatcttgtggaaaggacgaaacaccggGCTTATGGCGAGACTTATCGGTTTAAGAGCTATGCTGGAAACAGCATAGCACTCGTTCCTTTCGA	107
RBP_lib_315	ACCGGCCAACATACCtatcttgtggaaaggacgaaacaccggAGACTTATCGTGGCCGAAGTGTTTAAGAGCTATGCTGGAAACAGCATAGCACTCGTTCCTTTCGA	107
RBP_lib_316	ACCGGCCAACATACCtatcttgtggaaaggacgaaacaccggCACGCTGCGCAGGCTGCAAGGTTTAAGAGCTATGCTGGAAACAGCATAGCACTCGTTCCTTTCGA	107
RBP_lib_317	ACCGGCCAACATACCtatcttgtggaaaggacgaaacaccggGTCTCGCCATAAGCATCTCGGTTTAAGAGCTATGCTGGAAACAGCATAGCACTCGTTCCTTTCGA	107
RBP_lib_318	ACCGGCCAACATACCtatcttgtggaaaggacgaaacaccggTCACAGACCAGTAAGTGCCGGTTTAAGAGCTATGCTGGAAACAGCATAGCACTCGTTCCTTTCGA	107
RBP_lib_319	ACCGGCCAACATACCtatcttgtggaaaggacgaaacaccggGACGCACTATCATAATTACAGTTTAAGAGCTATGCTGGAAACAGCATAGCACTCGTTCCTTTCGA	107
RBP_lib_320	ACCGGCCAACATACCtatcttgtggaaaggacgaaacaccggGCGTCTCCACGAGATGCTTAGTTTAAGAGCTATGCTGGAAACAGCATAGCACTCGTTCCTTTCGA	107
RBP_lib_321	ACCGGCCAACATACCtatcttgtggaaaggacgaaacaccggCGCACTGCTTGTACGGAGCGGTTTAAGAGCTATGCTGGAAACAGCATAGCACTCGTTCCTTTCGA	107
RBP_lib_322	ACCGGCCAACATACCtatcttgtggaaaggacgaaacaccggCACGCTCCGTACAAGCAGTGGTTTAAGAGCTATGCTGGAAACAGCATAGCACTCGTTCCTTTCGA	107
RBP_lib_323	ACCGGCCAACATACCtatcttgtggaaaggacgaaacaccggTGTACGGAGCGTGGTGGCTTGTTTAAGAGCTATGCTGGAAACAGCATAGCACTCGTTCCTTTCGA	107
RBP_lib_324	ACCGGCCAACATACCtatcttgtggaaaggacgaaacaccggACTGCTTGTACGGAGCGTGGGTTTAAGAGCTATGCTGGAAACAGCATAGCACTCGTTCCTTTCGA	107
RBP_lib_325	ACCGGCCAACATACCtatcttgtggaaaggacgaaacaccggGCTTCACCGCGAGGCGACTCGTTTAAGAGCTATGCTGGAAACAGCATAGCACTCGTTCCTTTCGA	107
RBP_lib_326	ACCGGCCAACATACCtatcttgtggaaaggacgaaacaccggACGGAGCGTGGTGGCTTCGGGTTTAAGAGCTATGCTGGAAACAGCATAGCACTCGTTCCTTTCGA	107
RBP_lib_327	ACCGGCCAACATACCtatcttgtggaaaggacgaaacaccggCCGCGAGGCGACTCAGGTGCGTTTAAGAGCTATGCTGGAAACAGCATAGCACTCGTTCCTTTCGA	107
RBP_lib_328	ACCGGCCAACATACCtatcttgtggaaaggacgaaacaccggAGACTCGGGGCTTCACCGCGGTTTAAGAGCTATGCTGGAAACAGCATAGCACTCGTTCCTTTCGA	107
RBP_lib_329	ACCGGCCAACATACCtatcttgtggaaaggacgaaacaccggTCCAGGAGCCGCCCACTAATGTTTAAGAGCTATGCTGGAAACAGCATAGCACTCGTTCCTTTCGA	107
RBP_lib_330	ACCGGCCAACATACCtatcttgtggaaaggacgaaacaccggATCCAGGAGCCGCCCACTAAGTTTAAGAGCTATGCTGGAAACAGCATAGCACTCGTTCCTTTCGA	107
RBP_lib_331	ACCGGCCAACATACCtatcttgtggaaaggacgaaacaccggGGAGCCGCCCACTAATGGGAGTTTAAGAGCTATGCTGGAAACAGCATAGCACTCGTTCCTTTCGA	107
RBP_lib_332	ACCGGCCAACATACCtatcttgtggaaaggacgaaacaccggGTCCAAGGTGGAGATCCCACGTTTAAGAGCTATGCTGGAAACAGCATAGCACTCGTTCCTTTCGA	107
RBP_lib_333	ACCGGCCAACATACCtatcttgtggaaaggacgaaacaccggGAGATATTGACATAGAGTTGGTTTAAGAGCTATGCTGGAAACAGCATAGCACTCGTTCCTTTCGA	107
RBP_lib_334	ACCGGCCAACATACCtatcttgtggaaaggacgaaacaccggCCACCTTGGACTATAAAGCCGTTTAAGAGCTATGCTGGAAACAGCATAGCACTCGTTCCTTTCGA	107
RBP_lib_335	ACCGGCCAACATACCtatcttgtggaaaggacgaaacaccggGTACCTGGCTTTATAGTCCAGTTTAAGAGCTATGCTGGAAACAGCATAGCACTCGTTCCTTTCGA	107
RBP_lib_336	ACCGGCCAACATACCtatcttgtggaaaggacgaaacaccggACTGGTGGAGAATCTATCTAGTTTAAGAGCTATGCTGGAAACAGCATAGCACTCGTTCCTTTCGA	107
RBP_lib_337	ACCGGCCAACATACCtatcttgtggaaaggacgaaacaccggGATAATCAGACTCGAAGCAGGTTTAAGAGCTATGCTGGAAACAGCATAGCACTCGTTCCTTTCGA	107
RBP_lib_338	ACCGGCCAACATACCtatcttgtggaaaggacgaaacaccggATCAGGCCCGTTCAGAAGAGGTTTAAGAGCTATGCTGGAAACAGCATAGCACTCGTTCCTTTCGA	107
RBP_lib_339	ACCGGCCAACATACCtatcttgtggaaaggacgaaacaccggTCAGGCCCGTTCAGAAGAGGGTTTAAGAGCTATGCTGGAAACAGCATAGCACTCGTTCCTTTCGA	107
RBP_lib_340	ACCGGCCAACATACCtatcttgtggaaaggacgaaacaccggGAGATGATTTCATGAGAAGTGTTTAAGAGCTATGCTGGAAACAGCATAGCACTCGTTCCTTTCGA	107
RBP_lib_341	ACCGGCCAACATACCtatcttgtggaaaggacgaaacaccggGAGAACACATCTACAACTGGGTTTAAGAGCTATGCTGGAAACAGCATAGCACTCGTTCCTTTCGA	107
RBP_lib_342	ACCGGCCAACATACCtatcttgtggaaaggacgaaacaccggGCATCAGGCCCGTTCAGAAGGTTTAAGAGCTATGCTGGAAACAGCATAGCACTCGTTCCTTTCGA	107
RBP_lib_343	ACCGGCCAACATACCtatcttgtggaaaggacgaaacaccggATAATCAGACTCGAAGCAGAGTTTAAGAGCTATGCTGGAAACAGCATAGCACTCGTTCCTTTCGA	107
RBP_lib_344	ACCGGCCAACATACCtatcttgtggaaaggacgaaacaccggACAACTGGTGGCTTTGGAAGGTTTAAGAGCTATGCTGGAAACAGCATAGCACTCGTTCCTTTCGA	107
RBP_lib_345	ACCGGCCAACATACCtatcttgtggaaaggacgaaacaccggGTTACTCCACGCGGTGTTTCGTTTAAGAGCTATGCTGGAAACAGCATAGCACTCGTTCCTTTCGA	107
RBP_lib_346	ACCGGCCAACATACCtatcttgtggaaaggacgaaacaccggTTACTCCACGCGGTGTTTCTGTTTAAGAGCTATGCTGGAAACAGCATAGCACTCGTTCCTTTCGA	107
RBP_lib_347	ACCGGCCAACATACCtatcttgtggaaaggacgaaacaccggTGGATCCCAGAAACACCGCGGTTTAAGAGCTATGCTGGAAACAGCATAGCACTCGTTCCTTTCGA	107
RBP_lib_348	ACCGGCCAACATACCtatcttgtggaaaggacgaaacaccggGGAATCATCGTTACTCCACGGTTTAAGAGCTATGCTGGAAACAGCATAGCACTCGTTCCTTTCGA	107
RBP_lib_349	ACCGGCCAACATACCtatcttgtggaaaggacgaaacaccggAGTAACGATGATTCCAAGTTGTTTAAGAGCTATGCTGGAAACAGCATAGCACTCGTTCCTTTCGA	107
RBP_lib_350	ACCGGCCAACATACCtatcttgtggaaaggacgaaacaccggGCGGAAGCAGAAATGGACTGGTTTAAGAGCTATGCTGGAAACAGCATAGCACTCGTTCCTTTCGA	107
RBP_lib_351	ACCGGCCAACATACCtatcttgtggaaaggacgaaacaccggGATGGGGTGGTCTAAAGGAAGTTTAAGAGCTATGCTGGAAACAGCATAGCACTCGTTCCTTTCGA	107
RBP_lib_352	ACCGGCCAACATACCtatcttgtggaaaggacgaaacaccggCTCTCGGAGTGAAACCGACCGTTTAAGAGCTATGCTGGAAACAGCATAGCACTCGTTCCTTTCGA	107
RBP_lib_353	ACCGGCCAACATACCtatcttgtggaaaggacgaaacaccggGTTCCACAGTCCGCCCCCGCGTTTAAGAGCTATGCTGGAAACAGCATAGCACTCGTTCCTTTCGA	107
RBP_lib_354	ACCGGCCAACATACCtatcttgtggaaaggacgaaacaccggTCGACTCAACAACTCCATCTGTTTAAGAGCTATGCTGGAAACAGCATAGCACTCGTTCCTTTCGA	107
RBP_lib_355	ACCGGCCAACATACCtatcttgtggaaaggacgaaacaccggGCGGGGGCGGACTGTGGAACGTTTAAGAGCTATGCTGGAAACAGCATAGCACTCGTTCCTTTCGA	107
RBP_lib_356	ACCGGCCAACATACCtatcttgtggaaaggacgaaacaccggCACCAGCATCGCAGACCTCAGTTTAAGAGCTATGCTGGAAACAGCATAGCACTCGTTCCTTTCGA	107
RBP_lib_357	ACCGGCCAACATACCtatcttgtggaaaggacgaaacaccggTCAGAGCCGAGCCCCTCCGGGTTTAAGAGCTATGCTGGAAACAGCATAGCACTCGTTCCTTTCGA	107
RBP_lib_358	ACCGGCCAACATACCtatcttgtggaaaggacgaaacaccggGGACGTTATTTGTATACCGAGTTTAAGAGCTATGCTGGAAACAGCATAGCACTCGTTCCTTTCGA	107
RBP_lib_359	ACCGGCCAACATACCtatcttgtggaaaggacgaaacaccggGTTTGTCAATATACAGTATCGTTTAAGAGCTATGCTGGAAACAGCATAGCACTCGTTCCTTTCGA	107
RBP_lib_360	ACCGGCCAACATACCtatcttgtggaaaggacgaaacaccggTCTGCCCCAAAGCCAACCAGGTTTAAGAGCTATGCTGGAAACAGCATAGCACTCGTTCCTTTCGA	107
RBP_lib_361	ACCGGCCAACATACCtatcttgtggaaaggacgaaacaccggGGTAGAAAATTTGTCACCTGGTTTAAGAGCTATGCTGGAAACAGCATAGCACTCGTTCCTTTCGA	107
RBP_lib_362	ACCGGCCAACATACCtatcttgtggaaaggacgaaacaccggTAAACTGCTCTATTCATGTGGTTTAAGAGCTATGCTGGAAACAGCATAGCACTCGTTCCTTTCGA	107
RBP_lib_363	ACCGGCCAACATACCtatcttgtggaaaggacgaaacaccggTGGTAGAAAATTTGTCACCTGTTTAAGAGCTATGCTGGAAACAGCATAGCACTCGTTCCTTTCGA	107
RBP_lib_364	ACCGGCCAACATACCtatcttgtggaaaggacgaaacaccggGGTGCTTGTCGTAGGCTTCCGTTTAAGAGCTATGCTGGAAACAGCATAGCACTCGTTCCTTTCGA	107
RBP_lib_365	ACCGGCCAACATACCtatcttgtggaaaggacgaaacaccggAGCCCCCAATCTGACACAGGGTTTAAGAGCTATGCTGGAAACAGCATAGCACTCGTTCCTTTCGA	107
RBP_lib_366	ACCGGCCAACATACCtatcttgtggaaaggacgaaacaccggTCAGCCTCCTGTGTCAGATTGTTTAAGAGCTATGCTGGAAACAGCATAGCACTCGTTCCTTTCGA	107
RBP_lib_367	ACCGGCCAACATACCtatcttgtggaaaggacgaaacaccggAGCCTCCTGTGTCAGATTGGGTTTAAGAGCTATGCTGGAAACAGCATAGCACTCGTTCCTTTCGA	107
RBP_lib_368	ACCGGCCAACATACCtatcttgtggaaaggacgaaacaccggTCCGCACCGAGCTCCTGCCAGTTTAAGAGCTATGCTGGAAACAGCATAGCACTCGTTCCTTTCGA	107
RBP_lib_369	ACCGGCCAACATACCtatcttgtggaaaggacgaaacaccggGCCGAGACTATTATGACAGAGTTTAAGAGCTATGCTGGAAACAGCATAGCACTCGTTCCTTTCGA	107
RBP_lib_370	ACCGGCCAACATACCtatcttgtggaaaggacgaaacaccggGCGGCGAGAACTGCCATAAGGTTTAAGAGCTATGCTGGAAACAGCATAGCACTCGTTCCTTTCGA	107
RBP_lib_371	ACCGGCCAACATACCtatcttgtggaaaggacgaaacaccggACGATCGGGGTTATGATGACGTTTAAGAGCTATGCTGGAAACAGCATAGCACTCGTTCCTTTCGA	107
RBP_lib_372	ACCGGCCAACATACCtatcttgtggaaaggacgaaacaccggCGATCGGGGTTATGATGACCGTTTAAGAGCTATGCTGGAAACAGCATAGCACTCGTTCCTTTCGA	107
RBP_lib_373	ACCGGCCAACATACCtatcttgtggaaaggacgaaacaccggCGCCGTCAACGCCTTCAACCGTTTAAGAGCTATGCTGGAAACAGCATAGCACTCGTTCCTTTCGA	107
RBP_lib_374	ACCGGCCAACATACCtatcttgtggaaaggacgaaacaccggGAGTCGATGACATACAGGCCGTTTAAGAGCTATGCTGGAAACAGCATAGCACTCGTTCCTTTCGA	107
RBP_lib_375	ACCGGCCAACATACCtatcttgtggaaaggacgaaacaccggCGATGGAGTCGATGACATACGTTTAAGAGCTATGCTGGAAACAGCATAGCACTCGTTCCTTTCGA	107
RBP_lib_376	ACCGGCCAACATACCtatcttgtggaaaggacgaaacaccggTAGTTCGTGTGCTAAATCTTGTTTAAGAGCTATGCTGGAAACAGCATAGCACTCGTTCCTTTCGA	107
RBP_lib_377	ACCGGCCAACATACCtatcttgtggaaaggacgaaacaccggATCTTGGCTCTAGAGATGGGGTTTAAGAGCTATGCTGGAAACAGCATAGCACTCGTTCCTTTCGA	107
RBP_lib_378	ACCGGCCAACATACCtatcttgtggaaaggacgaaacaccggCGCCCTTGACAGTGCTGTGAGTTTAAGAGCTATGCTGGAAACAGCATAGCACTCGTTCCTTTCGA	107
RBP_lib_379	ACCGGCCAACATACCtatcttgtggaaaggacgaaacaccggAGGCCTGGAACCTTATATTCGTTTAAGAGCTATGCTGGAAACAGCATAGCACTCGTTCCTTTCGA	107
RBP_lib_380	ACCGGCCAACATACCtatcttgtggaaaggacgaaacaccggAGACAGTCTCGGCACCAGTTGTTTAAGAGCTATGCTGGAAACAGCATAGCACTCGTTCCTTTCGA	107
RBP_lib_381	ACCGGCCAACATACCtatcttgtggaaaggacgaaacaccggGGCCACGTTAGCAAACGGACGTTTAAGAGCTATGCTGGAAACAGCATAGCACTCGTTCCTTTCGA	107
RBP_lib_382	ACCGGCCAACATACCtatcttgtggaaaggacgaaacaccggGAATGGTCGACGGGTTCCCCGTTTAAGAGCTATGCTGGAAACAGCATAGCACTCGTTCCTTTCGA	107
RBP_lib_383	ACCGGCCAACATACCtatcttgtggaaaggacgaaacaccggAACGCGAGCCTCAGTACCAAGTTTAAGAGCTATGCTGGAAACAGCATAGCACTCGTTCCTTTCGA	107
RBP_lib_384	ACCGGCCAACATACCtatcttgtggaaaggacgaaacaccggACGCGAGCCTCAGTACCAACGTTTAAGAGCTATGCTGGAAACAGCATAGCACTCGTTCCTTTCGA	107
RBP_lib_385	ACCGGCCAACATACCtatcttgtggaaaggacgaaacaccggTCGACGGGTTCCCCGGGCTGGTTTAAGAGCTATGCTGGAAACAGCATAGCACTCGTTCCTTTCGA	107
RBP_lib_386	ACCGGCCAACATACCtatcttgtggaaaggacgaaacaccggGGAATGGTCGACGGGTTCCCGTTTAAGAGCTATGCTGGAAACAGCATAGCACTCGTTCCTTTCGA	107
RBP_lib_387	ACCGGCCAACATACCtatcttgtggaaaggacgaaacaccggGCTTAATCCGTTCATATGCCGTTTAAGAGCTATGCTGGAAACAGCATAGCACTCGTTCCTTTCGA	107
RBP_lib_388	ACCGGCCAACATACCtatcttgtggaaaggacgaaacaccggAGCCTGTCCGTTTGCTAACGGTTTAAGAGCTATGCTGGAAACAGCATAGCACTCGTTCCTTTCGA	107
RBP_lib_389	ACCGGCCAACATACCtatcttgtggaaaggacgaaacaccggGTAAATCGCGTCCGCGCCTCGTTTAAGAGCTATGCTGGAAACAGCATAGCACTCGTTCCTTTCGA	107
RBP_lib_390	ACCGGCCAACATACCtatcttgtggaaaggacgaaacaccggAAACTGAAAAGCGCCGGCGTGTTTAAGAGCTATGCTGGAAACAGCATAGCACTCGTTCCTTTCGA	107
RBP_lib_391	ACCGGCCAACATACCtatcttgtggaaaggacgaaacaccggTCCGGCAAACTGAAAAGCGCGTTTAAGAGCTATGCTGGAAACAGCATAGCACTCGTTCCTTTCGA	107
RBP_lib_392	ACCGGCCAACATACCtatcttgtggaaaggacgaaacaccggAGCTAAAACGTTCTCACATGGTTTAAGAGCTATGCTGGAAACAGCATAGCACTCGTTCCTTTCGA	107
RBP_lib_393	ACCGGCCAACATACCtatcttgtggaaaggacgaaacaccggTTTGTTATTCAAGGCTTCTCGTTTAAGAGCTATGCTGGAAACAGCATAGCACTCGTTCCTTTCGA	107
RBP_lib_394	ACCGGCCAACATACCtatcttgtggaaaggacgaaacaccggTCCCAATAGCACAAATGGTGGTTTAAGAGCTATGCTGGAAACAGCATAGCACTCGTTCCTTTCGA	107
RBP_lib_395	ACCGGCCAACATACCtatcttgtggaaaggacgaaacaccggTTTGCAGAGTCAGTTTAACCGTTTAAGAGCTATGCTGGAAACAGCATAGCACTCGTTCCTTTCGA	107
RBP_lib_396	ACCGGCCAACATACCtatcttgtggaaaggacgaaacaccggACATCTCCCAATAGCACAAAGTTTAAGAGCTATGCTGGAAACAGCATAGCACTCGTTCCTTTCGA	107
RBP_lib_397	ACCGGCCAACATACCtatcttgtggaaaggacgaaacaccggCCGAGTGGCCCGGCTTAGCTGTTTAAGAGCTATGCTGGAAACAGCATAGCACTCGTTCCTTTCGA	107
RBP_lib_398	ACCGGCCAACATACCtatcttgtggaaaggacgaaacaccggTCGGACCCTCAAGAAGCCCGGTTTAAGAGCTATGCTGGAAACAGCATAGCACTCGTTCCTTTCGA	107
RBP_lib_399	ACCGGCCAACATACCtatcttgtggaaaggacgaaacaccggGGGCTTCTTGAGGGTCCGAGGTTTAAGAGCTATGCTGGAAACAGCATAGCACTCGTTCCTTTCGA	107
RBP_lib_400	ACCGGCCAACATACCtatcttgtggaaaggacgaaacaccggGCCGGCCTCGGGCTTCTTGAGTTTAAGAGCTATGCTGGAAACAGCATAGCACTCGTTCCTTTCGA	107
RBP_lib_401	ACCGGCCAACATACCtatcttgtggaaaggacgaaacaccggGATGGACCGGATCACGCCGCGTTTAAGAGCTATGCTGGAAACAGCATAGCACTCGTTCCTTTCGA	107
RBP_lib_402	ACCGGCCAACATACCtatcttgtggaaaggacgaaacaccggATCCGGTCCATCGTGCGAGCGTTTAAGAGCTATGCTGGAAACAGCATAGCACTCGTTCCTTTCGA	107
RBP_lib_403	ACCGGCCAACATACCtatcttgtggaaaggacgaaacaccggGGCCTGCTCGCACGATGGACGTTTAAGAGCTATGCTGGAAACAGCATAGCACTCGTTCCTTTCGA	107
RBP_lib_404	ACCGGCCAACATACCtatcttgtggaaaggacgaaacaccggCGCCGGCCTCGGGCTTCTTGGTTTAAGAGCTATGCTGGAAACAGCATAGCACTCGTTCCTTTCGA	107
RBP_lib_405	ACCGGCCAACATACCtatcttgtggaaaggacgaaacaccggGAGCTTGCGAGCGTCTCCGAGTTTAAGAGCTATGCTGGAAACAGCATAGCACTCGTTCCTTTCGA	107
RBP_lib_406	ACCGGCCAACATACCtatcttgtggaaaggacgaaacaccggAAAGGGCAGCTTCTACTTGCGTTTAAGAGCTATGCTGGAAACAGCATAGCACTCGTTCCTTTCGA	107
RBP_lib_407	ACCGGCCAACATACCtatcttgtggaaaggacgaaacaccggCCTTCTGTCAACTCAGCCTTGTTTAAGAGCTATGCTGGAAACAGCATAGCACTCGTTCCTTTCGA	107
RBP_lib_408	ACCGGCCAACATACCtatcttgtggaaaggacgaaacaccggCCGAAGGCTGAGTTGACAGAGTTTAAGAGCTATGCTGGAAACAGCATAGCACTCGTTCCTTTCGA	107
RBP_lib_409	ACCGGCCAACATACCtatcttgtggaaaggacgaaacaccggAGACGGACAGTGTTACGAAGGTTTAAGAGCTATGCTGGAAACAGCATAGCACTCGTTCCTTTCGA	107
RBP_lib_410	ACCGGCCAACATACCtatcttgtggaaaggacgaaacaccggCAAGTAGAAGCTGCCCTTTCGTTTAAGAGCTATGCTGGAAACAGCATAGCACTCGTTCCTTTCGA	107
RBP_lib_411	ACCGGCCAACATACCtatcttgtggaaaggacgaaacaccggGGGACAAGTGCATGGCCGTGGTTTAAGAGCTATGCTGGAAACAGCATAGCACTCGTTCCTTTCGA	107
RBP_lib_412	ACCGGCCAACATACCtatcttgtggaaaggacgaaacaccggATGGCCGTGTGGAGTGAAGAGTTTAAGAGCTATGCTGGAAACAGCATAGCACTCGTTCCTTTCGA	107
RBP_lib_413	ACCGGCCAACATACCtatcttgtggaaaggacgaaacaccggTGGCGGGTGAGGACCACCCGGTTTAAGAGCTATGCTGGAAACAGCATAGCACTCGTTCCTTTCGA	107
RBP_lib_414	ACCGGCCAACATACCtatcttgtggaaaggacgaaacaccggGGGTGAGGACCACCCGTGGCGTTTAAGAGCTATGCTGGAAACAGCATAGCACTCGTTCCTTTCGA	107
RBP_lib_415	ACCGGCCAACATACCtatcttgtggaaaggacgaaacaccggCGCTCATCAGTAGATTGTAGGTTTAAGAGCTATGCTGGAAACAGCATAGCACTCGTTCCTTTCGA	107
RBP_lib_416	ACCGGCCAACATACCtatcttgtggaaaggacgaaacaccggCGCGTCTCAGGAAGAGCGAGGTTTAAGAGCTATGCTGGAAACAGCATAGCACTCGTTCCTTTCGA	107
RBP_lib_417	ACCGGCCAACATACCtatcttgtggaaaggacgaaacaccggGGATGCTGCCCTGCCACGGGGTTTAAGAGCTATGCTGGAAACAGCATAGCACTCGTTCCTTTCGA	107
RBP_lib_418	ACCGGCCAACATACCtatcttgtggaaaggacgaaacaccggAAGAGCGAGAGGTGCGCTTGGTTTAAGAGCTATGCTGGAAACAGCATAGCACTCGTTCCTTTCGA	107
RBP_lib_419	ACCGGCCAACATACCtatcttgtggaaaggacgaaacaccggGAGAATCACCCGCGCCAGGGGTTTAAGAGCTATGCTGGAAACAGCATAGCACTCGTTCCTTTCGA	107
RBP_lib_420	ACCGGCCAACATACCtatcttgtggaaaggacgaaacaccggGAATCGTGCCCTCGGCGCCTGTTTAAGAGCTATGCTGGAAACAGCATAGCACTCGTTCCTTTCGA	107
RBP_lib_421	ACCGGCCAACATACCtatcttgtggaaaggacgaaacaccggTGGCGGCGCACCTGAAAAAGGTTTAAGAGCTATGCTGGAAACAGCATAGCACTCGTTCCTTTCGA	107
RBP_lib_422	ACCGGCCAACATACCtatcttgtggaaaggacgaaacaccggGGCGGCGCACCTGAAAAAGCGTTTAAGAGCTATGCTGGAAACAGCATAGCACTCGTTCCTTTCGA	107
RBP_lib_423	ACCGGCCAACATACCtatcttgtggaaaggacgaaacaccggGTATGAGGAGTTCACTAAAGGTTTAAGAGCTATGCTGGAAACAGCATAGCACTCGTTCCTTTCGA	107
RBP_lib_424	ACCGGCCAACATACCtatcttgtggaaaggacgaaacaccggGCGTCGTCCATTATGCAGTCGTTTAAGAGCTATGCTGGAAACAGCATAGCACTCGTTCCTTTCGA	107
RBP_lib_425	ACCGGCCAACATACCtatcttgtggaaaggacgaaacaccggAGCTACCCAAGTGCGATTAGGTTTAAGAGCTATGCTGGAAACAGCATAGCACTCGTTCCTTTCGA	107
RBP_lib_426	ACCGGCCAACATACCtatcttgtggaaaggacgaaacaccggCCAAGTGCGATTAGTGGATGGTTTAAGAGCTATGCTGGAAACAGCATAGCACTCGTTCCTTTCGA	107
RBP_lib_427	ACCGGCCAACATACCtatcttgtggaaaggacgaaacaccggGGATTATTATCAAAGACGGCGTTTAAGAGCTATGCTGGAAACAGCATAGCACTCGTTCCTTTCGA	107
RBP_lib_428	ACCGGCCAACATACCtatcttgtggaaaggacgaaacaccggTGGAGAGCGGCAGATTTGCTGTTTAAGAGCTATGCTGGAAACAGCATAGCACTCGTTCCTTTCGA	107
RBP_lib_429	ACCGGCCAACATACCtatcttgtggaaaggacgaaacaccggCAGCGATAGTACTGGGCGTAGTTTAAGAGCTATGCTGGAAACAGCATAGCACTCGTTCCTTTCGA	107
RBP_lib_430	ACCGGCCAACATACCtatcttgtggaaaggacgaaacaccggCCTACGCCCAGTACTATCGCGTTTAAGAGCTATGCTGGAAACAGCATAGCACTCGTTCCTTTCGA	107
RBP_lib_431	ACCGGCCAACATACCtatcttgtggaaaggacgaaacaccggAGTTGAGCCAGCGATAGTACGTTTAAGAGCTATGCTGGAAACAGCATAGCACTCGTTCCTTTCGA	107
RBP_lib_432	ACCGGCCAACATACCtatcttgtggaaaggacgaaacaccggTACTCAAGCTTTATTACCGAGTTTAAGAGCTATGCTGGAAACAGCATAGCACTCGTTCCTTTCGA	107
RBP_lib_433	ACCGGCCAACATACCtatcttgtggaaaggacgaaacaccggTATCGCTGGCTCAACTATGGGTTTAAGAGCTATGCTGGAAACAGCATAGCACTCGTTCCTTTCGA	107
RBP_lib_434	ACCGGCCAACATACCtatcttgtggaaaggacgaaacaccggCCAGCGATAGTACTGGGCGTGTTTAAGAGCTATGCTGGAAACAGCATAGCACTCGTTCCTTTCGA	107
RBP_lib_435	ACCGGCCAACATACCtatcttgtggaaaggacgaaacaccggGGCAGCTCCGCAGGATCAAAGTTTAAGAGCTATGCTGGAAACAGCATAGCACTCGTTCCTTTCGA	107
RBP_lib_436	ACCGGCCAACATACCtatcttgtggaaaggacgaaacaccggTAATAAAGCTTGAGTAGCTCGTTTAAGAGCTATGCTGGAAACAGCATAGCACTCGTTCCTTTCGA	107
RBP_lib_437	ACCGGCCAACATACCtatcttgtggaaaggacgaaacaccggCAGAACAGGGCTTTAGTGGAGTTTAAGAGCTATGCTGGAAACAGCATAGCACTCGTTCCTTTCGA	107
RBP_lib_438	ACCGGCCAACATACCtatcttgtggaaaggacgaaacaccggTGATCAGAACAGGGCTTTAGGTTTAAGAGCTATGCTGGAAACAGCATAGCACTCGTTCCTTTCGA	107
RBP_lib_439	ACCGGCCAACATACCtatcttgtggaaaggacgaaacaccggACTTCTGGCGGGCACTGTGTGTTTAAGAGCTATGCTGGAAACAGCATAGCACTCGTTCCTTTCGA	107
RBP_lib_440	ACCGGCCAACATACCtatcttgtggaaaggacgaaacaccggGGGCACTGTGTGGGAACTTGGTTTAAGAGCTATGCTGGAAACAGCATAGCACTCGTTCCTTTCGA	107
RBP_lib_441	ACCGGCCAACATACCtatcttgtggaaaggacgaaacaccggGGCCAAAGCTGCCATTGCGGGTTTAAGAGCTATGCTGGAAACAGCATAGCACTCGTTCCTTTCGA	107
RBP_lib_442	ACCGGCCAACATACCtatcttgtggaaaggacgaaacaccggTACTTCTGGCGGGCACTGTGGTTTAAGAGCTATGCTGGAAACAGCATAGCACTCGTTCCTTTCGA	107
RBP_lib_443	ACCGGCCAACATACCtatcttgtggaaaggacgaaacaccggCATCTTGGCTTTCCTTTCTCGTTTAAGAGCTATGCTGGAAACAGCATAGCACTCGTTCCTTTCGA	107
RBP_lib_444	ACCGGCCAACATACCtatcttgtggaaaggacgaaacaccggTTCTCCCAAAAAAGCAGCTGGTTTAAGAGCTATGCTGGAAACAGCATAGCACTCGTTCCTTTCGA	107
RBP_lib_445	ACCGGCCAACATACCtatcttgtggaaaggacgaaacaccggCCATCGAGCCGGGGCCGCTCGTTTAAGAGCTATGCTGGAAACAGCATAGCACTCGTTCCTTTCGA	107
RBP_lib_446	ACCGGCCAACATACCtatcttgtggaaaggacgaaacaccggCCAGAGCGGCCCCGGCTCGAGTTTAAGAGCTATGCTGGAAACAGCATAGCACTCGTTCCTTTCGA	107
RBP_lib_447	ACCGGCCAACATACCtatcttgtggaaaggacgaaacaccggGCCCGTCTCGTTACGTGCTCGTTTAAGAGCTATGCTGGAAACAGCATAGCACTCGTTCCTTTCGA	107
RBP_lib_448	ACCGGCCAACATACCtatcttgtggaaaggacgaaacaccggGGCCCGTCTCGTTACGTGCTGTTTAAGAGCTATGCTGGAAACAGCATAGCACTCGTTCCTTTCGA	107
RBP_lib_449	ACCGGCCAACATACCtatcttgtggaaaggacgaaacaccggACCAGGGCGCCATCGAGCCGGTTTAAGAGCTATGCTGGAAACAGCATAGCACTCGTTCCTTTCGA	107
RBP_lib_450	ACCGGCCAACATACCtatcttgtggaaaggacgaaacaccggATCCCGAGCACGTAACGAGAGTTTAAGAGCTATGCTGGAAACAGCATAGCACTCGTTCCTTTCGA	107
RBP_lib_451	ACCGGCCAACATACCtatcttgtggaaaggacgaaacaccggTCCCGAGCACGTAACGAGACGTTTAAGAGCTATGCTGGAAACAGCATAGCACTCGTTCCTTTCGA	107
RBP_lib_452	ACCGGCCAACATACCtatcttgtggaaaggacgaaacaccggGGAATTCGCGCGTCTTGCTGGTTTAAGAGCTATGCTGGAAACAGCATAGCACTCGTTCCTTTCGA	107
RBP_lib_453	ACCGGCCAACATACCtatcttgtggaaaggacgaaacaccggTCGTCGGATGGTCCATAACAGTTTAAGAGCTATGCTGGAAACAGCATAGCACTCGTTCCTTTCGA	107
RBP_lib_454	ACCGGCCAACATACCtatcttgtggaaaggacgaaacaccggTAACGTACTGAATCGTCGGAGTTTAAGAGCTATGCTGGAAACAGCATAGCACTCGTTCCTTTCGA	107
RBP_lib_455	ACCGGCCAACATACCtatcttgtggaaaggacgaaacaccggGAAGTAACGTACTGAATCGTGTTTAAGAGCTATGCTGGAAACAGCATAGCACTCGTTCCTTTCGA	107
RBP_lib_456	ACCGGCCAACATACCtatcttgtggaaaggacgaaacaccggGCAAAGCACGTTCCTTGTTAGTTTAAGAGCTATGCTGGAAACAGCATAGCACTCGTTCCTTTCGA	107
RBP_lib_457	ACCGGCCAACATACCtatcttgtggaaaggacgaaacaccggTCTGGTCTGCAAGTTCCCAAGTTTAAGAGCTATGCTGGAAACAGCATAGCACTCGTTCCTTTCGA	107
RBP_lib_458	ACCGGCCAACATACCtatcttgtggaaaggacgaaacaccggGCTTTGAGGATAGATCCATTGTTTAAGAGCTATGCTGGAAACAGCATAGCACTCGTTCCTTTCGA	107
RBP_lib_459	ACCGGCCAACATACCtatcttgtggaaaggacgaaacaccggAGCTTTGAGGATAGATCCATGTTTAAGAGCTATGCTGGAAACAGCATAGCACTCGTTCCTTTCGA	107
RBP_lib_460	ACCGGCCAACATACCtatcttgtggaaaggacgaaacaccggCATCAAAAACATTTAGCCGAGTTTAAGAGCTATGCTGGAAACAGCATAGCACTCGTTCCTTTCGA	107
RBP_lib_461	ACCGGCCAACATACCtatcttgtggaaaggacgaaacaccggGGTCGCAGTCGAAACACTTGGTTTAAGAGCTATGCTGGAAACAGCATAGCACTCGTTCCTTTCGA	107
RBP_lib_462	ACCGGCCAACATACCtatcttgtggaaaggacgaaacaccggTCACGTAGGTGGGGCCGCGCGTTTAAGAGCTATGCTGGAAACAGCATAGCACTCGTTCCTTTCGA	107
RBP_lib_463	ACCGGCCAACATACCtatcttgtggaaaggacgaaacaccggACCGTCATGTTCACGTAGGTGTTTAAGAGCTATGCTGGAAACAGCATAGCACTCGTTCCTTTCGA	107
RBP_lib_464	ACCGGCCAACATACCtatcttgtggaaaggacgaaacaccggGCCGACCGTCATGTTCACGTGTTTAAGAGCTATGCTGGAAACAGCATAGCACTCGTTCCTTTCGA	107
RBP_lib_465	ACCGGCCAACATACCtatcttgtggaaaggacgaaacaccggGACCGTCATGTTCACGTAGGGTTTAAGAGCTATGCTGGAAACAGCATAGCACTCGTTCCTTTCGA	107
RBP_lib_466	ACCGGCCAACATACCtatcttgtggaaaggacgaaacaccggTCGAAACACTTGCGGTTGTGGTTTAAGAGCTATGCTGGAAACAGCATAGCACTCGTTCCTTTCGA	107
RBP_lib_467	ACCGGCCAACATACCtatcttgtggaaaggacgaaacaccggACCTACGTGAACATGACGGTGTTTAAGAGCTATGCTGGAAACAGCATAGCACTCGTTCCTTTCGA	107
RBP_lib_468	ACCGGCCAACATACCtatcttgtggaaaggacgaaacaccggCCGTCATGTTCACGTAGGTGGTTTAAGAGCTATGCTGGAAACAGCATAGCACTCGTTCCTTTCGA	107
RBP_lib_469	ACCGGCCAACATACCtatcttgtggaaaggacgaaacaccggCCCGTCGGTAGCCGGCTCCAGTTTAAGAGCTATGCTGGAAACAGCATAGCACTCGTTCCTTTCGA	107
RBP_lib_470	ACCGGCCAACATACCtatcttgtggaaaggacgaaacaccggAGCCGGCTACCGACGGGCTTGTTTAAGAGCTATGCTGGAAACAGCATAGCACTCGTTCCTTTCGA	107
RBP_lib_471	ACCGGCCAACATACCtatcttgtggaaaggacgaaacaccggGCCGGCTACCGACGGGCTTTGTTTAAGAGCTATGCTGGAAACAGCATAGCACTCGTTCCTTTCGA	107
RBP_lib_472	ACCGGCCAACATACCtatcttgtggaaaggacgaaacaccggGCCATGGAGCCGGCTACCGAGTTTAAGAGCTATGCTGGAAACAGCATAGCACTCGTTCCTTTCGA	107
RBP_lib_473	ACCGGCCAACATACCtatcttgtggaaaggacgaaacaccggTCGGTAGCCGGCTCCATGGCGTTTAAGAGCTATGCTGGAAACAGCATAGCACTCGTTCCTTTCGA	107
RBP_lib_474	ACCGGCCAACATACCtatcttgtggaaaggacgaaacaccggGTCGGTAGCCGGCTCCATGGGTTTAAGAGCTATGCTGGAAACAGCATAGCACTCGTTCCTTTCGA	107
RBP_lib_475	ACCGGCCAACATACCtatcttgtggaaaggacgaaacaccggGCCCAAAGCCCGTCGGTAGCGTTTAAGAGCTATGCTGGAAACAGCATAGCACTCGTTCCTTTCGA	107
RBP_lib_476	ACCGGCCAACATACCtatcttgtggaaaggacgaaacaccggCCATGGAGCCGGCTACCGACGTTTAAGAGCTATGCTGGAAACAGCATAGCACTCGTTCCTTTCGA	107
RBP_lib_477	ACCGGCCAACATACCtatcttgtggaaaggacgaaacaccggTACAAGAAGGACACCGATTAGTTTAAGAGCTATGCTGGAAACAGCATAGCACTCGTTCCTTTCGA	107
RBP_lib_478	ACCGGCCAACATACCtatcttgtggaaaggacgaaacaccggGAAGGACACCGATTATGGATGTTTAAGAGCTATGCTGGAAACAGCATAGCACTCGTTCCTTTCGA	107
RBP_lib_479	ACCGGCCAACATACCtatcttgtggaaaggacgaaacaccggCCGATTATGGATTGGCAACCGTTTAAGAGCTATGCTGGAAACAGCATAGCACTCGTTCCTTTCGA	107
RBP_lib_480	ACCGGCCAACATACCtatcttgtggaaaggacgaaacaccggAGGATGGATGCATTCTCCAGGTTTAAGAGCTATGCTGGAAACAGCATAGCACTCGTTCCTTTCGA	107
RBP_lib_481	ACCGGCCAACATACCtatcttgtggaaaggacgaaacaccggAAGGATGGATGCATTCTCCAGTTTAAGAGCTATGCTGGAAACAGCATAGCACTCGTTCCTTTCGA	107
RBP_lib_482	ACCGGCCAACATACCtatcttgtggaaaggacgaaacaccggCCAGGTTGCCAATCCATAATGTTTAAGAGCTATGCTGGAAACAGCATAGCACTCGTTCCTTTCGA	107
RBP_lib_483	ACCGGCCAACATACCtatcttgtggaaaggacgaaacaccggTAGAGAGCCCTCTGAAAGGAGTTTAAGAGCTATGCTGGAAACAGCATAGCACTCGTTCCTTTCGA	107
RBP_lib_484	ACCGGCCAACATACCtatcttgtggaaaggacgaaacaccggGACTTCCTCTTCCATAAGTCGTTTAAGAGCTATGCTGGAAACAGCATAGCACTCGTTCCTTTCGA	107
RBP_lib_485	ACCGGCCAACATACCtatcttgtggaaaggacgaaacaccggTTGCCGTATTCGTCTCAATAGTTTAAGAGCTATGCTGGAAACAGCATAGCACTCGTTCCTTTCGA	107
RBP_lib_486	ACCGGCCAACATACCtatcttgtggaaaggacgaaacaccggACGCTCTCCGAACAGCAAGTGTTTAAGAGCTATGCTGGAAACAGCATAGCACTCGTTCCTTTCGA	107
RBP_lib_487	ACCGGCCAACATACCtatcttgtggaaaggacgaaacaccggAACGCTCTCCGAACAGCAAGGTTTAAGAGCTATGCTGGAAACAGCATAGCACTCGTTCCTTTCGA	107
RBP_lib_488	ACCGGCCAACATACCtatcttgtggaaaggacgaaacaccggTGACCTTATTGAGACGAATAGTTTAAGAGCTATGCTGGAAACAGCATAGCACTCGTTCCTTTCGA	107
RBP_lib_489	ACCGGCCAACATACCtatcttgtggaaaggacgaaacaccggGCTGTGCGTTTAATGTACTTGTTTAAGAGCTATGCTGGAAACAGCATAGCACTCGTTCCTTTCGA	107
RBP_lib_490	ACCGGCCAACATACCtatcttgtggaaaggacgaaacaccggGTAAAGAGATGCTTCGTAGCGTTTAAGAGCTATGCTGGAAACAGCATAGCACTCGTTCCTTTCGA	107
RBP_lib_491	ACCGGCCAACATACCtatcttgtggaaaggacgaaacaccggTAACCAGTGCTTCGATTAGTGTTTAAGAGCTATGCTGGAAACAGCATAGCACTCGTTCCTTTCGA	107
RBP_lib_492	ACCGGCCAACATACCtatcttgtggaaaggacgaaacaccggTGCTTCGATTAGTGGGTGATGTTTAAGAGCTATGCTGGAAACAGCATAGCACTCGTTCCTTTCGA	107
RBP_lib_493	ACCGGCCAACATACCtatcttgtggaaaggacgaaacaccggATGCGCGGTCGCCTTTGTGTGTTTAAGAGCTATGCTGGAAACAGCATAGCACTCGTTCCTTTCGA	107
RBP_lib_494	ACCGGCCAACATACCtatcttgtggaaaggacgaaacaccggCCGCCGCTCGACCCACACAAGTTTAAGAGCTATGCTGGAAACAGCATAGCACTCGTTCCTTTCGA	107
RBP_lib_495	ACCGGCCAACATACCtatcttgtggaaaggacgaaacaccggTTGTGTGGGTCGAGCGGCGGGTTTAAGAGCTATGCTGGAAACAGCATAGCACTCGTTCCTTTCGA	107
RBP_lib_496	ACCGGCCAACATACCtatcttgtggaaaggacgaaacaccggCCTTTGTGTGGGTCGAGCGGGTTTAAGAGCTATGCTGGAAACAGCATAGCACTCGTTCCTTTCGA	107
RBP_lib_497	ACCGGCCAACATACCtatcttgtggaaaggacgaaacaccggAGGCCGTGTCGTGATCGACTGTTTAAGAGCTATGCTGGAAACAGCATAGCACTCGTTCCTTTCGA	107
RBP_lib_498	ACCGGCCAACATACCtatcttgtggaaaggacgaaacaccggGACTCGGATACGGAAGACAGGTTTAAGAGCTATGCTGGAAACAGCATAGCACTCGTTCCTTTCGA	107
RBP_lib_499	ACCGGCCAACATACCtatcttgtggaaaggacgaaacaccggGTGGCGGTCCCACTGGCAGGGTTTAAGAGCTATGCTGGAAACAGCATAGCACTCGTTCCTTTCGA	107
RBP_lib_500	ACCGGCCAACATACCtatcttgtggaaaggacgaaacaccggACTGCGCTTCCGTTTCGCCAGTTTAAGAGCTATGCTGGAAACAGCATAGCACTCGTTCCTTTCGA	107
RBP_lib_501	ACCGGCCAACATACCtatcttgtggaaaggacgaaacaccggGCTCGGGCCCGAAACCAGCAGTTTAAGAGCTATGCTGGAAACAGCATAGCACTCGTTCCTTTCGA	107
RBP_lib_502	ACCGGCCAACATACCtatcttgtggaaaggacgaaacaccggGGCCCGAAACCAGCATGGAAGTTTAAGAGCTATGCTGGAAACAGCATAGCACTCGTTCCTTTCGA	107
RBP_lib_503	ACCGGCCAACATACCtatcttgtggaaaggacgaaacaccggGTATAAGGGGCCACTGTTAGGTTTAAGAGCTATGCTGGAAACAGCATAGCACTCGTTCCTTTCGA	107
RBP_lib_504	ACCGGCCAACATACCtatcttgtggaaaggacgaaacaccggCTGGTTTCGGGCCCGAGCTCGTTTAAGAGCTATGCTGGAAACAGCATAGCACTCGTTCCTTTCGA	107
RBP_lib_505	ACCGGCCAACATACCtatcttgtggaaaggacgaaacaccggCAGAACGTCCCCTTCCATGCGTTTAAGAGCTATGCTGGAAACAGCATAGCACTCGTTCCTTTCGA	107
RBP_lib_506	ACCGGCCAACATACCtatcttgtggaaaggacgaaacaccggGGTTGCATAAGGACTTTATCGTTTAAGAGCTATGCTGGAAACAGCATAGCACTCGTTCCTTTCGA	107
RBP_lib_507	ACCGGCCAACATACCtatcttgtggaaaggacgaaacaccggCTTATACCCCAGCGCCTCCAGTTTAAGAGCTATGCTGGAAACAGCATAGCACTCGTTCCTTTCGA	107
RBP_lib_508	ACCGGCCAACATACCtatcttgtggaaaggacgaaacaccggCAGCATGGAAGGGGACGTTCGTTTAAGAGCTATGCTGGAAACAGCATAGCACTCGTTCCTTTCGA	107
RBP_lib_509	ACCGGCCAACATACCtatcttgtggaaaggacgaaacaccggGAAGTTAAGTACCGCGGCACGTTTAAGAGCTATGCTGGAAACAGCATAGCACTCGTTCCTTTCGA	107
RBP_lib_510	ACCGGCCAACATACCtatcttgtggaaaggacgaaacaccggGGTACTTAACTTCGCAGCCCGTTTAAGAGCTATGCTGGAAACAGCATAGCACTCGTTCCTTTCGA	107
RBP_lib_511	ACCGGCCAACATACCtatcttgtggaaaggacgaaacaccggGTACTTAACTTCGCAGCCCCGTTTAAGAGCTATGCTGGAAACAGCATAGCACTCGTTCCTTTCGA	107
RBP_lib_512	ACCGGCCAACATACCtatcttgtggaaaggacgaaacaccggGGCTGCGAAGTTAAGTACCGGTTTAAGAGCTATGCTGGAAACAGCATAGCACTCGTTCCTTTCGA	107
RBP_lib_513	ACCGGCCAACATACCtatcttgtggaaaggacgaaacaccggTCGCAGCGGGGTCGCTTAGCGTTTAAGAGCTATGCTGGAAACAGCATAGCACTCGTTCCTTTCGA	107
RBP_lib_514	ACCGGCCAACATACCtatcttgtggaaaggacgaaacaccggGCTAAGCGACCCCGCTGCGAGTTTAAGAGCTATGCTGGAAACAGCATAGCACTCGTTCCTTTCGA	107
RBP_lib_515	ACCGGCCAACATACCtatcttgtggaaaggacgaaacaccggCTTGGGCTGCCATCGCAGCGGTTTAAGAGCTATGCTGGAAACAGCATAGCACTCGTTCCTTTCGA	107
RBP_lib_516	ACCGGCCAACATACCtatcttgtggaaaggacgaaacaccggTTCGCAGCCCCGGGTGTCGGGTTTAAGAGCTATGCTGGAAACAGCATAGCACTCGTTCCTTTCGA	107
RBP_lib_517	ACCGGCCAACATACCtatcttgtggaaaggacgaaacaccggGAGGGAACGGTCCACGCCCCGTTTAAGAGCTATGCTGGAAACAGCATAGCACTCGTTCCTTTCGA	107
RBP_lib_518	ACCGGCCAACATACCtatcttgtggaaaggacgaaacaccggACCCGCCGATGGTGTTCGTCGTTTAAGAGCTATGCTGGAAACAGCATAGCACTCGTTCCTTTCGA	107
RBP_lib_519	ACCGGCCAACATACCtatcttgtggaaaggacgaaacaccggCCCGCCGATGGTGTTCGTCAGTTTAAGAGCTATGCTGGAAACAGCATAGCACTCGTTCCTTTCGA	107
RBP_lib_520	ACCGGCCAACATACCtatcttgtggaaaggacgaaacaccggAGGGAACGGTCCACGCCCCAGTTTAAGAGCTATGCTGGAAACAGCATAGCACTCGTTCCTTTCGA	107
RBP_lib_521	ACCGGCCAACATACCtatcttgtggaaaggacgaaacaccggCTGATTGGAAGACCCGCCGAGTTTAAGAGCTATGCTGGAAACAGCATAGCACTCGTTCCTTTCGA	107
RBP_lib_522	ACCGGCCAACATACCtatcttgtggaaaggacgaaacaccggCCCTGACGAACACCATCGGCGTTTAAGAGCTATGCTGGAAACAGCATAGCACTCGTTCCTTTCGA	107
RBP_lib_523	ACCGGCCAACATACCtatcttgtggaaaggacgaaacaccggTGGGGCGTGGACCGTTCCCTGTTTAAGAGCTATGCTGGAAACAGCATAGCACTCGTTCCTTTCGA	107
RBP_lib_524	ACCGGCCAACATACCtatcttgtggaaaggacgaaacaccggGCCCTGACGAACACCATCGGGTTTAAGAGCTATGCTGGAAACAGCATAGCACTCGTTCCTTTCGA	107
RBP_lib_525	ACCGGCCAACATACCtatcttgtggaaaggacgaaacaccggGTCAACTTTACTTCGTAAACGTTTAAGAGCTATGCTGGAAACAGCATAGCACTCGTTCCTTTCGA	107
RBP_lib_526	ACCGGCCAACATACCtatcttgtggaaaggacgaaacaccggGTGTCCCGGGCTGTGCTCAAGTTTAAGAGCTATGCTGGAAACAGCATAGCACTCGTTCCTTTCGA	107
RBP_lib_527	ACCGGCCAACATACCtatcttgtggaaaggacgaaacaccggAGAGTCCATTGAGCACAGCCGTTTAAGAGCTATGCTGGAAACAGCATAGCACTCGTTCCTTTCGA	107
RBP_lib_528	ACCGGCCAACATACCtatcttgtggaaaggacgaaacaccggTTGTCGATGCAGGCTTTGTTGTTTAAGAGCTATGCTGGAAACAGCATAGCACTCGTTCCTTTCGA	107
RBP_lib_529	ACCGGCCAACATACCtatcttgtggaaaggacgaaacaccggAAGGTTCGGCTTGTCGATGCGTTTAAGAGCTATGCTGGAAACAGCATAGCACTCGTTCCTTTCGA	107
RBP_lib_530	ACCGGCCAACATACCtatcttgtggaaaggacgaaacaccggGCACACTGTACCCATGATGCGTTTAAGAGCTATGCTGGAAACAGCATAGCACTCGTTCCTTTCGA	107
RBP_lib_531	ACCGGCCAACATACCtatcttgtggaaaggacgaaacaccggACAGTGTGCTTTAGAGTCCAGTTTAAGAGCTATGCTGGAAACAGCATAGCACTCGTTCCTTTCGA	107
RBP_lib_532	ACCGGCCAACATACCtatcttgtggaaaggacgaaacaccggAATTAAAGCTCCTCTGAGTAGTTTAAGAGCTATGCTGGAAACAGCATAGCACTCGTTCCTTTCGA	107
RBP_lib_533	ACCGGCCAACATACCtatcttgtggaaaggacgaaacaccggCAGCCGCTTCACTGCGGGGCGTTTAAGAGCTATGCTGGAAACAGCATAGCACTCGTTCCTTTCGA	107
RBP_lib_534	ACCGGCCAACATACCtatcttgtggaaaggacgaaacaccggGGCGTCCATCGAGGGACCGTGTTTAAGAGCTATGCTGGAAACAGCATAGCACTCGTTCCTTTCGA	107
RBP_lib_535	ACCGGCCAACATACCtatcttgtggaaaggacgaaacaccggAGGCGTCCATCGAGGGACCGGTTTAAGAGCTATGCTGGAAACAGCATAGCACTCGTTCCTTTCGA	107
RBP_lib_536	ACCGGCCAACATACCtatcttgtggaaaggacgaaacaccggCACCTGGAGGCGTCCATCGAGTTTAAGAGCTATGCTGGAAACAGCATAGCACTCGTTCCTTTCGA	107
RBP_lib_537	ACCGGCCAACATACCtatcttgtggaaaggacgaaacaccggTCCAGGTGTCCCACCGAAAGGTTTAAGAGCTATGCTGGAAACAGCATAGCACTCGTTCCTTTCGA	107
RBP_lib_538	ACCGGCCAACATACCtatcttgtggaaaggacgaaacaccggCGTGGGGCAGCCCCTTTCGGGTTTAAGAGCTATGCTGGAAACAGCATAGCACTCGTTCCTTTCGA	107
RBP_lib_539	ACCGGCCAACATACCtatcttgtggaaaggacgaaacaccggACACGCGGCAGTAGATGACGGTTTAAGAGCTATGCTGGAAACAGCATAGCACTCGTTCCTTTCGA	107
RBP_lib_540	ACCGGCCAACATACCtatcttgtggaaaggacgaaacaccggACCATCCCACGGTCCCTCGAGTTTAAGAGCTATGCTGGAAACAGCATAGCACTCGTTCCTTTCGA	107
RBP_lib_541	ACCGGCCAACATACCtatcttgtggaaaggacgaaacaccggGCGGCGCCCATGCTGCGCTTGTTTAAGAGCTATGCTGGAAACAGCATAGCACTCGTTCCTTTCGA	107
RBP_lib_542	ACCGGCCAACATACCtatcttgtggaaaggacgaaacaccggGGCGGCGCCCATGCTGCGCTGTTTAAGAGCTATGCTGGAAACAGCATAGCACTCGTTCCTTTCGA	107
RBP_lib_543	ACCGGCCAACATACCtatcttgtggaaaggacgaaacaccggGGCGGTTCCCGCCACCGAAGGTTTAAGAGCTATGCTGGAAACAGCATAGCACTCGTTCCTTTCGA	107
RBP_lib_544	ACCGGCCAACATACCtatcttgtggaaaggacgaaacaccggGGGAAACCCAAGCGCAGCATGTTTAAGAGCTATGCTGGAAACAGCATAGCACTCGTTCCTTTCGA	107
RBP_lib_545	ACCGGCCAACATACCtatcttgtggaaaggacgaaacaccggCACCGAAGTGGCTCTCAGACGTTTAAGAGCTATGCTGGAAACAGCATAGCACTCGTTCCTTTCGA	107
RBP_lib_546	ACCGGCCAACATACCtatcttgtggaaaggacgaaacaccggGTTAAAGCCCAGCGTCTTCCGTTTAAGAGCTATGCTGGAAACAGCATAGCACTCGTTCCTTTCGA	107
RBP_lib_547	ACCGGCCAACATACCtatcttgtggaaaggacgaaacaccggCTGAGAGCCACTTCGGTGGCGTTTAAGAGCTATGCTGGAAACAGCATAGCACTCGTTCCTTTCGA	107
RBP_lib_548	ACCGGCCAACATACCtatcttgtggaaaggacgaaacaccggGAAGACGCTGGGCTTTAACAGTTTAAGAGCTATGCTGGAAACAGCATAGCACTCGTTCCTTTCGA	107
RBP_lib_549	ACCGGCCAACATACCtatcttgtggaaaggacgaaacaccggCTGGGTTGACACCGCAGGCGGTTTAAGAGCTATGCTGGAAACAGCATAGCACTCGTTCCTTTCGA	107
RBP_lib_550	ACCGGCCAACATACCtatcttgtggaaaggacgaaacaccggCAGGCACGACCACATCCGACGTTTAAGAGCTATGCTGGAAACAGCATAGCACTCGTTCCTTTCGA	107
RBP_lib_551	ACCGGCCAACATACCtatcttgtggaaaggacgaaacaccggCTAATCAAAGTCCACGCCTGGTTTAAGAGCTATGCTGGAAACAGCATAGCACTCGTTCCTTTCGA	107
RBP_lib_552	ACCGGCCAACATACCtatcttgtggaaaggacgaaacaccggGGACTTTGATTAGGACCTGAGTTTAAGAGCTATGCTGGAAACAGCATAGCACTCGTTCCTTTCGA	107
RBP_lib_553	ACCGGCCAACATACCtatcttgtggaaaggacgaaacaccggGCTGAAGCTCCAGTCGGATGGTTTAAGAGCTATGCTGGAAACAGCATAGCACTCGTTCCTTTCGA	107
RBP_lib_554	ACCGGCCAACATACCtatcttgtggaaaggacgaaacaccggTAGAGACATACATTCGCTCTGTTTAAGAGCTATGCTGGAAACAGCATAGCACTCGTTCCTTTCGA	107
RBP_lib_555	ACCGGCCAACATACCtatcttgtggaaaggacgaaacaccggAGAAGTGCTGAAGCTCCAGTGTTTAAGAGCTATGCTGGAAACAGCATAGCACTCGTTCCTTTCGA	107
RBP_lib_556	ACCGGCCAACATACCtatcttgtggaaaggacgaaacaccggGAGCGAATGTATGTCTCTACGTTTAAGAGCTATGCTGGAAACAGCATAGCACTCGTTCCTTTCGA	107
RBP_lib_557	ACCGGCCAACATACCtatcttgtggaaaggacgaaacaccggAAGATGGGACCGGCCCCCGCGTTTAAGAGCTATGCTGGAAACAGCATAGCACTCGTTCCTTTCGA	107
RBP_lib_558	ACCGGCCAACATACCtatcttgtggaaaggacgaaacaccggGTCGGTGCTGCTCTCCGGCGGTTTAAGAGCTATGCTGGAAACAGCATAGCACTCGTTCCTTTCGA	107
RBP_lib_559	ACCGGCCAACATACCtatcttgtggaaaggacgaaacaccggTCGTCGGTGCTGCTCTCCGGGTTTAAGAGCTATGCTGGAAACAGCATAGCACTCGTTCCTTTCGA	107
RBP_lib_560	ACCGGCCAACATACCtatcttgtggaaaggacgaaacaccggCGTCGGTGCTGCTCTCCGGCGTTTAAGAGCTATGCTGGAAACAGCATAGCACTCGTTCCTTTCGA	107
RBP_lib_561	ACCGGCCAACATACCtatcttgtggaaaggacgaaacaccggACAAGATCTCGGTCTCACGGGTTTAAGAGCTATGCTGGAAACAGCATAGCACTCGTTCCTTTCGA	107
RBP_lib_562	ACCGGCCAACATACCtatcttgtggaaaggacgaaacaccggTCCTCCCGACTGAGGTTCACGTTTAAGAGCTATGCTGGAAACAGCATAGCACTCGTTCCTTTCGA	107
RBP_lib_563	ACCGGCCAACATACCtatcttgtggaaaggacgaaacaccggGCAGCACCGACGAGCAACTGGTTTAAGAGCTATGCTGGAAACAGCATAGCACTCGTTCCTTTCGA	107
RBP_lib_564	ACCGGCCAACATACCtatcttgtggaaaggacgaaacaccggGCCAGTGAACCTCAGTCGGGGTTTAAGAGCTATGCTGGAAACAGCATAGCACTCGTTCCTTTCGA	107
RBP_lib_565	ACCGGCCAACATACCtatcttgtggaaaggacgaaacaccggATGACTCGCGATTTCAAACCGTTTAAGAGCTATGCTGGAAACAGCATAGCACTCGTTCCTTTCGA	107
RBP_lib_566	ACCGGCCAACATACCtatcttgtggaaaggacgaaacaccggGGAACTTCATCTACTCGAGCGTTTAAGAGCTATGCTGGAAACAGCATAGCACTCGTTCCTTTCGA	107
RBP_lib_567	ACCGGCCAACATACCtatcttgtggaaaggacgaaacaccggTTGGCGAAGATGAGGTCTCCGTTTAAGAGCTATGCTGGAAACAGCATAGCACTCGTTCCTTTCGA	107
RBP_lib_568	ACCGGCCAACATACCtatcttgtggaaaggacgaaacaccggCTTTCATCTTGGCGAAGATGGTTTAAGAGCTATGCTGGAAACAGCATAGCACTCGTTCCTTTCGA	107
RBP_lib_569	ACCGGCCAACATACCtatcttgtggaaaggacgaaacaccggTCTACTCGAGCTGGCCAATGGTTTAAGAGCTATGCTGGAAACAGCATAGCACTCGTTCCTTTCGA	107
RBP_lib_570	ACCGGCCAACATACCtatcttgtggaaaggacgaaacaccggCTCATCTTCGCCAAGATGAAGTTTAAGAGCTATGCTGGAAACAGCATAGCACTCGTTCCTTTCGA	107
RBP_lib_571	ACCGGCCAACATACCtatcttgtggaaaggacgaaacaccggGTCCTAAAAAAGCAGTCTCAGTTTAAGAGCTATGCTGGAAACAGCATAGCACTCGTTCCTTTCGA	107
RBP_lib_572	ACCGGCCAACATACCtatcttgtggaaaggacgaaacaccggTCCTAAAAAAGCAGTCTCATGTTTAAGAGCTATGCTGGAAACAGCATAGCACTCGTTCCTTTCGA	107
RBP_lib_573	ACCGGCCAACATACCtatcttgtggaaaggacgaaacaccggCACCAAGCGTGTGCTGTACGGTTTAAGAGCTATGCTGGAAACAGCATAGCACTCGTTCCTTTCGA	107
RBP_lib_574	ACCGGCCAACATACCtatcttgtggaaaggacgaaacaccggCACGTACAGCACACGCTTGGGTTTAAGAGCTATGCTGGAAACAGCATAGCACTCGTTCCTTTCGA	107
RBP_lib_575	ACCGGCCAACATACCtatcttgtggaaaggacgaaacaccggACGGACGATTCGTGTCAATTGTTTAAGAGCTATGCTGGAAACAGCATAGCACTCGTTCCTTTCGA	107
RBP_lib_576	ACCGGCCAACATACCtatcttgtggaaaggacgaaacaccggCATGCTGCATTTATCCCCTTGTTTAAGAGCTATGCTGGAAACAGCATAGCACTCGTTCCTTTCGA	107
RBP_lib_577	ACCGGCCAACATACCtatcttgtggaaaggacgaaacaccggGAGCCCTCTTTAATTCTCATGTTTAAGAGCTATGCTGGAAACAGCATAGCACTCGTTCCTTTCGA	107
RBP_lib_578	ACCGGCCAACATACCtatcttgtggaaaggacgaaacaccggATATCTGTGATGTCTCCAAAGTTTAAGAGCTATGCTGGAAACAGCATAGCACTCGTTCCTTTCGA	107
RBP_lib_579	ACCGGCCAACATACCtatcttgtggaaaggacgaaacaccggTATCTGTGATGTCTCCAAAGGTTTAAGAGCTATGCTGGAAACAGCATAGCACTCGTTCCTTTCGA	107
RBP_lib_580	ACCGGCCAACATACCtatcttgtggaaaggacgaaacaccggAAAAGCCCGGTCAAATCCTCGTTTAAGAGCTATGCTGGAAACAGCATAGCACTCGTTCCTTTCGA	107
RBP_lib_581	ACCGGCCAACATACCtatcttgtggaaaggacgaaacaccggCCGTCAGAGGGCGTTGGAACGTTTAAGAGCTATGCTGGAAACAGCATAGCACTCGTTCCTTTCGA	107
RBP_lib_582	ACCGGCCAACATACCtatcttgtggaaaggacgaaacaccggTCACTCTGCACGTCTACCACGTTTAAGAGCTATGCTGGAAACAGCATAGCACTCGTTCCTTTCGA	107
RBP_lib_583	ACCGGCCAACATACCtatcttgtggaaaggacgaaacaccggCGTGCAGAGTGACAACTTCAGTTTAAGAGCTATGCTGGAAACAGCATAGCACTCGTTCCTTTCGA	107
RBP_lib_584	ACCGGCCAACATACCtatcttgtggaaaggacgaaacaccggCTTCAACCGGCAGTACGCCCGTTTAAGAGCTATGCTGGAAACAGCATAGCACTCGTTCCTTTCGA	107
RBP_lib_585	ACCGGCCAACATACCtatcttgtggaaaggacgaaacaccggCGTACTCCTCTATGCATAGCGTTTAAGAGCTATGCTGGAAACAGCATAGCACTCGTTCCTTTCGA	107
RBP_lib_586	ACCGGCCAACATACCtatcttgtggaaaggacgaaacaccggGTGCATTGAGGAACGTTACAGTTTAAGAGCTATGCTGGAAACAGCATAGCACTCGTTCCTTTCGA	107
RBP_lib_587	ACCGGCCAACATACCtatcttgtggaaaggacgaaacaccggGGATACCCTGGGCGTACTGCGTTTAAGAGCTATGCTGGAAACAGCATAGCACTCGTTCCTTTCGA	107
RBP_lib_588	ACCGGCCAACATACCtatcttgtggaaaggacgaaacaccggTTCAACCGGCAGTACGCCCAGTTTAAGAGCTATGCTGGAAACAGCATAGCACTCGTTCCTTTCGA	107
RBP_lib_589	ACCGGCCAACATACCtatcttgtggaaaggacgaaacaccggGTTGAGTTTCTTAAATTCATGTTTAAGAGCTATGCTGGAAACAGCATAGCACTCGTTCCTTTCGA	107
RBP_lib_590	ACCGGCCAACATACCtatcttgtggaaaggacgaaacaccggCCACAGAAGCGCCAATCACTGTTTAAGAGCTATGCTGGAAACAGCATAGCACTCGTTCCTTTCGA	107
RBP_lib_591	ACCGGCCAACATACCtatcttgtggaaaggacgaaacaccggCCAAGTGATTGGCGCTTCTGGTTTAAGAGCTATGCTGGAAACAGCATAGCACTCGTTCCTTTCGA	107
RBP_lib_592	ACCGGCCAACATACCtatcttgtggaaaggacgaaacaccggTGTCCAGCTGGCTGGAAACCGTTTAAGAGCTATGCTGGAAACAGCATAGCACTCGTTCCTTTCGA	107
RBP_lib_593	ACCGGCCAACATACCtatcttgtggaaaggacgaaacaccggCGGCGCCCTTCTCGGTAGCGGTTTAAGAGCTATGCTGGAAACAGCATAGCACTCGTTCCTTTCGA	107
RBP_lib_594	ACCGGCCAACATACCtatcttgtggaaaggacgaaacaccggAGCGGCGCCCTTCTCGGTAGGTTTAAGAGCTATGCTGGAAACAGCATAGCACTCGTTCCTTTCGA	107
RBP_lib_595	ACCGGCCAACATACCtatcttgtggaaaggacgaaacaccggCCCGAGCCCCGCTACCGAGAGTTTAAGAGCTATGCTGGAAACAGCATAGCACTCGTTCCTTTCGA	107
RBP_lib_596	ACCGGCCAACATACCtatcttgtggaaaggacgaaacaccggGTAGCGGGGCTCGGGCGATGGTTTAAGAGCTATGCTGGAAACAGCATAGCACTCGTTCCTTTCGA	107
RBP_lib_597	ACCGGCCAACATACCtatcttgtggaaaggacgaaacaccggCCGAGCCCCGCTACCGAGAAGTTTAAGAGCTATGCTGGAAACAGCATAGCACTCGTTCCTTTCGA	107
RBP_lib_598	ACCGGCCAACATACCtatcttgtggaaaggacgaaacaccggATCCTCATGGGCCGGCGGCGGTTTAAGAGCTATGCTGGAAACAGCATAGCACTCGTTCCTTTCGA	107
RBP_lib_599	ACCGGCCAACATACCtatcttgtggaaaggacgaaacaccggCCTTCTCGGTAGCGGGGCTCGTTTAAGAGCTATGCTGGAAACAGCATAGCACTCGTTCCTTTCGA	107
RBP_lib_600	ACCGGCCAACATACCtatcttgtggaaaggacgaaacaccggTATCCTCATGGGCCGGCGGCGTTTAAGAGCTATGCTGGAAACAGCATAGCACTCGTTCCTTTCGA	107
RBP_lib_601	ACCGGCCAACATACCtatcttgtggaaaggacgaaacaccggTCTGCGTGATGGACCGCTCAGTTTAAGAGCTATGCTGGAAACAGCATAGCACTCGTTCCTTTCGA	107
RBP_lib_602	ACCGGCCAACATACCtatcttgtggaaaggacgaaacaccggCAGATCAAGTATAACCGCGAGTTTAAGAGCTATGCTGGAAACAGCATAGCACTCGTTCCTTTCGA	107
RBP_lib_603	ACCGGCCAACATACCtatcttgtggaaaggacgaaacaccggACCGCTCATGGCCCTGCAGCGTTTAAGAGCTATGCTGGAAACAGCATAGCACTCGTTCCTTTCGA	107
RBP_lib_604	ACCGGCCAACATACCtatcttgtggaaaggacgaaacaccggACGTGTGGTACTCTGTCAATGTTTAAGAGCTATGCTGGAAACAGCATAGCACTCGTTCCTTTCGA	107
RBP_lib_605	ACCGGCCAACATACCtatcttgtggaaaggacgaaacaccggTCCTGCTGCAGGGCCATGAGGTTTAAGAGCTATGCTGGAAACAGCATAGCACTCGTTCCTTTCGA	107
RBP_lib_606	ACCGGCCAACATACCtatcttgtggaaaggacgaaacaccggAGGAGACCTTCTCTTCACCGGTTTAAGAGCTATGCTGGAAACAGCATAGCACTCGTTCCTTTCGA	107
RBP_lib_607	ACCGGCCAACATACCtatcttgtggaaaggacgaaacaccggAACGTGTGGTACTCTGTCAAGTTTAAGAGCTATGCTGGAAACAGCATAGCACTCGTTCCTTTCGA	107
RBP_lib_608	ACCGGCCAACATACCtatcttgtggaaaggacgaaacaccggGGTACTCTGTCAATGGGGAGGTTTAAGAGCTATGCTGGAAACAGCATAGCACTCGTTCCTTTCGA	107
RBP_lib_609	ACCGGCCAACATACCtatcttgtggaaaggacgaaacaccggCAACATCATCTTCGAATCCAGTTTAAGAGCTATGCTGGAAACAGCATAGCACTCGTTCCTTTCGA	107
RBP_lib_610	ACCGGCCAACATACCtatcttgtggaaaggacgaaacaccggTCTTGTGCACTCAACAGCAGGTTTAAGAGCTATGCTGGAAACAGCATAGCACTCGTTCCTTTCGA	107
RBP_lib_611	ACCGGCCAACATACCtatcttgtggaaaggacgaaacaccggTTTCTTGTGCACTCAACAGCGTTTAAGAGCTATGCTGGAAACAGCATAGCACTCGTTCCTTTCGA	107
RBP_lib_612	ACCGGCCAACATACCtatcttgtggaaaggacgaaacaccggCTCGGTCACGATCCAAATCTGTTTAAGAGCTATGCTGGAAACAGCATAGCACTCGTTCCTTTCGA	107
RBP_lib_613	ACCGGCCAACATACCtatcttgtggaaaggacgaaacaccggTAGGAAAGCAGAAGGGATTCGTTTAAGAGCTATGCTGGAAACAGCATAGCACTCGTTCCTTTCGA	107
RBP_lib_614	ACCGGCCAACATACCtatcttgtggaaaggacgaaacaccggCACGATCCAAATCTCGGTCTGTTTAAGAGCTATGCTGGAAACAGCATAGCACTCGTTCCTTTCGA	107
RBP_lib_615	ACCGGCCAACATACCtatcttgtggaaaggacgaaacaccggTTGGATCGTGACCGAGATCTGTTTAAGAGCTATGCTGGAAACAGCATAGCACTCGTTCCTTTCGA	107
RBP_lib_616	ACCGGCCAACATACCtatcttgtggaaaggacgaaacaccggTCGGGTCCGAGACCGAGATTGTTTAAGAGCTATGCTGGAAACAGCATAGCACTCGTTCCTTTCGA	107
RBP_lib_617	ACCGGCCAACATACCtatcttgtggaaaggacgaaacaccggCGGGATCGGTTCCGGAGTCGGTTTAAGAGCTATGCTGGAAACAGCATAGCACTCGTTCCTTTCGA	107
RBP_lib_618	ACCGGCCAACATACCtatcttgtggaaaggacgaaacaccggCGGTTCCGGAGTCGCGGTGGGTTTAAGAGCTATGCTGGAAACAGCATAGCACTCGTTCCTTTCGA	107
RBP_lib_619	ACCGGCCAACATACCtatcttgtggaaaggacgaaacaccggGATCGGTTCCGGAGTCGCGGGTTTAAGAGCTATGCTGGAAACAGCATAGCACTCGTTCCTTTCGA	107
RBP_lib_620	ACCGGCCAACATACCtatcttgtggaaaggacgaaacaccggGCGGCGGTGGAGGCTTTCACGTTTAAGAGCTATGCTGGAAACAGCATAGCACTCGTTCCTTTCGA	107
RBP_lib_621	ACCGGCCAACATACCtatcttgtggaaaggacgaaacaccggCGACTTCCGCTCTCCGCCGCGTTTAAGAGCTATGCTGGAAACAGCATAGCACTCGTTCCTTTCGA	107
RBP_lib_622	ACCGGCCAACATACCtatcttgtggaaaggacgaaacaccggGGCTTTCACCGGCGTGGAGGGTTTAAGAGCTATGCTGGAAACAGCATAGCACTCGTTCCTTTCGA	107
RBP_lib_623	ACCGGCCAACATACCtatcttgtggaaaggacgaaacaccggGGCCCATGGGGCCGCGGTTCGTTTAAGAGCTATGCTGGAAACAGCATAGCACTCGTTCCTTTCGA	107
RBP_lib_624	ACCGGCCAACATACCtatcttgtggaaaggacgaaacaccggGGTGGAGGCTTTCACCGGCGGTTTAAGAGCTATGCTGGAAACAGCATAGCACTCGTTCCTTTCGA	107
RBP_lib_625	ACCGGCCAACATACCtatcttgtggaaaggacgaaacaccggTGGCTTCCGCGCCATCCGCGGTTTAAGAGCTATGCTGGAAACAGCATAGCACTCGTTCCTTTCGA	107
RBP_lib_626	ACCGGCCAACATACCtatcttgtggaaaggacgaaacaccggCTGGCTTCCGCGCCATCCGCGTTTAAGAGCTATGCTGGAAACAGCATAGCACTCGTTCCTTTCGA	107
RBP_lib_627	ACCGGCCAACATACCtatcttgtggaaaggacgaaacaccggGGCGGCTGTGACTGAAGTTGGTTTAAGAGCTATGCTGGAAACAGCATAGCACTCGTTCCTTTCGA	107
RBP_lib_628	ACCGGCCAACATACCtatcttgtggaaaggacgaaacaccggAGCCAGGCCCTTGGCGGCCGGTTTAAGAGCTATGCTGGAAACAGCATAGCACTCGTTCCTTTCGA	107
RBP_lib_629	ACCGGCCAACATACCtatcttgtggaaaggacgaaacaccggAGCTCGTAAGCTGAATCACCGTTTAAGAGCTATGCTGGAAACAGCATAGCACTCGTTCCTTTCGA	107
RBP_lib_630	ACCGGCCAACATACCtatcttgtggaaaggacgaaacaccggGCCAGCTCCTCGGCCGCCAAGTTTAAGAGCTATGCTGGAAACAGCATAGCACTCGTTCCTTTCGA	107
RBP_lib_631	ACCGGCCAACATACCtatcttgtggaaaggacgaaacaccggTGGCGCGGAAGCCAGGCCCTGTTTAAGAGCTATGCTGGAAACAGCATAGCACTCGTTCCTTTCGA	107
RBP_lib_632	ACCGGCCAACATACCtatcttgtggaaaggacgaaacaccggCCTGGCTTCCGCGCCATCCGGTTTAAGAGCTATGCTGGAAACAGCATAGCACTCGTTCCTTTCGA	107
RBP_lib_633	ACCGGCCAACATACCtatcttgtggaaaggacgaaacaccggGCCTCACCGATCGCTATTGGGTTTAAGAGCTATGCTGGAAACAGCATAGCACTCGTTCCTTTCGA	107
RBP_lib_634	ACCGGCCAACATACCtatcttgtggaaaggacgaaacaccggTCACGACGCGGCTCTGGCTGGTTTAAGAGCTATGCTGGAAACAGCATAGCACTCGTTCCTTTCGA	107
RBP_lib_635	ACCGGCCAACATACCtatcttgtggaaaggacgaaacaccggCCCGCCAATAGCGATCGGTGGTTTAAGAGCTATGCTGGAAACAGCATAGCACTCGTTCCTTTCGA	107
RBP_lib_636	ACCGGCCAACATACCtatcttgtggaaaggacgaaacaccggCTGAACCCGCCAATAGCGATGTTTAAGAGCTATGCTGGAAACAGCATAGCACTCGTTCCTTTCGA	107
RBP_lib_637	ACCGGCCAACATACCtatcttgtggaaaggacgaaacaccggCGATCGCTATTGGCGGGTTCGTTTAAGAGCTATGCTGGAAACAGCATAGCACTCGTTCCTTTCGA	107
RBP_lib_638	ACCGGCCAACATACCtatcttgtggaaaggacgaaacaccggTCTTCCTCACGACGCGGCTCGTTTAAGAGCTATGCTGGAAACAGCATAGCACTCGTTCCTTTCGA	107
RBP_lib_639	ACCGGCCAACATACCtatcttgtggaaaggacgaaacaccggACCGCCTCACCGATCGCTATGTTTAAGAGCTATGCTGGAAACAGCATAGCACTCGTTCCTTTCGA	107
RBP_lib_640	ACCGGCCAACATACCtatcttgtggaaaggacgaaacaccggTCGCTATTGGCGGGTTCAGGGTTTAAGAGCTATGCTGGAAACAGCATAGCACTCGTTCCTTTCGA	107
RBP_lib_641	ACCGGCCAACATACCtatcttgtggaaaggacgaaacaccggGCAATCCGTCTTCATCCACGGTTTAAGAGCTATGCTGGAAACAGCATAGCACTCGTTCCTTTCGA	107
RBP_lib_642	ACCGGCCAACATACCtatcttgtggaaaggacgaaacaccggGGTTGGATATGATTTCCGATGTTTAAGAGCTATGCTGGAAACAGCATAGCACTCGTTCCTTTCGA	107
RBP_lib_643	ACCGGCCAACATACCtatcttgtggaaaggacgaaacaccggGAAGTGGTGTAGCGACCAATGTTTAAGAGCTATGCTGGAAACAGCATAGCACTCGTTCCTTTCGA	107
RBP_lib_644	ACCGGCCAACATACCtatcttgtggaaaggacgaaacaccggGGCAATCCGTCTTCATCCACGTTTAAGAGCTATGCTGGAAACAGCATAGCACTCGTTCCTTTCGA	107
RBP_lib_645	ACCGGCCAACATACCtatcttgtggaaaggacgaaacaccggTCGCAGGCTCATTGTTGTACGTTTAAGAGCTATGCTGGAAACAGCATAGCACTCGTTCCTTTCGA	107
RBP_lib_646	ACCGGCCAACATACCtatcttgtggaaaggacgaaacaccggGGGCAATCCGTCTTCATCCAGTTTAAGAGCTATGCTGGAAACAGCATAGCACTCGTTCCTTTCGA	107
RBP_lib_647	ACCGGCCAACATACCtatcttgtggaaaggacgaaacaccggTGAACTTGATGTGAATGACTGTTTAAGAGCTATGCTGGAAACAGCATAGCACTCGTTCCTTTCGA	107
RBP_lib_648	ACCGGCCAACATACCtatcttgtggaaaggacgaaacaccggGGCCTCGTTGTCAGTGGTCAGTTTAAGAGCTATGCTGGAAACAGCATAGCACTCGTTCCTTTCGA	107
RBP_lib_649	ACCGGCCAACATACCtatcttgtggaaaggacgaaacaccggGCCGTAACGTACACGGAGTCGTTTAAGAGCTATGCTGGAAACAGCATAGCACTCGTTCCTTTCGA	107
RBP_lib_650	ACCGGCCAACATACCtatcttgtggaaaggacgaaacaccggCCGTAACGTACACGGAGTCTGTTTAAGAGCTATGCTGGAAACAGCATAGCACTCGTTCCTTTCGA	107
RBP_lib_651	ACCGGCCAACATACCtatcttgtggaaaggacgaaacaccggGTTCGCTGCCGTAACGTACAGTTTAAGAGCTATGCTGGAAACAGCATAGCACTCGTTCCTTTCGA	107
RBP_lib_652	ACCGGCCAACATACCtatcttgtggaaaggacgaaacaccggTACATCCCCCGACATCTCCAGTTTAAGAGCTATGCTGGAAACAGCATAGCACTCGTTCCTTTCGA	107
RBP_lib_653	ACCGGCCAACATACCtatcttgtggaaaggacgaaacaccggCTACATCCCCCGACATCTCCGTTTAAGAGCTATGCTGGAAACAGCATAGCACTCGTTCCTTTCGA	107
RBP_lib_654	ACCGGCCAACATACCtatcttgtggaaaggacgaaacaccggAAAAGGTCCCTTTCACTCGTGTTTAAGAGCTATGCTGGAAACAGCATAGCACTCGTTCCTTTCGA	107
RBP_lib_655	ACCGGCCAACATACCtatcttgtggaaaggacgaaacaccggGATCTCCCAACTCGCTTCCCGTTTAAGAGCTATGCTGGAAACAGCATAGCACTCGTTCCTTTCGA	107
RBP_lib_656	ACCGGCCAACATACCtatcttgtggaaaggacgaaacaccggTTCAGGGTATTCGGATCCAAGTTTAAGAGCTATGCTGGAAACAGCATAGCACTCGTTCCTTTCGA	107
RBP_lib_657	ACCGGCCAACATACCtatcttgtggaaaggacgaaacaccggAGTTGTTCCGCGACGACGAGGTTTAAGAGCTATGCTGGAAACAGCATAGCACTCGTTCCTTTCGA	107
RBP_lib_658	ACCGGCCAACATACCtatcttgtggaaaggacgaaacaccggGTTGTTCCGCGACGACGAGCGTTTAAGAGCTATGCTGGAAACAGCATAGCACTCGTTCCTTTCGA	107
RBP_lib_659	ACCGGCCAACATACCtatcttgtggaaaggacgaaacaccggCGGCACTGGGGGCAACCGGGGTTTAAGAGCTATGCTGGAAACAGCATAGCACTCGTTCCTTTCGA	107
RBP_lib_660	ACCGGCCAACATACCtatcttgtggaaaggacgaaacaccggCCAAAGCCCGCTCGTCGTCGGTTTAAGAGCTATGCTGGAAACAGCATAGCACTCGTTCCTTTCGA	107
RBP_lib_661	ACCGGCCAACATACCtatcttgtggaaaggacgaaacaccggCCGCGACGACGAGCGGGCTTGTTTAAGAGCTATGCTGGAAACAGCATAGCACTCGTTCCTTTCGA	107
RBP_lib_662	ACCGGCCAACATACCtatcttgtggaaaggacgaaacaccggGTCGTCGCGGAACAACTTGCGTTTAAGAGCTATGCTGGAAACAGCATAGCACTCGTTCCTTTCGA	107
RBP_lib_663	ACCGGCCAACATACCtatcttgtggaaaggacgaaacaccggGGGGCCGTGCCAAGCCGGAGGTTTAAGAGCTATGCTGGAAACAGCATAGCACTCGTTCCTTTCGA	107
RBP_lib_664	ACCGGCCAACATACCtatcttgtggaaaggacgaaacaccggCGACGAGCGGGCTTTGGCCCGTTTAAGAGCTATGCTGGAAACAGCATAGCACTCGTTCCTTTCGA	107
RBP_lib_665	ACCGGCCAACATACCtatcttgtggaaaggacgaaacaccggAGCTTGACGAAACCTCGCCAGTTTAAGAGCTATGCTGGAAACAGCATAGCACTCGTTCCTTTCGA	107
RBP_lib_666	ACCGGCCAACATACCtatcttgtggaaaggacgaaacaccggGAGCTTGACGAAACCTCGCCGTTTAAGAGCTATGCTGGAAACAGCATAGCACTCGTTCCTTTCGA	107
RBP_lib_667	ACCGGCCAACATACCtatcttgtggaaaggacgaaacaccggATGTACTGAGTTGCCGAAAGGTTTAAGAGCTATGCTGGAAACAGCATAGCACTCGTTCCTTTCGA	107
RBP_lib_668	ACCGGCCAACATACCtatcttgtggaaaggacgaaacaccggGAGGTTTCGTCAAGCTCAGCGTTTAAGAGCTATGCTGGAAACAGCATAGCACTCGTTCCTTTCGA	107
RBP_lib_669	ACCGGCCAACATACCtatcttgtggaaaggacgaaacaccggTCGTCAAGCTCAGCTGGAAGGTTTAAGAGCTATGCTGGAAACAGCATAGCACTCGTTCCTTTCGA	107
RBP_lib_670	ACCGGCCAACATACCtatcttgtggaaaggacgaaacaccggCGTCATTCAGGTCCCGAATTGTTTAAGAGCTATGCTGGAAACAGCATAGCACTCGTTCCTTTCGA	107
RBP_lib_671	ACCGGCCAACATACCtatcttgtggaaaggacgaaacaccggGCTTAGGGGAATTCCGAATTGTTTAAGAGCTATGCTGGAAACAGCATAGCACTCGTTCCTTTCGA	107
RBP_lib_672	ACCGGCCAACATACCtatcttgtggaaaggacgaaacaccggCGTCTCCACTTCTCCGCTTTGTTTAAGAGCTATGCTGGAAACAGCATAGCACTCGTTCCTTTCGA	107
RBP_lib_673	ACCGGCCAACATACCtatcttgtggaaaggacgaaacaccggACTGGAGCCCCCACCAATAGGTTTAAGAGCTATGCTGGAAACAGCATAGCACTCGTTCCTTTCGA	107
RBP_lib_674	ACCGGCCAACATACCtatcttgtggaaaggacgaaacaccggGTCTGGTAAAATTCCGAATCGTTTAAGAGCTATGCTGGAAACAGCATAGCACTCGTTCCTTTCGA	107
RBP_lib_675	ACCGGCCAACATACCtatcttgtggaaaggacgaaacaccggGACTGCACTGCGAAAGCTTTGTTTAAGAGCTATGCTGGAAACAGCATAGCACTCGTTCCTTTCGA	107
RBP_lib_676	ACCGGCCAACATACCtatcttgtggaaaggacgaaacaccggTGACTGCACTGCGAAAGCTTGTTTAAGAGCTATGCTGGAAACAGCATAGCACTCGTTCCTTTCGA	107
RBP_lib_677	ACCGGCCAACATACCtatcttgtggaaaggacgaaacaccggAGTCAGCTGTGCGGATGGCGGTTTAAGAGCTATGCTGGAAACAGCATAGCACTCGTTCCTTTCGA	107
RBP_lib_678	ACCGGCCAACATACCtatcttgtggaaaggacgaaacaccggCTTTGATACGATGCCTGATTGTTTAAGAGCTATGCTGGAAACAGCATAGCACTCGTTCCTTTCGA	107
RBP_lib_679	ACCGGCCAACATACCtatcttgtggaaaggacgaaacaccggACGTTTGTGCGGATAGCCTCGTTTAAGAGCTATGCTGGAAACAGCATAGCACTCGTTCCTTTCGA	107
RBP_lib_680	ACCGGCCAACATACCtatcttgtggaaaggacgaaacaccggGGATGGCGAGGTCCTTTCACGTTTAAGAGCTATGCTGGAAACAGCATAGCACTCGTTCCTTTCGA	107
RBP_lib_681	ACCGGCCAACATACCtatcttgtggaaaggacgaaacaccggAAGTAGGAGACTGTGGGGCTGTTTAAGAGCTATGCTGGAAACAGCATAGCACTCGTTCCTTTCGA	107
RBP_lib_682	ACCGGCCAACATACCtatcttgtggaaaggacgaaacaccggAGAGAAGCTTCGGCATGCCGGTTTAAGAGCTATGCTGGAAACAGCATAGCACTCGTTCCTTTCGA	107
RBP_lib_683	ACCGGCCAACATACCtatcttgtggaaaggacgaaacaccggTTGATCGCTGGAACGAGAAGGTTTAAGAGCTATGCTGGAAACAGCATAGCACTCGTTCCTTTCGA	107
RBP_lib_684	ACCGGCCAACATACCtatcttgtggaaaggacgaaacaccggTGATCGCTGGAACGAGAAGAGTTTAAGAGCTATGCTGGAAACAGCATAGCACTCGTTCCTTTCGA	107
RBP_lib_685	ACCGGCCAACATACCtatcttgtggaaaggacgaaacaccggACTGTGGGGCTGGGTGCCCTGTTTAAGAGCTATGCTGGAAACAGCATAGCACTCGTTCCTTTCGA	107
RBP_lib_686	ACCGGCCAACATACCtatcttgtggaaaggacgaaacaccggGGTGCTTCTCGAAATTCCCCGTTTAAGAGCTATGCTGGAAACAGCATAGCACTCGTTCCTTTCGA	107
RBP_lib_687	ACCGGCCAACATACCtatcttgtggaaaggacgaaacaccggAACGAGAAGAGGGCTCTGTTGTTTAAGAGCTATGCTGGAAACAGCATAGCACTCGTTCCTTTCGA	107
RBP_lib_688	ACCGGCCAACATACCtatcttgtggaaaggacgaaacaccggGTTCCAGCGATCAACCACTTGTTTAAGAGCTATGCTGGAAACAGCATAGCACTCGTTCCTTTCGA	107
RBP_lib_689	ACCGGCCAACATACCtatcttgtggaaaggacgaaacaccggACCTCGGGGGGCGTCTCGAGGTTTAAGAGCTATGCTGGAAACAGCATAGCACTCGTTCCTTTCGA	107
RBP_lib_690	ACCGGCCAACATACCtatcttgtggaaaggacgaaacaccggCCACCTCGGGGGGCGTCTCGGTTTAAGAGCTATGCTGGAAACAGCATAGCACTCGTTCCTTTCGA	107
RBP_lib_691	ACCGGCCAACATACCtatcttgtggaaaggacgaaacaccggCACCTCGGGGGGCGTCTCGAGTTTAAGAGCTATGCTGGAAACAGCATAGCACTCGTTCCTTTCGA	107
RBP_lib_692	ACCGGCCAACATACCtatcttgtggaaaggacgaaacaccggGCGTCTCGAGGGGTCTCTTGGTTTAAGAGCTATGCTGGAAACAGCATAGCACTCGTTCCTTTCGA	107
RBP_lib_693	ACCGGCCAACATACCtatcttgtggaaaggacgaaacaccggGGGTCTCTTGCGGGAATCCGGTTTAAGAGCTATGCTGGAAACAGCATAGCACTCGTTCCTTTCGA	107
RBP_lib_694	ACCGGCCAACATACCtatcttgtggaaaggacgaaacaccggTTGCGGGAATCCGGGGCCTCGTTTAAGAGCTATGCTGGAAACAGCATAGCACTCGTTCCTTTCGA	107
RBP_lib_695	ACCGGCCAACATACCtatcttgtggaaaggacgaaacaccggGATTGAGCCGGCGGCGTAGCGTTTAAGAGCTATGCTGGAAACAGCATAGCACTCGTTCCTTTCGA	107
RBP_lib_696	ACCGGCCAACATACCtatcttgtggaaaggacgaaacaccggGAAGAGGCCGTGCACCGCGCGTTTAAGAGCTATGCTGGAAACAGCATAGCACTCGTTCCTTTCGA	107
RBP_lib_697	ACCGGCCAACATACCtatcttgtggaaaggacgaaacaccggACAAGCAACTCAAAGCTACGGTTTAAGAGCTATGCTGGAAACAGCATAGCACTCGTTCCTTTCGA	107
RBP_lib_698	ACCGGCCAACATACCtatcttgtggaaaggacgaaacaccggCTGTAACTCTGTTGGCCATAGTTTAAGAGCTATGCTGGAAACAGCATAGCACTCGTTCCTTTCGA	107
RBP_lib_699	ACCGGCCAACATACCtatcttgtggaaaggacgaaacaccggGTAGCTTTGAGTTGCTTGTTGTTTAAGAGCTATGCTGGAAACAGCATAGCACTCGTTCCTTTCGA	107
RBP_lib_700	ACCGGCCAACATACCtatcttgtggaaaggacgaaacaccggCGTAGCTTTGAGTTGCTTGTGTTTAAGAGCTATGCTGGAAACAGCATAGCACTCGTTCCTTTCGA	107
RBP_lib_701	ACCGGCCAACATACCtatcttgtggaaaggacgaaacaccggAACAAGCAACTCAAAGCTACGTTTAAGAGCTATGCTGGAAACAGCATAGCACTCGTTCCTTTCGA	107
RBP_lib_702	ACCGGCCAACATACCtatcttgtggaaaggacgaaacaccggTATGGCCAACAGAGTTACAGGTTTAAGAGCTATGCTGGAAACAGCATAGCACTCGTTCCTTTCGA	107
RBP_lib_703	ACCGGCCAACATACCtatcttgtggaaaggacgaaacaccggAGCAGCTATGGTTCTTCTTAGTTTAAGAGCTATGCTGGAAACAGCATAGCACTCGTTCCTTTCGA	107
RBP_lib_704	ACCGGCCAACATACCtatcttgtggaaaggacgaaacaccggCAACAGGATCGTGGGGGCCGGTTTAAGAGCTATGCTGGAAACAGCATAGCACTCGTTCCTTTCGA	107
RBP_lib_705	ACCGGCCAACATACCtatcttgtggaaaggacgaaacaccggACGCGGTGGCGGTGCGCTTGGTTTAAGAGCTATGCTGGAAACAGCATAGCACTCGTTCCTTTCGA	107
RBP_lib_706	ACCGGCCAACATACCtatcttgtggaaaggacgaaacaccggAGTCCTCTCTCCGCTACTCGGTTTAAGAGCTATGCTGGAAACAGCATAGCACTCGTTCCTTTCGA	107
RBP_lib_707	ACCGGCCAACATACCtatcttgtggaaaggacgaaacaccggTGTCGTCCATAGCAGCGTCCGTTTAAGAGCTATGCTGGAAACAGCATAGCACTCGTTCCTTTCGA	107
RBP_lib_708	ACCGGCCAACATACCtatcttgtggaaaggacgaaacaccggCAAGTCCTCTCTCCGCTACTGTTTAAGAGCTATGCTGGAAACAGCATAGCACTCGTTCCTTTCGA	107
RBP_lib_709	ACCGGCCAACATACCtatcttgtggaaaggacgaaacaccggTGAAGCGTTGGCGAGTGAGAGTTTAAGAGCTATGCTGGAAACAGCATAGCACTCGTTCCTTTCGA	107
RBP_lib_710	ACCGGCCAACATACCtatcttgtggaaaggacgaaacaccggGCGTCCCGGCACAGAGACCCGTTTAAGAGCTATGCTGGAAACAGCATAGCACTCGTTCCTTTCGA	107
RBP_lib_711	ACCGGCCAACATACCtatcttgtggaaaggacgaaacaccggACGCAAGCGCCGCCATCTCTGTTTAAGAGCTATGCTGGAAACAGCATAGCACTCGTTCCTTTCGA	107
RBP_lib_712	ACCGGCCAACATACCtatcttgtggaaaggacgaaacaccggCGTCCCGGCACAGAGACCCCGTTTAAGAGCTATGCTGGAAACAGCATAGCACTCGTTCCTTTCGA	107
RBP_lib_713	ACCGGCCAACATACCtatcttgtggaaaggacgaaacaccggGGTCCCCGCGCAATCTCCAGGTTTAAGAGCTATGCTGGAAACAGCATAGCACTCGTTCCTTTCGA	107
RBP_lib_714	ACCGGCCAACATACCtatcttgtggaaaggacgaaacaccggTGCCCTCTGGAGATTGCGCGGTTTAAGAGCTATGCTGGAAACAGCATAGCACTCGTTCCTTTCGA	107
RBP_lib_715	ACCGGCCAACATACCtatcttgtggaaaggacgaaacaccggGTCCCCGCGCAATCTCCAGAGTTTAAGAGCTATGCTGGAAACAGCATAGCACTCGTTCCTTTCGA	107
RBP_lib_716	ACCGGCCAACATACCtatcttgtggaaaggacgaaacaccggTGACTTCGTCCCGTCCGCGCGTTTAAGAGCTATGCTGGAAACAGCATAGCACTCGTTCCTTTCGA	107
RBP_lib_717	ACCGGCCAACATACCtatcttgtggaaaggacgaaacaccggTCCGCCGCGGAACTGCCCTCGTTTAAGAGCTATGCTGGAAACAGCATAGCACTCGTTCCTTTCGA	107
RBP_lib_718	ACCGGCCAACATACCtatcttgtggaaaggacgaaacaccggGACTTCGTCCCGTCCGCGCTGTTTAAGAGCTATGCTGGAAACAGCATAGCACTCGTTCCTTTCGA	107
RBP_lib_719	ACCGGCCAACATACCtatcttgtggaaaggacgaaacaccggCGGGGACCACAGCACCGCTGGTTTAAGAGCTATGCTGGAAACAGCATAGCACTCGTTCCTTTCGA	107
RBP_lib_720	ACCGGCCAACATACCtatcttgtggaaaggacgaaacaccggCGGGACGAAGTCATCCGCCGGTTTAAGAGCTATGCTGGAAACAGCATAGCACTCGTTCCTTTCGA	107
RBP_lib_721	ACCGGCCAACATACCtatcttgtggaaaggacgaaacaccggGACGAATGAGAAAGCCCTTGGTTTAAGAGCTATGCTGGAAACAGCATAGCACTCGTTCCTTTCGA	107
RBP_lib_722	ACCGGCCAACATACCtatcttgtggaaaggacgaaacaccggCGAGAAACGAATAAGTCAAGGTTTAAGAGCTATGCTGGAAACAGCATAGCACTCGTTCCTTTCGA	107
RBP_lib_723	ACCGGCCAACATACCtatcttgtggaaaggacgaaacaccggCTCTTGACTTATTCGTTTCTGTTTAAGAGCTATGCTGGAAACAGCATAGCACTCGTTCCTTTCGA	107
RBP_lib_724	ACCGGCCAACATACCtatcttgtggaaaggacgaaacaccggTTTGCCAAACACTGCCTCAAGTTTAAGAGCTATGCTGGAAACAGCATAGCACTCGTTCCTTTCGA	107
RBP_lib_725	ACCGGCCAACATACCtatcttgtggaaaggacgaaacaccggGCAGCATCCTTTGCATCTGCGTTTAAGAGCTATGCTGGAAACAGCATAGCACTCGTTCCTTTCGA	107
RBP_lib_726	ACCGGCCAACATACCtatcttgtggaaaggacgaaacaccggACCAGAGGACCCCCCTCCCGGTTTAAGAGCTATGCTGGAAACAGCATAGCACTCGTTCCTTTCGA	107
RBP_lib_727	ACCGGCCAACATACCtatcttgtggaaaggacgaaacaccggGCCTCTGCTTCTTGGAGGTGGTTTAAGAGCTATGCTGGAAACAGCATAGCACTCGTTCCTTTCGA	107
RBP_lib_728	ACCGGCCAACATACCtatcttgtggaaaggacgaaacaccggGGACCTCTGCCAGTAAAACGGTTTAAGAGCTATGCTGGAAACAGCATAGCACTCGTTCCTTTCGA	107
RBP_lib_729	ACCGGCCAACATACCtatcttgtggaaaggacgaaacaccggGACTACAGTGGCAGAAGCCAGTTTAAGAGCTATGCTGGAAACAGCATAGCACTCGTTCCTTTCGA	107
RBP_lib_730	ACCGGCCAACATACCtatcttgtggaaaggacgaaacaccggAGACTACAGTGGCAGAAGCCGTTTAAGAGCTATGCTGGAAACAGCATAGCACTCGTTCCTTTCGA	107
RBP_lib_731	ACCGGCCAACATACCtatcttgtggaaaggacgaaacaccggTACAGTGGCAGAAGCCAGGGGTTTAAGAGCTATGCTGGAAACAGCATAGCACTCGTTCCTTTCGA	107
RBP_lib_732	ACCGGCCAACATACCtatcttgtggaaaggacgaaacaccggCGCAGGGAACGATCCACCGCGTTTAAGAGCTATGCTGGAAACAGCATAGCACTCGTTCCTTTCGA	107
RBP_lib_733	ACCGGCCAACATACCtatcttgtggaaaggacgaaacaccggGCAGGGAACGATCCACCGCAGTTTAAGAGCTATGCTGGAAACAGCATAGCACTCGTTCCTTTCGA	107
RBP_lib_734	ACCGGCCAACATACCtatcttgtggaaaggacgaaacaccggACGCCCATTCAAGTTCCGCAGTTTAAGAGCTATGCTGGAAACAGCATAGCACTCGTTCCTTTCGA	107
RBP_lib_735	ACCGGCCAACATACCtatcttgtggaaaggacgaaacaccggTTGGTATACGATAGGGAGACGTTTAAGAGCTATGCTGGAAACAGCATAGCACTCGTTCCTTTCGA	107
RBP_lib_736	ACCGGCCAACATACCtatcttgtggaaaggacgaaacaccggGTGCCATGCGGAACTTGAATGTTTAAGAGCTATGCTGGAAACAGCATAGCACTCGTTCCTTTCGA	107
RBP_lib_737	ACCGGCCAACATACCtatcttgtggaaaggacgaaacaccggCAGCGGGAGAGCACTTCGAGGTTTAAGAGCTATGCTGGAAACAGCATAGCACTCGTTCCTTTCGA	107
RBP_lib_738	ACCGGCCAACATACCtatcttgtggaaaggacgaaacaccggTTGAATGGGCGTGAATTCAGGTTTAAGAGCTATGCTGGAAACAGCATAGCACTCGTTCCTTTCGA	107
RBP_lib_739	ACCGGCCAACATACCtatcttgtggaaaggacgaaacaccggTGAATGGGCGTGAATTCAGCGTTTAAGAGCTATGCTGGAAACAGCATAGCACTCGTTCCTTTCGA	107
RBP_lib_740	ACCGGCCAACATACCtatcttgtggaaaggacgaaacaccggCGGCGGCGGCAAAGCCGAGAGTTTAAGAGCTATGCTGGAAACAGCATAGCACTCGTTCCTTTCGA	107
RBP_lib_741	ACCGGCCAACATACCtatcttgtggaaaggacgaaacaccggCCCGAGCGAGGCCAACCTTCGTTTAAGAGCTATGCTGGAAACAGCATAGCACTCGTTCCTTTCGA	107
RBP_lib_742	ACCGGCCAACATACCtatcttgtggaaaggacgaaacaccggCTGAAGGTTGGCCTCGCTCGGTTTAAGAGCTATGCTGGAAACAGCATAGCACTCGTTCCTTTCGA	107
RBP_lib_743	ACCGGCCAACATACCtatcttgtggaaaggacgaaacaccggGTCCGGACCCTATTTGTCAGGTTTAAGAGCTATGCTGGAAACAGCATAGCACTCGTTCCTTTCGA	107
RBP_lib_744	ACCGGCCAACATACCtatcttgtggaaaggacgaaacaccggCCTGAAGGTTGGCCTCGCTCGTTTAAGAGCTATGCTGGAAACAGCATAGCACTCGTTCCTTTCGA	107
RBP_lib_745	ACCGGCCAACATACCtatcttgtggaaaggacgaaacaccggGCTCGGGGTGTTCTCCTTCTGTTTAAGAGCTATGCTGGAAACAGCATAGCACTCGTTCCTTTCGA	107
RBP_lib_746	ACCGGCCAACATACCtatcttgtggaaaggacgaaacaccggTCCTGAAGGTTGGCCTCGCTGTTTAAGAGCTATGCTGGAAACAGCATAGCACTCGTTCCTTTCGA	107
RBP_lib_747	ACCGGCCAACATACCtatcttgtggaaaggacgaaacaccggGACCGCTGACAAATAGGGTCGTTTAAGAGCTATGCTGGAAACAGCATAGCACTCGTTCCTTTCGA	107
RBP_lib_748	ACCGGCCAACATACCtatcttgtggaaaggacgaaacaccggCCGGGTCTCTTCTTCAGTCAGTTTAAGAGCTATGCTGGAAACAGCATAGCACTCGTTCCTTTCGA	107
RBP_lib_749	ACCGGCCAACATACCtatcttgtggaaaggacgaaacaccggCCGACGGCACGTACTGTTTCGTTTAAGAGCTATGCTGGAAACAGCATAGCACTCGTTCCTTTCGA	107
RBP_lib_750	ACCGGCCAACATACCtatcttgtggaaaggacgaaacaccggGTCTGTCCACTAGGAGTTGAGTTTAAGAGCTATGCTGGAAACAGCATAGCACTCGTTCCTTTCGA	107
RBP_lib_751	ACCGGCCAACATACCtatcttgtggaaaggacgaaacaccggGGAGACAAGCTCGTGTCGCTGTTTAAGAGCTATGCTGGAAACAGCATAGCACTCGTTCCTTTCGA	107
RBP_lib_752	ACCGGCCAACATACCtatcttgtggaaaggacgaaacaccggGAGCTTGTCTCCGGAGATGTGTTTAAGAGCTATGCTGGAAACAGCATAGCACTCGTTCCTTTCGA	107
RBP_lib_753	ACCGGCCAACATACCtatcttgtggaaaggacgaaacaccggCGGAAACAGTACGTGCCGTCGTTTAAGAGCTATGCTGGAAACAGCATAGCACTCGTTCCTTTCGA	107
RBP_lib_754	ACCGGCCAACATACCtatcttgtggaaaggacgaaacaccggAGAGAACCTTCAACTCCTAGGTTTAAGAGCTATGCTGGAAACAGCATAGCACTCGTTCCTTTCGA	107
RBP_lib_755	ACCGGCCAACATACCtatcttgtggaaaggacgaaacaccggGATCTTCTCAAACATGACCCGTTTAAGAGCTATGCTGGAAACAGCATAGCACTCGTTCCTTTCGA	107
RBP_lib_756	ACCGGCCAACATACCtatcttgtggaaaggacgaaacaccggTAGGCGTATCCCTGGGCGCCGTTTAAGAGCTATGCTGGAAACAGCATAGCACTCGTTCCTTTCGA	107
RBP_lib_757	ACCGGCCAACATACCtatcttgtggaaaggacgaaacaccggCCGCAACAGCCTGGCGCCCAGTTTAAGAGCTATGCTGGAAACAGCATAGCACTCGTTCCTTTCGA	107
RBP_lib_758	ACCGGCCAACATACCtatcttgtggaaaggacgaaacaccggCCCGCAACAGCCTGGCGCCCGTTTAAGAGCTATGCTGGAAACAGCATAGCACTCGTTCCTTTCGA	107
RBP_lib_759	ACCGGCCAACATACCtatcttgtggaaaggacgaaacaccggCTGGGCGCCAGGCTGTTGCGGTTTAAGAGCTATGCTGGAAACAGCATAGCACTCGTTCCTTTCGA	107
RBP_lib_760	ACCGGCCAACATACCtatcttgtggaaaggacgaaacaccggGGGGCGCGAGGTGTCAGCGAGTTTAAGAGCTATGCTGGAAACAGCATAGCACTCGTTCCTTTCGA	107
RBP_lib_761	ACCGGCCAACATACCtatcttgtggaaaggacgaaacaccggCGCCAGGCTGTTGCGGGGCGGTTTAAGAGCTATGCTGGAAACAGCATAGCACTCGTTCCTTTCGA	107
RBP_lib_762	ACCGGCCAACATACCtatcttgtggaaaggacgaaacaccggGCCAGGCTGTTGCGGGGCGTGTTTAAGAGCTATGCTGGAAACAGCATAGCACTCGTTCCTTTCGA	107
RBP_lib_763	ACCGGCCAACATACCtatcttgtggaaaggacgaaacaccggCCCTGGGCGCCAGGCTGTTGGTTTAAGAGCTATGCTGGAAACAGCATAGCACTCGTTCCTTTCGA	107
RBP_lib_764	ACCGGCCAACATACCtatcttgtggaaaggacgaaacaccggTCGCGCTTTCTCTTGAGTTGGTTTAAGAGCTATGCTGGAAACAGCATAGCACTCGTTCCTTTCGA	107
RBP_lib_765	ACCGGCCAACATACCtatcttgtggaaaggacgaaacaccggACTCAAGAGAAAGCGCGAACGTTTAAGAGCTATGCTGGAAACAGCATAGCACTCGTTCCTTTCGA	107
RBP_lib_766	ACCGGCCAACATACCtatcttgtggaaaggacgaaacaccggCCGGAGAACGGTAAGCGGACGTTTAAGAGCTATGCTGGAAACAGCATAGCACTCGTTCCTTTCGA	107
RBP_lib_767	ACCGGCCAACATACCtatcttgtggaaaggacgaaacaccggCGGAGAACGGTAAGCGGACAGTTTAAGAGCTATGCTGGAAACAGCATAGCACTCGTTCCTTTCGA	107
RBP_lib_768	ACCGGCCAACATACCtatcttgtggaaaggacgaaacaccggCAAGAGAAAGCGCGAACAGGGTTTAAGAGCTATGCTGGAAACAGCATAGCACTCGTTCCTTTCGA	107
RBP_lib_769	ACCGGCCAACATACCtatcttgtggaaaggacgaaacaccggCCTGTCCGCTTACCGTTCTCGTTTAAGAGCTATGCTGGAAACAGCATAGCACTCGTTCCTTTCGA	107
RBP_lib_770	ACCGGCCAACATACCtatcttgtggaaaggacgaaacaccggCGGTAAGCGGACAGGGGCAGGTTTAAGAGCTATGCTGGAAACAGCATAGCACTCGTTCCTTTCGA	107
RBP_lib_771	ACCGGCCAACATACCtatcttgtggaaaggacgaaacaccggTAAAGCCGGAGAACGGTAAGGTTTAAGAGCTATGCTGGAAACAGCATAGCACTCGTTCCTTTCGA	107
RBP_lib_772	ACCGGCCAACATACCtatcttgtggaaaggacgaaacaccggTCGACCACACCTATGATAGTGTTTAAGAGCTATGCTGGAAACAGCATAGCACTCGTTCCTTTCGA	107
RBP_lib_773	ACCGGCCAACATACCtatcttgtggaaaggacgaaacaccggAAAATAGCCTATCTAGGCTGGTTTAAGAGCTATGCTGGAAACAGCATAGCACTCGTTCCTTTCGA	107
RBP_lib_774	ACCGGCCAACATACCtatcttgtggaaaggacgaaacaccggAGCATCAGAGAAAATTCGTTGTTTAAGAGCTATGCTGGAAACAGCATAGCACTCGTTCCTTTCGA	107
RBP_lib_775	ACCGGCCAACATACCtatcttgtggaaaggacgaaacaccggAGAGAAAATTCGTTAGGCTCGTTTAAGAGCTATGCTGGAAACAGCATAGCACTCGTTCCTTTCGA	107
RBP_lib_776	ACCGGCCAACATACCtatcttgtggaaaggacgaaacaccggGACAGACATCCAACTATCATGTTTAAGAGCTATGCTGGAAACAGCATAGCACTCGTTCCTTTCGA	107
RBP_lib_777	ACCGGCCAACATACCtatcttgtggaaaggacgaaacaccggCTATCTAGGCTGGGGATACCGTTTAAGAGCTATGCTGGAAACAGCATAGCACTCGTTCCTTTCGA	107
RBP_lib_778	ACCGGCCAACATACCtatcttgtggaaaggacgaaacaccggCTGGTATCCCCAGCCTAGATGTTTAAGAGCTATGCTGGAAACAGCATAGCACTCGTTCCTTTCGA	107
RBP_lib_779	ACCGGCCAACATACCtatcttgtggaaaggacgaaacaccggTCCTGCAGACATCCGAGTATGTTTAAGAGCTATGCTGGAAACAGCATAGCACTCGTTCCTTTCGA	107
RBP_lib_780	ACCGGCCAACATACCtatcttgtggaaaggacgaaacaccggCCCGTGCAGTGCTCGACGTCGTTTAAGAGCTATGCTGGAAACAGCATAGCACTCGTTCCTTTCGA	107
RBP_lib_781	ACCGGCCAACATACCtatcttgtggaaaggacgaaacaccggAGTGCTCGACGTCCGGCTTCGTTTAAGAGCTATGCTGGAAACAGCATAGCACTCGTTCCTTTCGA	107
RBP_lib_782	ACCGGCCAACATACCtatcttgtggaaaggacgaaacaccggGCCGGACGTCGAGCACTGCAGTTTAAGAGCTATGCTGGAAACAGCATAGCACTCGTTCCTTTCGA	107
RBP_lib_783	ACCGGCCAACATACCtatcttgtggaaaggacgaaacaccggCGTCGAGCACTGCACGGGCGGTTTAAGAGCTATGCTGGAAACAGCATAGCACTCGTTCCTTTCGA	107
RBP_lib_784	ACCGGCCAACATACCtatcttgtggaaaggacgaaacaccggGTCGAGCACTGCACGGGCGCGTTTAAGAGCTATGCTGGAAACAGCATAGCACTCGTTCCTTTCGA	107
RBP_lib_785	ACCGGCCAACATACCtatcttgtggaaaggacgaaacaccggCCGGACGTCGAGCACTGCACGTTTAAGAGCTATGCTGGAAACAGCATAGCACTCGTTCCTTTCGA	107
RBP_lib_786	ACCGGCCAACATACCtatcttgtggaaaggacgaaacaccggCACCGGCAGCCCGCTGGAGGGTTTAAGAGCTATGCTGGAAACAGCATAGCACTCGTTCCTTTCGA	107
RBP_lib_787	ACCGGCCAACATACCtatcttgtggaaaggacgaaacaccggGTCCGCACACTGTTTGTCAGGTTTAAGAGCTATGCTGGAAACAGCATAGCACTCGTTCCTTTCGA	107
RBP_lib_788	ACCGGCCAACATACCtatcttgtggaaaggacgaaacaccggATATCGGTGTACTCCGAAAAGTTTAAGAGCTATGCTGGAAACAGCATAGCACTCGTTCCTTTCGA	107
RBP_lib_789	ACCGGCCAACATACCtatcttgtggaaaggacgaaacaccggTCTGCGGTGCCAACGACGCCGTTTAAGAGCTATGCTGGAAACAGCATAGCACTCGTTCCTTTCGA	107
RBP_lib_790	ACCGGCCAACATACCtatcttgtggaaaggacgaaacaccggTTTGGAAATATGTGTCGTGGGTTTAAGAGCTATGCTGGAAACAGCATAGCACTCGTTCCTTTCGA	107
RBP_lib_791	ACCGGCCAACATACCtatcttgtggaaaggacgaaacaccggGCCCTATGCCGTCAGTGAATGTTTAAGAGCTATGCTGGAAACAGCATAGCACTCGTTCCTTTCGA	107
RBP_lib_792	ACCGGCCAACATACCtatcttgtggaaaggacgaaacaccggACATATTTCCAAAGGCACCCGTTTAAGAGCTATGCTGGAAACAGCATAGCACTCGTTCCTTTCGA	107
RBP_lib_793	ACCGGCCAACATACCtatcttgtggaaaggacgaaacaccggCTTTGGAAATATGTGTCGTGGTTTAAGAGCTATGCTGGAAACAGCATAGCACTCGTTCCTTTCGA	107
RBP_lib_794	ACCGGCCAACATACCtatcttgtggaaaggacgaaacaccggGCCTTTGGAAATATGTGTCGGTTTAAGAGCTATGCTGGAAACAGCATAGCACTCGTTCCTTTCGA	107
RBP_lib_795	ACCGGCCAACATACCtatcttgtggaaaggacgaaacaccggTGTTTGCACCAACCAAAACCGTTTAAGAGCTATGCTGGAAACAGCATAGCACTCGTTCCTTTCGA	107
RBP_lib_796	ACCGGCCAACATACCtatcttgtggaaaggacgaaacaccggAGAATCGCAAAGGCTTTCGCGTTTAAGAGCTATGCTGGAAACAGCATAGCACTCGTTCCTTTCGA	107
RBP_lib_797	ACCGGCCAACATACCtatcttgtggaaaggacgaaacaccggAACGCCAGGCGGATCTCAGAGTTTAAGAGCTATGCTGGAAACAGCATAGCACTCGTTCCTTTCGA	107
RBP_lib_798	ACCGGCCAACATACCtatcttgtggaaaggacgaaacaccggATGGCCGACAAAACGCCAGGGTTTAAGAGCTATGCTGGAAACAGCATAGCACTCGTTCCTTTCGA	107
RBP_lib_799	ACCGGCCAACATACCtatcttgtggaaaggacgaaacaccggGTGAAAACGTTTGTTCGAGGGTTTAAGAGCTATGCTGGAAACAGCATAGCACTCGTTCCTTTCGA	107
RBP_lib_800	ACCGGCCAACATACCtatcttgtggaaaggacgaaacaccggGGCAGCGGCCGAAATTTATGGTTTAAGAGCTATGCTGGAAACAGCATAGCACTCGTTCCTTTCGA	107
RBP_lib_801	ACCGGCCAACATACCtatcttgtggaaaggacgaaacaccggGAAAACGTTTGTTCGAGGCGGTTTAAGAGCTATGCTGGAAACAGCATAGCACTCGTTCCTTTCGA	107
RBP_lib_802	ACCGGCCAACATACCtatcttgtggaaaggacgaaacaccggCTTGGCATATCACTATCTGAGTTTAAGAGCTATGCTGGAAACAGCATAGCACTCGTTCCTTTCGA	107
RBP_lib_803	ACCGGCCAACATACCtatcttgtggaaaggacgaaacaccggTGAAAACGTTTGTTCGAGGCGTTTAAGAGCTATGCTGGAAACAGCATAGCACTCGTTCCTTTCGA	107
RBP_lib_804	ACCGGCCAACATACCtatcttgtggaaaggacgaaacaccggTCATTAGCCTACGTCTTGCCGTTTAAGAGCTATGCTGGAAACAGCATAGCACTCGTTCCTTTCGA	107
RBP_lib_805	ACCGGCCAACATACCtatcttgtggaaaggacgaaacaccggCATTAGCCTACGTCTTGCCTGTTTAAGAGCTATGCTGGAAACAGCATAGCACTCGTTCCTTTCGA	107
RBP_lib_806	ACCGGCCAACATACCtatcttgtggaaaggacgaaacaccggGCAAGACGTAGGCTAATGAGGTTTAAGAGCTATGCTGGAAACAGCATAGCACTCGTTCCTTTCGA	107
RBP_lib_807	ACCGGCCAACATACCtatcttgtggaaaggacgaaacaccggTGTACGCAACCTTGCCAACAGTTTAAGAGCTATGCTGGAAACAGCATAGCACTCGTTCCTTTCGA	107
RBP_lib_808	ACCGGCCAACATACCtatcttgtggaaaggacgaaacaccggCTTCTGTTACCGTGTTGGCAGTTTAAGAGCTATGCTGGAAACAGCATAGCACTCGTTCCTTTCGA	107
RBP_lib_809	ACCGGCCAACATACCtatcttgtggaaaggacgaaacaccggAATATCTCAGTGCCAACAGAGTTTAAGAGCTATGCTGGAAACAGCATAGCACTCGTTCCTTTCGA	107
RBP_lib_810	ACCGGCCAACATACCtatcttgtggaaaggacgaaacaccggCTCCCCCAACAAGAGGTCGAGTTTAAGAGCTATGCTGGAAACAGCATAGCACTCGTTCCTTTCGA	107
RBP_lib_811	ACCGGCCAACATACCtatcttgtggaaaggacgaaacaccggCACGCCCTCGACCTCTTGTTGTTTAAGAGCTATGCTGGAAACAGCATAGCACTCGTTCCTTTCGA	107
RBP_lib_812	ACCGGCCAACATACCtatcttgtggaaaggacgaaacaccggTCGCTGTGGAGGTTCCAATTGTTTAAGAGCTATGCTGGAAACAGCATAGCACTCGTTCCTTTCGA	107
RBP_lib_813	ACCGGCCAACATACCtatcttgtggaaaggacgaaacaccggGTGCTCGCCGAGAGCCCAATGTTTAAGAGCTATGCTGGAAACAGCATAGCACTCGTTCCTTTCGA	107
RBP_lib_814	ACCGGCCAACATACCtatcttgtggaaaggacgaaacaccggGAACACCGTTGTCGCTGTGGGTTTAAGAGCTATGCTGGAAACAGCATAGCACTCGTTCCTTTCGA	107
RBP_lib_815	ACCGGCCAACATACCtatcttgtggaaaggacgaaacaccggAATTGGGCTCTCGGCGAGCAGTTTAAGAGCTATGCTGGAAACAGCATAGCACTCGTTCCTTTCGA	107
RBP_lib_816	ACCGGCCAACATACCtatcttgtggaaaggacgaaacaccggTCAGAACACCGTTGTCGCTGGTTTAAGAGCTATGCTGGAAACAGCATAGCACTCGTTCCTTTCGA	107
RBP_lib_817	ACCGGCCAACATACCtatcttgtggaaaggacgaaacaccggCGCGTCGCGAGCAGAGCATCGTTTAAGAGCTATGCTGGAAACAGCATAGCACTCGTTCCTTTCGA	107
RBP_lib_818	ACCGGCCAACATACCtatcttgtggaaaggacgaaacaccggCCGATGCTCTGCTCGCGACGGTTTAAGAGCTATGCTGGAAACAGCATAGCACTCGTTCCTTTCGA	107
RBP_lib_819	ACCGGCCAACATACCtatcttgtggaaaggacgaaacaccggGAGCACGGCGGGTCTGTACTGTTTAAGAGCTATGCTGGAAACAGCATAGCACTCGTTCCTTTCGA	107
RBP_lib_820	ACCGGCCAACATACCtatcttgtggaaaggacgaaacaccggGCTGACAGGACCGTGTTTGTGTTTAAGAGCTATGCTGGAAACAGCATAGCACTCGTTCCTTTCGA	107
RBP_lib_821	ACCGGCCAACATACCtatcttgtggaaaggacgaaacaccggGCAATTTAGAGGCCCGAGTGGTTTAAGAGCTATGCTGGAAACAGCATAGCACTCGTTCCTTTCGA	107
RBP_lib_822	ACCGGCCAACATACCtatcttgtggaaaggacgaaacaccggCAATTTAGAGGCCCGAGTGCGTTTAAGAGCTATGCTGGAAACAGCATAGCACTCGTTCCTTTCGA	107
RBP_lib_823	ACCGGCCAACATACCtatcttgtggaaaggacgaaacaccggTCTTTACGAGCTGTTCCTTCGTTTAAGAGCTATGCTGGAAACAGCATAGCACTCGTTCCTTTCGA	107
RBP_lib_824	ACCGGCCAACATACCtatcttgtggaaaggacgaaacaccggGACGGAAAGCCGAAGTCCTTGTTTAAGAGCTATGCTGGAAACAGCATAGCACTCGTTCCTTTCGA	107
RBP_lib_825	ACCGGCCAACATACCtatcttgtggaaaggacgaaacaccggCGTGTTTGTGGGCAATTTAGGTTTAAGAGCTATGCTGGAAACAGCATAGCACTCGTTCCTTTCGA	107
RBP_lib_826	ACCGGCCAACATACCtatcttgtggaaaggacgaaacaccggGGCTGACAGGACCGTGTTTGGTTTAAGAGCTATGCTGGAAACAGCATAGCACTCGTTCCTTTCGA	107
RBP_lib_827	ACCGGCCAACATACCtatcttgtggaaaggacgaaacaccggATGGCATAGGATACGGACTCGTTTAAGAGCTATGCTGGAAACAGCATAGCACTCGTTCCTTTCGA	107
RBP_lib_828	ACCGGCCAACATACCtatcttgtggaaaggacgaaacaccggCGACGACTTTGATGACGTTGGTTTAAGAGCTATGCTGGAAACAGCATAGCACTCGTTCCTTTCGA	107
RBP_lib_829	ACCGGCCAACATACCtatcttgtggaaaggacgaaacaccggGGACGAAGGACTTGACGACTGTTTAAGAGCTATGCTGGAAACAGCATAGCACTCGTTCCTTTCGA	107
RBP_lib_830	ACCGGCCAACATACCtatcttgtggaaaggacgaaacaccggCCCATCTGGTGAGCGACCACGTTTAAGAGCTATGCTGGAAACAGCATAGCACTCGTTCCTTTCGA	107
RBP_lib_831	ACCGGCCAACATACCtatcttgtggaaaggacgaaacaccggCGACTTTGATGACGTTGAGGGTTTAAGAGCTATGCTGGAAACAGCATAGCACTCGTTCCTTTCGA	107
RBP_lib_832	ACCGGCCAACATACCtatcttgtggaaaggacgaaacaccggAATGTCGAGATTCTCCCATCGTTTAAGAGCTATGCTGGAAACAGCATAGCACTCGTTCCTTTCGA	107
RBP_lib_833	ACCGGCCAACATACCtatcttgtggaaaggacgaaacaccggGCCTGTGGTCGCTCACCAGAGTTTAAGAGCTATGCTGGAAACAGCATAGCACTCGTTCCTTTCGA	107
RBP_lib_834	ACCGGCCAACATACCtatcttgtggaaaggacgaaacaccggCCTGTGGTCGCTCACCAGATGTTTAAGAGCTATGCTGGAAACAGCATAGCACTCGTTCCTTTCGA	107
RBP_lib_835	ACCGGCCAACATACCtatcttgtggaaaggacgaaacaccggCGCTCATACTTGGTCATGTAGTTTAAGAGCTATGCTGGAAACAGCATAGCACTCGTTCCTTTCGA	107
RBP_lib_836	ACCGGCCAACATACCtatcttgtggaaaggacgaaacaccggCGCAGCCGATGTCATCCCGCGTTTAAGAGCTATGCTGGAAACAGCATAGCACTCGTTCCTTTCGA	107
RBP_lib_837	ACCGGCCAACATACCtatcttgtggaaaggacgaaacaccggTTGAAGAAGACCCGCGCGGGGTTTAAGAGCTATGCTGGAAACAGCATAGCACTCGTTCCTTTCGA	107
RBP_lib_838	ACCGGCCAACATACCtatcttgtggaaaggacgaaacaccggTCTTCACCACGCCGCCCGCGGTTTAAGAGCTATGCTGGAAACAGCATAGCACTCGTTCCTTTCGA	107
RBP_lib_839	ACCGGCCAACATACCtatcttgtggaaaggacgaaacaccggTGACATCGGCTGCGGCGCGCGTTTAAGAGCTATGCTGGAAACAGCATAGCACTCGTTCCTTTCGA	107
RBP_lib_840	ACCGGCCAACATACCtatcttgtggaaaggacgaaacaccggCACTACCTGCGGGATGACATGTTTAAGAGCTATGCTGGAAACAGCATAGCACTCGTTCCTTTCGA	107
RBP_lib_841	ACCGGCCAACATACCtatcttgtggaaaggacgaaacaccggGTTCTTGAAGAAGACCCGCGGTTTAAGAGCTATGCTGGAAACAGCATAGCACTCGTTCCTTTCGA	107
RBP_lib_842	ACCGGCCAACATACCtatcttgtggaaaggacgaaacaccggTTCTTGAAGAAGACCCGCGCGTTTAAGAGCTATGCTGGAAACAGCATAGCACTCGTTCCTTTCGA	107
RBP_lib_843	ACCGGCCAACATACCtatcttgtggaaaggacgaaacaccggGGTAGTGCGGCCACGGGCAGGTTTAAGAGCTATGCTGGAAACAGCATAGCACTCGTTCCTTTCGA	107
RBP_lib_844	ACCGGCCAACATACCtatcttgtggaaaggacgaaacaccggATTCACATTTACCCGCCGGCGTTTAAGAGCTATGCTGGAAACAGCATAGCACTCGTTCCTTTCGA	107
RBP_lib_845	ACCGGCCAACATACCtatcttgtggaaaggacgaaacaccggCGGCGGGTAAATGTGAATGTGTTTAAGAGCTATGCTGGAAACAGCATAGCACTCGTTCCTTTCGA	107
RBP_lib_846	ACCGGCCAACATACCtatcttgtggaaaggacgaaacaccggCCGGCGGGTAAATGTGAATGGTTTAAGAGCTATGCTGGAAACAGCATAGCACTCGTTCCTTTCGA	107
RBP_lib_847	ACCGGCCAACATACCtatcttgtggaaaggacgaaacaccggCCACATTCACATTTACCCGCGTTTAAGAGCTATGCTGGAAACAGCATAGCACTCGTTCCTTTCGA	107
RBP_lib_848	ACCGGCCAACATACCtatcttgtggaaaggacgaaacaccggCGAGCGTTATGCCGCGCTCGGTTTAAGAGCTATGCTGGAAACAGCATAGCACTCGTTCCTTTCGA	107
RBP_lib_849	ACCGGCCAACATACCtatcttgtggaaaggacgaaacaccggCGCGGCATAACGCTCGACCTGTTTAAGAGCTATGCTGGAAACAGCATAGCACTCGTTCCTTTCGA	107
RBP_lib_850	ACCGGCCAACATACCtatcttgtggaaaggacgaaacaccggGCGCGGCATAACGCTCGACCGTTTAAGAGCTATGCTGGAAACAGCATAGCACTCGTTCCTTTCGA	107
RBP_lib_851	ACCGGCCAACATACCtatcttgtggaaaggacgaaacaccggATGCCGCGCTCGCGGCTCTGGTTTAAGAGCTATGCTGGAAACAGCATAGCACTCGTTCCTTTCGA	107
RBP_lib_852	ACCGGCCAACATACCtatcttgtggaaaggacgaaacaccggGATGCCAGTGGCCCGCTGTAGTTTAAGAGCTATGCTGGAAACAGCATAGCACTCGTTCCTTTCGA	107
RBP_lib_853	ACCGGCCAACATACCtatcttgtggaaaggacgaaacaccggTCCGGTCACTTATGGCGTTTGTTTAAGAGCTATGCTGGAAACAGCATAGCACTCGTTCCTTTCGA	107
RBP_lib_854	ACCGGCCAACATACCtatcttgtggaaaggacgaaacaccggCTGACCTTACAGCGGGCCACGTTTAAGAGCTATGCTGGAAACAGCATAGCACTCGTTCCTTTCGA	107
RBP_lib_855	ACCGGCCAACATACCtatcttgtggaaaggacgaaacaccggCTTATGGCGTTTAGGCTAACGTTTAAGAGCTATGCTGGAAACAGCATAGCACTCGTTCCTTTCGA	107
RBP_lib_856	ACCGGCCAACATACCtatcttgtggaaaggacgaaacaccggATGGCGTTTAGGCTAACAGGGTTTAAGAGCTATGCTGGAAACAGCATAGCACTCGTTCCTTTCGA	107
RBP_lib_857	ACCGGCCAACATACCtatcttgtggaaaggacgaaacaccggGTACAACCTGACCTTACAGCGTTTAAGAGCTATGCTGGAAACAGCATAGCACTCGTTCCTTTCGA	107
RBP_lib_858	ACCGGCCAACATACCtatcttgtggaaaggacgaaacaccggGGATGTCGCCGTATTGTTCCGTTTAAGAGCTATGCTGGAAACAGCATAGCACTCGTTCCTTTCGA	107
RBP_lib_859	ACCGGCCAACATACCtatcttgtggaaaggacgaaacaccggGCCTAAACGCCATAAGTGACGTTTAAGAGCTATGCTGGAAACAGCATAGCACTCGTTCCTTTCGA	107
RBP_lib_860	ACCGGCCAACATACCtatcttgtggaaaggacgaaacaccggGGGTGTAGGTGCCGCTGCCGGTTTAAGAGCTATGCTGGAAACAGCATAGCACTCGTTCCTTTCGA	107
RBP_lib_861	ACCGGCCAACATACCtatcttgtggaaaggacgaaacaccggAGCGGCACCTACACCCGGCAGTTTAAGAGCTATGCTGGAAACAGCATAGCACTCGTTCCTTTCGA	107
RBP_lib_862	ACCGGCCAACATACCtatcttgtggaaaggacgaaacaccggCCGGGTGTAGGTGCCGCTGCGTTTAAGAGCTATGCTGGAAACAGCATAGCACTCGTTCCTTTCGA	107
RBP_lib_863	ACCGGCCAACATACCtatcttgtggaaaggacgaaacaccggCCGGCAGCGGCACCTACACCGTTTAAGAGCTATGCTGGAAACAGCATAGCACTCGTTCCTTTCGA	107
RBP_lib_864	ACCGGCCAACATACCtatcttgtggaaaggacgaaacaccggCCGGGGATGCAGTACCTCACGTTTAAGAGCTATGCTGGAAACAGCATAGCACTCGTTCCTTTCGA	107
RBP_lib_865	ACCGGCCAACATACCtatcttgtggaaaggacgaaacaccggGGGATGCAGTACCTCACCGGGTTTAAGAGCTATGCTGGAAACAGCATAGCACTCGTTCCTTTCGA	107
RBP_lib_866	ACCGGCCAACATACCtatcttgtggaaaggacgaaacaccggCGGGTGTAGGTGCCGCTGCCGTTTAAGAGCTATGCTGGAAACAGCATAGCACTCGTTCCTTTCGA	107
RBP_lib_867	ACCGGCCAACATACCtatcttgtggaaaggacgaaacaccggGATGTAGCCATGCCGGGTGTGTTTAAGAGCTATGCTGGAAACAGCATAGCACTCGTTCCTTTCGA	107
RBP_lib_868	ACCGGCCAACATACCtatcttgtggaaaggacgaaacaccggGTCTCGGTCCTCGTTGAAGCGTTTAAGAGCTATGCTGGAAACAGCATAGCACTCGTTCCTTTCGA	107
RBP_lib_869	ACCGGCCAACATACCtatcttgtggaaaggacgaaacaccggCGATTCTATGGGCTTGTCAAGTTTAAGAGCTATGCTGGAAACAGCATAGCACTCGTTCCTTTCGA	107
RBP_lib_870	ACCGGCCAACATACCtatcttgtggaaaggacgaaacaccggCAACGAGGACCGAGACTTTCGTTTAAGAGCTATGCTGGAAACAGCATAGCACTCGTTCCTTTCGA	107
RBP_lib_871	ACCGGCCAACATACCtatcttgtggaaaggacgaaacaccggCCGATTCTATGGGCTTGTCAGTTTAAGAGCTATGCTGGAAACAGCATAGCACTCGTTCCTTTCGA	107
RBP_lib_872	ACCGGCCAACATACCtatcttgtggaaaggacgaaacaccggTTCTAGGACACGACGCCGTTGTTTAAGAGCTATGCTGGAAACAGCATAGCACTCGTTCCTTTCGA	107
RBP_lib_873	ACCGGCCAACATACCtatcttgtggaaaggacgaaacaccggAGTCTCGGTCCTCGTTGAAGGTTTAAGAGCTATGCTGGAAACAGCATAGCACTCGTTCCTTTCGA	107
RBP_lib_874	ACCGGCCAACATACCtatcttgtggaaaggacgaaacaccggCCGCTTCTCCCGCTTCAACGGTTTAAGAGCTATGCTGGAAACAGCATAGCACTCGTTCCTTTCGA	107
RBP_lib_875	ACCGGCCAACATACCtatcttgtggaaaggacgaaacaccggATGCCGAGGATGCTACCGAAGTTTAAGAGCTATGCTGGAAACAGCATAGCACTCGTTCCTTTCGA	107
RBP_lib_876	ACCGGCCAACATACCtatcttgtggaaaggacgaaacaccggAGTGGGGAGCCTAATACTGCGTTTAAGAGCTATGCTGGAAACAGCATAGCACTCGTTCCTTTCGA	107
RBP_lib_877	ACCGGCCAACATACCtatcttgtggaaaggacgaaacaccggGGTCCAAGTCACCTACATACGTTTAAGAGCTATGCTGGAAACAGCATAGCACTCGTTCCTTTCGA	107
RBP_lib_878	ACCGGCCAACATACCtatcttgtggaaaggacgaaacaccggACCCGCAGCCCCCTGGGTTAGTTTAAGAGCTATGCTGGAAACAGCATAGCACTCGTTCCTTTCGA	107
RBP_lib_879	ACCGGCCAACATACCtatcttgtggaaaggacgaaacaccggGTCCAAGTCACCTACATACAGTTTAAGAGCTATGCTGGAAACAGCATAGCACTCGTTCCTTTCGA	107
RBP_lib_880	ACCGGCCAACATACCtatcttgtggaaaggacgaaacaccggCTTGGACCCTGACGTCACAGGTTTAAGAGCTATGCTGGAAACAGCATAGCACTCGTTCCTTTCGA	107
RBP_lib_881	ACCGGCCAACATACCtatcttgtggaaaggacgaaacaccggTGCCCTGTATGTAGGTGACTGTTTAAGAGCTATGCTGGAAACAGCATAGCACTCGTTCCTTTCGA	107
RBP_lib_882	ACCGGCCAACATACCtatcttgtggaaaggacgaaacaccggAGATTCTAGTGAAGCGCAGAGTTTAAGAGCTATGCTGGAAACAGCATAGCACTCGTTCCTTTCGA	107
RBP_lib_883	ACCGGCCAACATACCtatcttgtggaaaggacgaaacaccggCAGATTCTAGTGAAGCGCAGGTTTAAGAGCTATGCTGGAAACAGCATAGCACTCGTTCCTTTCGA	107
RBP_lib_884	ACCGGCCAACATACCtatcttgtggaaaggacgaaacaccggGGCGACACGGATCTGCACCGGTTTAAGAGCTATGCTGGAAACAGCATAGCACTCGTTCCTTTCGA	107
RBP_lib_885	ACCGGCCAACATACCtatcttgtggaaaggacgaaacaccggGCAGAGTCTGTTCGCCGAGCGTTTAAGAGCTATGCTGGAAACAGCATAGCACTCGTTCCTTTCGA	107
RBP_lib_886	ACCGGCCAACATACCtatcttgtggaaaggacgaaacaccggGATCCGTGTCGCCATCCAGGGTTTAAGAGCTATGCTGGAAACAGCATAGCACTCGTTCCTTTCGA	107
RBP_lib_887	ACCGGCCAACATACCtatcttgtggaaaggacgaaacaccggGCAGATCCGTGTCGCCATCCGTTTAAGAGCTATGCTGGAAACAGCATAGCACTCGTTCCTTTCGA	107
RBP_lib_888	ACCGGCCAACATACCtatcttgtggaaaggacgaaacaccggCTCGGCGAACAGACTCTGCCGTTTAAGAGCTATGCTGGAAACAGCATAGCACTCGTTCCTTTCGA	107
RBP_lib_889	ACCGGCCAACATACCtatcttgtggaaaggacgaaacaccggTCGGCGAACAGACTCTGCCTGTTTAAGAGCTATGCTGGAAACAGCATAGCACTCGTTCCTTTCGA	107
RBP_lib_890	ACCGGCCAACATACCtatcttgtggaaaggacgaaacaccggCGGATCTGCACCGTGGTCTCGTTTAAGAGCTATGCTGGAAACAGCATAGCACTCGTTCCTTTCGA	107
RBP_lib_891	ACCGGCCAACATACCtatcttgtggaaaggacgaaacaccggGTTCTCGCCCCCACTTGTCGGTTTAAGAGCTATGCTGGAAACAGCATAGCACTCGTTCCTTTCGA	107
RBP_lib_892	ACCGGCCAACATACCtatcttgtggaaaggacgaaacaccggGTGGTGGCACCAACAGATAAGTTTAAGAGCTATGCTGGAAACAGCATAGCACTCGTTCCTTTCGA	107
RBP_lib_893	ACCGGCCAACATACCtatcttgtggaaaggacgaaacaccggACCGTGCAATGGTGTCGCTGGTTTAAGAGCTATGCTGGAAACAGCATAGCACTCGTTCCTTTCGA	107
RBP_lib_894	ACCGGCCAACATACCtatcttgtggaaaggacgaaacaccggCCGTGCAATGGTGTCGCTGAGTTTAAGAGCTATGCTGGAAACAGCATAGCACTCGTTCCTTTCGA	107
RBP_lib_895	ACCGGCCAACATACCtatcttgtggaaaggacgaaacaccggAGAAGTATCTACAGTGCCACGTTTAAGAGCTATGCTGGAAACAGCATAGCACTCGTTCCTTTCGA	107
RBP_lib_896	ACCGGCCAACATACCtatcttgtggaaaggacgaaacaccggAGGAAGCAGCTCGACCGCCTGTTTAAGAGCTATGCTGGAAACAGCATAGCACTCGTTCCTTTCGA	107
RBP_lib_897	ACCGGCCAACATACCtatcttgtggaaaggacgaaacaccggACGCTTGCTCCTTTATCTGTGTTTAAGAGCTATGCTGGAAACAGCATAGCACTCGTTCCTTTCGA	107
RBP_lib_898	ACCGGCCAACATACCtatcttgtggaaaggacgaaacaccggGAAGTATCTACAGTGCCACCGTTTAAGAGCTATGCTGGAAACAGCATAGCACTCGTTCCTTTCGA	107
RBP_lib_899	ACCGGCCAACATACCtatcttgtggaaaggacgaaacaccggTGCCACCGGGAAGTGGACAAGTTTAAGAGCTATGCTGGAAACAGCATAGCACTCGTTCCTTTCGA	107
RBP_lib_900	ACCGGCCAACATACCtatcttgtggaaaggacgaaacaccggTACTCTGGGCATAATGGACTGTTTAAGAGCTATGCTGGAAACAGCATAGCACTCGTTCCTTTCGA	107
RBP_lib_901	ACCGGCCAACATACCtatcttgtggaaaggacgaaacaccggACGATTAAGTTCTTCTGATTGTTTAAGAGCTATGCTGGAAACAGCATAGCACTCGTTCCTTTCGA	107
RBP_lib_902	ACCGGCCAACATACCtatcttgtggaaaggacgaaacaccggTGTTGGCATTATGTATACTCGTTTAAGAGCTATGCTGGAAACAGCATAGCACTCGTTCCTTTCGA	107
RBP_lib_903	ACCGGCCAACATACCtatcttgtggaaaggacgaaacaccggAATCGTCCTTTCAGATAGTGGTTTAAGAGCTATGCTGGAAACAGCATAGCACTCGTTCCTTTCGA	107
RBP_lib_904	ACCGGCCAACATACCtatcttgtggaaaggacgaaacaccggTGAACTGAGTGTTGATAGTGGTTTAAGAGCTATGCTGGAAACAGCATAGCACTCGTTCCTTTCGA	107
RBP_lib_905	ACCGGCCAACATACCtatcttgtggaaaggacgaaacaccggGGATGACCTCACTATCTGAAGTTTAAGAGCTATGCTGGAAACAGCATAGCACTCGTTCCTTTCGA	107
RBP_lib_906	ACCGGCCAACATACCtatcttgtggaaaggacgaaacaccggTATGTATACTCTGGGCATAAGTTTAAGAGCTATGCTGGAAACAGCATAGCACTCGTTCCTTTCGA	107
RBP_lib_907	ACCGGCCAACATACCtatcttgtggaaaggacgaaacaccggCCGAGAGGTCATGATCATAGGTTTAAGAGCTATGCTGGAAACAGCATAGCACTCGTTCCTTTCGA	107
RBP_lib_908	ACCGGCCAACATACCtatcttgtggaaaggacgaaacaccggCCGATTCGTCGTCAAATAGCGTTTAAGAGCTATGCTGGAAACAGCATAGCACTCGTTCCTTTCGA	107
RBP_lib_909	ACCGGCCAACATACCtatcttgtggaaaggacgaaacaccggAAATAGCTGGTCGAATCGGTGTTTAAGAGCTATGCTGGAAACAGCATAGCACTCGTTCCTTTCGA	107
RBP_lib_910	ACCGGCCAACATACCtatcttgtggaaaggacgaaacaccggCCAGCTATTTGACGACGAATGTTTAAGAGCTATGCTGGAAACAGCATAGCACTCGTTCCTTTCGA	107
RBP_lib_911	ACCGGCCAACATACCtatcttgtggaaaggacgaaacaccggCGTCAAATAGCTGGTCGAATGTTTAAGAGCTATGCTGGAAACAGCATAGCACTCGTTCCTTTCGA	107
RBP_lib_912	ACCGGCCAACATACCtatcttgtggaaaggacgaaacaccggCGACGAATCGGACCCTTTCGGTTTAAGAGCTATGCTGGAAACAGCATAGCACTCGTTCCTTTCGA	107
RBP_lib_913	ACCGGCCAACATACCtatcttgtggaaaggacgaaacaccggGCTGCCTTCAGTACCTCGAAGTTTAAGAGCTATGCTGGAAACAGCATAGCACTCGTTCCTTTCGA	107
RBP_lib_914	ACCGGCCAACATACCtatcttgtggaaaggacgaaacaccggCCGCCGCGTTGGAGTTGGTCGTTTAAGAGCTATGCTGGAAACAGCATAGCACTCGTTCCTTTCGA	107
RBP_lib_915	ACCGGCCAACATACCtatcttgtggaaaggacgaaacaccggCAACTGTTTGCCCGCCGCGTGTTTAAGAGCTATGCTGGAAACAGCATAGCACTCGTTCCTTTCGA	107
RBP_lib_916	ACCGGCCAACATACCtatcttgtggaaaggacgaaacaccggGAATCTTGACTCGCTCTCGCGTTTAAGAGCTATGCTGGAAACAGCATAGCACTCGTTCCTTTCGA	107
RBP_lib_917	ACCGGCCAACATACCtatcttgtggaaaggacgaaacaccggTGTGAATCGGCACGGTCCTGGTTTAAGAGCTATGCTGGAAACAGCATAGCACTCGTTCCTTTCGA	107
RBP_lib_918	ACCGGCCAACATACCtatcttgtggaaaggacgaaacaccggTACATTGACGCAGACGTCAGGTTTAAGAGCTATGCTGGAAACAGCATAGCACTCGTTCCTTTCGA	107
RBP_lib_919	ACCGGCCAACATACCtatcttgtggaaaggacgaaacaccggGCTTGAGAACTTTACTCAGCGTTTAAGAGCTATGCTGGAAACAGCATAGCACTCGTTCCTTTCGA	107
RBP_lib_920	ACCGGCCAACATACCtatcttgtggaaaggacgaaacaccggTCTCAAGCTAAGTAAAGTACGTTTAAGAGCTATGCTGGAAACAGCATAGCACTCGTTCCTTTCGA	107
RBP_lib_921	ACCGGCCAACATACCtatcttgtggaaaggacgaaacaccggGGACCTCTATTGCTATATCTGTTTAAGAGCTATGCTGGAAACAGCATAGCACTCGTTCCTTTCGA	107
RBP_lib_922	ACCGGCCAACATACCtatcttgtggaaaggacgaaacaccggGAAGCTTCTGTTTAATAAACGTTTAAGAGCTATGCTGGAAACAGCATAGCACTCGTTCCTTTCGA	107
RBP_lib_923	ACCGGCCAACATACCtatcttgtggaaaggacgaaacaccggCTTGAGAACTTTACTCAGCTGTTTAAGAGCTATGCTGGAAACAGCATAGCACTCGTTCCTTTCGA	107
RBP_lib_924	ACCGGCCAACATACCtatcttgtggaaaggacgaaacaccggAGGTCCACAAAGCGCCCGCAGTTTAAGAGCTATGCTGGAAACAGCATAGCACTCGTTCCTTTCGA	107
RBP_lib_925	ACCGGCCAACATACCtatcttgtggaaaggacgaaacaccggCAGGTCCACAAAGCGCCCGCGTTTAAGAGCTATGCTGGAAACAGCATAGCACTCGTTCCTTTCGA	107
RBP_lib_926	ACCGGCCAACATACCtatcttgtggaaaggacgaaacaccggACGCCCCTGCGGGCGCTTTGGTTTAAGAGCTATGCTGGAAACAGCATAGCACTCGTTCCTTTCGA	107
RBP_lib_927	ACCGGCCAACATACCtatcttgtggaaaggacgaaacaccggAAAGCGCCCGCAGGGGCGTCGTTTAAGAGCTATGCTGGAAACAGCATAGCACTCGTTCCTTTCGA	107
RBP_lib_928	ACCGGCCAACATACCtatcttgtggaaaggacgaaacaccggGGTCCACAAAGCGCCCGCAGGTTTAAGAGCTATGCTGGAAACAGCATAGCACTCGTTCCTTTCGA	107
RBP_lib_929	ACCGGCCAACATACCtatcttgtggaaaggacgaaacaccggCCTCCGCGCCCCAGTCCGCTGTTTAAGAGCTATGCTGGAAACAGCATAGCACTCGTTCCTTTCGA	107
RBP_lib_930	ACCGGCCAACATACCtatcttgtggaaaggacgaaacaccggCAGGAAGACGCGCCACGATGGTTTAAGAGCTATGCTGGAAACAGCATAGCACTCGTTCCTTTCGA	107
RBP_lib_931	ACCGGCCAACATACCtatcttgtggaaaggacgaaacaccggAGGAAGACGCGCCACGATGTGTTTAAGAGCTATGCTGGAAACAGCATAGCACTCGTTCCTTTCGA	107
RBP_lib_932	ACCGGCCAACATACCtatcttgtggaaaggacgaaacaccggTCTGTTACACCCTTCCTTGGGTTTAAGAGCTATGCTGGAAACAGCATAGCACTCGTTCCTTTCGA	107
RBP_lib_933	ACCGGCCAACATACCtatcttgtggaaaggacgaaacaccggTTTCAGCCATGCACAGACTGGTTTAAGAGCTATGCTGGAAACAGCATAGCACTCGTTCCTTTCGA	107
RBP_lib_934	ACCGGCCAACATACCtatcttgtggaaaggacgaaacaccggAGATCTGTTACACCCTTCCTGTTTAAGAGCTATGCTGGAAACAGCATAGCACTCGTTCCTTTCGA	107
RBP_lib_935	ACCGGCCAACATACCtatcttgtggaaaggacgaaacaccggGTTACACCCTTCCTTGGAGGGTTTAAGAGCTATGCTGGAAACAGCATAGCACTCGTTCCTTTCGA	107
RBP_lib_936	ACCGGCCAACATACCtatcttgtggaaaggacgaaacaccggAAAGAACCACAGTCTGTGCAGTTTAAGAGCTATGCTGGAAACAGCATAGCACTCGTTCCTTTCGA	107
RBP_lib_937	ACCGGCCAACATACCtatcttgtggaaaggacgaaacaccggGCAATAATCCAAGATCAACTGTTTAAGAGCTATGCTGGAAACAGCATAGCACTCGTTCCTTTCGA	107
RBP_lib_938	ACCGGCCAACATACCtatcttgtggaaaggacgaaacaccggAGAAAAAACATAAGAAGAAAGTTTAAGAGCTATGCTGGAAACAGCATAGCACTCGTTCCTTTCGA	107
RBP_lib_939	ACCGGCCAACATACCtatcttgtggaaaggacgaaacaccggTAACTCTTCCAGTGAAAACAGTTTAAGAGCTATGCTGGAAACAGCATAGCACTCGTTCCTTTCGA	107
RBP_lib_940	ACCGGCCAACATACCtatcttgtggaaaggacgaaacaccggTACAAACAGCAACCCGAGCGGTTTAAGAGCTATGCTGGAAACAGCATAGCACTCGTTCCTTTCGA	107
RBP_lib_941	ACCGGCCAACATACCtatcttgtggaaaggacgaaacaccggTGCGCATTCTGGGGGTCCACGTTTAAGAGCTATGCTGGAAACAGCATAGCACTCGTTCCTTTCGA	107
RBP_lib_942	ACCGGCCAACATACCtatcttgtggaaaggacgaaacaccggACAAACAGCAACCCGAGCGTGTTTAAGAGCTATGCTGGAAACAGCATAGCACTCGTTCCTTTCGA	107
RBP_lib_943	ACCGGCCAACATACCtatcttgtggaaaggacgaaacaccggGCGCATTCTGGGGGTCCACCGTTTAAGAGCTATGCTGGAAACAGCATAGCACTCGTTCCTTTCGA	107
RBP_lib_944	ACCGGCCAACATACCtatcttgtggaaaggacgaaacaccggCAACCCGAGCGTGGGTGGGCGTTTAAGAGCTATGCTGGAAACAGCATAGCACTCGTTCCTTTCGA	107
RBP_lib_945	ACCGGCCAACATACCtatcttgtggaaaggacgaaacaccggAACAGCAACCCGAGCGTGGGGTTTAAGAGCTATGCTGGAAACAGCATAGCACTCGTTCCTTTCGA	107
RBP_lib_946	ACCGGCCAACATACCtatcttgtggaaaggacgaaacaccggAGAGCGCGAGGCATCACCACGTTTAAGAGCTATGCTGGAAACAGCATAGCACTCGTTCCTTTCGA	107
RBP_lib_947	ACCGGCCAACATACCtatcttgtggaaaggacgaaacaccggACAGCAACCCGAGCGTGGGTGTTTAAGAGCTATGCTGGAAACAGCATAGCACTCGTTCCTTTCGA	107
RBP_lib_948	ACCGGCCAACATACCtatcttgtggaaaggacgaaacaccggGCCGGAGATTGCACAAGCTGGTTTAAGAGCTATGCTGGAAACAGCATAGCACTCGTTCCTTTCGA	107
RBP_lib_949	ACCGGCCAACATACCtatcttgtggaaaggacgaaacaccggTCTATCCCATTGATCCTAGGGTTTAAGAGCTATGCTGGAAACAGCATAGCACTCGTTCCTTTCGA	107
RBP_lib_950	ACCGGCCAACATACCtatcttgtggaaaggacgaaacaccggTCATACACTATCTGGATAACGTTTAAGAGCTATGCTGGAAACAGCATAGCACTCGTTCCTTTCGA	107
RBP_lib_951	ACCGGCCAACATACCtatcttgtggaaaggacgaaacaccggCCCCTCCTCCTAGGATCAATGTTTAAGAGCTATGCTGGAAACAGCATAGCACTCGTTCCTTTCGA	107
RBP_lib_952	ACCGGCCAACATACCtatcttgtggaaaggacgaaacaccggAAGCAGACCCTCTATCATATGTTTAAGAGCTATGCTGGAAACAGCATAGCACTCGTTCCTTTCGA	107
RBP_lib_953	ACCGGCCAACATACCtatcttgtggaaaggacgaaacaccggTCAATGGGATAGATTCTGCCGTTTAAGAGCTATGCTGGAAACAGCATAGCACTCGTTCCTTTCGA	107
RBP_lib_954	ACCGGCCAACATACCtatcttgtggaaaggacgaaacaccggGATTCTGCCTGGATATCAGTGTTTAAGAGCTATGCTGGAAACAGCATAGCACTCGTTCCTTTCGA	107
RBP_lib_955	ACCGGCCAACATACCtatcttgtggaaaggacgaaacaccggAAAGCAGACCCTCTATCATAGTTTAAGAGCTATGCTGGAAACAGCATAGCACTCGTTCCTTTCGA	107
RBP_lib_956	ACCGGCCAACATACCtatcttgtggaaaggacgaaacaccggCGTCGAGGCCTAGCGCGGCCGTTTAAGAGCTATGCTGGAAACAGCATAGCACTCGTTCCTTTCGA	107
RBP_lib_957	ACCGGCCAACATACCtatcttgtggaaaggacgaaacaccggCCGTCTCGGAGGTCGCGAGGGTTTAAGAGCTATGCTGGAAACAGCATAGCACTCGTTCCTTTCGA	107
RBP_lib_958	ACCGGCCAACATACCtatcttgtggaaaggacgaaacaccggCCGCCTCGCGACCTCCGAGAGTTTAAGAGCTATGCTGGAAACAGCATAGCACTCGTTCCTTTCGA	107
RBP_lib_959	ACCGGCCAACATACCtatcttgtggaaaggacgaaacaccggCCTCGCGACCTCCGAGACGGGTTTAAGAGCTATGCTGGAAACAGCATAGCACTCGTTCCTTTCGA	107
RBP_lib_960	ACCGGCCAACATACCtatcttgtggaaaggacgaaacaccggTCGGAGGTCGCGAGGCGGCCGTTTAAGAGCTATGCTGGAAACAGCATAGCACTCGTTCCTTTCGA	107
RBP_lib_961	ACCGGCCAACATACCtatcttgtggaaaggacgaaacaccggCCGCCGTCTCGGAGGTCGCGGTTTAAGAGCTATGCTGGAAACAGCATAGCACTCGTTCCTTTCGA	107
RBP_lib_962	ACCGGCCAACATACCtatcttgtggaaaggacgaaacaccggCGGGAGGCCCAGAGCTCGAAGTTTAAGAGCTATGCTGGAAACAGCATAGCACTCGTTCCTTTCGA	107
RBP_lib_963	ACCGGCCAACATACCtatcttgtggaaaggacgaaacaccggAGGCCTCGACGACCCCAGCCGTTTAAGAGCTATGCTGGAAACAGCATAGCACTCGTTCCTTTCGA	107
RBP_lib_964	ACCGGCCAACATACCtatcttgtggaaaggacgaaacaccggTTTCCGAACGGGGCGGCCCCGTTTAAGAGCTATGCTGGAAACAGCATAGCACTCGTTCCTTTCGA	107
RBP_lib_965	ACCGGCCAACATACCtatcttgtggaaaggacgaaacaccggATTTCCGAACGGGGCGGCCCGTTTAAGAGCTATGCTGGAAACAGCATAGCACTCGTTCCTTTCGA	107
RBP_lib_966	ACCGGCCAACATACCtatcttgtggaaaggacgaaacaccggAGACGGGACATTGTCAAGAGGTTTAAGAGCTATGCTGGAAACAGCATAGCACTCGTTCCTTTCGA	107
RBP_lib_967	ACCGGCCAACATACCtatcttgtggaaaggacgaaacaccggACATTGTCAAGAGGGGGCGTGTTTAAGAGCTATGCTGGAAACAGCATAGCACTCGTTCCTTTCGA	107
RBP_lib_968	ACCGGCCAACATACCtatcttgtggaaaggacgaaacaccggAATGAGGGAAATTTCCGAACGTTTAAGAGCTATGCTGGAAACAGCATAGCACTCGTTCCTTTCGA	107
RBP_lib_969	ACCGGCCAACATACCtatcttgtggaaaggacgaaacaccggATGAGGGAAATTTCCGAACGGTTTAAGAGCTATGCTGGAAACAGCATAGCACTCGTTCCTTTCGA	107
RBP_lib_970	ACCGGCCAACATACCtatcttgtggaaaggacgaaacaccggGACGGGACATTGTCAAGAGGGTTTAAGAGCTATGCTGGAAACAGCATAGCACTCGTTCCTTTCGA	107
RBP_lib_971	ACCGGCCAACATACCtatcttgtggaaaggacgaaacaccggGTCAAGAGGGGGCGTTGGAGGTTTAAGAGCTATGCTGGAAACAGCATAGCACTCGTTCCTTTCGA	107
RBP_lib_972	ACCGGCCAACATACCtatcttgtggaaaggacgaaacaccggCCGGCGCCTCCTGTTGGTCGGTTTAAGAGCTATGCTGGAAACAGCATAGCACTCGTTCCTTTCGA	107
RBP_lib_973	ACCGGCCAACATACCtatcttgtggaaaggacgaaacaccggCCCCGACCAACAGGAGGCGCGTTTAAGAGCTATGCTGGAAACAGCATAGCACTCGTTCCTTTCGA	107
RBP_lib_974	ACCGGCCAACATACCtatcttgtggaaaggacgaaacaccggGTCGATCAGAGAAGCGGCGAGTTTAAGAGCTATGCTGGAAACAGCATAGCACTCGTTCCTTTCGA	107
RBP_lib_975	ACCGGCCAACATACCtatcttgtggaaaggacgaaacaccggCCCGGCGCCTCCTGTTGGTCGTTTAAGAGCTATGCTGGAAACAGCATAGCACTCGTTCCTTTCGA	107
RBP_lib_976	ACCGGCCAACATACCtatcttgtggaaaggacgaaacaccggCCGACCAACAGGAGGCGCCGGTTTAAGAGCTATGCTGGAAACAGCATAGCACTCGTTCCTTTCGA	107
RBP_lib_977	ACCGGCCAACATACCtatcttgtggaaaggacgaaacaccggGTAGCGGTAACACTGACGCTGTTTAAGAGCTATGCTGGAAACAGCATAGCACTCGTTCCTTTCGA	107
RBP_lib_978	ACCGGCCAACATACCtatcttgtggaaaggacgaaacaccggCGCTTCTCTGATCGACGGCCGTTTAAGAGCTATGCTGGAAACAGCATAGCACTCGTTCCTTTCGA	107
RBP_lib_979	ACCGGCCAACATACCtatcttgtggaaaggacgaaacaccggTTCGCCGCTTCTCTGATCGAGTTTAAGAGCTATGCTGGAAACAGCATAGCACTCGTTCCTTTCGA	107
RBP_lib_980	ACCGGCCAACATACCtatcttgtggaaaggacgaaacaccggTATCGGGAATGTGACTGGCGGTTTAAGAGCTATGCTGGAAACAGCATAGCACTCGTTCCTTTCGA	107
RBP_lib_981	ACCGGCCAACATACCtatcttgtggaaaggacgaaacaccggATATTTATCGGGAATGTGACGTTTAAGAGCTATGCTGGAAACAGCATAGCACTCGTTCCTTTCGA	107
RBP_lib_982	ACCGGCCAACATACCtatcttgtggaaaggacgaaacaccggGCTGTCATATCCTGGGACCCGTTTAAGAGCTATGCTGGAAACAGCATAGCACTCGTTCCTTTCGA	107
RBP_lib_983	ACCGGCCAACATACCtatcttgtggaaaggacgaaacaccggGCACTTTGCCACAGCGTCGTGTTTAAGAGCTATGCTGGAAACAGCATAGCACTCGTTCCTTTCGA	107
RBP_lib_984	ACCGGCCAACATACCtatcttgtggaaaggacgaaacaccggCAGAGAGGCCTACGACGCTGGTTTAAGAGCTATGCTGGAAACAGCATAGCACTCGTTCCTTTCGA	107
RBP_lib_985	ACCGGCCAACATACCtatcttgtggaaaggacgaaacaccggCTTCTAAAACTTCATCACGGGTTTAAGAGCTATGCTGGAAACAGCATAGCACTCGTTCCTTTCGA	107
RBP_lib_986	ACCGGCCAACATACCtatcttgtggaaaggacgaaacaccggCCGAAAGTGCTTCTTGCCTTGTTTAAGAGCTATGCTGGAAACAGCATAGCACTCGTTCCTTTCGA	107
RBP_lib_987	ACCGGCCAACATACCtatcttgtggaaaggacgaaacaccggACCGAAAGTGCTTCTTGCCTGTTTAAGAGCTATGCTGGAAACAGCATAGCACTCGTTCCTTTCGA	107
RBP_lib_988	ACCGGCCAACATACCtatcttgtggaaaggacgaaacaccggGGACGTGCTGGATCTTCACGGTTTAAGAGCTATGCTGGAAACAGCATAGCACTCGTTCCTTTCGA	107
RBP_lib_989	ACCGGCCAACATACCtatcttgtggaaaggacgaaacaccggAGGGGTCCCGAGCGCGGATGGTTTAAGAGCTATGCTGGAAACAGCATAGCACTCGTTCCTTTCGA	107
RBP_lib_990	ACCGGCCAACATACCtatcttgtggaaaggacgaaacaccggCGTGCTGGATCTTCACGAGGGTTTAAGAGCTATGCTGGAAACAGCATAGCACTCGTTCCTTTCGA	107
RBP_lib_991	ACCGGCCAACATACCtatcttgtggaaaggacgaaacaccggGTCCCGAGCGCGGATGCGGGGTTTAAGAGCTATGCTGGAAACAGCATAGCACTCGTTCCTTTCGA	107
RBP_lib_992	ACCGGCCAACATACCtatcttgtggaaaggacgaaacaccggGCGGGAGGATTACGACAGTGGTTTAAGAGCTATGCTGGAAACAGCATAGCACTCGTTCCTTTCGA	107
RBP_lib_993	ACCGGCCAACATACCtatcttgtggaaaggacgaaacaccggATCCTCCCGCATCCGCGCTCGTTTAAGAGCTATGCTGGAAACAGCATAGCACTCGTTCCTTTCGA	107
RBP_lib_994	ACCGGCCAACATACCtatcttgtggaaaggacgaaacaccggGCTGGATCTTCACGAGGCGGGTTTAAGAGCTATGCTGGAAACAGCATAGCACTCGTTCCTTTCGA	107
RBP_lib_995	ACCGGCCAACATACCtatcttgtggaaaggacgaaacaccggGTGCTGGATCTTCACGAGGCGTTTAAGAGCTATGCTGGAAACAGCATAGCACTCGTTCCTTTCGA	107
RBP_lib_996	ACCGGCCAACATACCtatcttgtggaaaggacgaaacaccggGGTTCCTCCTCTCGCCCGAAGTTTAAGAGCTATGCTGGAAACAGCATAGCACTCGTTCCTTTCGA	107
RBP_lib_997	ACCGGCCAACATACCtatcttgtggaaaggacgaaacaccggATAAACTGTACCGCTACGATGTTTAAGAGCTATGCTGGAAACAGCATAGCACTCGTTCCTTTCGA	107
RBP_lib_998	ACCGGCCAACATACCtatcttgtggaaaggacgaaacaccggCATCGTAGCGGTACAGTTTAGTTTAAGAGCTATGCTGGAAACAGCATAGCACTCGTTCCTTTCGA	107
RBP_lib_999	ACCGGCCAACATACCtatcttgtggaaaggacgaaacaccggCATAAACTGTACCGCTACGAGTTTAAGAGCTATGCTGGAAACAGCATAGCACTCGTTCCTTTCGA	107
RBP_lib_1000	ACCGGCCAACATACCtatcttgtggaaaggacgaaacaccggCCGGCCCTTCGGGCGAGAGGGTTTAAGAGCTATGCTGGAAACAGCATAGCACTCGTTCCTTTCGA	107
RBP_lib_1001	ACCGGCCAACATACCtatcttgtggaaaggacgaaacaccggCAACCGCCCGGTGGAGATCGGTTTAAGAGCTATGCTGGAAACAGCATAGCACTCGTTCCTTTCGA	107
RBP_lib_1002	ACCGGCCAACATACCtatcttgtggaaaggacgaaacaccggATCCCCGGGTGGTCGGAATCGTTTAAGAGCTATGCTGGAAACAGCATAGCACTCGTTCCTTTCGA	107
RBP_lib_1003	ACCGGCCAACATACCtatcttgtggaaaggacgaaacaccggACGTCCGTGAAAACTTCCTAGTTTAAGAGCTATGCTGGAAACAGCATAGCACTCGTTCCTTTCGA	107
RBP_lib_1004	ACCGGCCAACATACCtatcttgtggaaaggacgaaacaccggCCTTCCGCGGTGACTCGCGGGTTTAAGAGCTATGCTGGAAACAGCATAGCACTCGTTCCTTTCGA	107
RBP_lib_1005	ACCGGCCAACATACCtatcttgtggaaaggacgaaacaccggCGGTGACTCGCGGCGGCAGTGTTTAAGAGCTATGCTGGAAACAGCATAGCACTCGTTCCTTTCGA	107
RBP_lib_1006	ACCGGCCAACATACCtatcttgtggaaaggacgaaacaccggCCGCCGCGAGTCACCGCGGAGTTTAAGAGCTATGCTGGAAACAGCATAGCACTCGTTCCTTTCGA	107
RBP_lib_1007	ACCGGCCAACATACCtatcttgtggaaaggacgaaacaccggGTCACCGCGGAAGGAGTCGGGTTTAAGAGCTATGCTGGAAACAGCATAGCACTCGTTCCTTTCGA	107
RBP_lib_1008	ACCGGCCAACATACCtatcttgtggaaaggacgaaacaccggACTGCCGCCGCGAGTCACCGGTTTAAGAGCTATGCTGGAAACAGCATAGCACTCGTTCCTTTCGA	107
RBP_lib_1009	ACCGGCCAACATACCtatcttgtggaaaggacgaaacaccggATGCGCTCGGAAGAGGGGGCGTTTAAGAGCTATGCTGGAAACAGCATAGCACTCGTTCCTTTCGA	107
RBP_lib_1010	ACCGGCCAACATACCtatcttgtggaaaggacgaaacaccggCCCGCTCTCACTTAGGGTCGGTTTAAGAGCTATGCTGGAAACAGCATAGCACTCGTTCCTTTCGA	107
RBP_lib_1011	ACCGGCCAACATACCtatcttgtggaaaggacgaaacaccggCGAGTCACCGCGGAAGGAGTGTTTAAGAGCTATGCTGGAAACAGCATAGCACTCGTTCCTTTCGA	107
RBP_lib_1012	ACCGGCCAACATACCtatcttgtggaaaggacgaaacaccggGCCAACAAAATCGGCATATCGTTTAAGAGCTATGCTGGAAACAGCATAGCACTCGTTCCTTTCGA	107
RBP_lib_1013	ACCGGCCAACATACCtatcttgtggaaaggacgaaacaccggGTCTCGCAGTCCTGATGCAAGTTTAAGAGCTATGCTGGAAACAGCATAGCACTCGTTCCTTTCGA	107
RBP_lib_1014	ACCGGCCAACATACCtatcttgtggaaaggacgaaacaccggCGAATTCGCACTGATGAGAAGTTTAAGAGCTATGCTGGAAACAGCATAGCACTCGTTCCTTTCGA	107
RBP_lib_1015	ACCGGCCAACATACCtatcttgtggaaaggacgaaacaccggTCGGCATATCTGGTAGCCACGTTTAAGAGCTATGCTGGAAACAGCATAGCACTCGTTCCTTTCGA	107
RBP_lib_1016	ACCGGCCAACATACCtatcttgtggaaaggacgaaacaccggATGCAAAGAGGGCATTCCACGTTTAAGAGCTATGCTGGAAACAGCATAGCACTCGTTCCTTTCGA	107
RBP_lib_1017	ACCGGCCAACATACCtatcttgtggaaaggacgaaacaccggCCAAGGGCTCCATGCAAAGAGTTTAAGAGCTATGCTGGAAACAGCATAGCACTCGTTCCTTTCGA	107
RBP_lib_1018	ACCGGCCAACATACCtatcttgtggaaaggacgaaacaccggGAATTCGCACTGATGAGAATGTTTAAGAGCTATGCTGGAAACAGCATAGCACTCGTTCCTTTCGA	107
RBP_lib_1019	ACCGGCCAACATACCtatcttgtggaaaggacgaaacaccggATCTGGTAGCCACAGGTGCAGTTTAAGAGCTATGCTGGAAACAGCATAGCACTCGTTCCTTTCGA	107
RBP_lib_1020	ACCGGCCAACATACCtatcttgtggaaaggacgaaacaccggGGTAAGGATCACTCATCGAGGTTTAAGAGCTATGCTGGAAACAGCATAGCACTCGTTCCTTTCGA	107
RBP_lib_1021	ACCGGCCAACATACCtatcttgtggaaaggacgaaacaccggCAGGTAAGGATCACTCATCGGTTTAAGAGCTATGCTGGAAACAGCATAGCACTCGTTCCTTTCGA	107
RBP_lib_1022	ACCGGCCAACATACCtatcttgtggaaaggacgaaacaccggCCAGCTAGCTGTGGATCCGGGTTTAAGAGCTATGCTGGAAACAGCATAGCACTCGTTCCTTTCGA	107
RBP_lib_1023	ACCGGCCAACATACCtatcttgtggaaaggacgaaacaccggACTCCCTCAGCGAGGCACCAGTTTAAGAGCTATGCTGGAAACAGCATAGCACTCGTTCCTTTCGA	107
RBP_lib_1024	ACCGGCCAACATACCtatcttgtggaaaggacgaaacaccggGGACCATGGTGCCTCGCTGAGTTTAAGAGCTATGCTGGAAACAGCATAGCACTCGTTCCTTTCGA	107
RBP_lib_1025	ACCGGCCAACATACCtatcttgtggaaaggacgaaacaccggTTGGACTGTCCAGAAAGGTAGTTTAAGAGCTATGCTGGAAACAGCATAGCACTCGTTCCTTTCGA	107
RBP_lib_1026	ACCGGCCAACATACCtatcttgtggaaaggacgaaacaccggGGTGCCTCGCTGAGGGAGTAGTTTAAGAGCTATGCTGGAAACAGCATAGCACTCGTTCCTTTCGA	107
RBP_lib_1027	ACCGGCCAACATACCtatcttgtggaaaggacgaaacaccggATGGTGGATAGTAACTGGACGTTTAAGAGCTATGCTGGAAACAGCATAGCACTCGTTCCTTTCGA	107
RBP_lib_1028	ACCGGCCAACATACCtatcttgtggaaaggacgaaacaccggTTAGGCTTCTTGTCTTTCTGGTTTAAGAGCTATGCTGGAAACAGCATAGCACTCGTTCCTTTCGA	107
RBP_lib_1029	ACCGGCCAACATACCtatcttgtggaaaggacgaaacaccggGTACGGCATCCAGAAGCGAAGTTTAAGAGCTATGCTGGAAACAGCATAGCACTCGTTCCTTTCGA	107
RBP_lib_1030	ACCGGCCAACATACCtatcttgtggaaaggacgaaacaccggGGTTTAAACGGCGCGGCAGTGTTTAAGAGCTATGCTGGAAACAGCATAGCACTCGTTCCTTTCGA	107
RBP_lib_1031	ACCGGCCAACATACCtatcttgtggaaaggacgaaacaccggCGTCCTGCGCACCTTCTCCTGTTTAAGAGCTATGCTGGAAACAGCATAGCACTCGTTCCTTTCGA	107
RBP_lib_1032	ACCGGCCAACATACCtatcttgtggaaaggacgaaacaccggCCTCATCGGCCTTTCGCTTCGTTTAAGAGCTATGCTGGAAACAGCATAGCACTCGTTCCTTTCGA	107
RBP_lib_1033	ACCGGCCAACATACCtatcttgtggaaaggacgaaacaccggCGCGGCAGTGGGGTAAACACGTTTAAGAGCTATGCTGGAAACAGCATAGCACTCGTTCCTTTCGA	107
RBP_lib_1034	ACCGGCCAACATACCtatcttgtggaaaggacgaaacaccggGTTTAAACGGCGCGGCAGTGGTTTAAGAGCTATGCTGGAAACAGCATAGCACTCGTTCCTTTCGA	107
RBP_lib_1035	ACCGGCCAACATACCtatcttgtggaaaggacgaaacaccggCGACCGAGGAGAAGGTGCGCGTTTAAGAGCTATGCTGGAAACAGCATAGCACTCGTTCCTTTCGA	107
RBP_lib_1036	ACCGGCCAACATACCtatcttgtggaaaggacgaaacaccggGCGGCAGTGGGGTAAACACTGTTTAAGAGCTATGCTGGAAACAGCATAGCACTCGTTCCTTTCGA	107
RBP_lib_1037	ACCGGCCAACATACCtatcttgtggaaaggacgaaacaccggGTTCGTGAGCGAGGGTTCCCGTTTAAGAGCTATGCTGGAAACAGCATAGCACTCGTTCCTTTCGA	107
RBP_lib_1038	ACCGGCCAACATACCtatcttgtggaaaggacgaaacaccggTTCGTGAGCGAGGGTTCCCCGTTTAAGAGCTATGCTGGAAACAGCATAGCACTCGTTCCTTTCGA	107
RBP_lib_1039	ACCGGCCAACATACCtatcttgtggaaaggacgaaacaccggATGAGACTGTTCGTGAGCGAGTTTAAGAGCTATGCTGGAAACAGCATAGCACTCGTTCCTTTCGA	107
RBP_lib_1040	ACCGGCCAACATACCtatcttgtggaaaggacgaaacaccggTCGTGAGCGAGGGTTCCCCGGTTTAAGAGCTATGCTGGAAACAGCATAGCACTCGTTCCTTTCGA	107
RBP_lib_1041	ACCGGCCAACATACCtatcttgtggaaaggacgaaacaccggACCTTAGGCCGGGTAAGGAAGTTTAAGAGCTATGCTGGAAACAGCATAGCACTCGTTCCTTTCGA	107
RBP_lib_1042	ACCGGCCAACATACCtatcttgtggaaaggacgaaacaccggACCATTCCTTACCCGGCCTAGTTTAAGAGCTATGCTGGAAACAGCATAGCACTCGTTCCTTTCGA	107
RBP_lib_1043	ACCGGCCAACATACCtatcttgtggaaaggacgaaacaccggGAGTCAGGACTCTCCGAAGTGTTTAAGAGCTATGCTGGAAACAGCATAGCACTCGTTCCTTTCGA	107
RBP_lib_1044	ACCGGCCAACATACCtatcttgtggaaaggacgaaacaccggTGCTGCCCTACACTGTCTAGGTTTAAGAGCTATGCTGGAAACAGCATAGCACTCGTTCCTTTCGA	107
RBP_lib_1045	ACCGGCCAACATACCtatcttgtggaaaggacgaaacaccggGACGAACTCCGCGTTGATCTGTTTAAGAGCTATGCTGGAAACAGCATAGCACTCGTTCCTTTCGA	107
RBP_lib_1046	ACCGGCCAACATACCtatcttgtggaaaggacgaaacaccggCGCGTTGATCTGGGACACCGGTTTAAGAGCTATGCTGGAAACAGCATAGCACTCGTTCCTTTCGA	107
RBP_lib_1047	ACCGGCCAACATACCtatcttgtggaaaggacgaaacaccggTGACGAACTCCGCGTTGATCGTTTAAGAGCTATGCTGGAAACAGCATAGCACTCGTTCCTTTCGA	107
RBP_lib_1048	ACCGGCCAACATACCtatcttgtggaaaggacgaaacaccggGCGTTGATCTGGGACACCGTGTTTAAGAGCTATGCTGGAAACAGCATAGCACTCGTTCCTTTCGA	107
RBP_lib_1049	ACCGGCCAACATACCtatcttgtggaaaggacgaaacaccggTGCGCAGCCCAAGAAAATCGGTTTAAGAGCTATGCTGGAAACAGCATAGCACTCGTTCCTTTCGA	107
RBP_lib_1050	ACCGGCCAACATACCtatcttgtggaaaggacgaaacaccggCGTTGATCTGGGACACCGTGGTTTAAGAGCTATGCTGGAAACAGCATAGCACTCGTTCCTTTCGA	107
RBP_lib_1051	ACCGGCCAACATACCtatcttgtggaaaggacgaaacaccggCAAGAAAATCGTGGCCCCCAGTTTAAGAGCTATGCTGGAAACAGCATAGCACTCGTTCCTTTCGA	107
RBP_lib_1052	ACCGGCCAACATACCtatcttgtggaaaggacgaaacaccggCTCGCCGTCAGTCTCAGCTAGTTTAAGAGCTATGCTGGAAACAGCATAGCACTCGTTCCTTTCGA	107
RBP_lib_1053	ACCGGCCAACATACCtatcttgtggaaaggacgaaacaccggTTCTTCCCGGTCGCGTGCACGTTTAAGAGCTATGCTGGAAACAGCATAGCACTCGTTCCTTTCGA	107
RBP_lib_1054	ACCGGCCAACATACCtatcttgtggaaaggacgaaacaccggGCGGTCGCTGCGCTTCTTCCGTTTAAGAGCTATGCTGGAAACAGCATAGCACTCGTTCCTTTCGA	107
RBP_lib_1055	ACCGGCCAACATACCtatcttgtggaaaggacgaaacaccggCCGGCGTGAAACGTGAGCCAGTTTAAGAGCTATGCTGGAAACAGCATAGCACTCGTTCCTTTCGA	107
RBP_lib_1056	ACCGGCCAACATACCtatcttgtggaaaggacgaaacaccggCGTGAAACGTGAGCCATGGCGTTTAAGAGCTATGCTGGAAACAGCATAGCACTCGTTCCTTTCGA	107
RBP_lib_1057	ACCGGCCAACATACCtatcttgtggaaaggacgaaacaccggCCATGGCTCACGTTTCACGCGTTTAAGAGCTATGCTGGAAACAGCATAGCACTCGTTCCTTTCGA	107
RBP_lib_1058	ACCGGCCAACATACCtatcttgtggaaaggacgaaacaccggGTGAAACGTGAGCCATGGCTGTTTAAGAGCTATGCTGGAAACAGCATAGCACTCGTTCCTTTCGA	107
RBP_lib_1059	ACCGGCCAACATACCtatcttgtggaaaggacgaaacaccggATGAAACTGCGGCGGAAAACGTTTAAGAGCTATGCTGGAAACAGCATAGCACTCGTTCCTTTCGA	107
RBP_lib_1060	ACCGGCCAACATACCtatcttgtggaaaggacgaaacaccggTGCTCCAGCCGTCCCAGCCAGTTTAAGAGCTATGCTGGAAACAGCATAGCACTCGTTCCTTTCGA	107
RBP_lib_1061	ACCGGCCAACATACCtatcttgtggaaaggacgaaacaccggGCACAATCCCGCCGCAGTCTGTTTAAGAGCTATGCTGGAAACAGCATAGCACTCGTTCCTTTCGA	107
RBP_lib_1062	ACCGGCCAACATACCtatcttgtggaaaggacgaaacaccggAGCCAGCCGCGCACTGCTGCGTTTAAGAGCTATGCTGGAAACAGCATAGCACTCGTTCCTTTCGA	107
RBP_lib_1063	ACCGGCCAACATACCtatcttgtggaaaggacgaaacaccggAGGGGCTTTGCTTCGGAGCCGTTTAAGAGCTATGCTGGAAACAGCATAGCACTCGTTCCTTTCGA	107
RBP_lib_1064	ACCGGCCAACATACCtatcttgtggaaaggacgaaacaccggTACGGGACACACCACTTTCGGTTTAAGAGCTATGCTGGAAACAGCATAGCACTCGTTCCTTTCGA	107
RBP_lib_1065	ACCGGCCAACATACCtatcttgtggaaaggacgaaacaccggAAGATTGAACCTTTCTACAAGTTTAAGAGCTATGCTGGAAACAGCATAGCACTCGTTCCTTTCGA	107
RBP_lib_1066	ACCGGCCAACATACCtatcttgtggaaaggacgaaacaccggACTGCAGGACCGCTCATGTTGTTTAAGAGCTATGCTGGAAACAGCATAGCACTCGTTCCTTTCGA	107
RBP_lib_1067	ACCGGCCAACATACCtatcttgtggaaaggacgaaacaccggTGGACACCTCTATCCGCGTGGTTTAAGAGCTATGCTGGAAACAGCATAGCACTCGTTCCTTTCGA	107
RBP_lib_1068	ACCGGCCAACATACCtatcttgtggaaaggacgaaacaccggTATCCGCGTGTGGTCACTGCGTTTAAGAGCTATGCTGGAAACAGCATAGCACTCGTTCCTTTCGA	107
RBP_lib_1069	ACCGGCCAACATACCtatcttgtggaaaggacgaaacaccggCGCGAAGTTCGTTCACCTTCGTTTAAGAGCTATGCTGGAAACAGCATAGCACTCGTTCCTTTCGA	107
RBP_lib_1070	ACCGGCCAACATACCtatcttgtggaaaggacgaaacaccggGACGACGATCCGGGGTTACCGTTTAAGAGCTATGCTGGAAACAGCATAGCACTCGTTCCTTTCGA	107
RBP_lib_1071	ACCGGCCAACATACCtatcttgtggaaaggacgaaacaccggTCGAGGCTGACGACGATCCGGTTTAAGAGCTATGCTGGAAACAGCATAGCACTCGTTCCTTTCGA	107
RBP_lib_1072	ACCGGCCAACATACCtatcttgtggaaaggacgaaacaccggACGACGATCCGGGGTTACCTGTTTAAGAGCTATGCTGGAAACAGCATAGCACTCGTTCCTTTCGA	107
RBP_lib_1073	ACCGGCCAACATACCtatcttgtggaaaggacgaaacaccggTCGAGCTCCCGTTCGTCTTCGTTTAAGAGCTATGCTGGAAACAGCATAGCACTCGTTCCTTTCGA	107
RBP_lib_1074	ACCGGCCAACATACCtatcttgtggaaaggacgaaacaccggCTCGAGCTCCCGTTCGTCTTGTTTAAGAGCTATGCTGGAAACAGCATAGCACTCGTTCCTTTCGA	107
RBP_lib_1075	ACCGGCCAACATACCtatcttgtggaaaggacgaaacaccggCTCGAGGCTGACGACGATCCGTTTAAGAGCTATGCTGGAAACAGCATAGCACTCGTTCCTTTCGA	107
RBP_lib_1076	ACCGGCCAACATACCtatcttgtggaaaggacgaaacaccggCGAGGAGCCCGAAGACGAACGTTTAAGAGCTATGCTGGAAACAGCATAGCACTCGTTCCTTTCGA	107
RBP_lib_1077	ACCGGCCAACATACCtatcttgtggaaaggacgaaacaccggCGCACCGCTCGCGGTGCCTCGTTTAAGAGCTATGCTGGAAACAGCATAGCACTCGTTCCTTTCGA	107
RBP_lib_1078	ACCGGCCAACATACCtatcttgtggaaaggacgaaacaccggGCACCGCTCGCGGTGCCTCTGTTTAAGAGCTATGCTGGAAACAGCATAGCACTCGTTCCTTTCGA	107
RBP_lib_1079	ACCGGCCAACATACCtatcttgtggaaaggacgaaacaccggGGAGCATGCCGCACCGCTCGGTTTAAGAGCTATGCTGGAAACAGCATAGCACTCGTTCCTTTCGA	107
RBP_lib_1080	ACCGGCCAACATACCtatcttgtggaaaggacgaaacaccggCAGAGGCACCGCGAGCGGTGGTTTAAGAGCTATGCTGGAAACAGCATAGCACTCGTTCCTTTCGA	107
RBP_lib_1081	ACCGGCCAACATACCtatcttgtggaaaggacgaaacaccggGGTCATGTGCAGTCGCTGCAGTTTAAGAGCTATGCTGGAAACAGCATAGCACTCGTTCCTTTCGA	107
RBP_lib_1082	ACCGGCCAACATACCtatcttgtggaaaggacgaaacaccggGCTCGCGGTGCCTCTGGGTCGTTTAAGAGCTATGCTGGAAACAGCATAGCACTCGTTCCTTTCGA	107
RBP_lib_1083	ACCGGCCAACATACCtatcttgtggaaaggacgaaacaccggCTCCCCCTGCGGGAAGTTTCGTTTAAGAGCTATGCTGGAAACAGCATAGCACTCGTTCCTTTCGA	107
RBP_lib_1084	ACCGGCCAACATACCtatcttgtggaaaggacgaaacaccggCCCGCAGGGGGAGACACTCTGTTTAAGAGCTATGCTGGAAACAGCATAGCACTCGTTCCTTTCGA	107
RBP_lib_1085	ACCGGCCAACATACCtatcttgtggaaaggacgaaacaccggTGTAGGGGTCGTGGCGCCGCGTTTAAGAGCTATGCTGGAAACAGCATAGCACTCGTTCCTTTCGA	107
RBP_lib_1086	ACCGGCCAACATACCtatcttgtggaaaggacgaaacaccggCCCCTACATCAGTCGCATCGGTTTAAGAGCTATGCTGGAAACAGCATAGCACTCGTTCCTTTCGA	107
RBP_lib_1087	ACCGGCCAACATACCtatcttgtggaaaggacgaaacaccggCCACGATGCGACTGATGTAGGTTTAAGAGCTATGCTGGAAACAGCATAGCACTCGTTCCTTTCGA	107
RBP_lib_1088	ACCGGCCAACATACCtatcttgtggaaaggacgaaacaccggTGCGACTGATGTAGGGGTCGGTTTAAGAGCTATGCTGGAAACAGCATAGCACTCGTTCCTTTCGA	107
RBP_lib_1089	ACCGGCCAACATACCtatcttgtggaaaggacgaaacaccggGAAGGGACACGATATCAGCCGTTTAAGAGCTATGCTGGAAACAGCATAGCACTCGTTCCTTTCGA	107
RBP_lib_1090	ACCGGCCAACATACCtatcttgtggaaaggacgaaacaccggCATCAGTCGCATCGTGGACGGTTTAAGAGCTATGCTGGAAACAGCATAGCACTCGTTCCTTTCGA	107
RBP_lib_1091	ACCGGCCAACATACCtatcttgtggaaaggacgaaacaccggTCCACGATGCGACTGATGTAGTTTAAGAGCTATGCTGGAAACAGCATAGCACTCGTTCCTTTCGA	107
RBP_lib_1092	ACCGGCCAACATACCtatcttgtggaaaggacgaaacaccggCGGCCATCGGGCCAACGAGTGTTTAAGAGCTATGCTGGAAACAGCATAGCACTCGTTCCTTTCGA	107
RBP_lib_1093	ACCGGCCAACATACCtatcttgtggaaaggacgaaacaccggTCGCTCCCCGGTCGACTCGCGTTTAAGAGCTATGCTGGAAACAGCATAGCACTCGTTCCTTTCGA	107
RBP_lib_1094	ACCGGCCAACATACCtatcttgtggaaaggacgaaacaccggCCCCCGGAGAGCTAGGCTCGGTTTAAGAGCTATGCTGGAAACAGCATAGCACTCGTTCCTTTCGA	107
RBP_lib_1095	ACCGGCCAACATACCtatcttgtggaaaggacgaaacaccggGCGAACATCGAGGCCGGCACGTTTAAGAGCTATGCTGGAAACAGCATAGCACTCGTTCCTTTCGA	107
RBP_lib_1096	ACCGGCCAACATACCtatcttgtggaaaggacgaaacaccggCCCCGAGCCTAGCTCTCCGGGTTTAAGAGCTATGCTGGAAACAGCATAGCACTCGTTCCTTTCGA	107
RBP_lib_1097	ACCGGCCAACATACCtatcttgtggaaaggacgaaacaccggAGGCTCGGGGGCGAACATCGGTTTAAGAGCTATGCTGGAAACAGCATAGCACTCGTTCCTTTCGA	107
RBP_lib_1098	ACCGGCCAACATACCtatcttgtggaaaggacgaaacaccggATCGAAGCCGCCATGGAGTCGTTTAAGAGCTATGCTGGAAACAGCATAGCACTCGTTCCTTTCGA	107
RBP_lib_1099	ACCGGCCAACATACCtatcttgtggaaaggacgaaacaccggTCGGGGGCGAACATCGAGGCGTTTAAGAGCTATGCTGGAAACAGCATAGCACTCGTTCCTTTCGA	107
RBP_lib_1100	ACCGGCCAACATACCtatcttgtggaaaggacgaaacaccggGCTCAACGGCGAGCCGGAGCGTTTAAGAGCTATGCTGGAAACAGCATAGCACTCGTTCCTTTCGA	107
RBP_lib_1101	ACCGGCCAACATACCtatcttgtggaaaggacgaaacaccggCCCTTGATATAAATGTACGGGTTTAAGAGCTATGCTGGAAACAGCATAGCACTCGTTCCTTTCGA	107
RBP_lib_1102	ACCGGCCAACATACCtatcttgtggaaaggacgaaacaccggCCACCGTACATTTATATCAAGTTTAAGAGCTATGCTGGAAACAGCATAGCACTCGTTCCTTTCGA	107
RBP_lib_1103	ACCGGCCAACATACCtatcttgtggaaaggacgaaacaccggGAAAAGTCAACATTGCGTGCGTTTAAGAGCTATGCTGGAAACAGCATAGCACTCGTTCCTTTCGA	107
RBP_lib_1104	ACCGGCCAACATACCtatcttgtggaaaggacgaaacaccggAACATGGGATTGATCGTTACGTTTAAGAGCTATGCTGGAAACAGCATAGCACTCGTTCCTTTCGA	107
RBP_lib_1105	ACCGGCCAACATACCtatcttgtggaaaggacgaaacaccggGGTTCTTCAGGTCCTAACACGTTTAAGAGCTATGCTGGAAACAGCATAGCACTCGTTCCTTTCGA	107
RBP_lib_1106	ACCGGCCAACATACCtatcttgtggaaaggacgaaacaccggGCCACCGTACATTTATATCAGTTTAAGAGCTATGCTGGAAACAGCATAGCACTCGTTCCTTTCGA	107
RBP_lib_1107	ACCGGCCAACATACCtatcttgtggaaaggacgaaacaccggTTGCTCGGTTAGACTGTCCTGTTTAAGAGCTATGCTGGAAACAGCATAGCACTCGTTCCTTTCGA	107
RBP_lib_1108	ACCGGCCAACATACCtatcttgtggaaaggacgaaacaccggACAGTCTAACCGAGCAACCTGTTTAAGAGCTATGCTGGAAACAGCATAGCACTCGTTCCTTTCGA	107
RBP_lib_1109	ACCGGCCAACATACCtatcttgtggaaaggacgaaacaccggGCCTGTACCCGCCGAAGGGGGTTTAAGAGCTATGCTGGAAACAGCATAGCACTCGTTCCTTTCGA	107
RBP_lib_1110	ACCGGCCAACATACCtatcttgtggaaaggacgaaacaccggTGTGCCTGTACCCGCCGAAGGTTTAAGAGCTATGCTGGAAACAGCATAGCACTCGTTCCTTTCGA	107
RBP_lib_1111	ACCGGCCAACATACCtatcttgtggaaaggacgaaacaccggGCACAATCTCCCGACACTCGGTTTAAGAGCTATGCTGGAAACAGCATAGCACTCGTTCCTTTCGA	107
RBP_lib_1112	ACCGGCCAACATACCtatcttgtggaaaggacgaaacaccggATTGTGCCTGTACCCGCCGAGTTTAAGAGCTATGCTGGAAACAGCATAGCACTCGTTCCTTTCGA	107
RBP_lib_1113	ACCGGCCAACATACCtatcttgtggaaaggacgaaacaccggGCCACCCCTTCGGCGGGTACGTTTAAGAGCTATGCTGGAAACAGCATAGCACTCGTTCCTTTCGA	107
RBP_lib_1114	ACCGGCCAACATACCtatcttgtggaaaggacgaaacaccggTTGTGCCTGTACCCGCCGAAGTTTAAGAGCTATGCTGGAAACAGCATAGCACTCGTTCCTTTCGA	107
RBP_lib_1115	ACCGGCCAACATACCtatcttgtggaaaggacgaaacaccggGGCACAATCTCCCGACACTCGTTTAAGAGCTATGCTGGAAACAGCATAGCACTCGTTCCTTTCGA	107
RBP_lib_1116	ACCGGCCAACATACCtatcttgtggaaaggacgaaacaccggGGTCCGCTGCCCCGAGTGTCGTTTAAGAGCTATGCTGGAAACAGCATAGCACTCGTTCCTTTCGA	107
RBP_lib_1117	ACCGGCCAACATACCtatcttgtggaaaggacgaaacaccggTCGTGGGGTCCGGTCGGTGGGTTTAAGAGCTATGCTGGAAACAGCATAGCACTCGTTCCTTTCGA	107
RBP_lib_1118	ACCGGCCAACATACCtatcttgtggaaaggacgaaacaccggTCACGAGGCGGTGCGCGCCAGTTTAAGAGCTATGCTGGAAACAGCATAGCACTCGTTCCTTTCGA	107
RBP_lib_1119	ACCGGCCAACATACCtatcttgtggaaaggacgaaacaccggGCAGCGCGCTTCGTGGGGTCGTTTAAGAGCTATGCTGGAAACAGCATAGCACTCGTTCCTTTCGA	107
RBP_lib_1120	ACCGGCCAACATACCtatcttgtggaaaggacgaaacaccggTGCGCCGCTCCACCACCGACGTTTAAGAGCTATGCTGGAAACAGCATAGCACTCGTTCCTTTCGA	107
RBP_lib_1121	ACCGGCCAACATACCtatcttgtggaaaggacgaaacaccggGGACCCCACGAAGCGCGCTGGTTTAAGAGCTATGCTGGAAACAGCATAGCACTCGTTCCTTTCGA	107
RBP_lib_1122	ACCGGCCAACATACCtatcttgtggaaaggacgaaacaccggGCTTCGTGGGGTCCGGTCGGGTTTAAGAGCTATGCTGGAAACAGCATAGCACTCGTTCCTTTCGA	107
RBP_lib_1123	ACCGGCCAACATACCtatcttgtggaaaggacgaaacaccggGCGCACCACCGCGCGCTCCAGTTTAAGAGCTATGCTGGAAACAGCATAGCACTCGTTCCTTTCGA	107
RBP_lib_1124	ACCGGCCAACATACCtatcttgtggaaaggacgaaacaccggCGTCGGCCAACGCGAAAGACGTTTAAGAGCTATGCTGGAAACAGCATAGCACTCGTTCCTTTCGA	107
RBP_lib_1125	ACCGGCCAACATACCtatcttgtggaaaggacgaaacaccggCATCGAACGTTACAATCTGTGTTTAAGAGCTATGCTGGAAACAGCATAGCACTCGTTCCTTTCGA	107
RBP_lib_1126	ACCGGCCAACATACCtatcttgtggaaaggacgaaacaccggCCACAGATTGTAACGTTCGAGTTTAAGAGCTATGCTGGAAACAGCATAGCACTCGTTCCTTTCGA	107
RBP_lib_1127	ACCGGCCAACATACCtatcttgtggaaaggacgaaacaccggAGATTGTAACGTTCGATGGAGTTTAAGAGCTATGCTGGAAACAGCATAGCACTCGTTCCTTTCGA	107
RBP_lib_1128	ACCGGCCAACATACCtatcttgtggaaaggacgaaacaccggGCCACCTCGTAGGCACCGCAGTTTAAGAGCTATGCTGGAAACAGCATAGCACTCGTTCCTTTCGA	107
RBP_lib_1129	ACCGGCCAACATACCtatcttgtggaaaggacgaaacaccggTGAGCCCTGCGGTGCCTACGGTTTAAGAGCTATGCTGGAAACAGCATAGCACTCGTTCCTTTCGA	107
RBP_lib_1130	ACCGGCCAACATACCtatcttgtggaaaggacgaaacaccggTGCCACCTCGTAGGCACCGCGTTTAAGAGCTATGCTGGAAACAGCATAGCACTCGTTCCTTTCGA	107
RBP_lib_1131	ACCGGCCAACATACCtatcttgtggaaaggacgaaacaccggGCCCTGCGGTGCCTACGAGGGTTTAAGAGCTATGCTGGAAACAGCATAGCACTCGTTCCTTTCGA	107
RBP_lib_1132	ACCGGCCAACATACCtatcttgtggaaaggacgaaacaccggTGGTACTGTTTCTCCTGGATGTTTAAGAGCTATGCTGGAAACAGCATAGCACTCGTTCCTTTCGA	107
RBP_lib_1133	ACCGGCCAACATACCtatcttgtggaaaggacgaaacaccggTCGACAAATGCTTCACCACTGTTTAAGAGCTATGCTGGAAACAGCATAGCACTCGTTCCTTTCGA	107
RBP_lib_1134	ACCGGCCAACATACCtatcttgtggaaaggacgaaacaccggATAGTCATGAGCTTTCTAGGGTTTAAGAGCTATGCTGGAAACAGCATAGCACTCGTTCCTTTCGA	107
RBP_lib_1135	ACCGGCCAACATACCtatcttgtggaaaggacgaaacaccggACTCCCATTTGGCTGTAGCAGTTTAAGAGCTATGCTGGAAACAGCATAGCACTCGTTCCTTTCGA	107
RBP_lib_1136	ACCGGCCAACATACCtatcttgtggaaaggacgaaacaccggCTCATGACTATGCAGCGCCCGTTTAAGAGCTATGCTGGAAACAGCATAGCACTCGTTCCTTTCGA	107
RBP_lib_1137	ACCGGCCAACATACCtatcttgtggaaaggacgaaacaccggGCTCATGACTATGCAGCGCCGTTTAAGAGCTATGCTGGAAACAGCATAGCACTCGTTCCTTTCGA	107
RBP_lib_1138	ACCGGCCAACATACCtatcttgtggaaaggacgaaacaccggAGCGCCCGGGTCCTTACGATGTTTAAGAGCTATGCTGGAAACAGCATAGCACTCGTTCCTTTCGA	107
RBP_lib_1139	ACCGGCCAACATACCtatcttgtggaaaggacgaaacaccggTGCATAGTCATGAGCTTTCTGTTTAAGAGCTATGCTGGAAACAGCATAGCACTCGTTCCTTTCGA	107
RBP_lib_1140	ACCGGCCAACATACCtatcttgtggaaaggacgaaacaccggACCACTCGGTCTGCCTTCTCGTTTAAGAGCTATGCTGGAAACAGCATAGCACTCGTTCCTTTCGA	107
RBP_lib_1141	ACCGGCCAACATACCtatcttgtggaaaggacgaaacaccggGTCTGCCCCGGGGGAAACGCGTTTAAGAGCTATGCTGGAAACAGCATAGCACTCGTTCCTTTCGA	107
RBP_lib_1142	ACCGGCCAACATACCtatcttgtggaaaggacgaaacaccggCACGCCTTCTCAGCCCCGCCGTTTAAGAGCTATGCTGGAAACAGCATAGCACTCGTTCCTTTCGA	107
RBP_lib_1143	ACCGGCCAACATACCtatcttgtggaaaggacgaaacaccggACCGGTGCAGTCTGCCCCGGGTTTAAGAGCTATGCTGGAAACAGCATAGCACTCGTTCCTTTCGA	107
RBP_lib_1144	ACCGGCCAACATACCtatcttgtggaaaggacgaaacaccggGTCCAGGGGACCTGGCGGGTGTTTAAGAGCTATGCTGGAAACAGCATAGCACTCGTTCCTTTCGA	107
RBP_lib_1145	ACCGGCCAACATACCtatcttgtggaaaggacgaaacaccggCTCGGGAGGCTGCACTGCTAGTTTAAGAGCTATGCTGGAAACAGCATAGCACTCGTTCCTTTCGA	107
RBP_lib_1146	ACCGGCCAACATACCtatcttgtggaaaggacgaaacaccggTCGGGAGGCTGCACTGCTAGGTTTAAGAGCTATGCTGGAAACAGCATAGCACTCGTTCCTTTCGA	107
RBP_lib_1147	ACCGGCCAACATACCtatcttgtggaaaggacgaaacaccggGTGCAAGCCCTACCGAGTTTGTTTAAGAGCTATGCTGGAAACAGCATAGCACTCGTTCCTTTCGA	107
RBP_lib_1148	ACCGGCCAACATACCtatcttgtggaaaggacgaaacaccggCATAGGTCCCAAACTCGGTAGTTTAAGAGCTATGCTGGAAACAGCATAGCACTCGTTCCTTTCGA	107
RBP_lib_1149	ACCGGCCAACATACCtatcttgtggaaaggacgaaacaccggAGCTATAACAACGGAGGAGGGTTTAAGAGCTATGCTGGAAACAGCATAGCACTCGTTCCTTTCGA	107
RBP_lib_1150	ACCGGCCAACATACCtatcttgtggaaaggacgaaacaccggTATAACAACGGAGGAGGCGGGTTTAAGAGCTATGCTGGAAACAGCATAGCACTCGTTCCTTTCGA	107
RBP_lib_1151	ACCGGCCAACATACCtatcttgtggaaaggacgaaacaccggGGCGGAGGCGGCTTTGGCGGGTTTAAGAGCTATGCTGGAAACAGCATAGCACTCGTTCCTTTCGA	107
RBP_lib_1152	ACCGGCCAACATACCtatcttgtggaaaggacgaaacaccggGGCGGCTTTGGCGGTGGTAGGTTTAAGAGCTATGCTGGAAACAGCATAGCACTCGTTCCTTTCGA	107
RBP_lib_1153	ACCGGCCAACATACCtatcttgtggaaaggacgaaacaccggGCTTGCCTCATCAAGGCCGGGTTTAAGAGCTATGCTGGAAACAGCATAGCACTCGTTCCTTTCGA	107
RBP_lib_1154	ACCGGCCAACATACCtatcttgtggaaaggacgaaacaccggCGGCCTTGATGAGGCAAGCAGTTTAAGAGCTATGCTGGAAACAGCATAGCACTCGTTCCTTTCGA	107
RBP_lib_1155	ACCGGCCAACATACCtatcttgtggaaaggacgaaacaccggCAGGTGTTATTTAGGACTGGGTTTAAGAGCTATGCTGGAAACAGCATAGCACTCGTTCCTTTCGA	107
RBP_lib_1156	ACCGGCCAACATACCtatcttgtggaaaggacgaaacaccggAAACCTTGCTTGCCTCATCAGTTTAAGAGCTATGCTGGAAACAGCATAGCACTCGTTCCTTTCGA	107
RBP_lib_1157	ACCGGCCAACATACCtatcttgtggaaaggacgaaacaccggCTTGCTTGCCTCATCAAGGCGTTTAAGAGCTATGCTGGAAACAGCATAGCACTCGTTCCTTTCGA	107
RBP_lib_1158	ACCGGCCAACATACCtatcttgtggaaaggacgaaacaccggTGTTATTTAGGACTGGAGGCGTTTAAGAGCTATGCTGGAAACAGCATAGCACTCGTTCCTTTCGA	107
RBP_lib_1159	ACCGGCCAACATACCtatcttgtggaaaggacgaaacaccggACACTGGCAACACGTTTCTCGTTTAAGAGCTATGCTGGAAACAGCATAGCACTCGTTCCTTTCGA	107
RBP_lib_1160	ACCGGCCAACATACCtatcttgtggaaaggacgaaacaccggAGCCCGGGAATCCATTGGACGTTTAAGAGCTATGCTGGAAACAGCATAGCACTCGTTCCTTTCGA	107
RBP_lib_1161	ACCGGCCAACATACCtatcttgtggaaaggacgaaacaccggAACGGAGCCGGGCCCGAAGTGTTTAAGAGCTATGCTGGAAACAGCATAGCACTCGTTCCTTTCGA	107
RBP_lib_1162	ACCGGCCAACATACCtatcttgtggaaaggacgaaacaccggTTCCGCGCCAACCCAACTTCGTTTAAGAGCTATGCTGGAAACAGCATAGCACTCGTTCCTTTCGA	107
RBP_lib_1163	ACCGGCCAACATACCtatcttgtggaaaggacgaaacaccggGTTCCGCGCCAACCCAACTTGTTTAAGAGCTATGCTGGAAACAGCATAGCACTCGTTCCTTTCGA	107
RBP_lib_1164	ACCGGCCAACATACCtatcttgtggaaaggacgaaacaccggAGCCGGGCCCGAAGTTGGGTGTTTAAGAGCTATGCTGGAAACAGCATAGCACTCGTTCCTTTCGA	107
RBP_lib_1165	ACCGGCCAACATACCtatcttgtggaaaggacgaaacaccggCGGAACGGAGTGAAGGCCGGGTTTAAGAGCTATGCTGGAAACAGCATAGCACTCGTTCCTTTCGA	107
RBP_lib_1166	ACCGGCCAACATACCtatcttgtggaaaggacgaaacaccggGTTGGCGCGGAACGGAGTGAGTTTAAGAGCTATGCTGGAAACAGCATAGCACTCGTTCCTTTCGA	107
RBP_lib_1167	ACCGGCCAACATACCtatcttgtggaaaggacgaaacaccggGGCCCGAAGTTGGGTTGGCGGTTTAAGAGCTATGCTGGAAACAGCATAGCACTCGTTCCTTTCGA	107
RBP_lib_1168	ACCGGCCAACATACCtatcttgtggaaaggacgaaacaccggCGGCGCAGCAGATCCCGGGCGTTTAAGAGCTATGCTGGAAACAGCATAGCACTCGTTCCTTTCGA	107
RBP_lib_1169	ACCGGCCAACATACCtatcttgtggaaaggacgaaacaccggAACGCTTTGTCAAGAAGCGAGTTTAAGAGCTATGCTGGAAACAGCATAGCACTCGTTCCTTTCGA	107
RBP_lib_1170	ACCGGCCAACATACCtatcttgtggaaaggacgaaacaccggCTTTGGGCAACCTTCGAAAAGTTTAAGAGCTATGCTGGAAACAGCATAGCACTCGTTCCTTTCGA	107
RBP_lib_1171	ACCGGCCAACATACCtatcttgtggaaaggacgaaacaccggAACTTAGACACCTTGTTAGGGTTTAAGAGCTATGCTGGAAACAGCATAGCACTCGTTCCTTTCGA	107
RBP_lib_1172	ACCGGCCAACATACCtatcttgtggaaaggacgaaacaccggTAGACACCTTGTTAGGGGGTGTTTAAGAGCTATGCTGGAAACAGCATAGCACTCGTTCCTTTCGA	107
RBP_lib_1173	ACCGGCCAACATACCtatcttgtggaaaggacgaaacaccggAAAGAACCAACCCCCTAACAGTTTAAGAGCTATGCTGGAAACAGCATAGCACTCGTTCCTTTCGA	107
RBP_lib_1174	ACCGGCCAACATACCtatcttgtggaaaggacgaaacaccggTGTCAAGAAGCGAAGGTTCTGTTTAAGAGCTATGCTGGAAACAGCATAGCACTCGTTCCTTTCGA	107
RBP_lib_1175	ACCGGCCAACATACCtatcttgtggaaaggacgaaacaccggCGAAGGTTCTTGGAACAGAAGTTTAAGAGCTATGCTGGAAACAGCATAGCACTCGTTCCTTTCGA	107
RBP_lib_1176	ACCGGCCAACATACCtatcttgtggaaaggacgaaacaccggGAACGAGCTTGGGTGGAGTTGTTTAAGAGCTATGCTGGAAACAGCATAGCACTCGTTCCTTTCGA	107
RBP_lib_1177	ACCGGCCAACATACCtatcttgtggaaaggacgaaacaccggCTGTTCTCCGGATTGGTCATGTTTAAGAGCTATGCTGGAAACAGCATAGCACTCGTTCCTTTCGA	107
RBP_lib_1178	ACCGGCCAACATACCtatcttgtggaaaggacgaaacaccggATCAGTCTGAATACCACCTCGTTTAAGAGCTATGCTGGAAACAGCATAGCACTCGTTCCTTTCGA	107
RBP_lib_1179	ACCGGCCAACATACCtatcttgtggaaaggacgaaacaccggTTGACAAGCCTGGTGCAGAAGTTTAAGAGCTATGCTGGAAACAGCATAGCACTCGTTCCTTTCGA	107
RBP_lib_1180	ACCGGCCAACATACCtatcttgtggaaaggacgaaacaccggGGACGCTATGGTTCCCGGCGGTTTAAGAGCTATGCTGGAAACAGCATAGCACTCGTTCCTTTCGA	107
RBP_lib_1181	ACCGGCCAACATACCtatcttgtggaaaggacgaaacaccggGTTACAGAGTGATAACGAAGGTTTAAGAGCTATGCTGGAAACAGCATAGCACTCGTTCCTTTCGA	107
RBP_lib_1182	ACCGGCCAACATACCtatcttgtggaaaggacgaaacaccggCGCTATGGTTCCCGGCGGGGGTTTAAGAGCTATGCTGGAAACAGCATAGCACTCGTTCCTTTCGA	107
RBP_lib_1183	ACCGGCCAACATACCtatcttgtggaaaggacgaaacaccggGGGACGCTATGGTTCCCGGCGTTTAAGAGCTATGCTGGAAACAGCATAGCACTCGTTCCTTTCGA	107
RBP_lib_1184	ACCGGCCAACATACCtatcttgtggaaaggacgaaacaccggCTCCAGGACCGTTCTGCACCGTTTAAGAGCTATGCTGGAAACAGCATAGCACTCGTTCCTTTCGA	107
RBP_lib_1185	ACCGGCCAACATACCtatcttgtggaaaggacgaaacaccggTAGTTCGCTCCTTCACCGAGGTTTAAGAGCTATGCTGGAAACAGCATAGCACTCGTTCCTTTCGA	107
RBP_lib_1186	ACCGGCCAACATACCtatcttgtggaaaggacgaaacaccggGGCCCTGCAACAGGATGATCGTTTAAGAGCTATGCTGGAAACAGCATAGCACTCGTTCCTTTCGA	107
RBP_lib_1187	ACCGGCCAACATACCtatcttgtggaaaggacgaaacaccggGGCACTGAGCCACTCGGTGAGTTTAAGAGCTATGCTGGAAACAGCATAGCACTCGTTCCTTTCGA	107
RBP_lib_1188	ACCGGCCAACATACCtatcttgtggaaaggacgaaacaccggGAAGGTCCACAGTGGTTATTGTTTAAGAGCTATGCTGGAAACAGCATAGCACTCGTTCCTTTCGA	107
RBP_lib_1189	ACCGGCCAACATACCtatcttgtggaaaggacgaaacaccggTGTCACCTATACCGACCGCTGTTTAAGAGCTATGCTGGAAACAGCATAGCACTCGTTCCTTTCGA	107
RBP_lib_1190	ACCGGCCAACATACCtatcttgtggaaaggacgaaacaccggATCCTGTTGCAGGGCCTCCAGTTTAAGAGCTATGCTGGAAACAGCATAGCACTCGTTCCTTTCGA	107
RBP_lib_1191	ACCGGCCAACATACCtatcttgtggaaaggacgaaacaccggGTCACCTATACCGACCGCTGGTTTAAGAGCTATGCTGGAAACAGCATAGCACTCGTTCCTTTCGA	107
RBP_lib_1192	ACCGGCCAACATACCtatcttgtggaaaggacgaaacaccggGCGGTCGGTATAGGTGACATGTTTAAGAGCTATGCTGGAAACAGCATAGCACTCGTTCCTTTCGA	107
RBP_lib_1193	ACCGGCCAACATACCtatcttgtggaaaggacgaaacaccggCAACTTCACGTCTCGATAGGGTTTAAGAGCTATGCTGGAAACAGCATAGCACTCGTTCCTTTCGA	107
RBP_lib_1194	ACCGGCCAACATACCtatcttgtggaaaggacgaaacaccggTTCACGTCTCGATAGGAGGCGTTTAAGAGCTATGCTGGAAACAGCATAGCACTCGTTCCTTTCGA	107
RBP_lib_1195	ACCGGCCAACATACCtatcttgtggaaaggacgaaacaccggAGGCAACTTCACGTCTCGATGTTTAAGAGCTATGCTGGAAACAGCATAGCACTCGTTCCTTTCGA	107
RBP_lib_1196	ACCGGCCAACATACCtatcttgtggaaaggacgaaacaccggTCGATTGTGGCCGCCTCCTTGTTTAAGAGCTATGCTGGAAACAGCATAGCACTCGTTCCTTTCGA	107
RBP_lib_1197	ACCGGCCAACATACCtatcttgtggaaaggacgaaacaccggGGCGGTGTCCCTGTCGATTGGTTTAAGAGCTATGCTGGAAACAGCATAGCACTCGTTCCTTTCGA	107
RBP_lib_1198	ACCGGCCAACATACCtatcttgtggaaaggacgaaacaccggGGAGGCGGCCACAATCGACAGTTTAAGAGCTATGCTGGAAACAGCATAGCACTCGTTCCTTTCGA	107
RBP_lib_1199	ACCGGCCAACATACCtatcttgtggaaaggacgaaacaccggTCACGTCTCGATAGGAGGCTGTTTAAGAGCTATGCTGGAAACAGCATAGCACTCGTTCCTTTCGA	107
RBP_lib_1200	ACCGGCCAACATACCtatcttgtggaaaggacgaaacaccggAGGAGGCGGCCACAATCGACGTTTAAGAGCTATGCTGGAAACAGCATAGCACTCGTTCCTTTCGA	107
RBP_lib_1201	ACCGGCCAACATACCtatcttgtggaaaggacgaaacaccggCGAGCGGACCACAGGCGCCGGTTTAAGAGCTATGCTGGAAACAGCATAGCACTCGTTCCTTTCGA	107
RBP_lib_1202	ACCGGCCAACATACCtatcttgtggaaaggacgaaacaccggCTCGGCGCCTGTGGTCCGCTGTTTAAGAGCTATGCTGGAAACAGCATAGCACTCGTTCCTTTCGA	107
RBP_lib_1203	ACCGGCCAACATACCtatcttgtggaaaggacgaaacaccggCGGCCACCACCGCAGGCGACGTTTAAGAGCTATGCTGGAAACAGCATAGCACTCGTTCCTTTCGA	107
RBP_lib_1204	ACCGGCCAACATACCtatcttgtggaaaggacgaaacaccggAGTTACTGCTCTTCCTAAAGGTTTAAGAGCTATGCTGGAAACAGCATAGCACTCGTTCCTTTCGA	107
RBP_lib_1205	ACCGGCCAACATACCtatcttgtggaaaggacgaaacaccggGGCCACCACCGCAGGCGACAGTTTAAGAGCTATGCTGGAAACAGCATAGCACTCGTTCCTTTCGA	107
RBP_lib_1206	ACCGGCCAACATACCtatcttgtggaaaggacgaaacaccggGGCACGGAAGGAGCTCCAAAGTTTAAGAGCTATGCTGGAAACAGCATAGCACTCGTTCCTTTCGA	107
RBP_lib_1207	ACCGGCCAACATACCtatcttgtggaaaggacgaaacaccggATGCTCAACACTTTGTTTATGTTTAAGAGCTATGCTGGAAACAGCATAGCACTCGTTCCTTTCGA	107
RBP_lib_1208	ACCGGCCAACATACCtatcttgtggaaaggacgaaacaccggTCAACACTTTGTTTATTGGCGTTTAAGAGCTATGCTGGAAACAGCATAGCACTCGTTCCTTTCGA	107
RBP_lib_1209	ACCGGCCAACATACCtatcttgtggaaaggacgaaacaccggCGGTGTCGAGACAGGTAGTAGTTTAAGAGCTATGCTGGAAACAGCATAGCACTCGTTCCTTTCGA	107
RBP_lib_1210	ACCGGCCAACATACCtatcttgtggaaaggacgaaacaccggCGGCCACGGTCACGGTGAGGGTTTAAGAGCTATGCTGGAAACAGCATAGCACTCGTTCCTTTCGA	107
RBP_lib_1211	ACCGGCCAACATACCtatcttgtggaaaggacgaaacaccggTCGACACCGGCTGAGCCACTGTTTAAGAGCTATGCTGGAAACAGCATAGCACTCGTTCCTTTCGA	107
RBP_lib_1212	ACCGGCCAACATACCtatcttgtggaaaggacgaaacaccggCCTCGGCCACGGTCACGGTGGTTTAAGAGCTATGCTGGAAACAGCATAGCACTCGTTCCTTTCGA	107
RBP_lib_1213	ACCGGCCAACATACCtatcttgtggaaaggacgaaacaccggACGGTGAGGTGGGCTGCCCTGTTTAAGAGCTATGCTGGAAACAGCATAGCACTCGTTCCTTTCGA	107
RBP_lib_1214	ACCGGCCAACATACCtatcttgtggaaaggacgaaacaccggGGCCACGGTCACGGTGAGGTGTTTAAGAGCTATGCTGGAAACAGCATAGCACTCGTTCCTTTCGA	107
RBP_lib_1215	ACCGGCCAACATACCtatcttgtggaaaggacgaaacaccggCATGGGGCCGGAGACCCGAGGTTTAAGAGCTATGCTGGAAACAGCATAGCACTCGTTCCTTTCGA	107
RBP_lib_1216	ACCGGCCAACATACCtatcttgtggaaaggacgaaacaccggCGGAAGAGGCGACCACAGGTGTTTAAGAGCTATGCTGGAAACAGCATAGCACTCGTTCCTTTCGA	107
RBP_lib_1217	ACCGGCCAACATACCtatcttgtggaaaggacgaaacaccggCGATAAGCTCGCTCAGTTTGGTTTAAGAGCTATGCTGGAAACAGCATAGCACTCGTTCCTTTCGA	107
RBP_lib_1218	ACCGGCCAACATACCtatcttgtggaaaggacgaaacaccggCGAGTTCGAGAAAATGACGAGTTTAAGAGCTATGCTGGAAACAGCATAGCACTCGTTCCTTTCGA	107
RBP_lib_1219	ACCGGCCAACATACCtatcttgtggaaaggacgaaacaccggCGGCTGTCGTTACTTGCTCCGTTTAAGAGCTATGCTGGAAACAGCATAGCACTCGTTCCTTTCGA	107
RBP_lib_1220	ACCGGCCAACATACCtatcttgtggaaaggacgaaacaccggGCTCAGTTTGTGGCTCGCAAGTTTAAGAGCTATGCTGGAAACAGCATAGCACTCGTTCCTTTCGA	107
RBP_lib_1221	ACCGGCCAACATACCtatcttgtggaaaggacgaaacaccggGAGAGACCTTCCGCGCGTCAGTTTAAGAGCTATGCTGGAAACAGCATAGCACTCGTTCCTTTCGA	107
RBP_lib_1222	ACCGGCCAACATACCtatcttgtggaaaggacgaaacaccggCGCAACCGCATCACTGCTGAGTTTAAGAGCTATGCTGGAAACAGCATAGCACTCGTTCCTTTCGA	107
RBP_lib_1223	ACCGGCCAACATACCtatcttgtggaaaggacgaaacaccggGGAGAGACCTTCCGCGCGTCGTTTAAGAGCTATGCTGGAAACAGCATAGCACTCGTTCCTTTCGA	107
RBP_lib_1224	ACCGGCCAACATACCtatcttgtggaaaggacgaaacaccggCGTCCATTGATGGGGTGCCCGTTTAAGAGCTATGCTGGAAACAGCATAGCACTCGTTCCTTTCGA	107
RBP_lib_1225	ACCGGCCAACATACCtatcttgtggaaaggacgaaacaccggGCGGAGTGCCGCTTCCTTCTGTTTAAGAGCTATGCTGGAAACAGCATAGCACTCGTTCCTTTCGA	107
RBP_lib_1226	ACCGGCCAACATACCtatcttgtggaaaggacgaaacaccggCGCGGAGTGCCGCTTCCTTCGTTTAAGAGCTATGCTGGAAACAGCATAGCACTCGTTCCTTTCGA	107
RBP_lib_1227	ACCGGCCAACATACCtatcttgtggaaaggacgaaacaccggCGCGCACTGGTCCAGCGCACGTTTAAGAGCTATGCTGGAAACAGCATAGCACTCGTTCCTTTCGA	107
RBP_lib_1228	ACCGGCCAACATACCtatcttgtggaaaggacgaaacaccggGGAAGCGGCACTCCGCGCACGTTTAAGAGCTATGCTGGAAACAGCATAGCACTCGTTCCTTTCGA	107
RBP_lib_1229	ACCGGCCAACATACCtatcttgtggaaaggacgaaacaccggAAATCCGGGGATGGATTGAGGTTTAAGAGCTATGCTGGAAACAGCATAGCACTCGTTCCTTTCGA	107
RBP_lib_1230	ACCGGCCAACATACCtatcttgtggaaaggacgaaacaccggTGGATTGAGCGGCACCCAGAGTTTAAGAGCTATGCTGGAAACAGCATAGCACTCGTTCCTTTCGA	107
RBP_lib_1231	ACCGGCCAACATACCtatcttgtggaaaggacgaaacaccggCCAAGCTATATCCTGTGCGCGTTTAAGAGCTATGCTGGAAACAGCATAGCACTCGTTCCTTTCGA	107
RBP_lib_1232	ACCGGCCAACATACCtatcttgtggaaaggacgaaacaccggAAGTATGGTGGCCCTCCACCGTTTAAGAGCTATGCTGGAAACAGCATAGCACTCGTTCCTTTCGA	107
RBP_lib_1233	ACCGGCCAACATACCtatcttgtggaaaggacgaaacaccggTGGGACCGGAGCCGAATCCGGTTTAAGAGCTATGCTGGAAACAGCATAGCACTCGTTCCTTTCGA	107
RBP_lib_1234	ACCGGCCAACATACCtatcttgtggaaaggacgaaacaccggCTCGGCTCCGACGCCGGACTGTTTAAGAGCTATGCTGGAAACAGCATAGCACTCGTTCCTTTCGA	107
RBP_lib_1235	ACCGGCCAACATACCtatcttgtggaaaggacgaaacaccggTCTGGACTCGGCTCCGACGCGTTTAAGAGCTATGCTGGAAACAGCATAGCACTCGTTCCTTTCGA	107
RBP_lib_1236	ACCGGCCAACATACCtatcttgtggaaaggacgaaacaccggCTGGGACCGGAGCCGAATCCGTTTAAGAGCTATGCTGGAAACAGCATAGCACTCGTTCCTTTCGA	107
RBP_lib_1237	ACCGGCCAACATACCtatcttgtggaaaggacgaaacaccggCCGTATCTGCGGCCGGAGCTGTTTAAGAGCTATGCTGGAAACAGCATAGCACTCGTTCCTTTCGA	107
RBP_lib_1238	ACCGGCCAACATACCtatcttgtggaaaggacgaaacaccggGCTGGATCCGAGTCCGGCGTGTTTAAGAGCTATGCTGGAAACAGCATAGCACTCGTTCCTTTCGA	107
RBP_lib_1239	ACCGGCCAACATACCtatcttgtggaaaggacgaaacaccggTCCGGCCGCAGATACGGCTCGTTTAAGAGCTATGCTGGAAACAGCATAGCACTCGTTCCTTTCGA	107
RBP_lib_1240	ACCGGCCAACATACCtatcttgtggaaaggacgaaacaccggGCCGTATCTGCGGCCGGAGCGTTTAAGAGCTATGCTGGAAACAGCATAGCACTCGTTCCTTTCGA	107
RBP_lib_1241	ACCGGCCAACATACCtatcttgtggaaaggacgaaacaccggGCATAGATTCAGTCACGTCGGTTTAAGAGCTATGCTGGAAACAGCATAGCACTCGTTCCTTTCGA	107
RBP_lib_1242	ACCGGCCAACATACCtatcttgtggaaaggacgaaacaccggCCCGACACACGCGGATGGAAGTTTAAGAGCTATGCTGGAAACAGCATAGCACTCGTTCCTTTCGA	107
RBP_lib_1243	ACCGGCCAACATACCtatcttgtggaaaggacgaaacaccggGGAAAGGATATTGCCGATCGGTTTAAGAGCTATGCTGGAAACAGCATAGCACTCGTTCCTTTCGA	107
RBP_lib_1244	ACCGGCCAACATACCtatcttgtggaaaggacgaaacaccggCATCCGCGTGTGTCGGGATGGTTTAAGAGCTATGCTGGAAACAGCATAGCACTCGTTCCTTTCGA	107
RBP_lib_1245	ACCGGCCAACATACCtatcttgtggaaaggacgaaacaccggTGGAAAGGATATTGCCGATCGTTTAAGAGCTATGCTGGAAACAGCATAGCACTCGTTCCTTTCGA	107
RBP_lib_1246	ACCGGCCAACATACCtatcttgtggaaaggacgaaacaccggAGCATAGATTCAGTCACGTCGTTTAAGAGCTATGCTGGAAACAGCATAGCACTCGTTCCTTTCGA	107
RBP_lib_1247	ACCGGCCAACATACCtatcttgtggaaaggacgaaacaccggGTGGCTACCCGGCGCTCTCTGTTTAAGAGCTATGCTGGAAACAGCATAGCACTCGTTCCTTTCGA	107
RBP_lib_1248	ACCGGCCAACATACCtatcttgtggaaaggacgaaacaccggCCTTTCCATCCGCGTGTGTCGTTTAAGAGCTATGCTGGAAACAGCATAGCACTCGTTCCTTTCGA	107
RBP_lib_1249	ACCGGCCAACATACCtatcttgtggaaaggacgaaacaccggGGGTTAGAATCTCCTCATACGTTTAAGAGCTATGCTGGAAACAGCATAGCACTCGTTCCTTTCGA	107
RBP_lib_1250	ACCGGCCAACATACCtatcttgtggaaaggacgaaacaccggGGTTAGAATCTCCTCATACAGTTTAAGAGCTATGCTGGAAACAGCATAGCACTCGTTCCTTTCGA	107
RBP_lib_1251	ACCGGCCAACATACCtatcttgtggaaaggacgaaacaccggTCGCCTGTCCGAATGTGGTAGTTTAAGAGCTATGCTGGAAACAGCATAGCACTCGTTCCTTTCGA	107
RBP_lib_1252	ACCGGCCAACATACCtatcttgtggaaaggacgaaacaccggCAATAGTCAAACCTTACTACGTTTAAGAGCTATGCTGGAAACAGCATAGCACTCGTTCCTTTCGA	107
RBP_lib_1253	ACCGGCCAACATACCtatcttgtggaaaggacgaaacaccggCTTCCTCGCCTGTCCGAATGGTTTAAGAGCTATGCTGGAAACAGCATAGCACTCGTTCCTTTCGA	107
RBP_lib_1254	ACCGGCCAACATACCtatcttgtggaaaggacgaaacaccggTGCCCTTACCACATTCGGACGTTTAAGAGCTATGCTGGAAACAGCATAGCACTCGTTCCTTTCGA	107
RBP_lib_1255	ACCGGCCAACATACCtatcttgtggaaaggacgaaacaccggTTACCACATTCGGACAGGCGGTTTAAGAGCTATGCTGGAAACAGCATAGCACTCGTTCCTTTCGA	107
RBP_lib_1256	ACCGGCCAACATACCtatcttgtggaaaggacgaaacaccggGTTAGAATCTCCTCATACAGGTTTAAGAGCTATGCTGGAAACAGCATAGCACTCGTTCCTTTCGA	107
RBP_lib_1257	ACCGGCCAACATACCtatcttgtggaaaggacgaaacaccggATCATCTGGGGTCACGGACCGTTTAAGAGCTATGCTGGAAACAGCATAGCACTCGTTCCTTTCGA	107
RBP_lib_1258	ACCGGCCAACATACCtatcttgtggaaaggacgaaacaccggGGTCCGTGACCCCAGATGATGTTTAAGAGCTATGCTGGAAACAGCATAGCACTCGTTCCTTTCGA	107
RBP_lib_1259	ACCGGCCAACATACCtatcttgtggaaaggacgaaacaccggGAGCTTCTCGCCGACAGATAGTTTAAGAGCTATGCTGGAAACAGCATAGCACTCGTTCCTTTCGA	107
RBP_lib_1260	ACCGGCCAACATACCtatcttgtggaaaggacgaaacaccggAAGGGGCAGGCCAATCATCTGTTTAAGAGCTATGCTGGAAACAGCATAGCACTCGTTCCTTTCGA	107
RBP_lib_1261	ACCGGCCAACATACCtatcttgtggaaaggacgaaacaccggCGGCTGTTGAAGAGATGGATGTTTAAGAGCTATGCTGGAAACAGCATAGCACTCGTTCCTTTCGA	107
RBP_lib_1262	ACCGGCCAACATACCtatcttgtggaaaggacgaaacaccggCAGATATGGCCTCCGTGTACGTTTAAGAGCTATGCTGGAAACAGCATAGCACTCGTTCCTTTCGA	107
RBP_lib_1263	ACCGGCCAACATACCtatcttgtggaaaggacgaaacaccggCGAGCAAAAAGCACACCGCTGTTTAAGAGCTATGCTGGAAACAGCATAGCACTCGTTCCTTTCGA	107
RBP_lib_1264	ACCGGCCAACATACCtatcttgtggaaaggacgaaacaccggTGGCGGACAGCTCCTTCTCCGTTTAAGAGCTATGCTGGAAACAGCATAGCACTCGTTCCTTTCGA	107
RBP_lib_1265	ACCGGCCAACATACCtatcttgtggaaaggacgaaacaccggGCCGACCATGCTACTACGAGGTTTAAGAGCTATGCTGGAAACAGCATAGCACTCGTTCCTTTCGA	107
RBP_lib_1266	ACCGGCCAACATACCtatcttgtggaaaggacgaaacaccggTCCTCTCGTAGTAGCATGGTGTTTAAGAGCTATGCTGGAAACAGCATAGCACTCGTTCCTTTCGA	107
RBP_lib_1267	ACCGGCCAACATACCtatcttgtggaaaggacgaaacaccggTAGCATGGTCGGCCCAGCTCGTTTAAGAGCTATGCTGGAAACAGCATAGCACTCGTTCCTTTCGA	107
RBP_lib_1268	ACCGGCCAACATACCtatcttgtggaaaggacgaaacaccggACTCGCCGGCCACGCGTGCAGTTTAAGAGCTATGCTGGAAACAGCATAGCACTCGTTCCTTTCGA	107
RBP_lib_1269	ACCGGCCAACATACCtatcttgtggaaaggacgaaacaccggATTCTCCTCTCGTAGTAGCAGTTTAAGAGCTATGCTGGAAACAGCATAGCACTCGTTCCTTTCGA	107
RBP_lib_1270	ACCGGCCAACATACCtatcttgtggaaaggacgaaacaccggTAGTTGCTGCCGTGCACGCGGTTTAAGAGCTATGCTGGAAACAGCATAGCACTCGTTCCTTTCGA	107
RBP_lib_1271	ACCGGCCAACATACCtatcttgtggaaaggacgaaacaccggATGCGTATCCGTATGACAGAGTTTAAGAGCTATGCTGGAAACAGCATAGCACTCGTTCCTTTCGA	107
RBP_lib_1272	ACCGGCCAACATACCtatcttgtggaaaggacgaaacaccggTGCTGCCGTGCACGCGTGGCGTTTAAGAGCTATGCTGGAAACAGCATAGCACTCGTTCCTTTCGA	107
RBP_lib_1273	ACCGGCCAACATACCtatcttgtggaaaggacgaaacaccggCAGGTACCTTCTGTGCGAGCGTTTAAGAGCTATGCTGGAAACAGCATAGCACTCGTTCCTTTCGA	107
RBP_lib_1274	ACCGGCCAACATACCtatcttgtggaaaggacgaaacaccggCAAACGGCAGCGCGCGTCCTGTTTAAGAGCTATGCTGGAAACAGCATAGCACTCGTTCCTTTCGA	107
RBP_lib_1275	ACCGGCCAACATACCtatcttgtggaaaggacgaaacaccggCGCGCGCTGCCGTTTGAGCCGTTTAAGAGCTATGCTGGAAACAGCATAGCACTCGTTCCTTTCGA	107
RBP_lib_1276	ACCGGCCAACATACCtatcttgtggaaaggacgaaacaccggCGCGGTCGTCCAGGCTCAAAGTTTAAGAGCTATGCTGGAAACAGCATAGCACTCGTTCCTTTCGA	107
RBP_lib_1277	ACCGGCCAACATACCtatcttgtggaaaggacgaaacaccggCGGACACCAGCTCGCACAGAGTTTAAGAGCTATGCTGGAAACAGCATAGCACTCGTTCCTTTCGA	107
RBP_lib_1278	ACCGGCCAACATACCtatcttgtggaaaggacgaaacaccggAGCCTGGACGACCGCGTGCTGTTTAAGAGCTATGCTGGAAACAGCATAGCACTCGTTCCTTTCGA	107
RBP_lib_1279	ACCGGCCAACATACCtatcttgtggaaaggacgaaacaccggGGTCCGCGACACGATCGCCCGTTTAAGAGCTATGCTGGAAACAGCATAGCACTCGTTCCTTTCGA	107
RBP_lib_1280	ACCGGCCAACATACCtatcttgtggaaaggacgaaacaccggTGGTCCGCGACACGATCGCCGTTTAAGAGCTATGCTGGAAACAGCATAGCACTCGTTCCTTTCGA	107
RBP_lib_1281	ACCGGCCAACATACCtatcttgtggaaaggacgaaacaccggGCAGCACGGTCGGGGGGTTGGTTTAAGAGCTATGCTGGAAACAGCATAGCACTCGTTCCTTTCGA	107
RBP_lib_1282	ACCGGCCAACATACCtatcttgtggaaaggacgaaacaccggGCTGCGTGTTGTCCCGCGCCGTTTAAGAGCTATGCTGGAAACAGCATAGCACTCGTTCCTTTCGA	107
RBP_lib_1283	ACCGGCCAACATACCtatcttgtggaaaggacgaaacaccggGACCGAGCGCGTGGAGGAGGGTTTAAGAGCTATGCTGGAAACAGCATAGCACTCGTTCCTTTCGA	107
RBP_lib_1284	ACCGGCCAACATACCtatcttgtggaaaggacgaaacaccggCCGAAGCCAGCAGGTTGCCCGTTTAAGAGCTATGCTGGAAACAGCATAGCACTCGTTCCTTTCGA	107
RBP_lib_1285	ACCGGCCAACATACCtatcttgtggaaaggacgaaacaccggAGCGGGTGAGCGGCCGTGGTGTTTAAGAGCTATGCTGGAAACAGCATAGCACTCGTTCCTTTCGA	107
RBP_lib_1286	ACCGGCCAACATACCtatcttgtggaaaggacgaaacaccggGACCAACCTCGTGTGGGACGGTTTAAGAGCTATGCTGGAAACAGCATAGCACTCGTTCCTTTCGA	107
RBP_lib_1287	ACCGGCCAACATACCtatcttgtggaaaggacgaaacaccggCGCCTCGTCCCACACGAGGTGTTTAAGAGCTATGCTGGAAACAGCATAGCACTCGTTCCTTTCGA	107
RBP_lib_1288	ACCGGCCAACATACCtatcttgtggaaaggacgaaacaccggCTGCGTGTTGTCCCGCGCCAGTTTAAGAGCTATGCTGGAAACAGCATAGCACTCGTTCCTTTCGA	107
RBP_lib_1289	ACCGGCCAACATACCtatcttgtggaaaggacgaaacaccggAGACTGTGTGAAAAATGTGAGTTTAAGAGCTATGCTGGAAACAGCATAGCACTCGTTCCTTTCGA	107
RBP_lib_1290	ACCGGCCAACATACCtatcttgtggaaaggacgaaacaccggCTCATCACATATGCGGACCAGTTTAAGAGCTATGCTGGAAACAGCATAGCACTCGTTCCTTTCGA	107
RBP_lib_1291	ACCGGCCAACATACCtatcttgtggaaaggacgaaacaccggTGTGTAATCTGTGGCGGCCCGTTTAAGAGCTATGCTGGAAACAGCATAGCACTCGTTCCTTTCGA	107
RBP_lib_1292	ACCGGCCAACATACCtatcttgtggaaaggacgaaacaccggCAGGGCCGGTGTGTAATCTGGTTTAAGAGCTATGCTGGAAACAGCATAGCACTCGTTCCTTTCGA	107
RBP_lib_1293	ACCGGCCAACATACCtatcttgtggaaaggacgaaacaccggACTCATCACATATGCGGACCGTTTAAGAGCTATGCTGGAAACAGCATAGCACTCGTTCCTTTCGA	107
RBP_lib_1294	ACCGGCCAACATACCtatcttgtggaaaggacgaaacaccggGGCCGCCACAGATTACACACGTTTAAGAGCTATGCTGGAAACAGCATAGCACTCGTTCCTTTCGA	107
RBP_lib_1295	ACCGGCCAACATACCtatcttgtggaaaggacgaaacaccggAGTAGGCATCGGAGACTCCGGTTTAAGAGCTATGCTGGAAACAGCATAGCACTCGTTCCTTTCGA	107
RBP_lib_1296	ACCGGCCAACATACCtatcttgtggaaaggacgaaacaccggGGCCGGTGTGTAATCTGTGGGTTTAAGAGCTATGCTGGAAACAGCATAGCACTCGTTCCTTTCGA	107
RBP_lib_1297	ACCGGCCAACATACCtatcttgtggaaaggacgaaacaccggAACGACTCCCAGCACGACCCGTTTAAGAGCTATGCTGGAAACAGCATAGCACTCGTTCCTTTCGA	107
RBP_lib_1298	ACCGGCCAACATACCtatcttgtggaaaggacgaaacaccggGGAGTCGTTGGCGCTGCCCGGTTTAAGAGCTATGCTGGAAACAGCATAGCACTCGTTCCTTTCGA	107
RBP_lib_1299	ACCGGCCAACATACCtatcttgtggaaaggacgaaacaccggTTGGCGCTGCCCGAGGTGCCGTTTAAGAGCTATGCTGGAAACAGCATAGCACTCGTTCCTTTCGA	107
RBP_lib_1300	ACCGGCCAACATACCtatcttgtggaaaggacgaaacaccggTGTTTATCGGTGGACTGAGCGTTTAAGAGCTATGCTGGAAACAGCATAGCACTCGTTCCTTTCGA	107
RBP_lib_1301	ACCGGCCAACATACCtatcttgtggaaaggacgaaacaccggGCAAGTGTAGATAAAGTATTGTTTAAGAGCTATGCTGGAAACAGCATAGCACTCGTTCCTTTCGA	107
RBP_lib_1302	ACCGGCCAACATACCtatcttgtggaaaggacgaaacaccggGGGGTCGTGCTGGGAGTCGTGTTTAAGAGCTATGCTGGAAACAGCATAGCACTCGTTCCTTTCGA	107
RBP_lib_1303	ACCGGCCAACATACCtatcttgtggaaaggacgaaacaccggAATGGGAGCCCAGGCACCTCGTTTAAGAGCTATGCTGGAAACAGCATAGCACTCGTTCCTTTCGA	107
RBP_lib_1304	ACCGGCCAACATACCtatcttgtggaaaggacgaaacaccggAAATGGGAGCCCAGGCACCTGTTTAAGAGCTATGCTGGAAACAGCATAGCACTCGTTCCTTTCGA	107
RBP_lib_1305	ACCGGCCAACATACCtatcttgtggaaaggacgaaacaccggGGGGCGATTCCATCCCCGCTGTTTAAGAGCTATGCTGGAAACAGCATAGCACTCGTTCCTTTCGA	107
RBP_lib_1306	ACCGGCCAACATACCtatcttgtggaaaggacgaaacaccggGGTTCGGCTCCGAGCGGGGAGTTTAAGAGCTATGCTGGAAACAGCATAGCACTCGTTCCTTTCGA	107
RBP_lib_1307	ACCGGCCAACATACCtatcttgtggaaaggacgaaacaccggTGGAATCGCCCCCGCAGCCAGTTTAAGAGCTATGCTGGAAACAGCATAGCACTCGTTCCTTTCGA	107
RBP_lib_1308	ACCGGCCAACATACCtatcttgtggaaaggacgaaacaccggTCCCCGCTCGGAGCCGAACCGTTTAAGAGCTATGCTGGAAACAGCATAGCACTCGTTCCTTTCGA	107
RBP_lib_1309	ACCGGCCAACATACCtatcttgtggaaaggacgaaacaccggGCGCTTACGCTAGGCACGAAGTTTAAGAGCTATGCTGGAAACAGCATAGCACTCGTTCCTTTCGA	107
RBP_lib_1310	ACCGGCCAACATACCtatcttgtggaaaggacgaaacaccggTACGCTAGGCACGAAAGGTTGTTTAAGAGCTATGCTGGAAACAGCATAGCACTCGTTCCTTTCGA	107
RBP_lib_1311	ACCGGCCAACATACCtatcttgtggaaaggacgaaacaccggTCTCGGCAGCAGCAGCGACTGTTTAAGAGCTATGCTGGAAACAGCATAGCACTCGTTCCTTTCGA	107
RBP_lib_1312	ACCGGCCAACATACCtatcttgtggaaaggacgaaacaccggTAGGCACGAAAGGTTTGGCGGTTTAAGAGCTATGCTGGAAACAGCATAGCACTCGTTCCTTTCGA	107
RBP_lib_1313	ACCGGCCAACATACCtatcttgtggaaaggacgaaacaccggATCGAGCAGCAGAAGCGTAAGTTTAAGAGCTATGCTGGAAACAGCATAGCACTCGTTCCTTTCGA	107
RBP_lib_1314	ACCGGCCAACATACCtatcttgtggaaaggacgaaacaccggCTCATGTCGCGGCCGCTTGAGTTTAAGAGCTATGCTGGAAACAGCATAGCACTCGTTCCTTTCGA	107
RBP_lib_1315	ACCGGCCAACATACCtatcttgtggaaaggacgaaacaccggTCATGTCGCGGCCGCTTGACGTTTAAGAGCTATGCTGGAAACAGCATAGCACTCGTTCCTTTCGA	107
RBP_lib_1316	ACCGGCCAACATACCtatcttgtggaaaggacgaaacaccggGCGGCCGCTTGACGGGAACCGTTTAAGAGCTATGCTGGAAACAGCATAGCACTCGTTCCTTTCGA	107
RBP_lib_1317	ACCGGCCAACATACCtatcttgtggaaaggacgaaacaccggCGGCCGCTTGACGGGAACCAGTTTAAGAGCTATGCTGGAAACAGCATAGCACTCGTTCCTTTCGA	107
RBP_lib_1318	ACCGGCCAACATACCtatcttgtggaaaggacgaaacaccggGCCGCGACATGAGTTGCTGTGTTTAAGAGCTATGCTGGAAACAGCATAGCACTCGTTCCTTTCGA	107
RBP_lib_1319	ACCGGCCAACATACCtatcttgtggaaaggacgaaacaccggGATCGAGCAGCAGAAGCGTAGTTTAAGAGCTATGCTGGAAACAGCATAGCACTCGTTCCTTTCGA	107
RBP_lib_1320	ACCGGCCAACATACCtatcttgtggaaaggacgaaacaccggCCGCGACATGAGTTGCTGTTGTTTAAGAGCTATGCTGGAAACAGCATAGCACTCGTTCCTTTCGA	107
RBP_lib_1321	ACCGGCCAACATACCtatcttgtggaaaggacgaaacaccggTACACCCCTTGCAGTACAGGGTTTAAGAGCTATGCTGGAAACAGCATAGCACTCGTTCCTTTCGA	107
RBP_lib_1322	ACCGGCCAACATACCtatcttgtggaaaggacgaaacaccggACACCCCTTGCAGTACAGGTGTTTAAGAGCTATGCTGGAAACAGCATAGCACTCGTTCCTTTCGA	107
RBP_lib_1323	ACCGGCCAACATACCtatcttgtggaaaggacgaaacaccggAGGGCATAAGGAGGAGGTGGGTTTAAGAGCTATGCTGGAAACAGCATAGCACTCGTTCCTTTCGA	107
RBP_lib_1324	ACCGGCCAACATACCtatcttgtggaaaggacgaaacaccggCCTCTGGTGGATGTTCTCTGGTTTAAGAGCTATGCTGGAAACAGCATAGCACTCGTTCCTTTCGA	107
RBP_lib_1325	ACCGGCCAACATACCtatcttgtggaaaggacgaaacaccggCCACAGAGAACATCCACCAGGTTTAAGAGCTATGCTGGAAACAGCATAGCACTCGTTCCTTTCGA	107
RBP_lib_1326	ACCGGCCAACATACCtatcttgtggaaaggacgaaacaccggTGTAGCTTGCTCAGGACCTCGTTTAAGAGCTATGCTGGAAACAGCATAGCACTCGTTCCTTTCGA	107
RBP_lib_1327	ACCGGCCAACATACCtatcttgtggaaaggacgaaacaccggCTCTGGTGGATGTTCTCTGTGTTTAAGAGCTATGCTGGAAACAGCATAGCACTCGTTCCTTTCGA	107
RBP_lib_1328	ACCGGCCAACATACCtatcttgtggaaaggacgaaacaccggAGAACCCACCTGTACTGCAAGTTTAAGAGCTATGCTGGAAACAGCATAGCACTCGTTCCTTTCGA	107
RBP_lib_1329	ACCGGCCAACATACCtatcttgtggaaaggacgaaacaccggCGACGACGTGGAAGTCTGCGGTTTAAGAGCTATGCTGGAAACAGCATAGCACTCGTTCCTTTCGA	107
RBP_lib_1330	ACCGGCCAACATACCtatcttgtggaaaggacgaaacaccggGCAGACTTCCACGTCGTCGGGTTTAAGAGCTATGCTGGAAACAGCATAGCACTCGTTCCTTTCGA	107
RBP_lib_1331	ACCGGCCAACATACCtatcttgtggaaaggacgaaacaccggAGTCTGCGAGGACGACGACGGTTTAAGAGCTATGCTGGAAACAGCATAGCACTCGTTCCTTTCGA	107
RBP_lib_1332	ACCGGCCAACATACCtatcttgtggaaaggacgaaacaccggACGGCCGGCAGAAGGCGTGCGTTTAAGAGCTATGCTGGAAACAGCATAGCACTCGTTCCTTTCGA	107
RBP_lib_1333	ACCGGCCAACATACCtatcttgtggaaaggacgaaacaccggAGCCGGTGCGCCTCGAGGCAGTTTAAGAGCTATGCTGGAAACAGCATAGCACTCGTTCCTTTCGA	107
RBP_lib_1334	ACCGGCCAACATACCtatcttgtggaaaggacgaaacaccggCTCGAGGCACGGCCGGCAGAGTTTAAGAGCTATGCTGGAAACAGCATAGCACTCGTTCCTTTCGA	107
RBP_lib_1335	ACCGGCCAACATACCtatcttgtggaaaggacgaaacaccggGCGCATCAGCAGCGACCCGGGTTTAAGAGCTATGCTGGAAACAGCATAGCACTCGTTCCTTTCGA	107
RBP_lib_1336	ACCGGCCAACATACCtatcttgtggaaaggacgaaacaccggCTTGGGCGGCGGCTCTTCGGGTTTAAGAGCTATGCTGGAAACAGCATAGCACTCGTTCCTTTCGA	107
RBP_lib_1337	ACCGGCCAACATACCtatcttgtggaaaggacgaaacaccggAACGGATACATTCCGATACAGTTTAAGAGCTATGCTGGAAACAGCATAGCACTCGTTCCTTTCGA	107
RBP_lib_1338	ACCGGCCAACATACCtatcttgtggaaaggacgaaacaccggTGGCAGGGCCTTCCGTGTATGTTTAAGAGCTATGCTGGAAACAGCATAGCACTCGTTCCTTTCGA	107
RBP_lib_1339	ACCGGCCAACATACCtatcttgtggaaaggacgaaacaccggGATACATTCCGATACACGGAGTTTAAGAGCTATGCTGGAAACAGCATAGCACTCGTTCCTTTCGA	107
RBP_lib_1340	ACCGGCCAACATACCtatcttgtggaaaggacgaaacaccggGTATCGGAATGTATCCGTTAGTTTAAGAGCTATGCTGGAAACAGCATAGCACTCGTTCCTTTCGA	107
RBP_lib_1341	ACCGGCCAACATACCtatcttgtggaaaggacgaaacaccggTGAACAGGAAGCTCACTGGCGTTTAAGAGCTATGCTGGAAACAGCATAGCACTCGTTCCTTTCGA	107
RBP_lib_1342	ACCGGCCAACATACCtatcttgtggaaaggacgaaacaccggGCGGCATGTTAGATCCATAAGTTTAAGAGCTATGCTGGAAACAGCATAGCACTCGTTCCTTTCGA	107
RBP_lib_1343	ACCGGCCAACATACCtatcttgtggaaaggacgaaacaccggATTTGGCAGATTTCTTCAGGGTTTAAGAGCTATGCTGGAAACAGCATAGCACTCGTTCCTTTCGA	107
RBP_lib_1344	ACCGGCCAACATACCtatcttgtggaaaggacgaaacaccggCATATTTGGCAGATTTCTTCGTTTAAGAGCTATGCTGGAAACAGCATAGCACTCGTTCCTTTCGA	107
RBP_lib_1345	ACCGGCCAACATACCtatcttgtggaaaggacgaaacaccggAGCACCTTGGGTGAAGCATTGTTTAAGAGCTATGCTGGAAACAGCATAGCACTCGTTCCTTTCGA	107
RBP_lib_1346	ACCGGCCAACATACCtatcttgtggaaaggacgaaacaccggAACTGCTTCATCATGGATGCGTTTAAGAGCTATGCTGGAAACAGCATAGCACTCGTTCCTTTCGA	107
RBP_lib_1347	ACCGGCCAACATACCtatcttgtggaaaggacgaaacaccggATCTCGGAAAGGCCAAAGCCGTTTAAGAGCTATGCTGGAAACAGCATAGCACTCGTTCCTTTCGA	107
RBP_lib_1348	ACCGGCCAACATACCtatcttgtggaaaggacgaaacaccggAAGGAGATGCAATCTCGGAAGTTTAAGAGCTATGCTGGAAACAGCATAGCACTCGTTCCTTTCGA	107
RBP_lib_1349	ACCGGCCAACATACCtatcttgtggaaaggacgaaacaccggTTCGGGCGGGCTCTCTTTGGGTTTAAGAGCTATGCTGGAAACAGCATAGCACTCGTTCCTTTCGA	107
RBP_lib_1350	ACCGGCCAACATACCtatcttgtggaaaggacgaaacaccggCCCAAAGAGAGCCCGCCCGAGTTTAAGAGCTATGCTGGAAACAGCATAGCACTCGTTCCTTTCGA	107
RBP_lib_1351	ACCGGCCAACATACCtatcttgtggaaaggacgaaacaccggTCGCATTCTTCCAGTCTACAGTTTAAGAGCTATGCTGGAAACAGCATAGCACTCGTTCCTTTCGA	107
RBP_lib_1352	ACCGGCCAACATACCtatcttgtggaaaggacgaaacaccggCTCTCTCTAGTGATGATTTCGTTTAAGAGCTATGCTGGAAACAGCATAGCACTCGTTCCTTTCGA	107
RBP_lib_1353	ACCGGCCAACATACCtatcttgtggaaaggacgaaacaccggTATCTGAAGATAAGGTTGATGTTTAAGAGCTATGCTGGAAACAGCATAGCACTCGTTCCTTTCGA	107
RBP_lib_1354	ACCGGCCAACATACCtatcttgtggaaaggacgaaacaccggCGGATAGAAGGTTGTATTATGTTTAAGAGCTATGCTGGAAACAGCATAGCACTCGTTCCTTTCGA	107
RBP_lib_1355	ACCGGCCAACATACCtatcttgtggaaaggacgaaacaccggAGTTTCTCAGGGAAAGTCGGGTTTAAGAGCTATGCTGGAAACAGCATAGCACTCGTTCCTTTCGA	107
RBP_lib_1356	ACCGGCCAACATACCtatcttgtggaaaggacgaaacaccggTGCTGGCCGTCGGAAGCGGCGTTTAAGAGCTATGCTGGAAACAGCATAGCACTCGTTCCTTTCGA	107
RBP_lib_1357	ACCGGCCAACATACCtatcttgtggaaaggacgaaacaccggCGGCGTGCGACCCGGAGTCTGTTTAAGAGCTATGCTGGAAACAGCATAGCACTCGTTCCTTTCGA	107
RBP_lib_1358	ACCGGCCAACATACCtatcttgtggaaaggacgaaacaccggCCCGGGCGGAAAGGAAGTGCGTTTAAGAGCTATGCTGGAAACAGCATAGCACTCGTTCCTTTCGA	107
RBP_lib_1359	ACCGGCCAACATACCtatcttgtggaaaggacgaaacaccggAGGATGCTCGGTTGTGCGACGTTTAAGAGCTATGCTGGAAACAGCATAGCACTCGTTCCTTTCGA	107
RBP_lib_1360	ACCGGCCAACATACCtatcttgtggaaaggacgaaacaccggCCGGCGTGCGACCCGGAGTCGTTTAAGAGCTATGCTGGAAACAGCATAGCACTCGTTCCTTTCGA	107
RBP_lib_1361	ACCGGCCAACATACCtatcttgtggaaaggacgaaacaccggCCAGACTCCGGGTCGCACGCGTTTAAGAGCTATGCTGGAAACAGCATAGCACTCGTTCCTTTCGA	107
RBP_lib_1362	ACCGGCCAACATACCtatcttgtggaaaggacgaaacaccggGGCGTGCGACCCGGAGTCTGGTTTAAGAGCTATGCTGGAAACAGCATAGCACTCGTTCCTTTCGA	107
RBP_lib_1363	ACCGGCCAACATACCtatcttgtggaaaggacgaaacaccggGTCGGAGGAGCAGTTCGGAGGTTTAAGAGCTATGCTGGAAACAGCATAGCACTCGTTCCTTTCGA	107
RBP_lib_1364	ACCGGCCAACATACCtatcttgtggaaaggacgaaacaccggTGTCGGAGGAGCAGTTCGGAGTTTAAGAGCTATGCTGGAAACAGCATAGCACTCGTTCCTTTCGA	107
RBP_lib_1365	ACCGGCCAACATACCtatcttgtggaaaggacgaaacaccggATGTCGGAGGAGCAGTTCGGGTTTAAGAGCTATGCTGGAAACAGCATAGCACTCGTTCCTTTCGA	107
RBP_lib_1366	ACCGGCCAACATACCtatcttgtggaaaggacgaaacaccggAACGGCGGCGGTAGGCGGCTGTTTAAGAGCTATGCTGGAAACAGCATAGCACTCGTTCCTTTCGA	107
RBP_lib_1367	ACCGGCCAACATACCtatcttgtggaaaggacgaaacaccggTCTGCGGCCGGAGGCACCGAGTTTAAGAGCTATGCTGGAAACAGCATAGCACTCGTTCCTTTCGA	107
RBP_lib_1368	ACCGGCCAACATACCtatcttgtggaaaggacgaaacaccggGCGGCCGGAGGCACCGAAGGGTTTAAGAGCTATGCTGGAAACAGCATAGCACTCGTTCCTTTCGA	107
RBP_lib_1369	ACCGGCCAACATACCtatcttgtggaaaggacgaaacaccggGTTCTTACTGGCGTCGATCTGTTTAAGAGCTATGCTGGAAACAGCATAGCACTCGTTCCTTTCGA	107
RBP_lib_1370	ACCGGCCAACATACCtatcttgtggaaaggacgaaacaccggAGGAGCAGTTCGGAGGGGACGTTTAAGAGCTATGCTGGAAACAGCATAGCACTCGTTCCTTTCGA	107
RBP_lib_1371	ACCGGCCAACATACCtatcttgtggaaaggacgaaacaccggGTTATATCCCACCTCATTTAGTTTAAGAGCTATGCTGGAAACAGCATAGCACTCGTTCCTTTCGA	107
RBP_lib_1372	ACCGGCCAACATACCtatcttgtggaaaggacgaaacaccggGTGGCAGTGGAAAATGCGCTGTTTAAGAGCTATGCTGGAAACAGCATAGCACTCGTTCCTTTCGA	107
RBP_lib_1373	ACCGGCCAACATACCtatcttgtggaaaggacgaaacaccggAGTGGAAAATGCGCTCGGGCGTTTAAGAGCTATGCTGGAAACAGCATAGCACTCGTTCCTTTCGA	107
RBP_lib_1374	ACCGGCCAACATACCtatcttgtggaaaggacgaaacaccggTCTTCAGATAATCAGAGTGGGTTTAAGAGCTATGCTGGAAACAGCATAGCACTCGTTCCTTTCGA	107
RBP_lib_1375	ACCGGCCAACATACCtatcttgtggaaaggacgaaacaccggCTCTGTTCCTTAAATGAGGTGTTTAAGAGCTATGCTGGAAACAGCATAGCACTCGTTCCTTTCGA	107
RBP_lib_1376	ACCGGCCAACATACCtatcttgtggaaaggacgaaacaccggGAGATCGTGGAAGTGGATCAGTTTAAGAGCTATGCTGGAAACAGCATAGCACTCGTTCCTTTCGA	107
RBP_lib_1377	ACCGGCCAACATACCtatcttgtggaaaggacgaaacaccggACTCCCACCAAGTGAACGATGTTTAAGAGCTATGCTGGAAACAGCATAGCACTCGTTCCTTTCGA	107
RBP_lib_1378	ACCGGCCAACATACCtatcttgtggaaaggacgaaacaccggTATGATGGCATTGGTGGCCGGTTTAAGAGCTATGCTGGAAACAGCATAGCACTCGTTCCTTTCGA	107
RBP_lib_1379	ACCGGCCAACATACCtatcttgtggaaaggacgaaacaccggGCATCAGTAGGCGGATGGTCGTTTAAGAGCTATGCTGGAAACAGCATAGCACTCGTTCCTTTCGA	107
RBP_lib_1380	ACCGGCCAACATACCtatcttgtggaaaggacgaaacaccggGGTGGTGGCTTAAGGTGCCGGTTTAAGAGCTATGCTGGAAACAGCATAGCACTCGTTCCTTTCGA	107
RBP_lib_1381	ACCGGCCAACATACCtatcttgtggaaaggacgaaacaccggGGATGGTCAGGGTTACGTTCGTTTAAGAGCTATGCTGGAAACAGCATAGCACTCGTTCCTTTCGA	107
RBP_lib_1382	ACCGGCCAACATACCtatcttgtggaaaggacgaaacaccggGTGATTGTAACGATTCTCTCGTTTAAGAGCTATGCTGGAAACAGCATAGCACTCGTTCCTTTCGA	107
RBP_lib_1383	ACCGGCCAACATACCtatcttgtggaaaggacgaaacaccggGAATCTAAGGTCTCGGAAGGGTTTAAGAGCTATGCTGGAAACAGCATAGCACTCGTTCCTTTCGA	107
RBP_lib_1384	ACCGGCCAACATACCtatcttgtggaaaggacgaaacaccggTATGATCGCGTACAAGTTTGGTTTAAGAGCTATGCTGGAAACAGCATAGCACTCGTTCCTTTCGA	107
RBP_lib_1385	ACCGGCCAACATACCtatcttgtggaaaggacgaaacaccggGATCGCGTACAAGTTTGAGGGTTTAAGAGCTATGCTGGAAACAGCATAGCACTCGTTCCTTTCGA	107
RBP_lib_1386	ACCGGCCAACATACCtatcttgtggaaaggacgaaacaccggCTTGTACGCGATCATAGCAAGTTTAAGAGCTATGCTGGAAACAGCATAGCACTCGTTCCTTTCGA	107
RBP_lib_1387	ACCGGCCAACATACCtatcttgtggaaaggacgaaacaccggGTTCCTCGAGCGTGCGGCCGGTTTAAGAGCTATGCTGGAAACAGCATAGCACTCGTTCCTTTCGA	107
RBP_lib_1388	ACCGGCCAACATACCtatcttgtggaaaggacgaaacaccggTCTCCACGGCCGCACGCTCGGTTTAAGAGCTATGCTGGAAACAGCATAGCACTCGTTCCTTTCGA	107
RBP_lib_1389	ACCGGCCAACATACCtatcttgtggaaaggacgaaacaccggGCAGAAGTTCCTCGAGCGTGGTTTAAGAGCTATGCTGGAAACAGCATAGCACTCGTTCCTTTCGA	107
RBP_lib_1390	ACCGGCCAACATACCtatcttgtggaaaggacgaaacaccggTATTGATGCTAATGCTCGACGTTTAAGAGCTATGCTGGAAACAGCATAGCACTCGTTCCTTTCGA	107
RBP_lib_1391	ACCGGCCAACATACCtatcttgtggaaaggacgaaacaccggAGAAACGTACCGGCCTAGTTGTTTAAGAGCTATGCTGGAAACAGCATAGCACTCGTTCCTTTCGA	107
RBP_lib_1392	ACCGGCCAACATACCtatcttgtggaaaggacgaaacaccggCTATTGATGCTAATGCTCGAGTTTAAGAGCTATGCTGGAAACAGCATAGCACTCGTTCCTTTCGA	107
RBP_lib_1393	ACCGGCCAACATACCtatcttgtggaaaggacgaaacaccggCGTTGGGCACAGAAACGTACGTTTAAGAGCTATGCTGGAAACAGCATAGCACTCGTTCCTTTCGA	107
RBP_lib_1394	ACCGGCCAACATACCtatcttgtggaaaggacgaaacaccggGGACAGTTCCACAAGGAACGGTTTAAGAGCTATGCTGGAAACAGCATAGCACTCGTTCCTTTCGA	107
RBP_lib_1395	ACCGGCCAACATACCtatcttgtggaaaggacgaaacaccggAAAAGCACCTGTCAGTCCTAGTTTAAGAGCTATGCTGGAAACAGCATAGCACTCGTTCCTTTCGA	107
RBP_lib_1396	ACCGGCCAACATACCtatcttgtggaaaggacgaaacaccggAATGGGCTTCAAGCGCATGAGTTTAAGAGCTATGCTGGAAACAGCATAGCACTCGTTCCTTTCGA	107
RBP_lib_1397	ACCGGCCAACATACCtatcttgtggaaaggacgaaacaccggCAAAAGCACCTGTCAGTCCTGTTTAAGAGCTATGCTGGAAACAGCATAGCACTCGTTCCTTTCGA	107
RBP_lib_1398	ACCGGCCAACATACCtatcttgtggaaaggacgaaacaccggCTTCTGGCGGCTGCGAAAACGTTTAAGAGCTATGCTGGAAACAGCATAGCACTCGTTCCTTTCGA	107
RBP_lib_1399	ACCGGCCAACATACCtatcttgtggaaaggacgaaacaccggAAAGAGCATGGTTTGCCTACGTTTAAGAGCTATGCTGGAAACAGCATAGCACTCGTTCCTTTCGA	107
RBP_lib_1400	ACCGGCCAACATACCtatcttgtggaaaggacgaaacaccggTCTGGAAGGCAGGGACCTTCGTTTAAGAGCTATGCTGGAAACAGCATAGCACTCGTTCCTTTCGA	107
RBP_lib_1401	ACCGGCCAACATACCtatcttgtggaaaggacgaaacaccggAGGTCCCTGCCTTCCAGAAGGTTTAAGAGCTATGCTGGAAACAGCATAGCACTCGTTCCTTTCGA	107
RBP_lib_1402	ACCGGCCAACATACCtatcttgtggaaaggacgaaacaccggAAAAGAGCATGGTTTGCCTAGTTTAAGAGCTATGCTGGAAACAGCATAGCACTCGTTCCTTTCGA	107
RBP_lib_1403	ACCGGCCAACATACCtatcttgtggaaaggacgaaacaccggATGGCAGCCTCCACGGCGGCGTTTAAGAGCTATGCTGGAAACAGCATAGCACTCGTTCCTTTCGA	107
RBP_lib_1404	ACCGGCCAACATACCtatcttgtggaaaggacgaaacaccggGCCGGCCGAAGTGCAGATAAGTTTAAGAGCTATGCTGGAAACAGCATAGCACTCGTTCCTTTCGA	107
RBP_lib_1405	ACCGGCCAACATACCtatcttgtggaaaggacgaaacaccggGAAACAGCGCATTCCTAAAGGTTTAAGAGCTATGCTGGAAACAGCATAGCACTCGTTCCTTTCGA	107
RBP_lib_1406	ACCGGCCAACATACCtatcttgtggaaaggacgaaacaccggCTGTTTCCCGGCCGCCGTGGGTTTAAGAGCTATGCTGGAAACAGCATAGCACTCGTTCCTTTCGA	107
RBP_lib_1407	ACCGGCCAACATACCtatcttgtggaaaggacgaaacaccggTTTAGGAATGCGCTGTTTCCGTTTAAGAGCTATGCTGGAAACAGCATAGCACTCGTTCCTTTCGA	107
RBP_lib_1408	ACCGGCCAACATACCtatcttgtggaaaggacgaaacaccggGCCGTTATCTGCACTTCGGCGTTTAAGAGCTATGCTGGAAACAGCATAGCACTCGTTCCTTTCGA	107
RBP_lib_1409	ACCGGCCAACATACCtatcttgtggaaaggacgaaacaccggGCGCTGTTTCCCGGCCGCCGGTTTAAGAGCTATGCTGGAAACAGCATAGCACTCGTTCCTTTCGA	107
RBP_lib_1410	ACCGGCCAACATACCtatcttgtggaaaggacgaaacaccggCTCGGCCGTTATCTGCACTTGTTTAAGAGCTATGCTGGAAACAGCATAGCACTCGTTCCTTTCGA	107
RBP_lib_1411	ACCGGCCAACATACCtatcttgtggaaaggacgaaacaccggCCGACACGGAGCGCATCCGCGTTTAAGAGCTATGCTGGAAACAGCATAGCACTCGTTCCTTTCGA	107
RBP_lib_1412	ACCGGCCAACATACCtatcttgtggaaaggacgaaacaccggCCGGCGGATGCGCTCCGTGTGTTTAAGAGCTATGCTGGAAACAGCATAGCACTCGTTCCTTTCGA	107
RBP_lib_1413	ACCGGCCAACATACCtatcttgtggaaaggacgaaacaccggCGGCGGATGCGCTCCGTGTCGTTTAAGAGCTATGCTGGAAACAGCATAGCACTCGTTCCTTTCGA	107
RBP_lib_1414	ACCGGCCAACATACCtatcttgtggaaaggacgaaacaccggCGACACGGAGCGCATCCGCCGTTTAAGAGCTATGCTGGAAACAGCATAGCACTCGTTCCTTTCGA	107
RBP_lib_1415	ACCGGCCAACATACCtatcttgtggaaaggacgaaacaccggAGGATCTGTTCCAAACCCGCGTTTAAGAGCTATGCTGGAAACAGCATAGCACTCGTTCCTTTCGA	107
RBP_lib_1416	ACCGGCCAACATACCtatcttgtggaaaggacgaaacaccggGCCCGCACTCTTCGATCTGCGTTTAAGAGCTATGCTGGAAACAGCATAGCACTCGTTCCTTTCGA	107
RBP_lib_1417	ACCGGCCAACATACCtatcttgtggaaaggacgaaacaccggGAACAATCGCTGGCGACGCCGTTTAAGAGCTATGCTGGAAACAGCATAGCACTCGTTCCTTTCGA	107
RBP_lib_1418	ACCGGCCAACATACCtatcttgtggaaaggacgaaacaccggCAGCGGTCCTGACCCGCAGAGTTTAAGAGCTATGCTGGAAACAGCATAGCACTCGTTCCTTTCGA	107
RBP_lib_1419	ACCGGCCAACATACCtatcttgtggaaaggacgaaacaccggGGCTACGAGAACTATGGTTAGTTTAAGAGCTATGCTGGAAACAGCATAGCACTCGTTCCTTTCGA	107
RBP_lib_1420	ACCGGCCAACATACCtatcttgtggaaaggacgaaacaccggGCAAAGTGGTTTCGGATCCTGTTTAAGAGCTATGCTGGAAACAGCATAGCACTCGTTCCTTTCGA	107
RBP_lib_1421	ACCGGCCAACATACCtatcttgtggaaaggacgaaacaccggATCGGCACTGGCGCTACCCGGTTTAAGAGCTATGCTGGAAACAGCATAGCACTCGTTCCTTTCGA	107
RBP_lib_1422	ACCGGCCAACATACCtatcttgtggaaaggacgaaacaccggGGCCATACCATACCCATAGTGTTTAAGAGCTATGCTGGAAACAGCATAGCACTCGTTCCTTTCGA	107
RBP_lib_1423	ACCGGCCAACATACCtatcttgtggaaaggacgaaacaccggGGATAAAACGGAATCGGCACGTTTAAGAGCTATGCTGGAAACAGCATAGCACTCGTTCCTTTCGA	107
RBP_lib_1424	ACCGGCCAACATACCtatcttgtggaaaggacgaaacaccggCATACCATACCCATAGTTGGGTTTAAGAGCTATGCTGGAAACAGCATAGCACTCGTTCCTTTCGA	107
RBP_lib_1425	ACCGGCCAACATACCtatcttgtggaaaggacgaaacaccggTGGCGCTACCCGAGGCACTAGTTTAAGAGCTATGCTGGAAACAGCATAGCACTCGTTCCTTTCGA	107
RBP_lib_1426	ACCGGCCAACATACCtatcttgtggaaaggacgaaacaccggGCGGCATCATATCTAAGCGCGTTTAAGAGCTATGCTGGAAACAGCATAGCACTCGTTCCTTTCGA	107
RBP_lib_1427	ACCGGCCAACATACCtatcttgtggaaaggacgaaacaccggGAGGCGTAGCAAGGCCGACGGTTTAAGAGCTATGCTGGAAACAGCATAGCACTCGTTCCTTTCGA	107
RBP_lib_1428	ACCGGCCAACATACCtatcttgtggaaaggacgaaacaccggGCGGTACATCGCCTCGGTGCGTTTAAGAGCTATGCTGGAAACAGCATAGCACTCGTTCCTTTCGA	107
RBP_lib_1429	ACCGGCCAACATACCtatcttgtggaaaggacgaaacaccggCGGTACATCGCCTCGGTGCAGTTTAAGAGCTATGCTGGAAACAGCATAGCACTCGTTCCTTTCGA	107
RBP_lib_1430	ACCGGCCAACATACCtatcttgtggaaaggacgaaacaccggGGCGATGTACCGCTCCACGTGTTTAAGAGCTATGCTGGAAACAGCATAGCACTCGTTCCTTTCGA	107
RBP_lib_1431	ACCGGCCAACATACCtatcttgtggaaaggacgaaacaccggCGTGGAGCGGTACATCGCCTGTTTAAGAGCTATGCTGGAAACAGCATAGCACTCGTTCCTTTCGA	107
RBP_lib_1432	ACCGGCCAACATACCtatcttgtggaaaggacgaaacaccggAACGGTAAAGCTCTACTAGTGTTTAAGAGCTATGCTGGAAACAGCATAGCACTCGTTCCTTTCGA	107
RBP_lib_1433	ACCGGCCAACATACCtatcttgtggaaaggacgaaacaccggGTAGCAAGGCCGACGTGGAGGTTTAAGAGCTATGCTGGAAACAGCATAGCACTCGTTCCTTTCGA	107
RBP_lib_1434	ACCGGCCAACATACCtatcttgtggaaaggacgaaacaccggTGACTGGCTAAGGCGATCGTGTTTAAGAGCTATGCTGGAAACAGCATAGCACTCGTTCCTTTCGA	107
RBP_lib_1435	ACCGGCCAACATACCtatcttgtggaaaggacgaaacaccggTCAGCCACAACGTGCTCCACGTTTAAGAGCTATGCTGGAAACAGCATAGCACTCGTTCCTTTCGA	107
RBP_lib_1436	ACCGGCCAACATACCtatcttgtggaaaggacgaaacaccggGGTGCGAGAGATTCGCGACAGTTTAAGAGCTATGCTGGAAACAGCATAGCACTCGTTCCTTTCGA	107
RBP_lib_1437	ACCGGCCAACATACCtatcttgtggaaaggacgaaacaccggTTCGCGACAAGGCCACGCGCGTTTAAGAGCTATGCTGGAAACAGCATAGCACTCGTTCCTTTCGA	107
RBP_lib_1438	ACCGGCCAACATACCtatcttgtggaaaggacgaaacaccggGGCGCCGGTGGAGCACGTTGGTTTAAGAGCTATGCTGGAAACAGCATAGCACTCGTTCCTTTCGA	107
RBP_lib_1439	ACCGGCCAACATACCtatcttgtggaaaggacgaaacaccggGAACATCTACACCATCCGGGGTTTAAGAGCTATGCTGGAAACAGCATAGCACTCGTTCCTTTCGA	107
RBP_lib_1440	ACCGGCCAACATACCtatcttgtggaaaggacgaaacaccggGAATCTCTCGCACCACCTCCGTTTAAGAGCTATGCTGGAAACAGCATAGCACTCGTTCCTTTCGA	107
RBP_lib_1441	ACCGGCCAACATACCtatcttgtggaaaggacgaaacaccggGCGACAAGGCCACGCGCAGGGTTTAAGAGCTATGCTGGAAACAGCATAGCACTCGTTCCTTTCGA	107
RBP_lib_1442	ACCGGCCAACATACCtatcttgtggaaaggacgaaacaccggCTCTCGCACCACCTCCCGGAGTTTAAGAGCTATGCTGGAAACAGCATAGCACTCGTTCCTTTCGA	107
RBP_lib_1443	ACCGGCCAACATACCtatcttgtggaaaggacgaaacaccggATCGTTGAGCGGCCGTATTCGTTTAAGAGCTATGCTGGAAACAGCATAGCACTCGTTCCTTTCGA	107
RBP_lib_1444	ACCGGCCAACATACCtatcttgtggaaaggacgaaacaccggTCACGCTCCATATCGTTGAGGTTTAAGAGCTATGCTGGAAACAGCATAGCACTCGTTCCTTTCGA	107
RBP_lib_1445	ACCGGCCAACATACCtatcttgtggaaaggacgaaacaccggGCATCGGGAAATCCGGAATAGTTTAAGAGCTATGCTGGAAACAGCATAGCACTCGTTCCTTTCGA	107
RBP_lib_1446	ACCGGCCAACATACCtatcttgtggaaaggacgaaacaccggAATACGGCCGCTCAACGATAGTTTAAGAGCTATGCTGGAAACAGCATAGCACTCGTTCCTTTCGA	107
RBP_lib_1447	ACCGGCCAACATACCtatcttgtggaaaggacgaaacaccggTCGTCGGAGCCGGTCCCCGAGTTTAAGAGCTATGCTGGAAACAGCATAGCACTCGTTCCTTTCGA	107
RBP_lib_1448	ACCGGCCAACATACCtatcttgtggaaaggacgaaacaccggGTCCGACTTGATCAGCTCGTGTTTAAGAGCTATGCTGGAAACAGCATAGCACTCGTTCCTTTCGA	107
RBP_lib_1449	ACCGGCCAACATACCtatcttgtggaaaggacgaaacaccggCGAGCTGATCAAGTCGGACCGTTTAAGAGCTATGCTGGAAACAGCATAGCACTCGTTCCTTTCGA	107
RBP_lib_1450	ACCGGCCAACATACCtatcttgtggaaaggacgaaacaccggCTTGATCAGCTCGTCGGAGCGTTTAAGAGCTATGCTGGAAACAGCATAGCACTCGTTCCTTTCGA	107
RBP_lib_1451	ACCGGCCAACATACCtatcttgtggaaaggacgaaacaccggACTGAAAATCGCCGCTCACGGTTTAAGAGCTATGCTGGAAACAGCATAGCACTCGTTCCTTTCGA	107
RBP_lib_1452	ACCGGCCAACATACCtatcttgtggaaaggacgaaacaccggAAAATCGCCGCTCACGAGGTGTTTAAGAGCTATGCTGGAAACAGCATAGCACTCGTTCCTTTCGA	107
RBP_lib_1453	ACCGGCCAACATACCtatcttgtggaaaggacgaaacaccggGTGGCTTCCAACCTCGTGAGGTTTAAGAGCTATGCTGGAAACAGCATAGCACTCGTTCCTTTCGA	107
RBP_lib_1454	ACCGGCCAACATACCtatcttgtggaaaggacgaaacaccggCCGCCTAAGAAGCTCCGGCTGTTTAAGAGCTATGCTGGAAACAGCATAGCACTCGTTCCTTTCGA	107
RBP_lib_1455	ACCGGCCAACATACCtatcttgtggaaaggacgaaacaccggCTACGCCGCCTAAGAAGCTCGTTTAAGAGCTATGCTGGAAACAGCATAGCACTCGTTCCTTTCGA	107
RBP_lib_1456	ACCGGCCAACATACCtatcttgtggaaaggacgaaacaccggCGCCTAAGAAGCTCCGGCTTGTTTAAGAGCTATGCTGGAAACAGCATAGCACTCGTTCCTTTCGA	107
RBP_lib_1457	ACCGGCCAACATACCtatcttgtggaaaggacgaaacaccggACGAGGTTGGAAGCCACCACGTTTAAGAGCTATGCTGGAAACAGCATAGCACTCGTTCCTTTCGA	107
RBP_lib_1458	ACCGGCCAACATACCtatcttgtggaaaggacgaaacaccggCCAAGCCGGAGCTTCTTAGGGTTTAAGAGCTATGCTGGAAACAGCATAGCACTCGTTCCTTTCGA	107
RBP_lib_1459	ACCGGCCAACATACCtatcttgtggaaaggacgaaacaccggCGACCTCCCTCCGTTGTTTCGTTTAAGAGCTATGCTGGAAACAGCATAGCACTCGTTCCTTTCGA	107
RBP_lib_1460	ACCGGCCAACATACCtatcttgtggaaaggacgaaacaccggCATGCGCTGTCCCCGGAGGGGTTTAAGAGCTATGCTGGAAACAGCATAGCACTCGTTCCTTTCGA	107
RBP_lib_1461	ACCGGCCAACATACCtatcttgtggaaaggacgaaacaccggGGGAGGTCGCCCCAAACTTGGTTTAAGAGCTATGCTGGAAACAGCATAGCACTCGTTCCTTTCGA	107
RBP_lib_1462	ACCGGCCAACATACCtatcttgtggaaaggacgaaacaccggTCCGAACTGCACTCTCTTGAGTTTAAGAGCTATGCTGGAAACAGCATAGCACTCGTTCCTTTCGA	107
RBP_lib_1463	ACCGGCCAACATACCtatcttgtggaaaggacgaaacaccggGGAGGTCGCCCCAAACTTGGGTTTAAGAGCTATGCTGGAAACAGCATAGCACTCGTTCCTTTCGA	107
RBP_lib_1464	ACCGGCCAACATACCtatcttgtggaaaggacgaaacaccggATGCGCTGTCCCCGGAGGGGGTTTAAGAGCTATGCTGGAAACAGCATAGCACTCGTTCCTTTCGA	107
RBP_lib_1465	ACCGGCCAACATACCtatcttgtggaaaggacgaaacaccggGCATGCGCTGTCCCCGGAGGGTTTAAGAGCTATGCTGGAAACAGCATAGCACTCGTTCCTTTCGA	107
RBP_lib_1466	ACCGGCCAACATACCtatcttgtggaaaggacgaaacaccggCGCTCAATCACCCCCTGCCGGTTTAAGAGCTATGCTGGAAACAGCATAGCACTCGTTCCTTTCGA	107
RBP_lib_1467	ACCGGCCAACATACCtatcttgtggaaaggacgaaacaccggATGATGCGCTGCCCCGCTGGGTTTAAGAGCTATGCTGGAAACAGCATAGCACTCGTTCCTTTCGA	107
RBP_lib_1468	ACCGGCCAACATACCtatcttgtggaaaggacgaaacaccggCCACTTCCGCACCGCCAGCGGTTTAAGAGCTATGCTGGAAACAGCATAGCACTCGTTCCTTTCGA	107
RBP_lib_1469	ACCGGCCAACATACCtatcttgtggaaaggacgaaacaccggTCCACTTCCGCACCGCCAGCGTTTAAGAGCTATGCTGGAAACAGCATAGCACTCGTTCCTTTCGA	107
RBP_lib_1470	ACCGGCCAACATACCtatcttgtggaaaggacgaaacaccggACCCGCCACAATTCTCCTACGTTTAAGAGCTATGCTGGAAACAGCATAGCACTCGTTCCTTTCGA	107
RBP_lib_1471	ACCGGCCAACATACCtatcttgtggaaaggacgaaacaccggGACCCGCCACAATTCTCCTAGTTTAAGAGCTATGCTGGAAACAGCATAGCACTCGTTCCTTTCGA	107
RBP_lib_1472	ACCGGCCAACATACCtatcttgtggaaaggacgaaacaccggCCCCGCTGGCGGTGCGGAAGGTTTAAGAGCTATGCTGGAAACAGCATAGCACTCGTTCCTTTCGA	107
RBP_lib_1473	ACCGGCCAACATACCtatcttgtggaaaggacgaaacaccggGCGGAGCTGTACGTGAAGCCGTTTAAGAGCTATGCTGGAAACAGCATAGCACTCGTTCCTTTCGA	107
RBP_lib_1474	ACCGGCCAACATACCtatcttgtggaaaggacgaaacaccggAGCCCGTAGGAGAATTGTGGGTTTAAGAGCTATGCTGGAAACAGCATAGCACTCGTTCCTTTCGA	107
RBP_lib_1475	ACCGGCCAACATACCtatcttgtggaaaggacgaaacaccggTTTGCCGTTGAGCTGCGCGAGTTTAAGAGCTATGCTGGAAACAGCATAGCACTCGTTCCTTTCGA	107
RBP_lib_1476	ACCGGCCAACATACCtatcttgtggaaaggacgaaacaccggAGACTACGCGTTTGTTCACAGTTTAAGAGCTATGCTGGAAACAGCATAGCACTCGTTCCTTTCGA	107
RBP_lib_1477	ACCGGCCAACATACCtatcttgtggaaaggacgaaacaccggCGCGTTTGTTCACATGGAGAGTTTAAGAGCTATGCTGGAAACAGCATAGCACTCGTTCCTTTCGA	107
RBP_lib_1478	ACCGGCCAACATACCtatcttgtggaaaggacgaaacaccggGAAGGGCAAGCGCATCAACGGTTTAAGAGCTATGCTGGAAACAGCATAGCACTCGTTCCTTTCGA	107
RBP_lib_1479	ACCGGCCAACATACCtatcttgtggaaaggacgaaacaccggGCTCAACGGCAAAGAAGTGAGTTTAAGAGCTATGCTGGAAACAGCATAGCACTCGTTCCTTTCGA	107
RBP_lib_1480	ACCGGCCAACATACCtatcttgtggaaaggacgaaacaccggCGGTCGCGACCAAAGAATGGGTTTAAGAGCTATGCTGGAAACAGCATAGCACTCGTTCCTTTCGA	107
RBP_lib_1481	ACCGGCCAACATACCtatcttgtggaaaggacgaaacaccggCAACGTGGAACTCTCAACCAGTTTAAGAGCTATGCTGGAAACAGCATAGCACTCGTTCCTTTCGA	107
RBP_lib_1482	ACCGGCCAACATACCtatcttgtggaaaggacgaaacaccggGAGCTGCGCGATGGCGGCTTGTTTAAGAGCTATGCTGGAAACAGCATAGCACTCGTTCCTTTCGA	107
RBP_lib_1483	ACCGGCCAACATACCtatcttgtggaaaggacgaaacaccggTAAGGGCGACGACTTACTCCGTTTAAGAGCTATGCTGGAAACAGCATAGCACTCGTTCCTTTCGA	107
RBP_lib_1484	ACCGGCCAACATACCtatcttgtggaaaggacgaaacaccggGCGACGACTTACTCCCGGCAGTTTAAGAGCTATGCTGGAAACAGCATAGCACTCGTTCCTTTCGA	107
RBP_lib_1485	ACCGGCCAACATACCtatcttgtggaaaggacgaaacaccggGGCGACGACTTACTCCCGGCGTTTAAGAGCTATGCTGGAAACAGCATAGCACTCGTTCCTTTCGA	107
RBP_lib_1486	ACCGGCCAACATACCtatcttgtggaaaggacgaaacaccggTCTTCCTGCCGTTGCGCTGCGTTTAAGAGCTATGCTGGAAACAGCATAGCACTCGTTCCTTTCGA	107
RBP_lib_1487	ACCGGCCAACATACCtatcttgtggaaaggacgaaacaccggATAAGGATCCAGCAGCGCAAGTTTAAGAGCTATGCTGGAAACAGCATAGCACTCGTTCCTTTCGA	107
RBP_lib_1488	ACCGGCCAACATACCtatcttgtggaaaggacgaaacaccggGGATCCAGCAGCGCAACGGCGTTTAAGAGCTATGCTGGAAACAGCATAGCACTCGTTCCTTTCGA	107
RBP_lib_1489	ACCGGCCAACATACCtatcttgtggaaaggacgaaacaccggCTGAGGACTACATTCATATAGTTTAAGAGCTATGCTGGAAACAGCATAGCACTCGTTCCTTTCGA	107
RBP_lib_1490	ACCGGCCAACATACCtatcttgtggaaaggacgaaacaccggGTCCGCAATGCCCTGCACAGGTTTAAGAGCTATGCTGGAAACAGCATAGCACTCGTTCCTTTCGA	107
RBP_lib_1491	ACCGGCCAACATACCtatcttgtggaaaggacgaaacaccggCTGCACTTCATCCGCGGAGCGTTTAAGAGCTATGCTGGAAACAGCATAGCACTCGTTCCTTTCGA	107
RBP_lib_1492	ACCGGCCAACATACCtatcttgtggaaaggacgaaacaccggAAAGCGCTGCACTTCATCCGGTTTAAGAGCTATGCTGGAAACAGCATAGCACTCGTTCCTTTCGA	107
RBP_lib_1493	ACCGGCCAACATACCtatcttgtggaaaggacgaaacaccggCGGAGAGGGCTTCGTGGTGAGTTTAAGAGCTATGCTGGAAACAGCATAGCACTCGTTCCTTTCGA	107
RBP_lib_1494	ACCGGCCAACATACCtatcttgtggaaaggacgaaacaccggTCATCCGCGGAGCAGGACCAGTTTAAGAGCTATGCTGGAAACAGCATAGCACTCGTTCCTTTCGA	107
RBP_lib_1495	ACCGGCCAACATACCtatcttgtggaaaggacgaaacaccggTTCATCCGCGGAGCAGGACCGTTTAAGAGCTATGCTGGAAACAGCATAGCACTCGTTCCTTTCGA	107
RBP_lib_1496	ACCGGCCAACATACCtatcttgtggaaaggacgaaacaccggAGAAGGCGGAGAGGGCTTCGGTTTAAGAGCTATGCTGGAAACAGCATAGCACTCGTTCCTTTCGA	107
RBP_lib_1497	ACCGGCCAACATACCtatcttgtggaaaggacgaaacaccggTCAACAAAAGCCTCGCCACTGTTTAAGAGCTATGCTGGAAACAGCATAGCACTCGTTCCTTTCGA	107
RBP_lib_1498	ACCGGCCAACATACCtatcttgtggaaaggacgaaacaccggTGAAGGTCCGGGGCTTGCCCGTTTAAGAGCTATGCTGGAAACAGCATAGCACTCGTTCCTTTCGA	107
RBP_lib_1499	ACCGGCCAACATACCtatcttgtggaaaggacgaaacaccggCTCTGCTTAGAAGCGGTTCGGTTTAAGAGCTATGCTGGAAACAGCATAGCACTCGTTCCTTTCGA	107
RBP_lib_1500	ACCGGCCAACATACCtatcttgtggaaaggacgaaacaccggTCTGCTTAGAAGCGGTTCGTGTTTAAGAGCTATGCTGGAAACAGCATAGCACTCGTTCCTTTCGA	107
RBP_lib_1501	ACCGGCCAACATACCtatcttgtggaaaggacgaaacaccggGTTCCCGGAGTCAACTGGTGGTTTAAGAGCTATGCTGGAAACAGCATAGCACTCGTTCCTTTCGA	107
RBP_lib_1502	ACCGGCCAACATACCtatcttgtggaaaggacgaaacaccggTGGAAACACAACTGTCTAATGTTTAAGAGCTATGCTGGAAACAGCATAGCACTCGTTCCTTTCGA	107
RBP_lib_1503	ACCGGCCAACATACCtatcttgtggaaaggacgaaacaccggGAGGAAGGTAGTTGACTATTGTTTAAGAGCTATGCTGGAAACAGCATAGCACTCGTTCCTTTCGA	107
RBP_lib_1504	ACCGGCCAACATACCtatcttgtggaaaggacgaaacaccggTCTGTGTTCCCGGAGTCAACGTTTAAGAGCTATGCTGGAAACAGCATAGCACTCGTTCCTTTCGA	107
RBP_lib_1505	ACCGGCCAACATACCtatcttgtggaaaggacgaaacaccggGTTTACAGTGGTTGGACCATGTTTAAGAGCTATGCTGGAAACAGCATAGCACTCGTTCCTTTCGA	107
RBP_lib_1506	ACCGGCCAACATACCtatcttgtggaaaggacgaaacaccggGCTCCTCACCAGTTGACTCCGTTTAAGAGCTATGCTGGAAACAGCATAGCACTCGTTCCTTTCGA	107
RBP_lib_1507	ACCGGCCAACATACCtatcttgtggaaaggacgaaacaccggTGCCCGACGAGCGGCACTTCGTTTAAGAGCTATGCTGGAAACAGCATAGCACTCGTTCCTTTCGA	107
RBP_lib_1508	ACCGGCCAACATACCtatcttgtggaaaggacgaaacaccggTTCCAGAAGTGCCGCTCGTCGTTTAAGAGCTATGCTGGAAACAGCATAGCACTCGTTCCTTTCGA	107
RBP_lib_1509	ACCGGCCAACATACCtatcttgtggaaaggacgaaacaccggCTTCCAGAAGTGCCGCTCGTGTTTAAGAGCTATGCTGGAAACAGCATAGCACTCGTTCCTTTCGA	107
RBP_lib_1510	ACCGGCCAACATACCtatcttgtggaaaggacgaaacaccggTGAACACGCTGCCCGACGAGGTTTAAGAGCTATGCTGGAAACAGCATAGCACTCGTTCCTTTCGA	107
RBP_lib_1511	ACCGGCCAACATACCtatcttgtggaaaggacgaaacaccggGCGGCACTTCTGGAAGAGCCGTTTAAGAGCTATGCTGGAAACAGCATAGCACTCGTTCCTTTCGA	107
RBP_lib_1512	ACCGGCCAACATACCtatcttgtggaaaggacgaaacaccggAGTTCCTGACGGAGCTGACCGTTTAAGAGCTATGCTGGAAACAGCATAGCACTCGTTCCTTTCGA	107
RBP_lib_1513	ACCGGCCAACATACCtatcttgtggaaaggacgaaacaccggACTCTTCCTCGGGATAGGTTGTTTAAGAGCTATGCTGGAAACAGCATAGCACTCGTTCCTTTCGA	107
RBP_lib_1514	ACCGGCCAACATACCtatcttgtggaaaggacgaaacaccggGTCGCACCAAACCTATCCCGGTTTAAGAGCTATGCTGGAAACAGCATAGCACTCGTTCCTTTCGA	107
RBP_lib_1515	ACCGGCCAACATACCtatcttgtggaaaggacgaaacaccggTTCCGATGGAAGTGTGGTGAGTTTAAGAGCTATGCTGGAAACAGCATAGCACTCGTTCCTTTCGA	107
RBP_lib_1516	ACCGGCCAACATACCtatcttgtggaaaggacgaaacaccggTGTACAGTCTTCCCGATTTGGTTTAAGAGCTATGCTGGAAACAGCATAGCACTCGTTCCTTTCGA	107
RBP_lib_1517	ACCGGCCAACATACCtatcttgtggaaaggacgaaacaccggCGATTAGGCCGGTTGGTATAGTTTAAGAGCTATGCTGGAAACAGCATAGCACTCGTTCCTTTCGA	107
RBP_lib_1518	ACCGGCCAACATACCtatcttgtggaaaggacgaaacaccggACTTCCATCGGAAAGGCCCCGTTTAAGAGCTATGCTGGAAACAGCATAGCACTCGTTCCTTTCGA	107
RBP_lib_1519	ACCGGCCAACATACCtatcttgtggaaaggacgaaacaccggACCAACCGGCCTAATCGTCGGTTTAAGAGCTATGCTGGAAACAGCATAGCACTCGTTCCTTTCGA	107
RBP_lib_1520	ACCGGCCAACATACCtatcttgtggaaaggacgaaacaccggTCACCACACTTCCATCGGAAGTTTAAGAGCTATGCTGGAAACAGCATAGCACTCGTTCCTTTCGA	107
RBP_lib_1521	ACCGGCCAACATACCtatcttgtggaaaggacgaaacaccggATACCAACCGGCCTAATCGTGTTTAAGAGCTATGCTGGAAACAGCATAGCACTCGTTCCTTTCGA	107
RBP_lib_1522	ACCGGCCAACATACCtatcttgtggaaaggacgaaacaccggACGATTAGGCCGGTTGGTATGTTTAAGAGCTATGCTGGAAACAGCATAGCACTCGTTCCTTTCGA	107
RBP_lib_1523	ACCGGCCAACATACCtatcttgtggaaaggacgaaacaccggCGGGGGTCACACTCTCGTTGGTTTAAGAGCTATGCTGGAAACAGCATAGCACTCGTTCCTTTCGA	107
RBP_lib_1524	ACCGGCCAACATACCtatcttgtggaaaggacgaaacaccggCTCGTCGGGGCAATCCACGAGTTTAAGAGCTATGCTGGAAACAGCATAGCACTCGTTCCTTTCGA	107
RBP_lib_1525	ACCGGCCAACATACCtatcttgtggaaaggacgaaacaccggTCATCGCCCAGTGCTCGTCGGTTTAAGAGCTATGCTGGAAACAGCATAGCACTCGTTCCTTTCGA	107
RBP_lib_1526	ACCGGCCAACATACCtatcttgtggaaaggacgaaacaccggTGGATTGCCCCGACGAGCACGTTTAAGAGCTATGCTGGAAACAGCATAGCACTCGTTCCTTTCGA	107
RBP_lib_1527	ACCGGCCAACATACCtatcttgtggaaaggacgaaacaccggAGCCGGATTTGACCAAGAACGTTTAAGAGCTATGCTGGAAACAGCATAGCACTCGTTCCTTTCGA	107
RBP_lib_1528	ACCGGCCAACATACCtatcttgtggaaaggacgaaacaccggTTCATCGCCCAGTGCTCGTCGTTTAAGAGCTATGCTGGAAACAGCATAGCACTCGTTCCTTTCGA	107
RBP_lib_1529	ACCGGCCAACATACCtatcttgtggaaaggacgaaacaccggGAGTGTGACCCCCGCAGACTGTTTAAGAGCTATGCTGGAAACAGCATAGCACTCGTTCCTTTCGA	107
RBP_lib_1530	ACCGGCCAACATACCtatcttgtggaaaggacgaaacaccggGGATTGCCCCGACGAGCACTGTTTAAGAGCTATGCTGGAAACAGCATAGCACTCGTTCCTTTCGA	107
RBP_lib_1531	ACCGGCCAACATACCtatcttgtggaaaggacgaaacaccggAACCGTGATGTTCAGTTTCGGTTTAAGAGCTATGCTGGAAACAGCATAGCACTCGTTCCTTTCGA	107
RBP_lib_1532	ACCGGCCAACATACCtatcttgtggaaaggacgaaacaccggCTTGAATCTCAGTAGCTGTAGTTTAAGAGCTATGCTGGAAACAGCATAGCACTCGTTCCTTTCGA	107
RBP_lib_1533	ACCGGCCAACATACCtatcttgtggaaaggacgaaacaccggTTCAGTTTCGAGGCAGAGTCGTTTAAGAGCTATGCTGGAAACAGCATAGCACTCGTTCCTTTCGA	107
RBP_lib_1534	ACCGGCCAACATACCtatcttgtggaaaggacgaaacaccggTGATACCCAAGCTAAAAACAGTTTAAGAGCTATGCTGGAAACAGCATAGCACTCGTTCCTTTCGA	107
RBP_lib_1535	ACCGGCCAACATACCtatcttgtggaaaggacgaaacaccggTCTTGAATCTCAGTAGCTGTGTTTAAGAGCTATGCTGGAAACAGCATAGCACTCGTTCCTTTCGA	107
RBP_lib_1536	ACCGGCCAACATACCtatcttgtggaaaggacgaaacaccggGCCGACCCAAGTCTTCAGCAGTTTAAGAGCTATGCTGGAAACAGCATAGCACTCGTTCCTTTCGA	107
RBP_lib_1537	ACCGGCCAACATACCtatcttgtggaaaggacgaaacaccggACAAAATGTACTCCAGAGAAGTTTAAGAGCTATGCTGGAAACAGCATAGCACTCGTTCCTTTCGA	107
RBP_lib_1538	ACCGGCCAACATACCtatcttgtggaaaggacgaaacaccggTGCCTCGAAACTGAACATCAGTTTAAGAGCTATGCTGGAAACAGCATAGCACTCGTTCCTTTCGA	107
RBP_lib_1539	ACCGGCCAACATACCtatcttgtggaaaggacgaaacaccggGCTGCGGTGCTGCCGACCCCGTTTAAGAGCTATGCTGGAAACAGCATAGCACTCGTTCCTTTCGA	107
RBP_lib_1540	ACCGGCCAACATACCtatcttgtggaaaggacgaaacaccggCGGCGATCCTCAGGTGGCTGGTTTAAGAGCTATGCTGGAAACAGCATAGCACTCGTTCCTTTCGA	107
RBP_lib_1541	ACCGGCCAACATACCtatcttgtggaaaggacgaaacaccggCGCAGCCACCTGAGGATCGCGTTTAAGAGCTATGCTGGAAACAGCATAGCACTCGTTCCTTTCGA	107
RBP_lib_1542	ACCGGCCAACATACCtatcttgtggaaaggacgaaacaccggGAGCGTCTGCAGCTGCGCGGGTTTAAGAGCTATGCTGGAAACAGCATAGCACTCGTTCCTTTCGA	107
RBP_lib_1543	ACCGGCCAACATACCtatcttgtggaaaggacgaaacaccggAAGTTCGGCGGCTCCGGCCAGTTTAAGAGCTATGCTGGAAACAGCATAGCACTCGTTCCTTTCGA	107
RBP_lib_1544	ACCGGCCAACATACCtatcttgtggaaaggacgaaacaccggCAAGTTCGGCGGCTCCGGCCGTTTAAGAGCTATGCTGGAAACAGCATAGCACTCGTTCCTTTCGA	107
RBP_lib_1545	ACCGGCCAACATACCtatcttgtggaaaggacgaaacaccggAGTTCGGCGGCTCCGGCCAGGTTTAAGAGCTATGCTGGAAACAGCATAGCACTCGTTCCTTTCGA	107
RBP_lib_1546	ACCGGCCAACATACCtatcttgtggaaaggacgaaacaccggGGCGGAGTCGGTCTTCCGCCGTTTAAGAGCTATGCTGGAAACAGCATAGCACTCGTTCCTTTCGA	107
RBP_lib_1547	ACCGGCCAACATACCtatcttgtggaaaggacgaaacaccggCACCAGGTTGAAAACGGTGCGTTTAAGAGCTATGCTGGAAACAGCATAGCACTCGTTCCTTTCGA	107
RBP_lib_1548	ACCGGCCAACATACCtatcttgtggaaaggacgaaacaccggTTTACTCGTCACAGCGTCATGTTTAAGAGCTATGCTGGAAACAGCATAGCACTCGTTCCTTTCGA	107
RBP_lib_1549	ACCGGCCAACATACCtatcttgtggaaaggacgaaacaccggCGGTGCAGGGCGTTGTGACAGTTTAAGAGCTATGCTGGAAACAGCATAGCACTCGTTCCTTTCGA	107
RBP_lib_1550	ACCGGCCAACATACCtatcttgtggaaaggacgaaacaccggCCAGGGCGGGAGCTGTCGGAGTTTAAGAGCTATGCTGGAAACAGCATAGCACTCGTTCCTTTCGA	107
RBP_lib_1551	ACCGGCCAACATACCtatcttgtggaaaggacgaaacaccggGGTTGCCCGACCTCCTCCTCGTTTAAGAGCTATGCTGGAAACAGCATAGCACTCGTTCCTTTCGA	107
RBP_lib_1552	ACCGGCCAACATACCtatcttgtggaaaggacgaaacaccggGAGTAAAGTGCTTCTGAACGGTTTAAGAGCTATGCTGGAAACAGCATAGCACTCGTTCCTTTCGA	107
RBP_lib_1553	ACCGGCCAACATACCtatcttgtggaaaggacgaaacaccggAGGAGGTCGGGCAACCAGGGGTTTAAGAGCTATGCTGGAAACAGCATAGCACTCGTTCCTTTCGA	107
RBP_lib_1554	ACCGGCCAACATACCtatcttgtggaaaggacgaaacaccggACCAGGTTGAAAACGGTGCAGTTTAAGAGCTATGCTGGAAACAGCATAGCACTCGTTCCTTTCGA	107
RBP_lib_1555	ACCGGCCAACATACCtatcttgtggaaaggacgaaacaccggGCTGGCTGCTTCACGGATCGGTTTAAGAGCTATGCTGGAAACAGCATAGCACTCGTTCCTTTCGA	107
RBP_lib_1556	ACCGGCCAACATACCtatcttgtggaaaggacgaaacaccggACTGCACAGAGCAACCAGAGGTTTAAGAGCTATGCTGGAAACAGCATAGCACTCGTTCCTTTCGA	107
RBP_lib_1557	ACCGGCCAACATACCtatcttgtggaaaggacgaaacaccggTAGGGGTTCTCCATTGGGACGTTTAAGAGCTATGCTGGAAACAGCATAGCACTCGTTCCTTTCGA	107
RBP_lib_1558	ACCGGCCAACATACCtatcttgtggaaaggacgaaacaccggAAGAATTTGACAACCGCGGCGTTTAAGAGCTATGCTGGAAACAGCATAGCACTCGTTCCTTTCGA	107
RBP_lib_1559	ACCGGCCAACATACCtatcttgtggaaaggacgaaacaccggGAGGAAGAATTTGACAACCGGTTTAAGAGCTATGCTGGAAACAGCATAGCACTCGTTCCTTTCGA	107
RBP_lib_1560	ACCGGCCAACATACCtatcttgtggaaaggacgaaacaccggATCCGTGAAGCAGCCAGCCGGTTTAAGAGCTATGCTGGAAACAGCATAGCACTCGTTCCTTTCGA	107
RBP_lib_1561	ACCGGCCAACATACCtatcttgtggaaaggacgaaacaccggTCCTTGTAGGGGTTCTCCATGTTTAAGAGCTATGCTGGAAACAGCATAGCACTCGTTCCTTTCGA	107
RBP_lib_1562	ACCGGCCAACATACCtatcttgtggaaaggacgaaacaccggTCTTAAGAGGCTCCTTGTAGGTTTAAGAGCTATGCTGGAAACAGCATAGCACTCGTTCCTTTCGA	107
RBP_lib_1563	ACCGGCCAACATACCtatcttgtggaaaggacgaaacaccggGGAGCTGCGACCCTACCAGTGTTTAAGAGCTATGCTGGAAACAGCATAGCACTCGTTCCTTTCGA	107
RBP_lib_1564	ACCGGCCAACATACCtatcttgtggaaaggacgaaacaccggTGGAGCTGCGACCCTACCAGGTTTAAGAGCTATGCTGGAAACAGCATAGCACTCGTTCCTTTCGA	107
RBP_lib_1565	ACCGGCCAACATACCtatcttgtggaaaggacgaaacaccggAGGGCAAGAATATCATTATAGTTTAAGAGCTATGCTGGAAACAGCATAGCACTCGTTCCTTTCGA	107
RBP_lib_1566	ACCGGCCAACATACCtatcttgtggaaaggacgaaacaccggCGGGTCTTCCCAGCACCCGTGTTTAAGAGCTATGCTGGAAACAGCATAGCACTCGTTCCTTTCGA	107
RBP_lib_1567	ACCGGCCAACATACCtatcttgtggaaaggacgaaacaccggTAAGATCACTTCCCACTGGTGTTTAAGAGCTATGCTGGAAACAGCATAGCACTCGTTCCTTTCGA	107
RBP_lib_1568	ACCGGCCAACATACCtatcttgtggaaaggacgaaacaccggTATCATTATATGGCTGCCCAGTTTAAGAGCTATGCTGGAAACAGCATAGCACTCGTTCCTTTCGA	107
RBP_lib_1569	ACCGGCCAACATACCtatcttgtggaaaggacgaaacaccggAAGATCACTTCCCACTGGTAGTTTAAGAGCTATGCTGGAAACAGCATAGCACTCGTTCCTTTCGA	107
RBP_lib_1570	ACCGGCCAACATACCtatcttgtggaaaggacgaaacaccggTATGGCTGCCCACGGGTGCTGTTTAAGAGCTATGCTGGAAACAGCATAGCACTCGTTCCTTTCGA	107
RBP_lib_1571	ACCGGCCAACATACCtatcttgtggaaaggacgaaacaccggTTCGCAACGTTCGTGATGATGTTTAAGAGCTATGCTGGAAACAGCATAGCACTCGTTCCTTTCGA	107
RBP_lib_1572	ACCGGCCAACATACCtatcttgtggaaaggacgaaacaccggGCAGCGGCACCAGCTTACGCGTTTAAGAGCTATGCTGGAAACAGCATAGCACTCGTTCCTTTCGA	107
RBP_lib_1573	ACCGGCCAACATACCtatcttgtggaaaggacgaaacaccggCAACATAGACATTCATTACGGTTTAAGAGCTATGCTGGAAACAGCATAGCACTCGTTCCTTTCGA	107
RBP_lib_1574	ACCGGCCAACATACCtatcttgtggaaaggacgaaacaccggGCGAAGCAGTGCTATGAGCGGTTTAAGAGCTATGCTGGAAACAGCATAGCACTCGTTCCTTTCGA	107
RBP_lib_1575	ACCGGCCAACATACCtatcttgtggaaaggacgaaacaccggCGTACTCGTCGTCCCACGTCGTTTAAGAGCTATGCTGGAAACAGCATAGCACTCGTTCCTTTCGA	107
RBP_lib_1576	ACCGGCCAACATACCtatcttgtggaaaggacgaaacaccggGAATCGGGTACTTCGTGTTGGTTTAAGAGCTATGCTGGAAACAGCATAGCACTCGTTCCTTTCGA	107
RBP_lib_1577	ACCGGCCAACATACCtatcttgtggaaaggacgaaacaccggGACGCAGGGCCCGCTGAATCGTTTAAGAGCTATGCTGGAAACAGCATAGCACTCGTTCCTTTCGA	107
RBP_lib_1578	ACCGGCCAACATACCtatcttgtggaaaggacgaaacaccggAGACGCAGGGCCCGCTGAATGTTTAAGAGCTATGCTGGAAACAGCATAGCACTCGTTCCTTTCGA	107
RBP_lib_1579	ACCGGCCAACATACCtatcttgtggaaaggacgaaacaccggCTTGGACTACGAAGACGACGGTTTAAGAGCTATGCTGGAAACAGCATAGCACTCGTTCCTTTCGA	107
RBP_lib_1580	ACCGGCCAACATACCtatcttgtggaaaggacgaaacaccggTCCCGCCAAGAAAGACGTCAGTTTAAGAGCTATGCTGGAAACAGCATAGCACTCGTTCCTTTCGA	107
RBP_lib_1581	ACCGGCCAACATACCtatcttgtggaaaggacgaaacaccggCCCTTGACGTCTTTCTTGGCGTTTAAGAGCTATGCTGGAAACAGCATAGCACTCGTTCCTTTCGA	107
RBP_lib_1582	ACCGGCCAACATACCtatcttgtggaaaggacgaaacaccggACGAGGTGGAGACAGCCGCTGTTTAAGAGCTATGCTGGAAACAGCATAGCACTCGTTCCTTTCGA	107
RBP_lib_1583	ACCGGCCAACATACCtatcttgtggaaaggacgaaacaccggGACGAGGTGGAGACAGCCGCGTTTAAGAGCTATGCTGGAAACAGCATAGCACTCGTTCCTTTCGA	107
RBP_lib_1584	ACCGGCCAACATACCtatcttgtggaaaggacgaaacaccggGTCTTTCTTGGCGGGAGCCTGTTTAAGAGCTATGCTGGAAACAGCATAGCACTCGTTCCTTTCGA	107
RBP_lib_1585	ACCGGCCAACATACCtatcttgtggaaaggacgaaacaccggCGATGTGGACAATGAGCTCTGTTTAAGAGCTATGCTGGAAACAGCATAGCACTCGTTCCTTTCGA	107
RBP_lib_1586	ACCGGCCAACATACCtatcttgtggaaaggacgaaacaccggCCCGCCAAGAAAGACGTCAAGTTTAAGAGCTATGCTGGAAACAGCATAGCACTCGTTCCTTTCGA	107
RBP_lib_1587	ACCGGCCAACATACCtatcttgtggaaaggacgaaacaccggGCTCATTCCATAGCGGTAGAGTTTAAGAGCTATGCTGGAAACAGCATAGCACTCGTTCCTTTCGA	107
RBP_lib_1588	ACCGGCCAACATACCtatcttgtggaaaggacgaaacaccggCTCATTCCATAGCGGTAGAAGTTTAAGAGCTATGCTGGAAACAGCATAGCACTCGTTCCTTTCGA	107
RBP_lib_1589	ACCGGCCAACATACCtatcttgtggaaaggacgaaacaccggTCCTCCCCCTTCTACCGCTAGTTTAAGAGCTATGCTGGAAACAGCATAGCACTCGTTCCTTTCGA	107
RBP_lib_1590	ACCGGCCAACATACCtatcttgtggaaaggacgaaacaccggCGCTATGGAATGAGCCGTCCGTTTAAGAGCTATGCTGGAAACAGCATAGCACTCGTTCCTTTCGA	107
RBP_lib_1591	ACCGGCCAACATACCtatcttgtggaaaggacgaaacaccggACTGGGCGCCGCCTGCTCCAGTTTAAGAGCTATGCTGGAAACAGCATAGCACTCGTTCCTTTCGA	107
RBP_lib_1592	ACCGGCCAACATACCtatcttgtggaaaggacgaaacaccggGAGCAGGCGGCGCCCAGTAGGTTTAAGAGCTATGCTGGAAACAGCATAGCACTCGTTCCTTTCGA	107
RBP_lib_1593	ACCGGCCAACATACCtatcttgtggaaaggacgaaacaccggAGTTTCGCTGCCGAACGACTGTTTAAGAGCTATGCTGGAAACAGCATAGCACTCGTTCCTTTCGA	107
RBP_lib_1594	ACCGGCCAACATACCtatcttgtggaaaggacgaaacaccggAGTCGTTCGGCAGCGAAACTGTTTAAGAGCTATGCTGGAAACAGCATAGCACTCGTTCCTTTCGA	107
RBP_lib_1595	ACCGGCCAACATACCtatcttgtggaaaggacgaaacaccggAGTGTGCGCGCTCCTCACAAGTTTAAGAGCTATGCTGGAAACAGCATAGCACTCGTTCCTTTCGA	107
RBP_lib_1596	ACCGGCCAACATACCtatcttgtggaaaggacgaaacaccggGCTACGCTCACATCATCACCGTTTAAGAGCTATGCTGGAAACAGCATAGCACTCGTTCCTTTCGA	107
RBP_lib_1597	ACCGGCCAACATACCtatcttgtggaaaggacgaaacaccggGCACAATTTCAGATTCACTCGTTTAAGAGCTATGCTGGAAACAGCATAGCACTCGTTCCTTTCGA	107
RBP_lib_1598	ACCGGCCAACATACCtatcttgtggaaaggacgaaacaccggACGCTCACATCATCACCAGGGTTTAAGAGCTATGCTGGAAACAGCATAGCACTCGTTCCTTTCGA	107
RBP_lib_1599	ACCGGCCAACATACCtatcttgtggaaaggacgaaacaccggGTGTGCGCGCTCCTCACAAAGTTTAAGAGCTATGCTGGAAACAGCATAGCACTCGTTCCTTTCGA	107
RBP_lib_1600	ACCGGCCAACATACCtatcttgtggaaaggacgaaacaccggACCATGGGATTTGAAGTGCCGTTTAAGAGCTATGCTGGAAACAGCATAGCACTCGTTCCTTTCGA	107
RBP_lib_1601	ACCGGCCAACATACCtatcttgtggaaaggacgaaacaccggTCCGGGAAGAAGCAGACCATGTTTAAGAGCTATGCTGGAAACAGCATAGCACTCGTTCCTTTCGA	107
RBP_lib_1602	ACCGGCCAACATACCtatcttgtggaaaggacgaaacaccggGTGCCGGTCTCAGGAATGTTGTTTAAGAGCTATGCTGGAAACAGCATAGCACTCGTTCCTTTCGA	107
RBP_lib_1603	ACCGGCCAACATACCtatcttgtggaaaggacgaaacaccggAGAGTGATAGAAGGAAGTCAGTTTAAGAGCTATGCTGGAAACAGCATAGCACTCGTTCCTTTCGA	107
RBP_lib_1604	ACCGGCCAACATACCtatcttgtggaaaggacgaaacaccggGACTCTAACACGTGAACAAAGTTTAAGAGCTATGCTGGAAACAGCATAGCACTCGTTCCTTTCGA	107
RBP_lib_1605	ACCGGCCAACATACCtatcttgtggaaaggacgaaacaccggTCGACCTTTCAGAAGCTTTAGTTTAAGAGCTATGCTGGAAACAGCATAGCACTCGTTCCTTTCGA	107
RBP_lib_1606	ACCGGCCAACATACCtatcttgtggaaaggacgaaacaccggGCTCCATTATGTCTCCCCAGGTTTAAGAGCTATGCTGGAAACAGCATAGCACTCGTTCCTTTCGA	107
RBP_lib_1607	ACCGGCCAACATACCtatcttgtggaaaggacgaaacaccggCTAACACGTGAACAAAAGGAGTTTAAGAGCTATGCTGGAAACAGCATAGCACTCGTTCCTTTCGA	107
RBP_lib_1608	ACCGGCCAACATACCtatcttgtggaaaggacgaaacaccggAATGGAGCTCGAGGCACCCTGTTTAAGAGCTATGCTGGAAACAGCATAGCACTCGTTCCTTTCGA	107
RBP_lib_1609	ACCGGCCAACATACCtatcttgtggaaaggacgaaacaccggAAACGAGTACCTTTGGTGAGGTTTAAGAGCTATGCTGGAAACAGCATAGCACTCGTTCCTTTCGA	107
RBP_lib_1610	ACCGGCCAACATACCtatcttgtggaaaggacgaaacaccggAAGGCACCATTCTGAATCAGGTTTAAGAGCTATGCTGGAAACAGCATAGCACTCGTTCCTTTCGA	107
RBP_lib_1611	ACCGGCCAACATACCtatcttgtggaaaggacgaaacaccggGACACGGGTCGACACAATATGTTTAAGAGCTATGCTGGAAACAGCATAGCACTCGTTCCTTTCGA	107
RBP_lib_1612	ACCGGCCAACATACCtatcttgtggaaaggacgaaacaccggTCGACCCGTGTCCAAGCATCGTTTAAGAGCTATGCTGGAAACAGCATAGCACTCGTTCCTTTCGA	107
RBP_lib_1613	ACCGGCCAACATACCtatcttgtggaaaggacgaaacaccggAATTCACCACGTTGTCTAAAGTTTAAGAGCTATGCTGGAAACAGCATAGCACTCGTTCCTTTCGA	107
RBP_lib_1614	ACCGGCCAACATACCtatcttgtggaaaggacgaaacaccggGTGGTGAATTGCTTATACCAGTTTAAGAGCTATGCTGGAAACAGCATAGCACTCGTTCCTTTCGA	107
RBP_lib_1615	ACCGGCCAACATACCtatcttgtggaaaggacgaaacaccggCTCTACACAAGTTGGGTCAGGTTTAAGAGCTATGCTGGAAACAGCATAGCACTCGTTCCTTTCGA	107
RBP_lib_1616	ACCGGCCAACATACCtatcttgtggaaaggacgaaacaccggGCTTGATTTCAGCCAAAAACGTTTAAGAGCTATGCTGGAAACAGCATAGCACTCGTTCCTTTCGA	107
RBP_lib_1617	ACCGGCCAACATACCtatcttgtggaaaggacgaaacaccggCAAGGTGGAAGATCCTTCCAGTTTAAGAGCTATGCTGGAAACAGCATAGCACTCGTTCCTTTCGA	107
RBP_lib_1618	ACCGGCCAACATACCtatcttgtggaaaggacgaaacaccggCAAGCAGCTGACGAGCTGCAGTTTAAGAGCTATGCTGGAAACAGCATAGCACTCGTTCCTTTCGA	107
RBP_lib_1619	ACCGGCCAACATACCtatcttgtggaaaggacgaaacaccggAACGAACTCACTGTCCTGATGTTTAAGAGCTATGCTGGAAACAGCATAGCACTCGTTCCTTTCGA	107
RBP_lib_1620	ACCGGCCAACATACCtatcttgtggaaaggacgaaacaccggACGAACTCACTGTCCTGATTGTTTAAGAGCTATGCTGGAAACAGCATAGCACTCGTTCCTTTCGA	107
RBP_lib_1621	ACCGGCCAACATACCtatcttgtggaaaggacgaaacaccggATCAGGACAGTGAGTTCGTTGTTTAAGAGCTATGCTGGAAACAGCATAGCACTCGTTCCTTTCGA	107
RBP_lib_1622	ACCGGCCAACATACCtatcttgtggaaaggacgaaacaccggACGTCTCTATGGTAATGTCTGTTTAAGAGCTATGCTGGAAACAGCATAGCACTCGTTCCTTTCGA	107
RBP_lib_1623	ACCGGCCAACATACCtatcttgtggaaaggacgaaacaccggGAGACGTTGAAAGCACTTACGTTTAAGAGCTATGCTGGAAACAGCATAGCACTCGTTCCTTTCGA	107
RBP_lib_1624	ACCGGCCAACATACCtatcttgtggaaaggacgaaacaccggATGCGACTGATGACTTGCACGTTTAAGAGCTATGCTGGAAACAGCATAGCACTCGTTCCTTTCGA	107
RBP_lib_1625	ACCGGCCAACATACCtatcttgtggaaaggacgaaacaccggTACAGAAATGACTACTGCGAGTTTAAGAGCTATGCTGGAAACAGCATAGCACTCGTTCCTTTCGA	107
RBP_lib_1626	ACCGGCCAACATACCtatcttgtggaaaggacgaaacaccggATTGGGATAGTAGAGAAAGCGTTTAAGAGCTATGCTGGAAACAGCATAGCACTCGTTCCTTTCGA	107
RBP_lib_1627	ACCGGCCAACATACCtatcttgtggaaaggacgaaacaccggGCGCACCAGAGAAGGTCGATGTTTAAGAGCTATGCTGGAAACAGCATAGCACTCGTTCCTTTCGA	107
RBP_lib_1628	ACCGGCCAACATACCtatcttgtggaaaggacgaaacaccggAGAATCCGATCGACCTTCTCGTTTAAGAGCTATGCTGGAAACAGCATAGCACTCGTTCCTTTCGA	107
RBP_lib_1629	ACCGGCCAACATACCtatcttgtggaaaggacgaaacaccggCTCGGGGCGGAGCTCACCAGGTTTAAGAGCTATGCTGGAAACAGCATAGCACTCGTTCCTTTCGA	107
RBP_lib_1630	ACCGGCCAACATACCtatcttgtggaaaggacgaaacaccggCCGACGATCTGGCAGTCCATGTTTAAGAGCTATGCTGGAAACAGCATAGCACTCGTTCCTTTCGA	107
RBP_lib_1631	ACCGGCCAACATACCtatcttgtggaaaggacgaaacaccggCAATGGACTGCCAGATCGTCGTTTAAGAGCTATGCTGGAAACAGCATAGCACTCGTTCCTTTCGA	107
RBP_lib_1632	ACCGGCCAACATACCtatcttgtggaaaggacgaaacaccggCCAATGGACTGCCAGATCGTGTTTAAGAGCTATGCTGGAAACAGCATAGCACTCGTTCCTTTCGA	107
RBP_lib_1633	ACCGGCCAACATACCtatcttgtggaaaggacgaaacaccggCACTGGTGAGCTCCGCCCCGGTTTAAGAGCTATGCTGGAAACAGCATAGCACTCGTTCCTTTCGA	107
RBP_lib_1634	ACCGGCCAACATACCtatcttgtggaaaggacgaaacaccggCAATTCTTCGTCCACCAAGCGTTTAAGAGCTATGCTGGAAACAGCATAGCACTCGTTCCTTTCGA	107
RBP_lib_1635	ACCGGCCAACATACCtatcttgtggaaaggacgaaacaccggCACTCGTGTGGATGCACGACGTTTAAGAGCTATGCTGGAAACAGCATAGCACTCGTTCCTTTCGA	107
RBP_lib_1636	ACCGGCCAACATACCtatcttgtggaaaggacgaaacaccggGCCGCACTACTGCGAGAGTTGTTTAAGAGCTATGCTGGAAACAGCATAGCACTCGTTCCTTTCGA	107
RBP_lib_1637	ACCGGCCAACATACCtatcttgtggaaaggacgaaacaccggGGCCGCACTACTGCGAGAGTGTTTAAGAGCTATGCTGGAAACAGCATAGCACTCGTTCCTTTCGA	107
RBP_lib_1638	ACCGGCCAACATACCtatcttgtggaaaggacgaaacaccggGCACTCGTGTGGATGCACGAGTTTAAGAGCTATGCTGGAAACAGCATAGCACTCGTTCCTTTCGA	107
RBP_lib_1639	ACCGGCCAACATACCtatcttgtggaaaggacgaaacaccggTGTCAAGAGAAGCACTCGTGGTTTAAGAGCTATGCTGGAAACAGCATAGCACTCGTTCCTTTCGA	107
RBP_lib_1640	ACCGGCCAACATACCtatcttgtggaaaggacgaaacaccggCTGGGCAACGCAGACGCTGCGTTTAAGAGCTATGCTGGAAACAGCATAGCACTCGTTCCTTTCGA	107
RBP_lib_1641	ACCGGCCAACATACCtatcttgtggaaaggacgaaacaccggACCCAACTCTCGCAGTAGTGGTTTAAGAGCTATGCTGGAAACAGCATAGCACTCGTTCCTTTCGA	107
RBP_lib_1642	ACCGGCCAACATACCtatcttgtggaaaggacgaaacaccggCACTGAGGGTACCTAACCTGGTTTAAGAGCTATGCTGGAAACAGCATAGCACTCGTTCCTTTCGA	107
RBP_lib_1643	ACCGGCCAACATACCtatcttgtggaaaggacgaaacaccggCGCTCGAACGCAGAAGAACAGTTTAAGAGCTATGCTGGAAACAGCATAGCACTCGTTCCTTTCGA	107
RBP_lib_1644	ACCGGCCAACATACCtatcttgtggaaaggacgaaacaccggTCCGCCTCATCCAAAGGAGAGTTTAAGAGCTATGCTGGAAACAGCATAGCACTCGTTCCTTTCGA	107
RBP_lib_1645	ACCGGCCAACATACCtatcttgtggaaaggacgaaacaccggGCCCTCTCCTTTGGATGAGGGTTTAAGAGCTATGCTGGAAACAGCATAGCACTCGTTCCTTTCGA	107
RBP_lib_1646	ACCGGCCAACATACCtatcttgtggaaaggacgaaacaccggGACCCCAGGGATGCACGTCAGTTTAAGAGCTATGCTGGAAACAGCATAGCACTCGTTCCTTTCGA	107
RBP_lib_1647	ACCGGCCAACATACCtatcttgtggaaaggacgaaacaccggAAGGTGGACTTACCCACAGAGTTTAAGAGCTATGCTGGAAACAGCATAGCACTCGTTCCTTTCGA	107
RBP_lib_1648	ACCGGCCAACATACCtatcttgtggaaaggacgaaacaccggCGTCAGGGTGGTAAACTCATGTTTAAGAGCTATGCTGGAAACAGCATAGCACTCGTTCCTTTCGA	107
RBP_lib_1649	ACCGGCCAACATACCtatcttgtggaaaggacgaaacaccggCGCAGCTTCGCTGGCTGTAGGTTTAAGAGCTATGCTGGAAACAGCATAGCACTCGTTCCTTTCGA	107
RBP_lib_1650	ACCGGCCAACATACCtatcttgtggaaaggacgaaacaccggTGACCCCAGGGATGCACGTCGTTTAAGAGCTATGCTGGAAACAGCATAGCACTCGTTCCTTTCGA	107
RBP_lib_1651	ACCGGCCAACATACCtatcttgtggaaaggacgaaacaccggGCGGACGCCAACCGTTCTCAGTTTAAGAGCTATGCTGGAAACAGCATAGCACTCGTTCCTTTCGA	107
RBP_lib_1652	ACCGGCCAACATACCtatcttgtggaaaggacgaaacaccggAACGGTTGGCGTCCGCCTGGGTTTAAGAGCTATGCTGGAAACAGCATAGCACTCGTTCCTTTCGA	107
RBP_lib_1653	ACCGGCCAACATACCtatcttgtggaaaggacgaaacaccggGAGAACGGTTGGCGTCCGCCGTTTAAGAGCTATGCTGGAAACAGCATAGCACTCGTTCCTTTCGA	107
RBP_lib_1654	ACCGGCCAACATACCtatcttgtggaaaggacgaaacaccggTAGGGGTACCGCCCCGAGGAGTTTAAGAGCTATGCTGGAAACAGCATAGCACTCGTTCCTTTCGA	107
RBP_lib_1655	ACCGGCCAACATACCtatcttgtggaaaggacgaaacaccggCTAGGGGTACCGCCCCGAGGGTTTAAGAGCTATGCTGGAAACAGCATAGCACTCGTTCCTTTCGA	107
RBP_lib_1656	ACCGGCCAACATACCtatcttgtggaaaggacgaaacaccggCGGGGCGGTACCCCTAGCCCGTTTAAGAGCTATGCTGGAAACAGCATAGCACTCGTTCCTTTCGA	107
RBP_lib_1657	ACCGGCCAACATACCtatcttgtggaaaggacgaaacaccggCGCTCTGGGCGCCTTGAGAAGTTTAAGAGCTATGCTGGAAACAGCATAGCACTCGTTCCTTTCGA	107
RBP_lib_1658	ACCGGCCAACATACCtatcttgtggaaaggacgaaacaccggTGAGTTGCGCGTGCGGCACCGTTTAAGAGCTATGCTGGAAACAGCATAGCACTCGTTCCTTTCGA	107
RBP_lib_1659	ACCGGCCAACATACCtatcttgtggaaaggacgaaacaccggCATTCGATCCTGGCCATAGGGTTTAAGAGCTATGCTGGAAACAGCATAGCACTCGTTCCTTTCGA	107
RBP_lib_1660	ACCGGCCAACATACCtatcttgtggaaaggacgaaacaccggGCCAGGATCGAATGTACCAAGTTTAAGAGCTATGCTGGAAACAGCATAGCACTCGTTCCTTTCGA	107
RBP_lib_1661	ACCGGCCAACATACCtatcttgtggaaaggacgaaacaccggACCGTTGGTACATTCGATCCGTTTAAGAGCTATGCTGGAAACAGCATAGCACTCGTTCCTTTCGA	107
RBP_lib_1662	ACCGGCCAACATACCtatcttgtggaaaggacgaaacaccggGTACATTCGATCCTGGCCATGTTTAAGAGCTATGCTGGAAACAGCATAGCACTCGTTCCTTTCGA	107
RBP_lib_1663	ACCGGCCAACATACCtatcttgtggaaaggacgaaacaccggGGGCTTGTACAGCCCTCCTAGTTTAAGAGCTATGCTGGAAACAGCATAGCACTCGTTCCTTTCGA	107
RBP_lib_1664	ACCGGCCAACATACCtatcttgtggaaaggacgaaacaccggGTACAAGCCCTAACCCCAGCGTTTAAGAGCTATGCTGGAAACAGCATAGCACTCGTTCCTTTCGA	107
RBP_lib_1665	ACCGGCCAACATACCtatcttgtggaaaggacgaaacaccggCATGCTGTCGAAGGAACCGTGTTTAAGAGCTATGCTGGAAACAGCATAGCACTCGTTCCTTTCGA	107
RBP_lib_1666	ACCGGCCAACATACCtatcttgtggaaaggacgaaacaccggACGGTTCCTTCGACAGCATGGTTTAAGAGCTATGCTGGAAACAGCATAGCACTCGTTCCTTTCGA	107
RBP_lib_1667	ACCGGCCAACATACCtatcttgtggaaaggacgaaacaccggGAACGCGGCCAAAGTTCTGAGTTTAAGAGCTATGCTGGAAACAGCATAGCACTCGTTCCTTTCGA	107
RBP_lib_1668	ACCGGCCAACATACCtatcttgtggaaaggacgaaacaccggGCGCTGCTCATTACTGACCAGTTTAAGAGCTATGCTGGAAACAGCATAGCACTCGTTCCTTTCGA	107
RBP_lib_1669	ACCGGCCAACATACCtatcttgtggaaaggacgaaacaccggAACCGCTTCCATTATAGCTGGTTTAAGAGCTATGCTGGAAACAGCATAGCACTCGTTCCTTTCGA	107
RBP_lib_1670	ACCGGCCAACATACCtatcttgtggaaaggacgaaacaccggTGTCCGAGAGTGGGTTCTCTGTTTAAGAGCTATGCTGGAAACAGCATAGCACTCGTTCCTTTCGA	107
RBP_lib_1671	ACCGGCCAACATACCtatcttgtggaaaggacgaaacaccggGGAAGCGGTTGTCCGAGAGTGTTTAAGAGCTATGCTGGAAACAGCATAGCACTCGTTCCTTTCGA	107
RBP_lib_1672	ACCGGCCAACATACCtatcttgtggaaaggacgaaacaccggAAGGACATAGTCCACTTTACGTTTAAGAGCTATGCTGGAAACAGCATAGCACTCGTTCCTTTCGA	107
RBP_lib_1673	ACCGGCCAACATACCtatcttgtggaaaggacgaaacaccggTAACTGCAAGCGAGTCTTTCGTTTAAGAGCTATGCTGGAAACAGCATAGCACTCGTTCCTTTCGA	107
RBP_lib_1674	ACCGGCCAACATACCtatcttgtggaaaggacgaaacaccggGATTGCCACTACTTATCAACGTTTAAGAGCTATGCTGGAAACAGCATAGCACTCGTTCCTTTCGA	107
RBP_lib_1675	ACCGGCCAACATACCtatcttgtggaaaggacgaaacaccggTCCGGGAAGATTAGATAGCCGTTTAAGAGCTATGCTGGAAACAGCATAGCACTCGTTCCTTTCGA	107
RBP_lib_1676	ACCGGCCAACATACCtatcttgtggaaaggacgaaacaccggGTAAAGTTGGGTGCCCTGACGTTTAAGAGCTATGCTGGAAACAGCATAGCACTCGTTCCTTTCGA	107
RBP_lib_1677	ACCGGCCAACATACCtatcttgtggaaaggacgaaacaccggAGTACGTTGCATGGTAAAGTGTTTAAGAGCTATGCTGGAAACAGCATAGCACTCGTTCCTTTCGA	107
RBP_lib_1678	ACCGGCCAACATACCtatcttgtggaaaggacgaaacaccggCCGGGAAGATTAGATAGCCTGTTTAAGAGCTATGCTGGAAACAGCATAGCACTCGTTCCTTTCGA	107
RBP_lib_1679	ACCGGCCAACATACCtatcttgtggaaaggacgaaacaccggGGATCACATCGACTGTAGACGTTTAAGAGCTATGCTGGAAACAGCATAGCACTCGTTCCTTTCGA	107
RBP_lib_1680	ACCGGCCAACATACCtatcttgtggaaaggacgaaacaccggCTGGGCTATAGAGATTAAACGTTTAAGAGCTATGCTGGAAACAGCATAGCACTCGTTCCTTTCGA	107
RBP_lib_1681	ACCGGCCAACATACCtatcttgtggaaaggacgaaacaccggCCCTACATCACCGAGCACACGTTTAAGAGCTATGCTGGAAACAGCATAGCACTCGTTCCTTTCGA	107
RBP_lib_1682	ACCGGCCAACATACCtatcttgtggaaaggacgaaacaccggCCCGGATGGTCTCTAAAAGAGTTTAAGAGCTATGCTGGAAACAGCATAGCACTCGTTCCTTTCGA	107
RBP_lib_1683	ACCGGCCAACATACCtatcttgtggaaaggacgaaacaccggTCTCACGGGGGCAACGTTCAGTTTAAGAGCTATGCTGGAAACAGCATAGCACTCGTTCCTTTCGA	107
RBP_lib_1684	ACCGGCCAACATACCtatcttgtggaaaggacgaaacaccggGCCACTTTGTGTCTCTCACGGTTTAAGAGCTATGCTGGAAACAGCATAGCACTCGTTCCTTTCGA	107
RBP_lib_1685	ACCGGCCAACATACCtatcttgtggaaaggacgaaacaccggAGCGTGAGCACGTTCCTCTCGTTTAAGAGCTATGCTGGAAACAGCATAGCACTCGTTCCTTTCGA	107
RBP_lib_1686	ACCGGCCAACATACCtatcttgtggaaaggacgaaacaccggCCACTTTGTGTCTCTCACGGGTTTAAGAGCTATGCTGGAAACAGCATAGCACTCGTTCCTTTCGA	107
RBP_lib_1687	ACCGGCCAACATACCtatcttgtggaaaggacgaaacaccggCCCCCGTGAGAGACACAAAGGTTTAAGAGCTATGCTGGAAACAGCATAGCACTCGTTCCTTTCGA	107
RBP_lib_1688	ACCGGCCAACATACCtatcttgtggaaaggacgaaacaccggAGCCGCATTTGTCCCTATGGGTTTAAGAGCTATGCTGGAAACAGCATAGCACTCGTTCCTTTCGA	107
RBP_lib_1689	ACCGGCCAACATACCtatcttgtggaaaggacgaaacaccggGGGGTGACAGGCGCTAAGTAGTTTAAGAGCTATGCTGGAAACAGCATAGCACTCGTTCCTTTCGA	107
RBP_lib_1690	ACCGGCCAACATACCtatcttgtggaaaggacgaaacaccggAATAGCCGCATTTGTCCCTAGTTTAAGAGCTATGCTGGAAACAGCATAGCACTCGTTCCTTTCGA	107
RBP_lib_1691	ACCGGCCAACATACCtatcttgtggaaaggacgaaacaccggCACGTCGTGTGCGCCCTGTCGTTTAAGAGCTATGCTGGAAACAGCATAGCACTCGTTCCTTTCGA	107
RBP_lib_1692	ACCGGCCAACATACCtatcttgtggaaaggacgaaacaccggGTCGTGTGCGCCCTGTCTGGGTTTAAGAGCTATGCTGGAAACAGCATAGCACTCGTTCCTTTCGA	107
RBP_lib_1693	ACCGGCCAACATACCtatcttgtggaaaggacgaaacaccggCGCTGTCCACACCGCCAGACGTTTAAGAGCTATGCTGGAAACAGCATAGCACTCGTTCCTTTCGA	107
RBP_lib_1694	ACCGGCCAACATACCtatcttgtggaaaggacgaaacaccggGTCTGGCGGTGTGGACAGCGGTTTAAGAGCTATGCTGGAAACAGCATAGCACTCGTTCCTTTCGA	107
RBP_lib_1695	ACCGGCCAACATACCtatcttgtggaaaggacgaaacaccggGTGCGCCCTGTCTGGCGGTGGTTTAAGAGCTATGCTGGAAACAGCATAGCACTCGTTCCTTTCGA	107
RBP_lib_1696	ACCGGCCAACATACCtatcttgtggaaaggacgaaacaccggTATGAAGAACTGGGACTCGCGTTTAAGAGCTATGCTGGAAACAGCATAGCACTCGTTCCTTTCGA	107
RBP_lib_1697	ACCGGCCAACATACCtatcttgtggaaaggacgaaacaccggTGGCGGTGTGGACAGCGCGGGTTTAAGAGCTATGCTGGAAACAGCATAGCACTCGTTCCTTTCGA	107
RBP_lib_1698	ACCGGCCAACATACCtatcttgtggaaaggacgaaacaccggGCGCTGCTGTTGCGGCGGAGGTTTAAGAGCTATGCTGGAAACAGCATAGCACTCGTTCCTTTCGA	107
RBP_lib_1699	ACCGGCCAACATACCtatcttgtggaaaggacgaaacaccggAGGGAACCGGCGTACGGTGTGTTTAAGAGCTATGCTGGAAACAGCATAGCACTCGTTCCTTTCGA	107
RBP_lib_1700	ACCGGCCAACATACCtatcttgtggaaaggacgaaacaccggCAGTAGCCAACACCGTACGCGTTTAAGAGCTATGCTGGAAACAGCATAGCACTCGTTCCTTTCGA	107
RBP_lib_1701	ACCGGCCAACATACCtatcttgtggaaaggacgaaacaccggAATCAGCTGGTAACTGGCCCGTTTAAGAGCTATGCTGGAAACAGCATAGCACTCGTTCCTTTCGA	107
RBP_lib_1702	ACCGGCCAACATACCtatcttgtggaaaggacgaaacaccggCGGAGGAGGGAACCGGCGTAGTTTAAGAGCTATGCTGGAAACAGCATAGCACTCGTTCCTTTCGA	107
RBP_lib_1703	ACCGGCCAACATACCtatcttgtggaaaggacgaaacaccggGCCCCAGACTACGAATCAGCGTTTAAGAGCTATGCTGGAAACAGCATAGCACTCGTTCCTTTCGA	107
RBP_lib_1704	ACCGGCCAACATACCtatcttgtggaaaggacgaaacaccggTTACCAGCTGATTCGTAGTCGTTTAAGAGCTATGCTGGAAACAGCATAGCACTCGTTCCTTTCGA	107
RBP_lib_1705	ACCGGCCAACATACCtatcttgtggaaaggacgaaacaccggCCGGAAGTCGCTTAGCATTGGTTTAAGAGCTATGCTGGAAACAGCATAGCACTCGTTCCTTTCGA	107
RBP_lib_1706	ACCGGCCAACATACCtatcttgtggaaaggacgaaacaccggGCTGATTCGTAGTCTGGGGCGTTTAAGAGCTATGCTGGAAACAGCATAGCACTCGTTCCTTTCGA	107
RBP_lib_1707	ACCGGCCAACATACCtatcttgtggaaaggacgaaacaccggAGCTCTGCGGATTTCGCGAGGTTTAAGAGCTATGCTGGAAACAGCATAGCACTCGTTCCTTTCGA	107
RBP_lib_1708	ACCGGCCAACATACCtatcttgtggaaaggacgaaacaccggCGATCCGCGAGACCCCGCCAGTTTAAGAGCTATGCTGGAAACAGCATAGCACTCGTTCCTTTCGA	107
RBP_lib_1709	ACCGGCCAACATACCtatcttgtggaaaggacgaaacaccggGATCCGCGAGACCCCGCCAGGTTTAAGAGCTATGCTGGAAACAGCATAGCACTCGTTCCTTTCGA	107
RBP_lib_1710	ACCGGCCAACATACCtatcttgtggaaaggacgaaacaccggCGAAATCCGCTCCCCTGGCGGTTTAAGAGCTATGCTGGAAACAGCATAGCACTCGTTCCTTTCGA	107
RBP_lib_1711	ACCGGCCAACATACCtatcttgtggaaaggacgaaacaccggATTTCGATCGCGTCTACAGCGTTTAAGAGCTATGCTGGAAACAGCATAGCACTCGTTCCTTTCGA	107
RBP_lib_1712	ACCGGCCAACATACCtatcttgtggaaaggacgaaacaccggGCGATCCGCGAGACCCCGCCGTTTAAGAGCTATGCTGGAAACAGCATAGCACTCGTTCCTTTCGA	107
RBP_lib_1713	ACCGGCCAACATACCtatcttgtggaaaggacgaaacaccggTCGCGAAATCCGCAGAGCTGGTTTAAGAGCTATGCTGGAAACAGCATAGCACTCGTTCCTTTCGA	107
RBP_lib_1714	ACCGGCCAACATACCtatcttgtggaaaggacgaaacaccggCAGCTCTGCGGATTTCGCGAGTTTAAGAGCTATGCTGGAAACAGCATAGCACTCGTTCCTTTCGA	107
RBP_lib_1715	ACCGGCCAACATACCtatcttgtggaaaggacgaaacaccggCGCAGCACACAGCATCACCCGTTTAAGAGCTATGCTGGAAACAGCATAGCACTCGTTCCTTTCGA	107
RBP_lib_1716	ACCGGCCAACATACCtatcttgtggaaaggacgaaacaccggTGTGTGCTGCGCGGGCTCTGGTTTAAGAGCTATGCTGGAAACAGCATAGCACTCGTTCCTTTCGA	107
RBP_lib_1717	ACCGGCCAACATACCtatcttgtggaaaggacgaaacaccggGGGTGATGCTGTGTGCTGCGGTTTAAGAGCTATGCTGGAAACAGCATAGCACTCGTTCCTTTCGA	107
RBP_lib_1718	ACCGGCCAACATACCtatcttgtggaaaggacgaaacaccggGAGATCCCAGAAGGCCAGTAGTTTAAGAGCTATGCTGGAAACAGCATAGCACTCGTTCCTTTCGA	107
RBP_lib_1719	ACCGGCCAACATACCtatcttgtggaaaggacgaaacaccggCATGGGGATGAGATCCCAGAGTTTAAGAGCTATGCTGGAAACAGCATAGCACTCGTTCCTTTCGA	107
RBP_lib_1720	ACCGGCCAACATACCtatcttgtggaaaggacgaaacaccggCCACCAGAGAGCTTCCTTACGTTTAAGAGCTATGCTGGAAACAGCATAGCACTCGTTCCTTTCGA	107
RBP_lib_1721	ACCGGCCAACATACCtatcttgtggaaaggacgaaacaccggGAGCTTCCTTACTGGCCTTCGTTTAAGAGCTATGCTGGAAACAGCATAGCACTCGTTCCTTTCGA	107
RBP_lib_1722	ACCGGCCAACATACCtatcttgtggaaaggacgaaacaccggACCTTCTTCTTCTTCCGCAGGTTTAAGAGCTATGCTGGAAACAGCATAGCACTCGTTCCTTTCGA	107
RBP_lib_1723	ACCGGCCAACATACCtatcttgtggaaaggacgaaacaccggCCTCTCCCGCGTGAGCCCGCGTTTAAGAGCTATGCTGGAAACAGCATAGCACTCGTTCCTTTCGA	107
RBP_lib_1724	ACCGGCCAACATACCtatcttgtggaaaggacgaaacaccggCCTGCGGGCTCACGCGGGAGGTTTAAGAGCTATGCTGGAAACAGCATAGCACTCGTTCCTTTCGA	107
RBP_lib_1725	ACCGGCCAACATACCtatcttgtggaaaggacgaaacaccggGCCCGCAGGAGAAGCGATGAGTTTAAGAGCTATGCTGGAAACAGCATAGCACTCGTTCCTTTCGA	107
RBP_lib_1726	ACCGGCCAACATACCtatcttgtggaaaggacgaaacaccggGCTTCTCCTGCGGGCTCACGGTTTAAGAGCTATGCTGGAAACAGCATAGCACTCGTTCCTTTCGA	107
RBP_lib_1727	ACCGGCCAACATACCtatcttgtggaaaggacgaaacaccggAAGTTGAATGGGTCGTCGGCGTTTAAGAGCTATGCTGGAAACAGCATAGCACTCGTTCCTTTCGA	107
RBP_lib_1728	ACCGGCCAACATACCtatcttgtggaaaggacgaaacaccggGGCTCACGCGGGAGAGGAGAGTTTAAGAGCTATGCTGGAAACAGCATAGCACTCGTTCCTTTCGA	107
RBP_lib_1729	ACCGGCCAACATACCtatcttgtggaaaggacgaaacaccggTTGAATGGGTCGTCGGCAGGGTTTAAGAGCTATGCTGGAAACAGCATAGCACTCGTTCCTTTCGA	107
RBP_lib_1730	ACCGGCCAACATACCtatcttgtggaaaggacgaaacaccggGCAAACGTCCAGTGATGCAGGTTTAAGAGCTATGCTGGAAACAGCATAGCACTCGTTCCTTTCGA	107
RBP_lib_1731	ACCGGCCAACATACCtatcttgtggaaaggacgaaacaccggAACGCAATGCGGTACATAAAGTTTAAGAGCTATGCTGGAAACAGCATAGCACTCGTTCCTTTCGA	107
RBP_lib_1732	ACCGGCCAACATACCtatcttgtggaaaggacgaaacaccggCAGATGCGGAGAACGCAATGGTTTAAGAGCTATGCTGGAAACAGCATAGCACTCGTTCCTTTCGA	107
RBP_lib_1733	ACCGGCCAACATACCtatcttgtggaaaggacgaaacaccggAGTACCGGGACCAGCACTTTGTTTAAGAGCTATGCTGGAAACAGCATAGCACTCGTTCCTTTCGA	107
RBP_lib_1734	ACCGGCCAACATACCtatcttgtggaaaggacgaaacaccggACGTGGAACTCAGCGAGTACGTTTAAGAGCTATGCTGGAAACAGCATAGCACTCGTTCCTTTCGA	107
RBP_lib_1735	ACCGGCCAACATACCtatcttgtggaaaggacgaaacaccggGTACCGGGACCAGCACTTTCGTTTAAGAGCTATGCTGGAAACAGCATAGCACTCGTTCCTTTCGA	107
RBP_lib_1736	ACCGGCCAACATACCtatcttgtggaaaggacgaaacaccggGCTGCGCAGCGACTCCTACGGTTTAAGAGCTATGCTGGAAACAGCATAGCACTCGTTCCTTTCGA	107
RBP_lib_1737	ACCGGCCAACATACCtatcttgtggaaaggacgaaacaccggGTACATAAACGGAACTCGTCGTTTAAGAGCTATGCTGGAAACAGCATAGCACTCGTTCCTTTCGA	107
RBP_lib_1738	ACCGGCCAACATACCtatcttgtggaaaggacgaaacaccggGTACTCGCTGAGTTCCACGTGTTTAAGAGCTATGCTGGAAACAGCATAGCACTCGTTCCTTTCGA	107
RBP_lib_1739	ACCGGCCAACATACCtatcttgtggaaaggacgaaacaccggAGGCTGGTTCTTCGGCGGCCGTTTAAGAGCTATGCTGGAAACAGCATAGCACTCGTTCCTTTCGA	107
RBP_lib_1740	ACCGGCCAACATACCtatcttgtggaaaggacgaaacaccggCGCATTTCTGTCAGCTCCGTGTTTAAGAGCTATGCTGGAAACAGCATAGCACTCGTTCCTTTCGA	107
RBP_lib_1741	ACCGGCCAACATACCtatcttgtggaaaggacgaaacaccggTTCGATCTTCTCCGTTCGGGGTTTAAGAGCTATGCTGGAAACAGCATAGCACTCGTTCCTTTCGA	107
RBP_lib_1742	ACCGGCCAACATACCtatcttgtggaaaggacgaaacaccggACTTCGATCTTCTCCGTTCGGTTTAAGAGCTATGCTGGAAACAGCATAGCACTCGTTCCTTTCGA	107
RBP_lib_1743	ACCGGCCAACATACCtatcttgtggaaaggacgaaacaccggGTTATCGTTAACCCCCCGAAGTTTAAGAGCTATGCTGGAAACAGCATAGCACTCGTTCCTTTCGA	107
RBP_lib_1744	ACCGGCCAACATACCtatcttgtggaaaggacgaaacaccggGGCTACCGCGGTGGGAAGGCGTTTAAGAGCTATGCTGGAAACAGCATAGCACTCGTTCCTTTCGA	107
RBP_lib_1745	ACCGGCCAACATACCtatcttgtggaaaggacgaaacaccggCTTCGATCTTCTCCGTTCGGGTTTAAGAGCTATGCTGGAAACAGCATAGCACTCGTTCCTTTCGA	107
RBP_lib_1746	ACCGGCCAACATACCtatcttgtggaaaggacgaaacaccggCCGCATTTCTGTCAGCTCCGGTTTAAGAGCTATGCTGGAAACAGCATAGCACTCGTTCCTTTCGA	107
RBP_lib_1747	ACCGGCCAACATACCtatcttgtggaaaggacgaaacaccggCCGAGATCCGAGCACCGGCGGTTTAAGAGCTATGCTGGAAACAGCATAGCACTCGTTCCTTTCGA	107
RBP_lib_1748	ACCGGCCAACATACCtatcttgtggaaaggacgaaacaccggTTGGGCCGAGATCCGAGCACGTTTAAGAGCTATGCTGGAAACAGCATAGCACTCGTTCCTTTCGA	107
RBP_lib_1749	ACCGGCCAACATACCtatcttgtggaaaggacgaaacaccggCCCCGCCGGTGCTCGGATCTGTTTAAGAGCTATGCTGGAAACAGCATAGCACTCGTTCCTTTCGA	107
RBP_lib_1750	ACCGGCCAACATACCtatcttgtggaaaggacgaaacaccggTGTTCGGGGACGCGACCTCGGTTTAAGAGCTATGCTGGAAACAGCATAGCACTCGTTCCTTTCGA	107
RBP_lib_1751	ACCGGCCAACATACCtatcttgtggaaaggacgaaacaccggGGCCGAGATCCGAGCACCGGGTTTAAGAGCTATGCTGGAAACAGCATAGCACTCGTTCCTTTCGA	107
RBP_lib_1752	ACCGGCCAACATACCtatcttgtggaaaggacgaaacaccggGCCGAGATCCGAGCACCGGCGTTTAAGAGCTATGCTGGAAACAGCATAGCACTCGTTCCTTTCGA	107
RBP_lib_1753	ACCGGCCAACATACCtatcttgtggaaaggacgaaacaccggCGCCTGCAGTTGCGGGGACTGTTTAAGAGCTATGCTGGAAACAGCATAGCACTCGTTCCTTTCGA	107
RBP_lib_1754	ACCGGCCAACATACCtatcttgtggaaaggacgaaacaccggACGAGTGTGCGGCGCAGGCCGTTTAAGAGCTATGCTGGAAACAGCATAGCACTCGTTCCTTTCGA	107
RBP_lib_1755	ACCGGCCAACATACCtatcttgtggaaaggacgaaacaccggTCGCGGGTATCGGAGCTGTTGTTTAAGAGCTATGCTGGAAACAGCATAGCACTCGTTCCTTTCGA	107
RBP_lib_1756	ACCGGCCAACATACCtatcttgtggaaaggacgaaacaccggCGGGTATCGGAGCTGTTCGGGTTTAAGAGCTATGCTGGAAACAGCATAGCACTCGTTCCTTTCGA	107
RBP_lib_1757	ACCGGCCAACATACCtatcttgtggaaaggacgaaacaccggCGCCGGCCCCCCGAGCTTTGGTTTAAGAGCTATGCTGGAAACAGCATAGCACTCGTTCCTTTCGA	107
RBP_lib_1758	ACCGGCCAACATACCtatcttgtggaaaggacgaaacaccggCCCGCAACTGCTGCTACCGCGTTTAAGAGCTATGCTGGAAACAGCATAGCACTCGTTCCTTTCGA	107
RBP_lib_1759	ACCGGCCAACATACCtatcttgtggaaaggacgaaacaccggGCTCAAAGCGGTACTGAGATGTTTAAGAGCTATGCTGGAAACAGCATAGCACTCGTTCCTTTCGA	107
RBP_lib_1760	ACCGGCCAACATACCtatcttgtggaaaggacgaaacaccggAGCAGTTGCGGGGGCCCAAAGTTTAAGAGCTATGCTGGAAACAGCATAGCACTCGTTCCTTTCGA	107
RBP_lib_1761	ACCGGCCAACATACCtatcttgtggaaaggacgaaacaccggCAGCAGTTGCGGGGGCCCAAGTTTAAGAGCTATGCTGGAAACAGCATAGCACTCGTTCCTTTCGA	107
RBP_lib_1762	ACCGGCCAACATACCtatcttgtggaaaggacgaaacaccggTGCTCAAAGCGGTACTGAGAGTTTAAGAGCTATGCTGGAAACAGCATAGCACTCGTTCCTTTCGA	107
RBP_lib_1763	ACCGGCCAACATACCtatcttgtggaaaggacgaaacaccggTGACACGTGGGGCCAGCAATGTTTAAGAGCTATGCTGGAAACAGCATAGCACTCGTTCCTTTCGA	107
RBP_lib_1764	ACCGGCCAACATACCtatcttgtggaaaggacgaaacaccggCCAAATTCAAGGTGACACGTGTTTAAGAGCTATGCTGGAAACAGCATAGCACTCGTTCCTTTCGA	107
RBP_lib_1765	ACCGGCCAACATACCtatcttgtggaaaggacgaaacaccggTCGGGAGAAGCATGCACCTCGTTTAAGAGCTATGCTGGAAACAGCATAGCACTCGTTCCTTTCGA	107
RBP_lib_1766	ACCGGCCAACATACCtatcttgtggaaaggacgaaacaccggCTGGGAACGCAGTGCGCGCGGTTTAAGAGCTATGCTGGAAACAGCATAGCACTCGTTCCTTTCGA	107
RBP_lib_1767	ACCGGCCAACATACCtatcttgtggaaaggacgaaacaccggCCCAAATTCAAGGTGACACGGTTTAAGAGCTATGCTGGAAACAGCATAGCACTCGTTCCTTTCGA	107
RBP_lib_1768	ACCGGCCAACATACCtatcttgtggaaaggacgaaacaccggAAAATCCGTCTGCTTAGCCGGTTTAAGAGCTATGCTGGAAACAGCATAGCACTCGTTCCTTTCGA	107
RBP_lib_1769	ACCGGCCAACATACCtatcttgtggaaaggacgaaacaccggGGACCCGAGAAAAACGGCGGGTTTAAGAGCTATGCTGGAAACAGCATAGCACTCGTTCCTTTCGA	107
RBP_lib_1770	ACCGGCCAACATACCtatcttgtggaaaggacgaaacaccggGACACGTGGGGCCAGCAATCGTTTAAGAGCTATGCTGGAAACAGCATAGCACTCGTTCCTTTCGA	107
RBP_lib_1771	ACCGGCCAACATACCtatcttgtggaaaggacgaaacaccggGAGCAGACGGACACGTCGGAGTTTAAGAGCTATGCTGGAAACAGCATAGCACTCGTTCCTTTCGA	107
RBP_lib_1772	ACCGGCCAACATACCtatcttgtggaaaggacgaaacaccggAGCAGACGGACACGTCGGATGTTTAAGAGCTATGCTGGAAACAGCATAGCACTCGTTCCTTTCGA	107
RBP_lib_1773	ACCGGCCAACATACCtatcttgtggaaaggacgaaacaccggGACAAGCGGGAGCGGAAGCGGTTTAAGAGCTATGCTGGAAACAGCATAGCACTCGTTCCTTTCGA	107
RBP_lib_1774	ACCGGCCAACATACCtatcttgtggaaaggacgaaacaccggGCAGACGGACACGTCGGATGGTTTAAGAGCTATGCTGGAAACAGCATAGCACTCGTTCCTTTCGA	107
RBP_lib_1775	ACCGGCCAACATACCtatcttgtggaaaggacgaaacaccggCCGGCTACCGCTGCGGCTGTGTTTAAGAGCTATGCTGGAAACAGCATAGCACTCGTTCCTTTCGA	107
RBP_lib_1776	ACCGGCCAACATACCtatcttgtggaaaggacgaaacaccggCCGTGACCCATCATATCCGCGTTTAAGAGCTATGCTGGAAACAGCATAGCACTCGTTCCTTTCGA	107
RBP_lib_1777	ACCGGCCAACATACCtatcttgtggaaaggacgaaacaccggGTTGAGCCTGCGGATATGATGTTTAAGAGCTATGCTGGAAACAGCATAGCACTCGTTCCTTTCGA	107
RBP_lib_1778	ACCGGCCAACATACCtatcttgtggaaaggacgaaacaccggACCGCTGCGGCTGTTGGAACGTTTAAGAGCTATGCTGGAAACAGCATAGCACTCGTTCCTTTCGA	107
RBP_lib_1779	ACCGGCCAACATACCtatcttgtggaaaggacgaaacaccggATGAATGGACGCCTTCATTTGTTTAAGAGCTATGCTGGAAACAGCATAGCACTCGTTCCTTTCGA	107
RBP_lib_1780	ACCGGCCAACATACCtatcttgtggaaaggacgaaacaccggCTGTACTGGTATGCCTATTAGTTTAAGAGCTATGCTGGAAACAGCATAGCACTCGTTCCTTTCGA	107
RBP_lib_1781	ACCGGCCAACATACCtatcttgtggaaaggacgaaacaccggCGTCCATTCATGTATGGATAGTTTAAGAGCTATGCTGGAAACAGCATAGCACTCGTTCCTTTCGA	107
RBP_lib_1782	ACCGGCCAACATACCtatcttgtggaaaggacgaaacaccggTGAAGTCAGTGCCTCCCGGCGTTTAAGAGCTATGCTGGAAACAGCATAGCACTCGTTCCTTTCGA	107
RBP_lib_1783	ACCGGCCAACATACCtatcttgtggaaaggacgaaacaccggGTAGTAAGGATTCACGTCCGGTTTAAGAGCTATGCTGGAAACAGCATAGCACTCGTTCCTTTCGA	107
RBP_lib_1784	ACCGGCCAACATACCtatcttgtggaaaggacgaaacaccggTGCTAAAGTAGACTTCTTGAGTTTAAGAGCTATGCTGGAAACAGCATAGCACTCGTTCCTTTCGA	107
RBP_lib_1785	ACCGGCCAACATACCtatcttgtggaaaggacgaaacaccggCCCTTTGGGTTGCACTGTACGTTTAAGAGCTATGCTGGAAACAGCATAGCACTCGTTCCTTTCGA	107
RBP_lib_1786	ACCGGCCAACATACCtatcttgtggaaaggacgaaacaccggGATCCTGAACGGCCAGTGGTGTTTAAGAGCTATGCTGGAAACAGCATAGCACTCGTTCCTTTCGA	107
RBP_lib_1787	ACCGGCCAACATACCtatcttgtggaaaggacgaaacaccggGCAAGCAGGCTACGTCCGCGGTTTAAGAGCTATGCTGGAAACAGCATAGCACTCGTTCCTTTCGA	107
RBP_lib_1788	ACCGGCCAACATACCtatcttgtggaaaggacgaaacaccggCCTTTACTTCCCGCGCCGCGGTTTAAGAGCTATGCTGGAAACAGCATAGCACTCGTTCCTTTCGA	107
RBP_lib_1789	ACCGGCCAACATACCtatcttgtggaaaggacgaaacaccggGCAACAGATGATGGTAAATGGTTTAAGAGCTATGCTGGAAACAGCATAGCACTCGTTCCTTTCGA	107
RBP_lib_1790	ACCGGCCAACATACCtatcttgtggaaaggacgaaacaccggCTCGAGACTTCTTAGCCTGAGTTTAAGAGCTATGCTGGAAACAGCATAGCACTCGTTCCTTTCGA	107
RBP_lib_1791	ACCGGCCAACATACCtatcttgtggaaaggacgaaacaccggACCACCGTCTTTCCGGACCCGTTTAAGAGCTATGCTGGAAACAGCATAGCACTCGTTCCTTTCGA	107
RBP_lib_1792	ACCGGCCAACATACCtatcttgtggaaaggacgaaacaccggTCGAGACTTCTTAGCCTGAAGTTTAAGAGCTATGCTGGAAACAGCATAGCACTCGTTCCTTTCGA	107
RBP_lib_1793	ACCGGCCAACATACCtatcttgtggaaaggacgaaacaccggGACTCAGCCCGTCACCCTTCGTTTAAGAGCTATGCTGGAAACAGCATAGCACTCGTTCCTTTCGA	107
RBP_lib_1794	ACCGGCCAACATACCtatcttgtggaaaggacgaaacaccggATTGACAGGTGTCGGTCTTGGTTTAAGAGCTATGCTGGAAACAGCATAGCACTCGTTCCTTTCGA	107
RBP_lib_1795	ACCGGCCAACATACCtatcttgtggaaaggacgaaacaccggCGTAGCTGAGTGAGTGCGCCGTTTAAGAGCTATGCTGGAAACAGCATAGCACTCGTTCCTTTCGA	107
RBP_lib_1796	ACCGGCCAACATACCtatcttgtggaaaggacgaaacaccggCTTGACCGGTCGCCCGCTCAGTTTAAGAGCTATGCTGGAAACAGCATAGCACTCGTTCCTTTCGA	107
RBP_lib_1797	ACCGGCCAACATACCtatcttgtggaaaggacgaaacaccggGACCGGTCGCCCGCTCAGGGGTTTAAGAGCTATGCTGGAAACAGCATAGCACTCGTTCCTTTCGA	107
RBP_lib_1798	ACCGGCCAACATACCtatcttgtggaaaggacgaaacaccggGGCGACCGGTCAAGATCCGCGTTTAAGAGCTATGCTGGAAACAGCATAGCACTCGTTCCTTTCGA	107
RBP_lib_1799	ACCGGCCAACATACCtatcttgtggaaaggacgaaacaccggCGCACTCACTCAGCTACGCGGTTTAAGAGCTATGCTGGAAACAGCATAGCACTCGTTCCTTTCGA	107
RBP_lib_1800	ACCGGCCAACATACCtatcttgtggaaaggacgaaacaccggCGAATCCTGCGGATCTTGACGTTTAAGAGCTATGCTGGAAACAGCATAGCACTCGTTCCTTTCGA	107
RBP_lib_1801	ACCGGCCAACATACCtatcttgtggaaaggacgaaacaccggTCTTGACCGGTCGCCCGCTCGTTTAAGAGCTATGCTGGAAACAGCATAGCACTCGTTCCTTTCGA	107
RBP_lib_1802	ACCGGCCAACATACCtatcttgtggaaaggacgaaacaccggGTCGCCCGCTCAGGGTGGACGTTTAAGAGCTATGCTGGAAACAGCATAGCACTCGTTCCTTTCGA	107
RBP_lib_1803	ACCGGCCAACATACCtatcttgtggaaaggacgaaacaccggCAGCGGCGTGGCGTTCGCTCGTTTAAGAGCTATGCTGGAAACAGCATAGCACTCGTTCCTTTCGA	107
RBP_lib_1804	ACCGGCCAACATACCtatcttgtggaaaggacgaaacaccggCGGAGCGAACGCCACGCCGCGTTTAAGAGCTATGCTGGAAACAGCATAGCACTCGTTCCTTTCGA	107
RBP_lib_1805	ACCGGCCAACATACCtatcttgtggaaaggacgaaacaccggCTGTGCGCAGTTTACGAGTCGTTTAAGAGCTATGCTGGAAACAGCATAGCACTCGTTCCTTTCGA	107
RBP_lib_1806	ACCGGCCAACATACCtatcttgtggaaaggacgaaacaccggCTGACTCGTAAACTGCGCACGTTTAAGAGCTATGCTGGAAACAGCATAGCACTCGTTCCTTTCGA	107
RBP_lib_1807	ACCGGCCAACATACCtatcttgtggaaaggacgaaacaccggTATACCCCCTGGACTGACTCGTTTAAGAGCTATGCTGGAAACAGCATAGCACTCGTTCCTTTCGA	107
RBP_lib_1808	ACCGGCCAACATACCtatcttgtggaaaggacgaaacaccggTGAACCAATCTACAACAGCGGTTTAAGAGCTATGCTGGAAACAGCATAGCACTCGTTCCTTTCGA	107
RBP_lib_1809	ACCGGCCAACATACCtatcttgtggaaaggacgaaacaccggATGCCTACAGTTATACCCCCGTTTAAGAGCTATGCTGGAAACAGCATAGCACTCGTTCCTTTCGA	107
RBP_lib_1810	ACCGGCCAACATACCtatcttgtggaaaggacgaaacaccggTAAACTGCGCACAGGAGACCGTTTAAGAGCTATGCTGGAAACAGCATAGCACTCGTTCCTTTCGA	107
RBP_lib_1811	ACCGGCCAACATACCtatcttgtggaaaggacgaaacaccggTGACCAGCGTCCTCCATAATGTTTAAGAGCTATGCTGGAAACAGCATAGCACTCGTTCCTTTCGA	107
RBP_lib_1812	ACCGGCCAACATACCtatcttgtggaaaggacgaaacaccggCGTAACGCCCTAGCCCATTAGTTTAAGAGCTATGCTGGAAACAGCATAGCACTCGTTCCTTTCGA	107
RBP_lib_1813	ACCGGCCAACATACCtatcttgtggaaaggacgaaacaccggGCGGCTCGAAGTCCCGCGACGTTTAAGAGCTATGCTGGAAACAGCATAGCACTCGTTCCTTTCGA	107
RBP_lib_1814	ACCGGCCAACATACCtatcttgtggaaaggacgaaacaccggGCGTCCTCCATAATGGGCTAGTTTAAGAGCTATGCTGGAAACAGCATAGCACTCGTTCCTTTCGA	107
RBP_lib_1815	ACCGGCCAACATACCtatcttgtggaaaggacgaaacaccggAGGTGACCGACTTCGCCCGAGTTTAAGAGCTATGCTGGAAACAGCATAGCACTCGTTCCTTTCGA	107
RBP_lib_1816	ACCGGCCAACATACCtatcttgtggaaaggacgaaacaccggACGAGGGCGCATCCCGGCTGGTTTAAGAGCTATGCTGGAAACAGCATAGCACTCGTTCCTTTCGA	107
RBP_lib_1817	ACCGGCCAACATACCtatcttgtggaaaggacgaaacaccggTAGCCCATTATGGAGGACGCGTTTAAGAGCTATGCTGGAAACAGCATAGCACTCGTTCCTTTCGA	107
RBP_lib_1818	ACCGGCCAACATACCtatcttgtggaaaggacgaaacaccggTTCACGTATACTACGACTCCGTTTAAGAGCTATGCTGGAAACAGCATAGCACTCGTTCCTTTCGA	107
RBP_lib_1819	ACCGGCCAACATACCtatcttgtggaaaggacgaaacaccggGACAGTTTCGATCGGGCTCCGTTTAAGAGCTATGCTGGAAACAGCATAGCACTCGTTCCTTTCGA	107
RBP_lib_1820	ACCGGCCAACATACCtatcttgtggaaaggacgaaacaccggTTCGATCGGGCTCCAGGTGCGTTTAAGAGCTATGCTGGAAACAGCATAGCACTCGTTCCTTTCGA	107
RBP_lib_1821	ACCGGCCAACATACCtatcttgtggaaaggacgaaacaccggATCGGGCTCCAGGTGCTGGTGTTTAAGAGCTATGCTGGAAACAGCATAGCACTCGTTCCTTTCGA	107
RBP_lib_1822	ACCGGCCAACATACCtatcttgtggaaaggacgaaacaccggCGGCGGGTTCCCGAACGGAGGTTTAAGAGCTATGCTGGAAACAGCATAGCACTCGTTCCTTTCGA	107
RBP_lib_1823	ACCGGCCAACATACCtatcttgtggaaaggacgaaacaccggCGGGCTCCAGGTGCTGGTCGGTTTAAGAGCTATGCTGGAAACAGCATAGCACTCGTTCCTTTCGA	107
RBP_lib_1824	ACCGGCCAACATACCtatcttgtggaaaggacgaaacaccggTTCGGGAACCCGCCGCCCTCGTTTAAGAGCTATGCTGGAAACAGCATAGCACTCGTTCCTTTCGA	107
RBP_lib_1825	ACCGGCCAACATACCtatcttgtggaaaggacgaaacaccggGAGGGCGGCGGGTTCCCGAAGTTTAAGAGCTATGCTGGAAACAGCATAGCACTCGTTCCTTTCGA	107
RBP_lib_1826	ACCGGCCAACATACCtatcttgtggaaaggacgaaacaccggCGGAGCCGGGGCCTGTTCCTGTTTAAGAGCTATGCTGGAAACAGCATAGCACTCGTTCCTTTCGA	107
RBP_lib_1827	ACCGGCCAACATACCtatcttgtggaaaggacgaaacaccggAGAGGGTCATGCCGTGCTCGGTTTAAGAGCTATGCTGGAAACAGCATAGCACTCGTTCCTTTCGA	107
RBP_lib_1828	ACCGGCCAACATACCtatcttgtggaaaggacgaaacaccggGGGTCTGGCCGGAGTAGTCCGTTTAAGAGCTATGCTGGAAACAGCATAGCACTCGTTCCTTTCGA	107
RBP_lib_1829	ACCGGCCAACATACCtatcttgtggaaaggacgaaacaccggGCCGTGCTCGGGGGGAACAGGTTTAAGAGCTATGCTGGAAACAGCATAGCACTCGTTCCTTTCGA	107
RBP_lib_1830	ACCGGCCAACATACCtatcttgtggaaaggacgaaacaccggGAGGGTCATGCCGTGCTCGGGTTTAAGAGCTATGCTGGAAACAGCATAGCACTCGTTCCTTTCGA	107
RBP_lib_1831	ACCGGCCAACATACCtatcttgtggaaaggacgaaacaccggGGGATTCCATTCTGAGGCGGGTTTAAGAGCTATGCTGGAAACAGCATAGCACTCGTTCCTTTCGA	107
RBP_lib_1832	ACCGGCCAACATACCtatcttgtggaaaggacgaaacaccggGGTCTGGCCGGAGTAGTCCTGTTTAAGAGCTATGCTGGAAACAGCATAGCACTCGTTCCTTTCGA	107
RBP_lib_1833	ACCGGCCAACATACCtatcttgtggaaaggacgaaacaccggATGCCGTGCTCGGGGGGAACGTTTAAGAGCTATGCTGGAAACAGCATAGCACTCGTTCCTTTCGA	107
RBP_lib_1834	ACCGGCCAACATACCtatcttgtggaaaggacgaaacaccggGTAGAGGGTCATGCCGTGCTGTTTAAGAGCTATGCTGGAAACAGCATAGCACTCGTTCCTTTCGA	107
RBP_lib_1835	ACCGGCCAACATACCtatcttgtggaaaggacgaaacaccggGGTACAGGTACTCGCGGCGCGTTTAAGAGCTATGCTGGAAACAGCATAGCACTCGTTCCTTTCGA	107
RBP_lib_1836	ACCGGCCAACATACCtatcttgtggaaaggacgaaacaccggGGAGGCGCAGCGATCCGTTCGTTTAAGAGCTATGCTGGAAACAGCATAGCACTCGTTCCTTTCGA	107
RBP_lib_1837	ACCGGCCAACATACCtatcttgtggaaaggacgaaacaccggCTTTGCGGTACAGGTACTCGGTTTAAGAGCTATGCTGGAAACAGCATAGCACTCGTTCCTTTCGA	107
RBP_lib_1838	ACCGGCCAACATACCtatcttgtggaaaggacgaaacaccggCCTCCCGGGCTTTGCGGTACGTTTAAGAGCTATGCTGGAAACAGCATAGCACTCGTTCCTTTCGA	107
RBP_lib_1839	ACCGGCCAACATACCtatcttgtggaaaggacgaaacaccggGCGATCCGTTCAGGAGAAGAGTTTAAGAGCTATGCTGGAAACAGCATAGCACTCGTTCCTTTCGA	107
RBP_lib_1840	ACCGGCCAACATACCtatcttgtggaaaggacgaaacaccggTAGAGCCTCCCGGCGTAACTGTTTAAGAGCTATGCTGGAAACAGCATAGCACTCGTTCCTTTCGA	107
RBP_lib_1841	ACCGGCCAACATACCtatcttgtggaaaggacgaaacaccggAGCCTCCCGGCGTAACTCGGGTTTAAGAGCTATGCTGGAAACAGCATAGCACTCGTTCCTTTCGA	107
RBP_lib_1842	ACCGGCCAACATACCtatcttgtggaaaggacgaaacaccggCCTGTACCGCAAAGCCCGGGGTTTAAGAGCTATGCTGGAAACAGCATAGCACTCGTTCCTTTCGA	107
RBP_lib_1843	ACCGGCCAACATACCtatcttgtggaaaggacgaaacaccggGCTACGGCCGCTGTGTGGCGGTTTAAGAGCTATGCTGGAAACAGCATAGCACTCGTTCCTTTCGA	107
RBP_lib_1844	ACCGGCCAACATACCtatcttgtggaaaggacgaaacaccggTCGAGACTGGACCACGCCGTGTTTAAGAGCTATGCTGGAAACAGCATAGCACTCGTTCCTTTCGA	107
RBP_lib_1845	ACCGGCCAACATACCtatcttgtggaaaggacgaaacaccggGGCTACGGCCGCTGTGTGGCGTTTAAGAGCTATGCTGGAAACAGCATAGCACTCGTTCCTTTCGA	107
RBP_lib_1846	ACCGGCCAACATACCtatcttgtggaaaggacgaaacaccggGGGCTACGGCCGCTGTGTGGGTTTAAGAGCTATGCTGGAAACAGCATAGCACTCGTTCCTTTCGA	107
RBP_lib_1847	ACCGGCCAACATACCtatcttgtggaaaggacgaaacaccggGAGGGGCTACGGCCGCTGTGGTTTAAGAGCTATGCTGGAAACAGCATAGCACTCGTTCCTTTCGA	107
RBP_lib_1848	ACCGGCCAACATACCtatcttgtggaaaggacgaaacaccggGGCGCACGGGAGTAATGTCCGTTTAAGAGCTATGCTGGAAACAGCATAGCACTCGTTCCTTTCGA	107
RBP_lib_1849	ACCGGCCAACATACCtatcttgtggaaaggacgaaacaccggTGGAGACGTGGCGCTGTGTGGTTTAAGAGCTATGCTGGAAACAGCATAGCACTCGTTCCTTTCGA	107
RBP_lib_1850	ACCGGCCAACATACCtatcttgtggaaaggacgaaacaccggCTGTAGATCCTCCCACGGCGGTTTAAGAGCTATGCTGGAAACAGCATAGCACTCGTTCCTTTCGA	107
RBP_lib_1851	ACCGGCCAACATACCtatcttgtggaaaggacgaaacaccggAGCGATGAAGTCTTGATGCAGTTTAAGAGCTATGCTGGAAACAGCATAGCACTCGTTCCTTTCGA	107
RBP_lib_1852	ACCGGCCAACATACCtatcttgtggaaaggacgaaacaccggGTGATGCTCCACCAGCAAAAGTTTAAGAGCTATGCTGGAAACAGCATAGCACTCGTTCCTTTCGA	107
RBP_lib_1853	ACCGGCCAACATACCtatcttgtggaaaggacgaaacaccggGCCCGTCTGGGACCGCACTAGTTTAAGAGCTATGCTGGAAACAGCATAGCACTCGTTCCTTTCGA	107
RBP_lib_1854	ACCGGCCAACATACCtatcttgtggaaaggacgaaacaccggTGCCCTAGTGCGGTCCCAGAGTTTAAGAGCTATGCTGGAAACAGCATAGCACTCGTTCCTTTCGA	107
RBP_lib_1855	ACCGGCCAACATACCtatcttgtggaaaggacgaaacaccggGCAGAGTATCCCAGTGCTGCGTTTAAGAGCTATGCTGGAAACAGCATAGCACTCGTTCCTTTCGA	107
RBP_lib_1856	ACCGGCCAACATACCtatcttgtggaaaggacgaaacaccggTGGACAGTATAGGCAATGGAGTTTAAGAGCTATGCTGGAAACAGCATAGCACTCGTTCCTTTCGA	107
RBP_lib_1857	ACCGGCCAACATACCtatcttgtggaaaggacgaaacaccggCTGGACCACAGGGACGCAATGTTTAAGAGCTATGCTGGAAACAGCATAGCACTCGTTCCTTTCGA	107
RBP_lib_1858	ACCGGCCAACATACCtatcttgtggaaaggacgaaacaccggCTGTCCAAATACTTCTTTGGGTTTAAGAGCTATGCTGGAAACAGCATAGCACTCGTTCCTTTCGA	107
RBP_lib_1859	ACCGGCCAACATACCtatcttgtggaaaggacgaaacaccggGGTTACATTAGTATCGCCAAGTTTAAGAGCTATGCTGGAAACAGCATAGCACTCGTTCCTTTCGA	107
RBP_lib_1860	ACCGGCCAACATACCtatcttgtggaaaggacgaaacaccggCCGAGGGGGCGCACACCGACGTTTAAGAGCTATGCTGGAAACAGCATAGCACTCGTTCCTTTCGA	107
RBP_lib_1861	ACCGGCCAACATACCtatcttgtggaaaggacgaaacaccggATTAGCCAGCTGCTCTACGAGTTTAAGAGCTATGCTGGAAACAGCATAGCACTCGTTCCTTTCGA	107
RBP_lib_1862	ACCGGCCAACATACCtatcttgtggaaaggacgaaacaccggACTGCGGTCCAGTATGCCATGTTTAAGAGCTATGCTGGAAACAGCATAGCACTCGTTCCTTTCGA	107
RBP_lib_1863	ACCGGCCAACATACCtatcttgtggaaaggacgaaacaccggCGAGGGGGCGCACACCGACTGTTTAAGAGCTATGCTGGAAACAGCATAGCACTCGTTCCTTTCGA	107
RBP_lib_1864	ACCGGCCAACATACCtatcttgtggaaaggacgaaacaccggCGCTCTGACACGGTTGCCCCGTTTAAGAGCTATGCTGGAAACAGCATAGCACTCGTTCCTTTCGA	107
RBP_lib_1865	ACCGGCCAACATACCtatcttgtggaaaggacgaaacaccggTGTAACCGTCGTAGAGCAGCGTTTAAGAGCTATGCTGGAAACAGCATAGCACTCGTTCCTTTCGA	107
RBP_lib_1866	ACCGGCCAACATACCtatcttgtggaaaggacgaaacaccggCCGGTCCTTCAAACCCACTTGTTTAAGAGCTATGCTGGAAACAGCATAGCACTCGTTCCTTTCGA	107
RBP_lib_1867	ACCGGCCAACATACCtatcttgtggaaaggacgaaacaccggCGGCCGCGGAAACACACTCGGTTTAAGAGCTATGCTGGAAACAGCATAGCACTCGTTCCTTTCGA	107
RBP_lib_1868	ACCGGCCAACATACCtatcttgtggaaaggacgaaacaccggGACGGCCGCGGAAACACACTGTTTAAGAGCTATGCTGGAAACAGCATAGCACTCGTTCCTTTCGA	107
RBP_lib_1869	ACCGGCCAACATACCtatcttgtggaaaggacgaaacaccggACGGCCGCGGAAACACACTCGTTTAAGAGCTATGCTGGAAACAGCATAGCACTCGTTCCTTTCGA	107
RBP_lib_1870	ACCGGCCAACATACCtatcttgtggaaaggacgaaacaccggGCTCCCCGAGTGTGTTTCCGGTTTAAGAGCTATGCTGGAAACAGCATAGCACTCGTTCCTTTCGA	107
RBP_lib_1871	ACCGGCCAACATACCtatcttgtggaaaggacgaaacaccggGTACTTTCTGAGCGATGCGTGTTTAAGAGCTATGCTGGAAACAGCATAGCACTCGTTCCTTTCGA	107
RBP_lib_1872	ACCGGCCAACATACCtatcttgtggaaaggacgaaacaccggAAACACACTCGGGGAGCACGGTTTAAGAGCTATGCTGGAAACAGCATAGCACTCGTTCCTTTCGA	107
RBP_lib_1873	ACCGGCCAACATACCtatcttgtggaaaggacgaaacaccggTGAGCGATGCGTCGGTGGTGGTTTAAGAGCTATGCTGGAAACAGCATAGCACTCGTTCCTTTCGA	107
RBP_lib_1874	ACCGGCCAACATACCtatcttgtggaaaggacgaaacaccggCGATGCGTCGGTGGTGTGGTGTTTAAGAGCTATGCTGGAAACAGCATAGCACTCGTTCCTTTCGA	107
RBP_lib_1875	ACCGGCCAACATACCtatcttgtggaaaggacgaaacaccggGTTGAAGGCCGATTAGGTAAGTTTAAGAGCTATGCTGGAAACAGCATAGCACTCGTTCCTTTCGA	107
RBP_lib_1876	ACCGGCCAACATACCtatcttgtggaaaggacgaaacaccggCGGGAGCTGCAAGGTCCTTGGTTTAAGAGCTATGCTGGAAACAGCATAGCACTCGTTCCTTTCGA	107
RBP_lib_1877	ACCGGCCAACATACCtatcttgtggaaaggacgaaacaccggAACCTCTCCTCCTATGTCAGGTTTAAGAGCTATGCTGGAAACAGCATAGCACTCGTTCCTTTCGA	107
RBP_lib_1878	ACCGGCCAACATACCtatcttgtggaaaggacgaaacaccggGCCCAAAAGCCTTCTGTGGCGTTTAAGAGCTATGCTGGAAACAGCATAGCACTCGTTCCTTTCGA	107
RBP_lib_1879	ACCGGCCAACATACCtatcttgtggaaaggacgaaacaccggCTTGCAGCTCCCGCCACAGAGTTTAAGAGCTATGCTGGAAACAGCATAGCACTCGTTCCTTTCGA	107
RBP_lib_1880	ACCGGCCAACATACCtatcttgtggaaaggacgaaacaccggCTGCAAGGTCCTTGTGGACCGTTTAAGAGCTATGCTGGAAACAGCATAGCACTCGTTCCTTTCGA	107
RBP_lib_1881	ACCGGCCAACATACCtatcttgtggaaaggacgaaacaccggCTCCTATGTCAGTGGCTGCCGTTTAAGAGCTATGCTGGAAACAGCATAGCACTCGTTCCTTTCGA	107
RBP_lib_1882	ACCGGCCAACATACCtatcttgtggaaaggacgaaacaccggGACATAGGAGGAGAGGTTGAGTTTAAGAGCTATGCTGGAAACAGCATAGCACTCGTTCCTTTCGA	107
RBP_lib_1883	ACCGGCCAACATACCtatcttgtggaaaggacgaaacaccggCACCAATTCGGGACACAAAAGTTTAAGAGCTATGCTGGAAACAGCATAGCACTCGTTCCTTTCGA	107
RBP_lib_1884	ACCGGCCAACATACCtatcttgtggaaaggacgaaacaccggCTGTTAGTGTCACACCAATTGTTTAAGAGCTATGCTGGAAACAGCATAGCACTCGTTCCTTTCGA	107
RBP_lib_1885	ACCGGCCAACATACCtatcttgtggaaaggacgaaacaccggTGTTAGTGTCACACCAATTCGTTTAAGAGCTATGCTGGAAACAGCATAGCACTCGTTCCTTTCGA	107
RBP_lib_1886	ACCGGCCAACATACCtatcttgtggaaaggacgaaacaccggGACTTGCTCACGACCAGACAGTTTAAGAGCTATGCTGGAAACAGCATAGCACTCGTTCCTTTCGA	107
RBP_lib_1887	ACCGGCCAACATACCtatcttgtggaaaggacgaaacaccggGCAAATTTACATTCCGTGTCGTTTAAGAGCTATGCTGGAAACAGCATAGCACTCGTTCCTTTCGA	107
RBP_lib_1888	ACCGGCCAACATACCtatcttgtggaaaggacgaaacaccggGGCACCGGGCATCATGGCATGTTTAAGAGCTATGCTGGAAACAGCATAGCACTCGTTCCTTTCGA	107
RBP_lib_1889	ACCGGCCAACATACCtatcttgtggaaaggacgaaacaccggAAGTATGTAGAGAGTTTCAAGTTTAAGAGCTATGCTGGAAACAGCATAGCACTCGTTCCTTTCGA	107
RBP_lib_1890	ACCGGCCAACATACCtatcttgtggaaaggacgaaacaccggCAACGGGGCACCGGGCATCAGTTTAAGAGCTATGCTGGAAACAGCATAGCACTCGTTCCTTTCGA	107
RBP_lib_1891	ACCGGCCAACATACCtatcttgtggaaaggacgaaacaccggCTCGCAAGCGGAATCGAGAAGTTTAAGAGCTATGCTGGAAACAGCATAGCACTCGTTCCTTTCGA	107
RBP_lib_1892	ACCGGCCAACATACCtatcttgtggaaaggacgaaacaccggCGCAAGCGGAATCGAGAAAGGTTTAAGAGCTATGCTGGAAACAGCATAGCACTCGTTCCTTTCGA	107
RBP_lib_1893	ACCGGCCAACATACCtatcttgtggaaaggacgaaacaccggTCGCAAGCGGAATCGAGAAAGTTTAAGAGCTATGCTGGAAACAGCATAGCACTCGTTCCTTTCGA	107
RBP_lib_1894	ACCGGCCAACATACCtatcttgtggaaaggacgaaacaccggCTTTCTCGATTCCGCTTGCGGTTTAAGAGCTATGCTGGAAACAGCATAGCACTCGTTCCTTTCGA	107
RBP_lib_1895	ACCGGCCAACATACCtatcttgtggaaaggacgaaacaccggGGATTGGGTTCTGATTCCGAGTTTAAGAGCTATGCTGGAAACAGCATAGCACTCGTTCCTTTCGA	107
RBP_lib_1896	ACCGGCCAACATACCtatcttgtggaaaggacgaaacaccggGAATACTGCTATGTTAGGATGTTTAAGAGCTATGCTGGAAACAGCATAGCACTCGTTCCTTTCGA	107
RBP_lib_1897	ACCGGCCAACATACCtatcttgtggaaaggacgaaacaccggTTCTTCGGCTTGGCAGTCGAGTTTAAGAGCTATGCTGGAAACAGCATAGCACTCGTTCCTTTCGA	107
RBP_lib_1898	ACCGGCCAACATACCtatcttgtggaaaggacgaaacaccggCAGTCGAGATCCTGATATAAGTTTAAGAGCTATGCTGGAAACAGCATAGCACTCGTTCCTTTCGA	107
RBP_lib_1899	ACCGGCCAACATACCtatcttgtggaaaggacgaaacaccggTCCCACGGCTCTTGACCTCTGTTTAAGAGCTATGCTGGAAACAGCATAGCACTCGTTCCTTTCGA	107
RBP_lib_1900	ACCGGCCAACATACCtatcttgtggaaaggacgaaacaccggATCCCACGGCTCTTGACCTCGTTTAAGAGCTATGCTGGAAACAGCATAGCACTCGTTCCTTTCGA	107
RBP_lib_1901	ACCGGCCAACATACCtatcttgtggaaaggacgaaacaccggACCCCAGAGGTCAAGAGCCGGTTTAAGAGCTATGCTGGAAACAGCATAGCACTCGTTCCTTTCGA	107
RBP_lib_1902	ACCGGCCAACATACCtatcttgtggaaaggacgaaacaccggCTTCAGCAAACTTCATCCCAGTTTAAGAGCTATGCTGGAAACAGCATAGCACTCGTTCCTTTCGA	107
RBP_lib_1903	ACCGGCCAACATACCtatcttgtggaaaggacgaaacaccggTGGCATTACCCAGGCCCTCAGTTTAAGAGCTATGCTGGAAACAGCATAGCACTCGTTCCTTTCGA	107
RBP_lib_1904	ACCGGCCAACATACCtatcttgtggaaaggacgaaacaccggCCCCAGAGGTCAAGAGCCGTGTTTAAGAGCTATGCTGGAAACAGCATAGCACTCGTTCCTTTCGA	107
RBP_lib_1905	ACCGGCCAACATACCtatcttgtggaaaggacgaaacaccggCGAGTCCACTACCAAGCTGGGTTTAAGAGCTATGCTGGAAACAGCATAGCACTCGTTCCTTTCGA	107
RBP_lib_1906	ACCGGCCAACATACCtatcttgtggaaaggacgaaacaccggCCAGCTTGGTAGTGGACTCGGTTTAAGAGCTATGCTGGAAACAGCATAGCACTCGTTCCTTTCGA	107
RBP_lib_1907	ACCGGCCAACATACCtatcttgtggaaaggacgaaacaccggAGCTCGCAGCGGCGGAACTCGTTTAAGAGCTATGCTGGAAACAGCATAGCACTCGTTCCTTTCGA	107
RBP_lib_1908	ACCGGCCAACATACCtatcttgtggaaaggacgaaacaccggCGGTGTGGAGCTCGCAGCGGGTTTAAGAGCTATGCTGGAAACAGCATAGCACTCGTTCCTTTCGA	107
RBP_lib_1909	ACCGGCCAACATACCtatcttgtggaaaggacgaaacaccggGCTCGCAGCGGCGGAACTCTGTTTAAGAGCTATGCTGGAAACAGCATAGCACTCGTTCCTTTCGA	107
RBP_lib_1910	ACCGGCCAACATACCtatcttgtggaaaggacgaaacaccggCGAGCTCCACACCGTGCGTGGTTTAAGAGCTATGCTGGAAACAGCATAGCACTCGTTCCTTTCGA	107
RBP_lib_1911	ACCGGCCAACATACCtatcttgtggaaaggacgaaacaccggTGTCTGAGGTGGCGCCGGCTGTTTAAGAGCTATGCTGGAAACAGCATAGCACTCGTTCCTTTCGA	107
RBP_lib_1912	ACCGGCCAACATACCtatcttgtggaaaggacgaaacaccggGCACGGTGTGGAGCTCGCAGGTTTAAGAGCTATGCTGGAAACAGCATAGCACTCGTTCCTTTCGA	107
RBP_lib_1913	ACCGGCCAACATACCtatcttgtggaaaggacgaaacaccggCGTTCTGCCAACCAATGTGGGTTTAAGAGCTATGCTGGAAACAGCATAGCACTCGTTCCTTTCGA	107
RBP_lib_1914	ACCGGCCAACATACCtatcttgtggaaaggacgaaacaccggTTACGATCTGGACCGACCCTGTTTAAGAGCTATGCTGGAAACAGCATAGCACTCGTTCCTTTCGA	107
RBP_lib_1915	ACCGGCCAACATACCtatcttgtggaaaggacgaaacaccggCGACCAAACTGCTCGAAGATGTTTAAGAGCTATGCTGGAAACAGCATAGCACTCGTTCCTTTCGA	107
RBP_lib_1916	ACCGGCCAACATACCtatcttgtggaaaggacgaaacaccggCCGACCAAACTGCTCGAAGAGTTTAAGAGCTATGCTGGAAACAGCATAGCACTCGTTCCTTTCGA	107
RBP_lib_1917	ACCGGCCAACATACCtatcttgtggaaaggacgaaacaccggAATCGCGAGCACAGTACGTCGTTTAAGAGCTATGCTGGAAACAGCATAGCACTCGTTCCTTTCGA	107
RBP_lib_1918	ACCGGCCAACATACCtatcttgtggaaaggacgaaacaccggCCATCTTCGAGCAGTTTGGTGTTTAAGAGCTATGCTGGAAACAGCATAGCACTCGTTCCTTTCGA	107
RBP_lib_1919	ACCGGCCAACATACCtatcttgtggaaaggacgaaacaccggACTGCTCGAAGATGGGCTTCGTTTAAGAGCTATGCTGGAAACAGCATAGCACTCGTTCCTTTCGA	107
RBP_lib_1920	ACCGGCCAACATACCtatcttgtggaaaggacgaaacaccggGGGGCAGATCCCGAGGCATCGTTTAAGAGCTATGCTGGAAACAGCATAGCACTCGTTCCTTTCGA	107
RBP_lib_1921	ACCGGCCAACATACCtatcttgtggaaaggacgaaacaccggCGCTGTCGGCTGGCTTGACCGTTTAAGAGCTATGCTGGAAACAGCATAGCACTCGTTCCTTTCGA	107
RBP_lib_1922	ACCGGCCAACATACCtatcttgtggaaaggacgaaacaccggTCGGCTGGCTTGACCTGGATGTTTAAGAGCTATGCTGGAAACAGCATAGCACTCGTTCCTTTCGA	107
RBP_lib_1923	ACCGGCCAACATACCtatcttgtggaaaggacgaaacaccggGTCACTGACTCGGAAATTCTGTTTAAGAGCTATGCTGGAAACAGCATAGCACTCGTTCCTTTCGA	107
RBP_lib_1924	ACCGGCCAACATACCtatcttgtggaaaggacgaaacaccggGTGGAAATGTAAACTTTGCTGTTTAAGAGCTATGCTGGAAACAGCATAGCACTCGTTCCTTTCGA	107
RBP_lib_1925	ACCGGCCAACATACCtatcttgtggaaaggacgaaacaccggGAATTTCCGAGTCAGTGACGGTTTAAGAGCTATGCTGGAAACAGCATAGCACTCGTTCCTTTCGA	107
RBP_lib_1926	ACCGGCCAACATACCtatcttgtggaaaggacgaaacaccggGCTTATTTAGTGCCAATGATGTTTAAGAGCTATGCTGGAAACAGCATAGCACTCGTTCCTTTCGA	107
RBP_lib_1927	ACCGGCCAACATACCtatcttgtggaaaggacgaaacaccggTCCGAGTCAGTGACGGGGACGTTTAAGAGCTATGCTGGAAACAGCATAGCACTCGTTCCTTTCGA	107
RBP_lib_1928	ACCGGCCAACATACCtatcttgtggaaaggacgaaacaccggTCCCCCAGCTTTCATCATCTGTTTAAGAGCTATGCTGGAAACAGCATAGCACTCGTTCCTTTCGA	107
RBP_lib_1929	ACCGGCCAACATACCtatcttgtggaaaggacgaaacaccggCATTGGCACTAAATAAGCCCGTTTAAGAGCTATGCTGGAAACAGCATAGCACTCGTTCCTTTCGA	107
RBP_lib_1930	ACCGGCCAACATACCtatcttgtggaaaggacgaaacaccggGCCAAGATGATGAAAGCTGGGTTTAAGAGCTATGCTGGAAACAGCATAGCACTCGTTCCTTTCGA	107
RBP_lib_1931	ACCGGCCAACATACCtatcttgtggaaaggacgaaacaccggGGATCTTGTACTCCTCCTCGGTTTAAGAGCTATGCTGGAAACAGCATAGCACTCGTTCCTTTCGA	107
RBP_lib_1932	ACCGGCCAACATACCtatcttgtggaaaggacgaaacaccggTTGCGAGAAGTGGAACCATGGTTTAAGAGCTATGCTGGAAACAGCATAGCACTCGTTCCTTTCGA	107
RBP_lib_1933	ACCGGCCAACATACCtatcttgtggaaaggacgaaacaccggGCTCTTCATTGAAGACCGCGGTTTAAGAGCTATGCTGGAAACAGCATAGCACTCGTTCCTTTCGA	107
RBP_lib_1934	ACCGGCCAACATACCtatcttgtggaaaggacgaaacaccggCTTCATTGAAGACCGCGAGGGTTTAAGAGCTATGCTGGAAACAGCATAGCACTCGTTCCTTTCGA	107
RBP_lib_1935	ACCGGCCAACATACCtatcttgtggaaaggacgaaacaccggCCTCTGCTCCCGGGCATTTGGTTTAAGAGCTATGCTGGAAACAGCATAGCACTCGTTCCTTTCGA	107
RBP_lib_1936	ACCGGCCAACATACCtatcttgtggaaaggacgaaacaccggAGAGCAGCATTTCGGCCACAGTTTAAGAGCTATGCTGGAAACAGCATAGCACTCGTTCCTTTCGA	107
RBP_lib_1937	ACCGGCCAACATACCtatcttgtggaaaggacgaaacaccggCCACAAATGCCCGGGAGCAGGTTTAAGAGCTATGCTGGAAACAGCATAGCACTCGTTCCTTTCGA	107
RBP_lib_1938	ACCGGCCAACATACCtatcttgtggaaaggacgaaacaccggGAATCAAGGTCACTTTCATTGTTTAAGAGCTATGCTGGAAACAGCATAGCACTCGTTCCTTTCGA	107
RBP_lib_1939	ACCGGCCAACATACCtatcttgtggaaaggacgaaacaccggAAGGTGAAGCGCATGTCGCCGTTTAAGAGCTATGCTGGAAACAGCATAGCACTCGTTCCTTTCGA	107
RBP_lib_1940	ACCGGCCAACATACCtatcttgtggaaaggacgaaacaccggGCAGAGGAGTCACCGGATCGGTTTAAGAGCTATGCTGGAAACAGCATAGCACTCGTTCCTTTCGA	107
RBP_lib_1941	ACCGGCCAACATACCtatcttgtggaaaggacgaaacaccggTAAGTCGGTGCTGTTGTACAGTTTAAGAGCTATGCTGGAAACAGCATAGCACTCGTTCCTTTCGA	107
RBP_lib_1942	ACCGGCCAACATACCtatcttgtggaaaggacgaaacaccggCAGAGGCGCTACAGAGTGCAGTTTAAGAGCTATGCTGGAAACAGCATAGCACTCGTTCCTTTCGA	107
RBP_lib_1943	ACCGGCCAACATACCtatcttgtggaaaggacgaaacaccggCCCAAAATTGTTTCCGACATGTTTAAGAGCTATGCTGGAAACAGCATAGCACTCGTTCCTTTCGA	107
RBP_lib_1944	ACCGGCCAACATACCtatcttgtggaaaggacgaaacaccggCGGCATCATAGACTTCCATCGTTTAAGAGCTATGCTGGAAACAGCATAGCACTCGTTCCTTTCGA	107
RBP_lib_1945	ACCGGCCAACATACCtatcttgtggaaaggacgaaacaccggACAGATAGGCTCTCCTATGTGTTTAAGAGCTATGCTGGAAACAGCATAGCACTCGTTCCTTTCGA	107
RBP_lib_1946	ACCGGCCAACATACCtatcttgtggaaaggacgaaacaccggGATCCGGTGACTCCTCTGCCGTTTAAGAGCTATGCTGGAAACAGCATAGCACTCGTTCCTTTCGA	107
RBP_lib_1947	ACCGGCCAACATACCtatcttgtggaaaggacgaaacaccggGCGAATCAAACTTCCCCATTGTTTAAGAGCTATGCTGGAAACAGCATAGCACTCGTTCCTTTCGA	107
RBP_lib_1948	ACCGGCCAACATACCtatcttgtggaaaggacgaaacaccggTAAGATGCGAGTGTGCTGGTGTTTAAGAGCTATGCTGGAAACAGCATAGCACTCGTTCCTTTCGA	107
RBP_lib_1949	ACCGGCCAACATACCtatcttgtggaaaggacgaaacaccggGATGACGCCCGAGTCAATGCGTTTAAGAGCTATGCTGGAAACAGCATAGCACTCGTTCCTTTCGA	107
RBP_lib_1950	ACCGGCCAACATACCtatcttgtggaaaggacgaaacaccggACGCCCGAGTCAATGCTGGTGTTTAAGAGCTATGCTGGAAACAGCATAGCACTCGTTCCTTTCGA	107
RBP_lib_1951	ACCGGCCAACATACCtatcttgtggaaaggacgaaacaccggCGCCCGAGTCAATGCTGGTGGTTTAAGAGCTATGCTGGAAACAGCATAGCACTCGTTCCTTTCGA	107
RBP_lib_1952	ACCGGCCAACATACCtatcttgtggaaaggacgaaacaccggGCATTGACTCGGGCGTCATCGTTTAAGAGCTATGCTGGAAACAGCATAGCACTCGTTCCTTTCGA	107
RBP_lib_1953	ACCGGCCAACATACCtatcttgtggaaaggacgaaacaccggAGCATTGACTCGGGCGTCATGTTTAAGAGCTATGCTGGAAACAGCATAGCACTCGTTCCTTTCGA	107
RBP_lib_1954	ACCGGCCAACATACCtatcttgtggaaaggacgaaacaccggGACGCCCGAGTCAATGCTGGGTTTAAGAGCTATGCTGGAAACAGCATAGCACTCGTTCCTTTCGA	107
RBP_lib_1955	ACCGGCCAACATACCtatcttgtggaaaggacgaaacaccggGAGTCCGACTCTGAAAGCGGGTTTAAGAGCTATGCTGGAAACAGCATAGCACTCGTTCCTTTCGA	107
RBP_lib_1956	ACCGGCCAACATACCtatcttgtggaaaggacgaaacaccggAGTCCGACTCTGAAAGCGGAGTTTAAGAGCTATGCTGGAAACAGCATAGCACTCGTTCCTTTCGA	107
RBP_lib_1957	ACCGGCCAACATACCtatcttgtggaaaggacgaaacaccggTCCGCTTTCAGAGTCGGACTGTTTAAGAGCTATGCTGGAAACAGCATAGCACTCGTTCCTTTCGA	107
RBP_lib_1958	ACCGGCCAACATACCtatcttgtggaaaggacgaaacaccggGTCCGACTCTGAAAGCGGAGGTTTAAGAGCTATGCTGGAAACAGCATAGCACTCGTTCCTTTCGA	107
RBP_lib_1959	ACCGGCCAACATACCtatcttgtggaaaggacgaaacaccggTCCGAGTCCGACTCTGAAAGGTTTAAGAGCTATGCTGGAAACAGCATAGCACTCGTTCCTTTCGA	107
RBP_lib_1960	ACCGGCCAACATACCtatcttgtggaaaggacgaaacaccggTCCCGCGGACTCCTGAAGCCGTTTAAGAGCTATGCTGGAAACAGCATAGCACTCGTTCCTTTCGA	107
RBP_lib_1961	ACCGGCCAACATACCtatcttgtggaaaggacgaaacaccggCACCCCTCCGCTTTCAGAGTGTTTAAGAGCTATGCTGGAAACAGCATAGCACTCGTTCCTTTCGA	107
RBP_lib_1962	ACCGGCCAACATACCtatcttgtggaaaggacgaaacaccggCGACATTGAGACCTGGCTTCGTTTAAGAGCTATGCTGGAAACAGCATAGCACTCGTTCCTTTCGA	107
RBP_lib_1963	ACCGGCCAACATACCtatcttgtggaaaggacgaaacaccggAGGACGACATGTGAGTTCGAGTTTAAGAGCTATGCTGGAAACAGCATAGCACTCGTTCCTTTCGA	107
RBP_lib_1964	ACCGGCCAACATACCtatcttgtggaaaggacgaaacaccggCCAACATCTACTATCTCAGAGTTTAAGAGCTATGCTGGAAACAGCATAGCACTCGTTCCTTTCGA	107
RBP_lib_1965	ACCGGCCAACATACCtatcttgtggaaaggacgaaacaccggCCTTCTGAGATAGTAGATGTGTTTAAGAGCTATGCTGGAAACAGCATAGCACTCGTTCCTTTCGA	107
RBP_lib_1966	ACCGGCCAACATACCtatcttgtggaaaggacgaaacaccggGTTGCTATGGTGACAGACTAGTTTAAGAGCTATGCTGGAAACAGCATAGCACTCGTTCCTTTCGA	107
RBP_lib_1967	ACCGGCCAACATACCtatcttgtggaaaggacgaaacaccggTGACAACGTTGTTGGGATCGGTTTAAGAGCTATGCTGGAAACAGCATAGCACTCGTTCCTTTCGA	107
RBP_lib_1968	ACCGGCCAACATACCtatcttgtggaaaggacgaaacaccggGGCAAGTTCTCCATGGTCTCGTTTAAGAGCTATGCTGGAAACAGCATAGCACTCGTTCCTTTCGA	107
RBP_lib_1969	ACCGGCCAACATACCtatcttgtggaaaggacgaaacaccggGAGGCGCAGACGGTCCTTCCGTTTAAGAGCTATGCTGGAAACAGCATAGCACTCGTTCCTTTCGA	107
RBP_lib_1970	ACCGGCCAACATACCtatcttgtggaaaggacgaaacaccggTCACATGTCGTCCTGTCGAGGTTTAAGAGCTATGCTGGAAACAGCATAGCACTCGTTCCTTTCGA	107
RBP_lib_1971	ACCGGCCAACATACCtatcttgtggaaaggacgaaacaccggGCAGCAACGGCGCTATCATGGTTTAAGAGCTATGCTGGAAACAGCATAGCACTCGTTCCTTTCGA	107
RBP_lib_1972	ACCGGCCAACATACCtatcttgtggaaaggacgaaacaccggACGGCGCTATCATGAGGAGAGTTTAAGAGCTATGCTGGAAACAGCATAGCACTCGTTCCTTTCGA	107
RBP_lib_1973	ACCGGCCAACATACCtatcttgtggaaaggacgaaacaccggTCAATTCCGATCACCGCACTGTTTAAGAGCTATGCTGGAAACAGCATAGCACTCGTTCCTTTCGA	107
RBP_lib_1974	ACCGGCCAACATACCtatcttgtggaaaggacgaaacaccggCAATTCCGATCACCGCACTCGTTTAAGAGCTATGCTGGAAACAGCATAGCACTCGTTCCTTTCGA	107
RBP_lib_1975	ACCGGCCAACATACCtatcttgtggaaaggacgaaacaccggTGCGGTGATCGGAATTGATCGTTTAAGAGCTATGCTGGAAACAGCATAGCACTCGTTCCTTTCGA	107
RBP_lib_1976	ACCGGCCAACATACCtatcttgtggaaaggacgaaacaccggCTCCATGTACCTATCTTGCAGTTTAAGAGCTATGCTGGAAACAGCATAGCACTCGTTCCTTTCGA	107
RBP_lib_1977	ACCGGCCAACATACCtatcttgtggaaaggacgaaacaccggGGCCATGCAAGATAGGTACAGTTTAAGAGCTATGCTGGAAACAGCATAGCACTCGTTCCTTTCGA	107
RBP_lib_1978	ACCGGCCAACATACCtatcttgtggaaaggacgaaacaccggGAGGAGCTCAATGCTATCTCGTTTAAGAGCTATGCTGGAAACAGCATAGCACTCGTTCCTTTCGA	107
RBP_lib_1979	ACCGGCCAACATACCtatcttgtggaaaggacgaaacaccggGGAACAATGGCGGCGGCACAGTTTAAGAGCTATGCTGGAAACAGCATAGCACTCGTTCCTTTCGA	107
RBP_lib_1980	ACCGGCCAACATACCtatcttgtggaaaggacgaaacaccggGAACAATGGCGGCGGCACATGTTTAAGAGCTATGCTGGAAACAGCATAGCACTCGTTCCTTTCGA	107
RBP_lib_1981	ACCGGCCAACATACCtatcttgtggaaaggacgaaacaccggCCCGCGGCCTCTCCCATTGGGTTTAAGAGCTATGCTGGAAACAGCATAGCACTCGTTCCTTTCGA	107
RBP_lib_1982	ACCGGCCAACATACCtatcttgtggaaaggacgaaacaccggCGGCGGCACATGGGAGAGCCGTTTAAGAGCTATGCTGGAAACAGCATAGCACTCGTTCCTTTCGA	107
RBP_lib_1983	ACCGGCCAACATACCtatcttgtggaaaggacgaaacaccggCCGCGGGAGGCTAAAGTAGCGTTTAAGAGCTATGCTGGAAACAGCATAGCACTCGTTCCTTTCGA	107
RBP_lib_1984	ACCGGCCAACATACCtatcttgtggaaaggacgaaacaccggCCCGCTACTTTAGCCTCCCGGTTTAAGAGCTATGCTGGAAACAGCATAGCACTCGTTCCTTTCGA	107
RBP_lib_1985	ACCGGCCAACATACCtatcttgtggaaaggacgaaacaccggGGCGGCACATGGGAGAGCCGGTTTAAGAGCTATGCTGGAAACAGCATAGCACTCGTTCCTTTCGA	107
RBP_lib_1986	ACCGGCCAACATACCtatcttgtggaaaggacgaaacaccggGCCGCGGGAGGCTAAAGTAGGTTTAAGAGCTATGCTGGAAACAGCATAGCACTCGTTCCTTTCGA	107
RBP_lib_1987	ACCGGCCAACATACCtatcttgtggaaaggacgaaacaccggGCGACGCCGCTACAACGTGAGTTTAAGAGCTATGCTGGAAACAGCATAGCACTCGTTCCTTTCGA	107
RBP_lib_1988	ACCGGCCAACATACCtatcttgtggaaaggacgaaacaccggCGACGCCGCTACAACGTGAAGTTTAAGAGCTATGCTGGAAACAGCATAGCACTCGTTCCTTTCGA	107
RBP_lib_1989	ACCGGCCAACATACCtatcttgtggaaaggacgaaacaccggGACGCCGCTACAACGTGAAGGTTTAAGAGCTATGCTGGAAACAGCATAGCACTCGTTCCTTTCGA	107
RBP_lib_1990	ACCGGCCAACATACCtatcttgtggaaaggacgaaacaccggTGAAGCGCCTCCCGTACGGCGTTTAAGAGCTATGCTGGAAACAGCATAGCACTCGTTCCTTTCGA	107
RBP_lib_1991	ACCGGCCAACATACCtatcttgtggaaaggacgaaacaccggGCCGCTACAACGTGAAGGGGGTTTAAGAGCTATGCTGGAAACAGCATAGCACTCGTTCCTTTCGA	107
RBP_lib_1992	ACCGGCCAACATACCtatcttgtggaaaggacgaaacaccggGCCGTACGGGAGGCGCTTCAGTTTAAGAGCTATGCTGGAAACAGCATAGCACTCGTTCCTTTCGA	107
RBP_lib_1993	ACCGGCCAACATACCtatcttgtggaaaggacgaaacaccggAGCCGTACGGGAGGCGCTTCGTTTAAGAGCTATGCTGGAAACAGCATAGCACTCGTTCCTTTCGA	107
RBP_lib_1994	ACCGGCCAACATACCtatcttgtggaaaggacgaaacaccggGCCGCCCCTTCACGTTGTAGGTTTAAGAGCTATGCTGGAAACAGCATAGCACTCGTTCCTTTCGA	107
RBP_lib_1995	ACCGGCCAACATACCtatcttgtggaaaggacgaaacaccggTAGGCGTTCCCCTTAAGGTTGTTTAAGAGCTATGCTGGAAACAGCATAGCACTCGTTCCTTTCGA	107
RBP_lib_1996	ACCGGCCAACATACCtatcttgtggaaaggacgaaacaccggGTGTAACCTCCGAACCTTAAGTTTAAGAGCTATGCTGGAAACAGCATAGCACTCGTTCCTTTCGA	107
RBP_lib_1997	ACCGGCCAACATACCtatcttgtggaaaggacgaaacaccggGCGTTCCCCTTAAGGTTCGGGTTTAAGAGCTATGCTGGAAACAGCATAGCACTCGTTCCTTTCGA	107
RBP_lib_1998	ACCGGCCAACATACCtatcttgtggaaaggacgaaacaccggTGTAACCTCCGAACCTTAAGGTTTAAGAGCTATGCTGGAAACAGCATAGCACTCGTTCCTTTCGA	107
RBP_lib_1999	ACCGGCCAACATACCtatcttgtggaaaggacgaaacaccggGCTGGTAGGCGTTCCCCTTAGTTTAAGAGCTATGCTGGAAACAGCATAGCACTCGTTCCTTTCGA	107
[truncated: 9,139 more rows]
