# Supplementary material for: CRISPR Screen Identifies the RNA-Binding Protein Eef1a1 as a Key Regulator of Myogenesis
Source: Int J Mol Sci. 2024 Apr 28;25(9):4816. doi: 10.3390/ijms25094816 (PMC11084334; doi:10.3390/ijms25094816)
Supplement: Supplementary file 1 [file ijms-25-04816-s001.zip › Supplemental Table S4. Differentially enriched sgRNAs for Venn D1 vs D5.xlsx]

## Sheet: Sheet 1
SG	1D1	1D5	log2(FC)	Sig		SG	2D1	2D5	log2(FC)	Sig
barcode10000.txt	0.523223	0.159879	-1.7042	Down		barcode10000.txt	0.443043	0.266598	-0.730628	Down
barcode1001.txt	0.66701	0.329751	-1.01412	Down		barcode1001.txt	0.802614	0.380855	-1.07348	Down
barcode1002.txt	0.367455	0.169872	-1.10857	Down		barcode1002.txt	0.516883	0.342769	-0.591185	Down
barcode10031.txt	0.379437	0.209842	-0.851496	Down		barcode10031.txt	0.629249	0.323727	-0.956696	Down
barcode10039.txt	0.77485	0.629525	-0.299223	Down		barcode10039.txt	1.29702	0.76171	-0.76711	Down
barcode10054.txt	1.20222	0.799397	-0.588107	Down		barcode10054.txt	0.866823	0.466547	-0.892288	Down
barcode10059.txt	0.0239644	0	-4.6418	Down		barcode10059.txt	0.288941	0.0285641	-3.29384	Down
barcode10063.txt	1.87721	1.52885	-0.295973	Down		barcode10063.txt	0.947084	0.69506	-0.445802	Down
barcode10076.txt	0.615087	0.229827	-1.41632	Down		barcode10076.txt	0.7063	0.523676	-0.430896	Down
barcode10111.txt	0.926625	0.72945	-0.344755	Down		barcode10111.txt	1.03377	0.285641	-1.85199	Down
barcode10114.txt	0.515235	0.199849	-1.36191	Down		barcode10114.txt	0.683827	0.27612	-1.30523	Down
barcode10126.txt	0.0119822	0	-3.69846	Down		barcode10126.txt	0.247205	0.180906	-0.448338	Down
barcode10127.txt	0.111834	0.0599548	-0.88839	Down		barcode10127.txt	0.337098	0.104735	-1.67699	Down
barcode10128.txt	0.21568	0.0799397	-1.42065	Down		barcode10128.txt	1.1365	0.409419	-1.4707	Down
barcode1013.txt	0.954583	0.64951	-0.554809	Down		barcode1013.txt	0.969557	0.656975	-0.560781	Down
barcode10136.txt	0.0399407	0.0299774	-0.40232	Down		barcode10136.txt	0.715931	0.476069	-0.587638	Down
barcode1014.txt	0.379437	0.179864	-1.07275	Down		barcode1014.txt	0.963136	0.55224	-0.801332	Down
barcode10140.txt	0.66701	0.549586	-0.278903	Down		barcode10140.txt	0.609986	0.247556	-1.29757	Down
barcode10144.txt	0.155769	0.0699473	-1.14382	Down		barcode10144.txt	0.234363	0.180906	-0.371694	Down
barcode10145.txt	0.551182	0.449661	-0.293101	Down		barcode10145.txt	0.584303	0.238034	-1.29196	Down
barcode10158.txt	0.339496	0.169872	-0.994723	Down		barcode10158.txt	0.863612	0.133299	-2.6866	Down
barcode1016.txt	1.19023	0.959277	-0.310934	Down		barcode1016.txt	1.10761	0.76171	-0.539541	Down
barcode10160.txt	0.926625	0.709465	-0.384777	Down		barcode10160.txt	1.16861	0.609368	-0.938271	Down
barcode10162.txt	0.90266	0.60954	-0.565693	Down		barcode10162.txt	1.42223	0.990223	-0.521889	Down
barcode10165.txt	0.4713	0.329751	-0.513958	Down		barcode10165.txt	0.690248	0.352291	-0.968346	Down
barcode10176.txt	0.531211	0.259804	-1.02903	Down		barcode10176.txt	0.523304	0.285641	-0.871157	Down
barcode1018.txt	0.623075	0.169872	-1.8688	Down		barcode1018.txt	0.905348	0.666496	-0.441306	Down
barcode10191.txt	0.0359466	0	-5.20737	Down		barcode10191.txt	0.340308	0.0856924	-1.9771	Down
barcode102.txt	0.978547	0.549586	-0.831148	Down		barcode102.txt	1.28097	0.909291	-0.493964	Down
barcode10202.txt	0.698962	0.489631	-0.51264	Down		barcode10202.txt	0.821876	0.328487	-1.32045	Down
barcode10224.txt	0.830767	0.64951	-0.354607	Down		barcode10224.txt	1.0755	0.637932	-0.752617	Down
barcode10240.txt	0.175739	0.129902	-0.433134	Down		barcode10240.txt	0.536146	0.290402	-0.882303	Down
barcode10255.txt	0.143787	0.0999247	-0.520649	Down		barcode10255.txt	0.78014	0.395137	-0.979582	Down
barcode10282.txt	0.639051	0.429676	-0.571585	Down		barcode10282.txt	0.924611	0.437983	-1.07624	Down
barcode10286.txt	0.806802	0.569571	-0.501597	Down		barcode10286.txt	1.06587	0.842642	-0.338683	Down
barcode10292.txt	0.279585	0.159879	-0.802458	Down		barcode10292.txt	0.584303	0.399898	-0.545949	Down
barcode10300.txt	0.447336	0.289782	-0.624645	Down		barcode10300.txt	0.571461	0.452265	-0.336821	Down
barcode10303.txt	0.287573	0.189857	-0.596446	Down		barcode10303.txt	0.359571	0.0904531	-1.97918	Down
barcode10309.txt	0.842749	0.319759	-1.39532	Down		barcode10309.txt	0.969557	0.680778	-0.509511	Down
barcode10322.txt	0.547188	0.399699	-0.452153	Down		barcode10322.txt	0.959926	0.728385	-0.397744	Down
barcode10343.txt	1.28609	1.07919	-0.252834	Down		barcode10343.txt	1.15576	0.880727	-0.39169	Down
barcode10345.txt	1.94112	1.41893	-0.451811	Down		barcode10345.txt	2.74815	1.92808	-0.511073	Down
barcode1035.txt	0.315532	0.199849	-0.656236	Down		barcode1035.txt	0.892506	0.452265	-0.979122	Down
barcode10353.txt	0.21568	0.0699473	-1.61075	Down		barcode10353.txt	0.385255	0.323727	-0.250326	Down
barcode10355.txt	1.0784	0.749435	-0.52443	Down		barcode10355.txt	0.642091	0.447505	-0.5199	Down
barcode1036.txt	0.23565	0.0699473	-1.73794	Down		barcode1036.txt	0.844349	0.323727	-1.38032	Down
barcode10360.txt	2.14082	1.4589	-0.552969	Down		barcode10360.txt	1.49286	1.10448	-0.434374	Down
barcode10361.txt	2.13683	1.77866	-0.264545	Down		barcode10361.txt	1.43186	1.12352	-0.349588	Down
barcode1037.txt	0.674998	0.229827	-1.55021	Down		barcode1037.txt	1.0145	0.55224	-0.876219	Down
barcode10374.txt	2.57618	2.14838	-0.26187	Down		barcode10374.txt	2.66468	2.21848	-0.26428	Down
barcode1038.txt	0.131804	0.0699473	-0.904484	Down		barcode1038.txt	0.654933	0.190427	-1.77675	Down
barcode10386.txt	0.391419	0.259804	-0.589428	Down		barcode10386.txt	0.548988	0.452265	-0.279044	Down
barcode1039.txt	0.0159763	0	-4.08545	Down		barcode1039.txt	0.173365	0.109496	-0.658115	Down
barcode10393.txt	1.22618	0.919307	-0.41516	Down		barcode10393.txt	1.30023	0.76171	-0.770674	Down
barcode10400.txt	1.13032	0.779412	-0.535701	Down		barcode10400.txt	1.4126	0.580804	-1.28077	Down
barcode10407.txt	1.80133	1.35898	-0.40628	Down		barcode10407.txt	1.59239	1.33299	-0.256345	Down
barcode10424.txt	0.331508	0.199849	-0.727275	Down		barcode10424.txt	0.648512	0.452265	-0.519	Down
barcode1043.txt	0.0758874	0.0299774	-1.31153	Down		barcode1043.txt	0.516883	0.109496	-2.22863	Down
barcode10430.txt	0.351478	0.0899322	-1.95467	Down		barcode10430.txt	0.731984	0.228513	-1.67521	Down
barcode10439.txt	0.295561	0.219834	-0.425366	Down		barcode10439.txt	0.545777	0.376094	-0.536028	Down
barcode10440.txt	1.20621	0.929299	-0.375909	Down		barcode10440.txt	1.18466	0.409419	-1.53052	Down
barcode10447.txt	0.515235	0.139895	-1.87341	Down		barcode10447.txt	1.67907	0.576043	-1.54177	Down
barcode1047.txt	1.09837	0.799397	-0.457888	Down		barcode1047.txt	0.963136	0.476069	-1.01504	Down
barcode10479.txt	1.29807	1.0592	-0.293144	Down		barcode10479.txt	1.38692	1.12828	-0.297514	Down
barcode10480.txt	0.786832	0.399699	-0.975371	Down		barcode10480.txt	0.818666	0.41418	-0.9813	Down
barcode10496.txt	1.29008	0.829375	-0.63675	Down		barcode10496.txt	1.28097	0.48559	-1.39758	Down
barcode10497.txt	2.24467	1.53884	-0.544364	Down		barcode10497.txt	1.87812	1.46629	-0.356898	Down
barcode10499.txt	2.25266	1.57881	-0.512517	Down		barcode10499.txt	1.73043	1.45201	-0.252924	Down
barcode105.txt	0.45133	0.339744	-0.408688	Down		barcode105.txt	0.770509	0.633171	-0.28281	Down
barcode10509.txt	0.479289	0.369721	-0.373567	Down		barcode10509.txt	0.757667	0.466547	-0.698355	Down
barcode10511.txt	2.85576	2.23831	-0.351325	Down		barcode10511.txt	2.78025	1.70433	-0.705688	Down
barcode10513.txt	1.32204	1.09917	-0.266126	Down		barcode10513.txt	0.953505	0.671257	-0.50574	Down
barcode10518.txt	0.639051	0.399699	-0.67567	Down		barcode10518.txt	0.85077	0.461787	-0.880117	Down
barcode1052.txt	0.403401	0.139895	-1.52117	Down		barcode1052.txt	0.773719	0.395137	-0.967674	Down
barcode1053.txt	1.1463	0.579563	-0.982716	Down		barcode1053.txt	1.02735	0.652214	-0.654697	Down
barcode10545.txt	0.395413	0.319759	-0.305515	Down		barcode10545.txt	0.741615	0.437983	-0.758448	Down
barcode10552.txt	0.659022	0.479638	-0.457562	Down		barcode10552.txt	0.56504	0.433223	-0.382469	Down
barcode10558.txt	1.1463	0.959277	-0.256719	Down		barcode10558.txt	1.39334	0.775992	-0.843608	Down
barcode10563.txt	0.263609	0.179864	-0.548952	Down		barcode10563.txt	0.622828	0.342769	-0.859707	Down
barcode10564.txt	0.283579	0.209842	-0.432669	Down		barcode10564.txt	0.404517	0.309445	-0.385427	Down
barcode10575.txt	0.0119822	0	-3.69846	Down		barcode10575.txt	0.147681	0.0809317	-0.859726	Down
barcode10577.txt	0.734909	0.499623	-0.555802	Down		barcode10577.txt	1.17503	0.656975	-0.837816	Down
barcode10579.txt	0.90266	0.589555	-0.613708	Down		barcode10579.txt	0.908559	0.604607	-0.586784	Down
barcode10583.txt	0.347484	0.239819	-0.533143	Down		barcode10583.txt	0.526514	0.238034	-1.14199	Down
barcode10587.txt	0.339496	0.269797	-0.330429	Down		barcode10587.txt	1.3516	0.656975	-1.03963	Down
barcode10595.txt	0.0798814	0.0399699	-0.981245	Down		barcode10595.txt	0.433411	0.0380855	-3.47436	Down
barcode10598.txt	0.211686	0.109917	-0.939241	Down		barcode10598.txt	0.619618	0.504633	-0.295615	Down
barcode10610.txt	0.738903	0.499623	-0.563611	Down		barcode10610.txt	0.529725	0.442744	-0.258237	Down
barcode10622.txt	0.523223	0.199849	-1.38407	Down		barcode10622.txt	0.844349	0.48559	-0.796841	Down
barcode10625.txt	0.814791	0.60954	-0.418112	Down		barcode10625.txt	0.905348	0.599847	-0.593069	Down
barcode10630.txt	1.09038	0.899322	-0.277643	Down		barcode10630.txt	1.18466	0.847402	-0.482867	Down
barcode10646.txt	0.938607	0.60954	-0.62197	Down		barcode10646.txt	0.947084	0.428462	-1.14248	Down
barcode10649.txt	0.211686	0	-7.73258	Down		barcode10649.txt	0.308204	0.133299	-1.20311	Down
barcode10660.txt	1.32603	0.919307	-0.528016	Down		barcode10660.txt	1.23924	1.00451	-0.302694	Down
barcode10667.txt	0.814791	0.539593	-0.593656	Down		barcode10667.txt	1.47039	0.97118	-0.597882	Down
barcode10670.txt	1.42189	1.1891	-0.257737	Down		barcode10670.txt	1.42544	0.97118	-0.553125	Down
barcode10672.txt	0.055917	0.0399699	-0.474296	Down		barcode10672.txt	0.308204	0.13806	-1.15285	Down
barcode10686.txt	0.742897	0.60954	-0.285017	Down		barcode10686.txt	0.760878	0.447505	-0.764437	Down
barcode10693.txt	1.17825	0.709465	-0.731035	Down		barcode10693.txt	1.08192	0.823599	-0.393166	Down
barcode10702.txt	0.351478	0.209842	-0.741374	Down		barcode10702.txt	0.767299	0.214231	-1.83578	Down
barcode10720.txt	0.515235	0.329751	-0.642281	Down		barcode10720.txt	0.985609	0.642693	-0.616107	Down
barcode10724.txt	0.355472	0.209842	-0.757629	Down		barcode10724.txt	1.05303	0.376094	-1.48292	Down
barcode10730.txt	0.507247	0.379714	-0.416823	Down		barcode10730.txt	0.475147	0.180906	-1.38821	Down
barcode10731.txt	0.738903	0.339744	-1.11865	Down		barcode10731.txt	0.443043	0.252316	-0.809758	Down
barcode10738.txt	0.651034	0.499623	-0.381221	Down		barcode10738.txt	0.654933	0.476069	-0.459351	Down
barcode10746.txt	1.29008	0.979262	-0.397345	Down		barcode10746.txt	1.55707	1.16637	-0.4165	Down
barcode10748.txt	0.778844	0.64951	-0.261614	Down		barcode10748.txt	1.03377	0.642693	-0.684861	Down
barcode10776.txt	0.615087	0.509616	-0.270896	Down		barcode10776.txt	0.876454	0.41418	-1.07959	Down
barcode10808.txt	0.690974	0.389706	-0.824634	Down		barcode10808.txt	0.9214	0.566522	-0.700717	Down
barcode1082.txt	0.487277	0.289782	-0.747763	Down		barcode1082.txt	0.99203	0.595086	-0.736318	Down
barcode10833.txt	1.07041	0.759427	-0.49463	Down		barcode10833.txt	1.12366	0.82836	-0.439418	Down
barcode10842.txt	0.459318	0.329751	-0.476884	Down		barcode10842.txt	0.70951	0.285641	-1.30961	Down
barcode10846.txt	0.635057	0.489631	-0.374519	Down		barcode10846.txt	0.70951	0.476069	-0.574659	Down
barcode10849.txt	0.726921	0.529601	-0.456155	Down		barcode10849.txt	0.664564	0.452265	-0.554222	Down
barcode1085.txt	1.26213	0.909314	-0.472562	Down		barcode1085.txt	1.1044	0.41894	-1.39631	Down
barcode1086.txt	0.599111	0.489631	-0.290591	Down		barcode1086.txt	1.35802	0.766471	-0.824385	Down
barcode10865.txt	0.295561	0.199849	-0.562217	Down		barcode10865.txt	0.687037	0.452265	-0.602131	Down
barcode10868.txt	0.0798814	0.0299774	-1.38459	Down		barcode10868.txt	0.831508	0.123778	-2.7381	Down
barcode10869.txt	0.163757	0.0699473	-1.21552	Down		barcode10869.txt	0.272889	0.119017	-1.19035	Down
barcode10870.txt	0.846743	0.209842	-2.00747	Down		barcode10870.txt	0.751246	0.152342	-2.29445	Down
barcode10907.txt	0.211686	0.109917	-0.939241	Down		barcode10907.txt	0.382044	0.157103	-1.27665	Down
barcode10911.txt	0.271597	0.209842	-0.370608	Down		barcode10911.txt	0.577882	0.271359	-1.08776	Down
barcode10928.txt	1.76937	1.46889	-0.268343	Down		barcode10928.txt	1.24566	0.861684	-0.531159	Down
barcode10929.txt	0.850737	0.669495	-0.345181	Down		barcode10929.txt	0.712721	0.385616	-0.88446	Down
barcode10931.txt	2.73594	2.13839	-0.355365	Down		barcode10931.txt	2.17027	1.63768	-0.406006	Down
barcode10955.txt	1.13032	0.869345	-0.378351	Down		barcode10955.txt	1.82354	1.24254	-0.553079	Down
barcode10957.txt	0.866713	0.439668	-0.977525	Down		barcode10957.txt	0.661354	0.509394	-0.375991	Down
barcode10966.txt	0.351478	0.269797	-0.380325	Down		barcode10966.txt	0.699879	0.576043	-0.280486	Down
barcode10969.txt	0.543194	0.279789	-0.954634	Down		barcode10969.txt	0.609986	0.509394	-0.25953	Down
barcode10974.txt	0.671004	0.539593	-0.313927	Down		barcode10974.txt	1.71438	0.314205	-2.44417	Down
barcode10976.txt	0.870708	0.709465	-0.29508	Down		barcode10976.txt	1.03698	0.490351	-1.07895	Down
barcode10987.txt	1.34201	0.709465	-0.918632	Down		barcode10987.txt	1.21676	0.975941	-0.317889	Down
barcode11000.txt	0.227662	0.00999247	-4.37863	Down		barcode11000.txt	0.157312	0.123778	-0.343411	Down
barcode11006.txt	0.359466	0.199849	-0.843751	Down		barcode11006.txt	0.821876	0.223752	-1.87234	Down
barcode11017.txt	0.758874	0.389706	-0.959675	Down		barcode11017.txt	0.815455	0.385616	-1.07847	Down
barcode11029.txt	0.874702	0.72945	-0.261654	Down		barcode11029.txt	1.05303	0.599847	-0.810846	Down
barcode1103.txt	0.894672	0.399699	-1.16045	Down		barcode1103.txt	0.789772	0.557	-0.502995	Down
barcode11040.txt	0.643045	0.529601	-0.279536	Down		barcode11040.txt	0.70951	0.518915	-0.45058	Down
barcode11051.txt	0.798814	0.569571	-0.48726	Down		barcode11051.txt	0.770509	0.495111	-0.637019	Down
barcode11063.txt	0.587128	0.249812	-1.22953	Down		barcode11063.txt	1.09798	0.214231	-2.3522	Down
barcode11065.txt	0.766862	0.329751	-1.2151	Down		barcode11065.txt	0.558619	0.371334	-0.587849	Down
barcode11067.txt	1.23417	0.709465	-0.797872	Down		barcode11067.txt	1.09476	0.647453	-0.756863	Down
barcode11068.txt	0.930619	0.569571	-0.707334	Down		barcode11068.txt	1.1365	0.852163	-0.414974	Down
barcode11071.txt	0.575146	0.289782	-0.9865	Down		barcode11071.txt	0.231153	0.133299	-0.789623	Down
barcode11082.txt	1.05843	0.549586	-0.944248	Down		barcode11082.txt	1.08834	0.27612	-1.97488	Down
barcode11092.txt	0.706951	0.569571	-0.311243	Down		barcode11092.txt	0.805824	0.471308	-0.772526	Down
barcode11108.txt	0.55917	0.419684	-0.413129	Down		barcode11108.txt	0.953505	0.295163	-1.68836	Down
barcode1112.txt	1.17825	0.969269	-0.281414	Down		barcode1112.txt	1.87812	1.36156	-0.463738	Down
barcode11123.txt	1.17426	0.889329	-0.400565	Down		barcode11123.txt	0.805824	0.647453	-0.315251	Down
barcode11127.txt	0.910648	0.749435	-0.28075	Down		barcode11127.txt	1.18787	0.842642	-0.494886	Down
barcode11138.txt	0.90266	0.539593	-0.741237	Down		barcode11138.txt	1.15576	0.942616	-0.293822	Down
barcode1124.txt	0.183727	0.149887	-0.291929	Down		barcode1124.txt	0.821876	0.318966	-1.36276	Down
barcode1126.txt	0.351478	0.239819	-0.549584	Down		barcode1126.txt	0.536146	0.266598	-1.00524	Down
barcode1129.txt	0.838755	0.659503	-0.346404	Down		barcode1129.txt	1.5956	1.19493	-0.416863	Down
barcode1133.txt	0.439348	0.279789	-0.649157	Down		barcode1133.txt	0.799403	0.647453	-0.303724	Down
barcode1148.txt	0.511241	0.249812	-1.03022	Down		barcode1148.txt	1.40297	0.495111	-1.50077	Down
barcode1156.txt	0.0159763	0	-4.08545	Down		barcode1156.txt	0.292151	0	-8.1955	Down
barcode1165.txt	0.499259	0.229827	-1.11586	Down		barcode1165.txt	0.20868	0.0952137	-1.12387	Down
barcode1166.txt	0.782838	0.60954	-0.360469	Down		barcode1166.txt	0.773719	0.252316	-1.61273	Down
barcode1171.txt	0.45133	0.339744	-0.408688	Down		barcode1171.txt	0.9214	0.290402	-1.66238	Down
barcode1172.txt	0.283579	0.139895	-1.01421	Down		barcode1172.txt	0.616407	0.390376	-0.657666	Down
barcode1176.txt	0.195709	0.0499623	-1.94856	Down		barcode1176.txt	0.934242	0.380855	-1.29232	Down
barcode1193.txt	0.291567	0	-8.19262	Down		barcode1193.txt	0.250415	0.0666496	-1.89392	Down
barcode1198.txt	0.247632	0.0999247	-1.30074	Down		barcode1198.txt	0.799403	0.466547	-0.775614	Down
barcode120.txt	0.239644	0.11991	-0.992973	Down		barcode120.txt	0.471937	0.185667	-1.34118	Down
barcode1202.txt	0.68698	0.309766	-1.14654	Down		barcode1202.txt	0.914979	0.471308	-0.955587	Down
barcode1203.txt	0.962571	0.599548	-0.682112	Down		barcode1203.txt	1.23281	0.504633	-1.28696	Down
barcode1207.txt	0.822779	0.569571	-0.529851	Down		barcode1207.txt	1.28739	0.709342	-0.858985	Down
barcode1244.txt	1.1423	0.839367	-0.444118	Down		barcode1244.txt	0.985609	0.647453	-0.605476	Down
barcode1245.txt	0.383431	0.309766	-0.306893	Down		barcode1245.txt	0.664564	0.509394	-0.382967	Down
barcode1248.txt	1.09438	0.839367	-0.382334	Down		barcode1248.txt	1.0755	0.376094	-1.51335	Down
barcode1257.txt	1.69349	0.759427	-1.15597	Down		barcode1257.txt	1.55386	1.114	-0.47974	Down
barcode1258.txt	1.68949	1.11916	-0.593743	Down		barcode1258.txt	1.70154	1.0902	-0.641777	Down
barcode1262.txt	1.04245	0.599548	-0.797014	Down		barcode1262.txt	0.9214	0.457026	-1.00996	Down
barcode1279.txt	0.0718933	0.0299774	-1.23457	Down		barcode1279.txt	0.731984	0.13806	-2.39807	Down
barcode128.txt	0.0439348	0	-5.48976	Down		barcode128.txt	0.42699	0.295163	-0.531189	Down
barcode1282.txt	1.15429	0.719458	-0.681265	Down		barcode1282.txt	1.83317	1.23778	-0.566208	Down
barcode1284.txt	0.147781	0.0999247	-0.559908	Down		barcode1284.txt	0.56825	0.0238034	-4.52045	Down
barcode1288.txt	0.762868	0.549586	-0.472356	Down		barcode1288.txt	0.934242	0.718864	-0.377616	Down
barcode1290.txt	0.251626	0.109917	-1.18752	Down		barcode1290.txt	0.481568	0.257077	-0.90293	Down
barcode1295.txt	0.479289	0.279789	-0.774415	Down		barcode1295.txt	0.593934	0.252316	-1.23179	Down
barcode1302.txt	0.694968	0.539593	-0.364479	Down		barcode1302.txt	0.866823	0.609368	-0.507721	Down
barcode1312.txt	0.635057	0.439668	-0.529463	Down		barcode1312.txt	1.11724	0.380855	-1.55013	Down
barcode1315.txt	0.878696	0.509616	-0.784766	Down		barcode1315.txt	1.09476	0.752189	-0.540855	Down
barcode1317.txt	0.0599111	0.0299774	-0.975488	Down		barcode1317.txt	0.35636	0.152342	-1.22063	Down
barcode1331.txt	1.04645	0.479638	-1.12385	Down		barcode1331.txt	1.24887	0.82836	-0.591705	Down
barcode1334.txt	1.05843	0.589555	-0.843142	Down		barcode1334.txt	1.07229	0.41894	-1.35379	Down
barcode134.txt	1.22219	0.719458	-0.763658	Down		barcode134.txt	1.1975	0.814078	-0.55622	Down
barcode1352.txt	0.455324	0.309766	-0.554228	Down		barcode1352.txt	0.321045	0.242795	-0.401595	Down
barcode1357.txt	0.515235	0.369721	-0.477694	Down		barcode1357.txt	1.20392	0.385616	-1.63997	Down
barcode1366.txt	0.938607	0.589555	-0.669984	Down		barcode1366.txt	1.10761	0.837881	-0.40221	Down
barcode1379.txt	0.55917	0.469646	-0.251223	Down		barcode1379.txt	0.853981	0.55224	-0.627987	Down
barcode138.txt	1.12633	0.909314	-0.308471	Down		barcode138.txt	2.02259	1.55198	-0.381871	Down
barcode1382.txt	0.970559	0.439668	-1.14061	Down		barcode1382.txt	1.14292	0.309445	-1.88158	Down
barcode1387.txt	0.786832	0.599548	-0.391609	Down		barcode1387.txt	0.931032	0.76171	-0.289245	Down
barcode1388.txt	0.0798814	0.0399699	-0.981245	Down		barcode1388.txt	0.548988	0.0428462	-3.64888	Down
barcode1394.txt	0.203698	0.00999247	-4.21891	Down		barcode1394.txt	0.276099	0.0476069	-2.51117	Down
barcode1395.txt	1.98905	1.66874	-0.253178	Down		barcode1395.txt	1.05303	0.83312	-0.337587	Down
barcode1399.txt	0.115828	0.0899322	-0.361524	Down		barcode1399.txt	0.687037	0.119017	-2.51925	Down
barcode140.txt	0.0758874	0.0499623	-0.593315	Down		barcode140.txt	0.475147	0.13806	-1.7757	Down
barcode143.txt	0.702957	0.549586	-0.354519	Down		barcode143.txt	1.55707	0.961659	-0.694664	Down
barcode1434.txt	0.135798	0.0999247	-0.438773	Down		barcode1434.txt	0.536146	0.104735	-2.34486	Down
barcode1436.txt	0.415383	0.109917	-1.90843	Down		barcode1436.txt	0.452674	0.176145	-1.35672	Down
barcode1437.txt	0.551182	0.0699473	-2.96032	Down		barcode1437.txt	0.773719	0.428462	-0.851144	Down
barcode1441.txt	0.591123	0.269797	-1.12869	Down		barcode1441.txt	0.603565	0.20471	-1.55529	Down
barcode1442.txt	0.0838755	0.0599548	-0.477608	Down		barcode1442.txt	0.587513	0.361812	-0.697851	Down
barcode1443.txt	0.822779	0.359729	-1.19134	Down		barcode1443.txt	1.36123	0.947377	-0.522441	Down
barcode1444.txt	1.03846	0.539593	-0.943217	Down		barcode1444.txt	0.805824	0.618889	-0.380243	Down
barcode145.txt	2.05695	1.49887	-0.456368	Down		barcode145.txt	1.52176	1.21398	-0.325757	Down
barcode1451.txt	0.770856	0.419684	-0.875596	Down		barcode1451.txt	1.52818	0.595086	-1.35916	Down
barcode1457.txt	0.619081	0.439668	-0.492763	Down		barcode1457.txt	0.963136	0.6903	-0.479926	Down
barcode1458.txt	0.227662	0.149887	-0.599749	Down		barcode1458.txt	0.430201	0.342769	-0.326919	Down
barcode146.txt	2.03698	1.56882	-0.376541	Down		barcode146.txt	1.69191	1.21874	-0.472936	Down
barcode1463.txt	0.982542	0.80939	-0.27937	Down		barcode1463.txt	1.41902	0.999744	-0.504839	Down
barcode1472.txt	0.698962	0.349736	-0.996891	Down		barcode1472.txt	1.14934	0.604607	-0.925609	Down
barcode1474.txt	0.379437	0.269797	-0.490447	Down		barcode1474.txt	1.05624	0.76171	-0.471096	Down
barcode1478.txt	0.227662	0.149887	-0.599749	Down		barcode1478.txt	1.11724	0.604607	-0.884773	Down
barcode148.txt	0.678992	0.279789	-1.27603	Down		barcode148.txt	0.401307	0.238034	-0.751078	Down
barcode1483.txt	0.810796	0.479638	-0.756166	Down		barcode1483.txt	0.931032	0.666496	-0.481619	Down
barcode1491.txt	0.0718933	0	-6.18771	Down		barcode1491.txt	0.256836	0.20471	-0.325847	Down
barcode1493.txt	0.830767	0.539593	-0.621636	Down		barcode1493.txt	1.3516	0.871206	-0.632996	Down
barcode150.txt	0.0199704	0	-4.39028	Down		barcode150.txt	0.21189	0.0428462	-2.27958	Down
barcode1504.txt	1.24615	1.02922	-0.275677	Down		barcode1504.txt	1.03698	0.785513	-0.400231	Down
barcode1513.txt	0.655028	0.539593	-0.279213	Down		barcode1513.txt	0.597144	0.447505	-0.415371	Down
barcode1517.txt	0.267603	0.219834	-0.28251	Down		barcode1517.txt	0.513673	0.223752	-1.19532	Down
barcode1519.txt	0.32352	0.189857	-0.765815	Down		barcode1519.txt	0.886085	0.685539	-0.369731	Down
barcode1532.txt	0.147781	0.0899322	-0.710324	Down		barcode1532.txt	0.85077	0.704582	-0.271651	Down
barcode1547.txt	1.54571	1.08918	-0.504634	Down		barcode1547.txt	1.55065	1.21398	-0.352876	Down
barcode1554.txt	1.2102	0.919307	-0.396255	Down		barcode1554.txt	1.10119	0.885488	-0.314195	Down
barcode1555.txt	0.631063	0.439668	-0.520375	Down		barcode1555.txt	1.20071	0.614129	-0.966129	Down
barcode1559.txt	0.826773	0.639518	-0.369996	Down		barcode1559.txt	0.802614	0.461787	-0.796155	Down
barcode1572.txt	0.0159763	0	-4.08545	Down		barcode1572.txt	0.85077	0.0571282	-3.87315	Down
barcode1573.txt	0.271597	0.109917	-1.29729	Down		barcode1573.txt	0.42378	0.257077	-0.718913	Down
barcode1594.txt	2.52026	1.86859	-0.431422	Down		barcode1594.txt	1.76254	1.32347	-0.413057	Down
barcode16.txt	0.223668	0.149887	-0.574326	Down		barcode16.txt	1.02735	0.509394	-1.01064	Down
barcode1601.txt	0.599111	0.329751	-0.859481	Down		barcode1601.txt	0.378834	0.257077	-0.557565	Down
barcode1612.txt	0.211686	0.129902	-0.700236	Down		barcode1612.txt	0.468726	0.214231	-1.12594	Down
barcode1617.txt	0.0718933	0.0499623	-0.516355	Down		barcode1617.txt	0.542567	0.195188	-1.47022	Down
barcode1618.txt	1.02648	0.759427	-0.434223	Down		barcode1618.txt	1.18145	0.62365	-0.920656	Down
barcode1625.txt	0.36346	0.269797	-0.428553	Down		barcode1625.txt	0.378834	0.233274	-0.697173	Down
barcode1626.txt	0.0639051	0.00999247	-2.56182	Down		barcode1626.txt	0.340308	0.147581	-1.19982	Down
barcode1641.txt	0.563164	0.229827	-1.2893	Down		barcode1641.txt	1.04982	0.718864	-0.545718	Down
barcode1642.txt	0.555176	0.459653	-0.271859	Down		barcode1642.txt	0.619618	0.314205	-0.977413	Down
barcode1648.txt	0.331508	0.269797	-0.296179	Down		barcode1648.txt	0.593934	0.299923	-0.983334	Down
barcode1650.txt	1.32204	1.03922	-0.34697	Down		barcode1650.txt	1.62449	1.15209	-0.495374	Down
barcode1652.txt	2.45635	1.95852	-0.326603	Down		barcode1652.txt	2.56515	2.10898	-0.282375	Down
barcode1664.txt	1.04245	0.569571	-0.870888	Down		barcode1664.txt	0.651722	0.480829	-0.437947	Down
barcode1666.txt	2.20473	1.7187	-0.359094	Down		barcode1666.txt	2.34042	1.87571	-0.319178	Down
barcode1667.txt	0.698962	0.459653	-0.603596	Down		barcode1667.txt	1.55386	1.17589	-0.401805	Down
barcode1668.txt	0.351478	0.289782	-0.277599	Down		barcode1668.txt	0.526514	0.304684	-0.78717	Down
barcode1676.txt	0.934613	0.759427	-0.299101	Down		barcode1676.txt	0.754457	0.376094	-1.00242	Down
barcode1683.txt	1.54571	1.14913	-0.427397	Down		barcode1683.txt	1.53781	0.96642	-0.669599	Down
barcode1687.txt	0.407395	0.229827	-0.823156	Down		barcode1687.txt	0.548988	0.41418	-0.405663	Down
barcode1691.txt	1.13831	0.919307	-0.307974	Down		barcode1691.txt	1.27134	0.942616	-0.431212	Down
barcode1715.txt	2.32056	1.75867	-0.399784	Down		barcode1715.txt	1.88454	1.25682	-0.584048	Down
barcode1717.txt	2.32455	1.75867	-0.402263	Down		barcode1717.txt	1.83959	1.2711	-0.532952	Down
barcode1719.txt	1.0105	0.179864	-2.48352	Down		barcode1719.txt	0.953505	0.799795	-0.253319	Down
barcode1725.txt	0.303549	0.11991	-1.33275	Down		barcode1725.txt	0.654933	0.428462	-0.611018	Down
barcode1726.txt	0.814791	0.439668	-0.888505	Down		barcode1726.txt	0.943874	0.618889	-0.608111	Down
barcode1732.txt	0.335502	0.0999247	-1.73734	Down		barcode1732.txt	0.593934	0.304684	-0.960689	Down
barcode1767.txt	0.443342	0.359729	-0.300756	Down		barcode1767.txt	0.321045	0.20947	-0.613648	Down
barcode1773.txt	0.706951	0.489631	-0.529011	Down		barcode1773.txt	0.914979	0.333248	-1.4544	Down
barcode1778.txt	0.643045	0.529601	-0.279536	Down		barcode1778.txt	0.629249	0.366573	-0.777891	Down
barcode1779.txt	0.267603	0.219834	-0.28251	Down		barcode1779.txt	1.09155	0.285641	-1.93039	Down
barcode1791.txt	0.890678	0.589555	-0.59445	Down		barcode1791.txt	0.959926	0.766471	-0.324313	Down
barcode1796.txt	0.103846	0.0199849	-2.32084	Down		barcode1796.txt	0.622828	0.314205	-0.984857	Down
barcode1797.txt	0.0678992	0.0199849	-1.71513	Down		barcode1797.txt	0.687037	0.123778	-2.46312	Down
barcode1800.txt	0.0519229	0.00999247	-2.26738	Down		barcode1800.txt	0.147681	0.0666496	-1.13607	Down
barcode1801.txt	0.495265	0.319759	-0.629621	Down		barcode1801.txt	0.481568	0.357052	-0.430565	Down
barcode1808.txt	0.283579	0.0899322	-1.64597	Down		barcode1808.txt	0.837929	0.428462	-0.966018	Down
barcode1817.txt	0.746891	0.599548	-0.316549	Down		barcode1817.txt	1.11403	0.742667	-0.58435	Down
barcode1821.txt	1.24216	0.979262	-0.342769	Down		barcode1821.txt	0.982399	0.785513	-0.322306	Down
barcode183.txt	0.43136	0.349736	-0.301845	Down		barcode183.txt	1.09155	0.41894	-1.37945	Down
barcode184.txt	0.515235	0.199849	-1.36191	Down		barcode184.txt	0.545777	0.34753	-0.64967	Down
barcode1842.txt	0.367455	0.289782	-0.341551	Down		barcode1842.txt	0.414149	0.152342	-1.43687	Down
barcode186.txt	0.575146	0.389706	-0.560351	Down		barcode186.txt	1.24245	0.814078	-0.609334	Down
barcode1861.txt	0.547188	0.409691	-0.416616	Down		barcode1861.txt	0.520094	0.218992	-1.24409	Down
barcode1865.txt	0.706951	0.449661	-0.651606	Down		barcode1865.txt	1.09155	0.357052	-1.60947	Down
barcode1903.txt	0.651034	0.519608	-0.324748	Down		barcode1903.txt	1.60844	0.699821	-1.19944	Down
barcode191.txt	0.706951	0.529601	-0.416022	Down		barcode191.txt	1.1044	0.742667	-0.571835	Down
barcode1914.txt	0.970559	0.469646	-1.04566	Down		barcode1914.txt	0.606776	0.385616	-0.652639	Down
barcode1932.txt	0.339496	0.269797	-0.330429	Down		barcode1932.txt	0.414149	0.299923	-0.464232	Down
barcode1937.txt	0.303549	0.0599548	-2.32086	Down		barcode1937.txt	0.192627	0.076171	-1.32715	Down
barcode1942.txt	0.858725	0.469646	-0.869234	Down		barcode1942.txt	0.886085	0.476069	-0.894876	Down
barcode1952.txt	1.31405	1.01923	-0.36622	Down		barcode1952.txt	1.5667	1.15209	-0.443151	Down
barcode196.txt	0.487277	0.329751	-0.561952	Down		barcode196.txt	1.44149	0.576043	-1.32181	Down
barcode1960.txt	0.770856	0.619533	-0.314824	Down		barcode1960.txt	0.959926	0.604607	-0.666042	Down
barcode1961.txt	0.563164	0.399699	-0.493597	Down		barcode1961.txt	0.767299	0.361812	-1.08244	Down
barcode1975.txt	0.167751	0.11991	-0.480967	Down		barcode1975.txt	0.333887	0.190427	-0.806877	Down
barcode1978.txt	0.283579	0.179864	-0.653921	Down		barcode1978.txt	0.475147	0.152342	-1.63465	Down
barcode198.txt	0.367455	0.239819	-0.613536	Down		barcode198.txt	0.391675	0.257077	-0.605535	Down
barcode1982.txt	0.36346	0.159879	-1.17978	Down		barcode1982.txt	0.410938	0.0999744	-2.02844	Down
barcode1983.txt	0.331508	0.199849	-0.727275	Down		barcode1983.txt	0.63567	0.147581	-2.09929	Down
barcode1986.txt	1.07441	0.669495	-0.681581	Down		barcode1986.txt	0.937453	0.647453	-0.533281	Down
barcode1987.txt	1.73343	1.36897	-0.340317	Down		barcode1987.txt	1.64696	1.17589	-0.485705	Down
barcode1994.txt	1.01449	0.76942	-0.398465	Down		barcode1994.txt	1.24245	0.97118	-0.355048	Down
barcode2001.txt	1.20222	0.979262	-0.295656	Down		barcode2001.txt	2.59726	1.47105	-0.819715	Down
barcode2013.txt	0.611093	0.509616	-0.261513	Down		barcode2013.txt	1.6277	0.97118	-0.744425	Down
barcode2026.txt	1.46183	1.10916	-0.39799	Down		barcode2026.txt	2.35647	1.43773	-0.712448	Down
barcode2027.txt	0.607099	0.349736	-0.793919	Down		barcode2027.txt	1.34839	0.676018	-0.995043	Down
barcode2044.txt	0.183727	0.139895	-0.390781	Down		barcode2044.txt	0.189417	0.133299	-0.50371	Down
barcode2045.txt	0.259615	0.169872	-0.609003	Down		barcode2045.txt	1.02735	0.466547	-1.13714	Down
barcode2049.txt	0.726921	0.349736	-1.0534	Down		barcode2049.txt	1.45113	0.771231	-0.911061	Down
barcode2062.txt	0.159763	0.0999247	-0.671655	Down		barcode2062.txt	0.455885	0.190427	-1.25503	Down
barcode2063.txt	0.830767	0.519608	-0.675981	Down		barcode2063.txt	0.796193	0.561761	-0.502406	Down
barcode2072.txt	0.718933	0.369721	-0.957528	Down		barcode2072.txt	0.77693	0.442744	-0.809913	Down
barcode2089.txt	0.21568	0.179864	-0.260657	Down		barcode2089.txt	0.619618	0.309445	-0.999369	Down
barcode2094.txt	0.615087	0.499623	-0.299409	Down		barcode2094.txt	1.71117	0.742667	-1.2031	Down
barcode2099.txt	0.355472	0.189857	-0.901299	Down		barcode2099.txt	0.609986	0.261838	-1.21697	Down
barcode2112.txt	0.115828	0.0599548	-0.938575	Down		barcode2112.txt	0.902138	0.238034	-1.91773	Down
barcode2126.txt	0.0199704	0	-4.39028	Down		barcode2126.txt	0.539356	0	-9.07777	Down
barcode213.txt	0.850737	0.619533	-0.456901	Down		barcode213.txt	0.809034	0.647453	-0.32098	Down
barcode2145.txt	0.227662	0.0999247	-1.17994	Down		barcode2145.txt	0.407728	0.247556	-0.717571	Down
barcode2146.txt	0.211686	0.109917	-0.939241	Down		barcode2146.txt	0.876454	0.214231	-2.02744	Down
barcode2151.txt	0.551182	0.309766	-0.829313	Down		barcode2151.txt	0.898927	0.652214	-0.462252	Down
barcode2152.txt	0.523223	0.229827	-1.18337	Down		barcode2152.txt	0.809034	0.514154	-0.652979	Down
barcode2161.txt	0.0479289	0.00999247	-2.15417	Down		barcode2161.txt	0.471937	0.0380855	-3.59694	Down
barcode2163.txt	0.399407	0.269797	-0.564258	Down		barcode2163.txt	0.561829	0.20471	-1.45209	Down
barcode2170.txt	1.33402	0.989254	-0.43099	Down		barcode2170.txt	1.08513	0.571282	-0.924402	Down
barcode2177.txt	0.730915	0.539593	-0.437133	Down		barcode2177.txt	1.37407	0.718864	-0.933714	Down
barcode2179.txt	0.347484	0.269797	-0.363884	Down		barcode2179.txt	0.446253	0.261838	-0.766919	Down
barcode2182.txt	0.930619	0.309766	-1.58391	Down		barcode2182.txt	0.645301	0.266598	-1.27214	Down
barcode2188.txt	0.99053	0.549586	-0.848689	Down		barcode2188.txt	0.950294	0.718864	-0.402168	Down
barcode2196.txt	0.694968	0.549586	-0.338055	Down		barcode2196.txt	0.754457	0.528436	-0.512892	Down
barcode2198.txt	0.810796	0.509616	-0.66888	Down		barcode2198.txt	0.866823	0.576043	-0.588721	Down
barcode2207.txt	0.742897	0.539593	-0.46056	Down		barcode2207.txt	1.03377	0.609368	-0.761554	Down
barcode2208.txt	1.2781	0.959277	-0.41361	Down		barcode2208.txt	1.23602	0.933095	-0.405234	Down
barcode2221.txt	0.706951	0.559578	-0.336733	Down		barcode2221.txt	1.30665	0.856924	-0.608061	Down
barcode2225.txt	1.4179	0.72945	-0.957911	Down		barcode2225.txt	1.77538	1.3568	-0.387675	Down
barcode2231.txt	0.790826	0.64951	-0.283612	Down		barcode2231.txt	2.01938	0.737907	-1.45116	Down
barcode2232.txt	0.639051	0.349736	-0.867801	Down		barcode2232.txt	0.642091	0.323727	-0.985796	Down
barcode2257.txt	0.299555	0.11991	-1.3137	Down		barcode2257.txt	0.292151	0.176145	-0.726711	Down
barcode2258.txt	0.762868	0.589555	-0.37125	Down		barcode2258.txt	0.757667	0.48559	-0.64076	Down
barcode2259.txt	0.0159763	0	-4.08545	Down		barcode2259.txt	0.166944	0.00952138	-3.99658	Down
barcode2266.txt	1.38594	0.919307	-0.591721	Down		barcode2266.txt	1.89417	0.457026	-2.04882	Down
barcode2274.txt	1.26612	0.969269	-0.385097	Down		barcode2274.txt	1.03056	0.580804	-0.826217	Down
barcode2281.txt	0.119822	0.0999247	-0.259606	Down		barcode2281.txt	0.84756	0.457026	-0.889587	Down
barcode2292.txt	0.487277	0.399699	-0.285181	Down		barcode2292.txt	0.841139	0.457026	-0.878629	Down
barcode232.txt	0.543194	0.449661	-0.272078	Down		barcode232.txt	0.966347	0.752189	-0.361022	Down
barcode2324.txt	0.974553	0.659503	-0.562656	Down		barcode2324.txt	0.882875	0.62365	-0.500794	Down
barcode2326.txt	1.24615	0.829375	-0.586801	Down		barcode2326.txt	1.18466	0.737907	-0.682224	Down
barcode2327.txt	0.463312	0.329751	-0.489348	Down		barcode2327.txt	1.06587	0.609368	-0.805634	Down
barcode2328.txt	0.591123	0.489631	-0.271258	Down		barcode2328.txt	1.03377	0.447505	-1.20611	Down
barcode2330.txt	0.0479289	0	-5.61261	Down		barcode2330.txt	0.150891	0	-7.2469	Down
barcode2342.txt	0.850737	0.68948	-0.302808	Down		barcode2342.txt	0.85077	0.676018	-0.331271	Down
barcode2346.txt	0.0678992	0	-6.10642	Down		barcode2346.txt	0.802614	0.376094	-1.09158	Down
barcode2349.txt	0.423372	0.329751	-0.359581	Down		barcode2349.txt	1.03377	0.861684	-0.2624	Down
barcode2351.txt	0.303549	0	-8.25053	Down		barcode2351.txt	1.13329	0.328487	-1.78349	Down
barcode2354.txt	1.00251	0.759427	-0.400175	Down		barcode2354.txt	1.13008	0.83312	-0.439373	Down
barcode2357.txt	0.734909	0.559578	-0.392612	Down		barcode2357.txt	0.664564	0.261838	-1.3404	Down
barcode2360.txt	0.36346	0.239819	-0.597812	Down		barcode2360.txt	1.05624	0.709342	-0.573716	Down
barcode2376.txt	0.203698	0.129902	-0.645007	Down		barcode2376.txt	0.802614	0.48559	-0.723795	Down
barcode2383.txt	1.36198	0.969269	-0.490306	Down		barcode2383.txt	1.91343	0.928334	-1.04265	Down
barcode2384.txt	0.151775	0.0799397	-0.916486	Down		barcode2384.txt	0.375623	0.242795	-0.627453	Down
barcode2392.txt	0.954583	0.679488	-0.489812	Down		barcode2392.txt	0.809034	0.523676	-0.626558	Down
barcode2402.txt	1.58964	1.22907	-0.370863	Down		barcode2402.txt	1.45434	1.17589	-0.306373	Down
barcode2403.txt	1.58964	1.21908	-0.382631	Down		barcode2403.txt	1.45434	1.17589	-0.306373	Down
barcode2458.txt	0.291567	0.149887	-0.9553	Down		barcode2458.txt	0.616407	0.104735	-2.54577	Down
barcode2460.txt	0.367455	0.169872	-1.10857	Down		barcode2460.txt	0.256836	0.161863	-0.662793	Down
barcode2464.txt	0.475294	0.319759	-0.570365	Down		barcode2464.txt	0.571461	0.352291	-0.696321	Down
barcode2465.txt	0.223668	0.11991	-0.893866	Down		barcode2465.txt	0.301783	0.233274	-0.370088	Down
barcode2470.txt	0.0519229	0	-5.72582	Down		barcode2470.txt	0.394886	0.161863	-1.28142	Down
barcode2471.txt	0.0599111	0	-5.92863	Down		barcode2471.txt	0.616407	0.423701	-0.539774	Down
barcode2480.txt	1.35	1.00924	-0.419327	Down		barcode2480.txt	0.63888	0.437983	-0.543636	Down
barcode2481.txt	0.575146	0.299774	-0.937755	Down		barcode2481.txt	0.63888	0.490351	-0.381049	Down
barcode2491.txt	0.263609	0	-8.04772	Down		barcode2491.txt	0.398096	0.27612	-0.526227	Down
barcode250.txt	0.419377	0.209842	-0.995525	Down		barcode250.txt	1.11082	0.547479	-1.01941	Down
barcode2506.txt	0.487277	0.249812	-0.961095	Down		barcode2506.txt	0.696669	0.399898	-0.799308	Down
barcode2522.txt	0.295561	0.0999247	-1.55505	Down		barcode2522.txt	0.63567	0.104735	-2.59009	Down
barcode2534.txt	0.103846	0.0299774	-1.75898	Down		barcode2534.txt	0.683827	0.266598	-1.35567	Down
barcode255.txt	0.0878696	0.00999247	-3.01517	Down		barcode255.txt	0.260047	0.20471	-0.3437	Down
barcode2550.txt	0.802808	0.489631	-0.712214	Down		barcode2550.txt	0.959926	0.661736	-0.535992	Down
barcode2564.txt	0.355472	0.11991	-1.55986	Down		barcode2564.txt	0.571461	0.342769	-0.735736	Down
barcode2566.txt	0.223668	0	-7.81165	Down		barcode2566.txt	0.340308	0.218992	-0.633626	Down
barcode2567.txt	0.710945	0.399699	-0.829248	Down		barcode2567.txt	1.2906	0.390376	-1.72253	Down
barcode257.txt	0.659022	0.539593	-0.28797	Down		barcode257.txt	0.757667	0.62365	-0.280419	Down
barcode2577.txt	0.663016	0.379714	-0.802511	Down		barcode2577.txt	1.01771	0.514154	-0.983673	Down
barcode2582.txt	1.23417	1.00924	-0.290011	Down		barcode2582.txt	0.902138	0.656975	-0.456913	Down
barcode2585.txt	0.551182	0.279789	-0.975657	Down		barcode2585.txt	0.693458	0.285641	-1.27664	Down
barcode2586.txt	0.0279585	0.00999247	-1.39747	Down		barcode2586.txt	0.558619	0.261838	-1.09027	Down
barcode2592.txt	3.33505	2.67798	-0.316456	Down		barcode2592.txt	3.73055	2.79928	-0.414201	Down
barcode2602.txt	0.523223	0.319759	-0.708692	Down		barcode2602.txt	0.548988	0.228513	-1.26082	Down
barcode2617.txt	0.36346	0.189857	-0.933271	Down		barcode2617.txt	0.979189	0.328487	-1.57284	Down
barcode2619.txt	0.99053	0.559578	-0.822741	Down		barcode2619.txt	1.03056	0.842642	-0.29012	Down
barcode2631.txt	1.43387	1.12915	-0.344409	Down		barcode2631.txt	1.49928	1.24254	-0.270782	Down
barcode2634.txt	2.93964	2.18835	-0.425626	Down		barcode2634.txt	2.32758	1.41868	-0.713879	Down
barcode265.txt	2.57618	1.70871	-0.592038	Down		barcode265.txt	2.456	2.00901	-0.289694	Down
barcode2652.txt	0.886684	0.589555	-0.587973	Down		barcode2652.txt	1.37086	0.476069	-1.52387	Down
barcode2653.txt	0.571152	0.269797	-1.07919	Down		barcode2653.txt	0.687037	0.338009	-1.02116	Down
barcode266.txt	2.57618	1.68873	-0.609001	Down		barcode266.txt	2.39821	2.00901	-0.255356	Down
barcode2665.txt	0.798814	0.539593	-0.565122	Down		barcode2665.txt	1.60202	0.823599	-0.959025	Down
barcode267.txt	2.40044	1.95852	-0.293395	Down		barcode267.txt	2.00653	1.42821	-0.49021	Down
barcode2672.txt	0.698962	0.469646	-0.572636	Down		barcode2672.txt	0.545777	0.328487	-0.73073	Down
barcode2676.txt	0.295561	0.219834	-0.425366	Down		barcode2676.txt	0.536146	0.357052	-0.585147	Down
barcode268.txt	4.13786	2.74793	-0.590364	Down		barcode268.txt	3.78834	2.70407	-0.486279	Down
barcode269.txt	1.77337	1.34898	-0.394364	Down		barcode269.txt	1.48965	0.918813	-0.69653	Down
barcode2693.txt	0.998518	0.819382	-0.284936	Down		barcode2693.txt	1.30023	0.614129	-1.08092	Down
barcode27.txt	1.52574	0.929299	-0.714683	Down		barcode27.txt	1.67586	1.2711	-0.398544	Down
barcode2705.txt	0.0958577	0.0599548	-0.668127	Down		barcode2705.txt	0.417359	0.13806	-1.58903	Down
barcode2707.txt	0.555176	0.399699	-0.473024	Down		barcode2707.txt	0.49441	0.323727	-0.609397	Down
barcode2709.txt	0.671004	0.499623	-0.424744	Down		barcode2709.txt	1.0755	0.514154	-1.06327	Down
barcode2711.txt	0.283579	0.199849	-0.502716	Down		barcode2711.txt	0.969557	0.514154	-0.913809	Down
barcode2717.txt	2.08091	1.57881	-0.398158	Down		barcode2717.txt	1.45113	1.01403	-0.516649	Down
barcode2722.txt	0.92263	0.739442	-0.318928	Down		barcode2722.txt	0.91819	0.537958	-0.770191	Down
barcode2723.txt	1.52574	1.15913	-0.396168	Down		barcode2723.txt	1.70475	1.31395	-0.3754	Down
barcode2731.txt	0.535206	0.369721	-0.532451	Down		barcode2731.txt	0.866823	0.595086	-0.54188	Down
barcode2733.txt	0.327514	0.159879	-1.02997	Down		barcode2733.txt	0.751246	0.380855	-0.97818	Down
barcode274.txt	0.055917	0.0199849	-1.43951	Down		barcode274.txt	0.317835	0.20471	-0.632201	Down
barcode275.txt	0.587128	0.279789	-1.06664	Down		barcode275.txt	1.33234	1.04259	-0.353487	Down
barcode2751.txt	0.00399407	0	-2.32022	Down		barcode2751.txt	0.0931032	0	-6.55617	Down
barcode2756.txt	0.0878696	0.0699473	-0.324942	Down		barcode2756.txt	0.295362	0.119017	-1.30412	Down
barcode2767.txt	0.447336	0.239819	-0.89663	Down		barcode2767.txt	0.584303	0.428462	-0.446653	Down
barcode2768.txt	0.295561	0.189857	-0.635839	Down		barcode2768.txt	0.931032	0.518915	-0.842104	Down
barcode2798.txt	0.0639051	0.00999247	-2.56182	Down		barcode2798.txt	0.237574	0.166624	-0.509205	Down
barcode2802.txt	0.391419	0.139895	-1.47778	Down		barcode2802.txt	0.703089	0.195188	-1.84352	Down
barcode2803.txt	0.255621	0.0499623	-2.33213	Down		barcode2803.txt	0.452674	0.352291	-0.3608	Down
barcode2805.txt	1.12233	0.909314	-0.30335	Down		barcode2805.txt	1.29702	0.380855	-1.76522	Down
barcode2810.txt	0.159763	0.00999247	-3.87035	Down		barcode2810.txt	0.0802614	0.0285641	-1.45872	Down
barcode2813.txt	0.243638	0.11991	-1.01672	Down		barcode2813.txt	0.510462	0.371334	-0.458032	Down
barcode2835.txt	0.355472	0.249812	-0.507186	Down		barcode2835.txt	0.571461	0.257077	-1.14937	Down
barcode2879.txt	1.39792	1.16912	-0.257664	Down		barcode2879.txt	1.60523	1.0902	-0.557764	Down
barcode2906.txt	0.415383	0.339744	-0.289225	Down		barcode2906.txt	0.455885	0.309445	-0.557493	Down
barcode292.txt	0.179733	0.109917	-0.704379	Down		barcode292.txt	0.818666	0.0190428	-5.35388	Down
barcode2939.txt	0.68698	0.339744	-1.01368	Down		barcode2939.txt	0.581092	0.385616	-0.590348	Down
barcode294.txt	0.499259	0.0799397	-2.62776	Down		barcode294.txt	1.12366	0.409419	-1.45432	Down
barcode2945.txt	0.802808	0.64951	-0.30528	Down		barcode2945.txt	1.1044	0.599847	-0.879495	Down
barcode2947.txt	0.483283	0.179864	-1.42094	Down		barcode2947.txt	0.873244	0.499872	-0.803593	Down
barcode2951.txt	0.439348	0.129902	-1.75016	Down		barcode2951.txt	0.523304	0.41894	-0.320219	Down
barcode2954.txt	0.674998	0.469646	-0.522377	Down		barcode2954.txt	0.844349	0.557	-0.599282	Down
barcode2962.txt	0.10784	0.0799397	-0.427288	Down		barcode2962.txt	0.597144	0.41894	-0.510309	Down
barcode2969.txt	0.527217	0.399699	-0.398614	Down		barcode2969.txt	0.767299	0.490351	-0.644914	Down
barcode2972.txt	0.131804	0.109917	-0.25982	Down		barcode2972.txt	0.78014	0.480829	-0.697059	Down
barcode2988.txt	0.974553	0.699473	-0.477892	Down		barcode2988.txt	0.950294	0.728385	-0.383211	Down
barcode299.txt	0.187721	0.11991	-0.642329	Down		barcode299.txt	1.24887	0.376094	-1.72878	Down
barcode2992.txt	0.942601	0.619533	-0.604669	Down		barcode2992.txt	1.32271	0.933095	-0.502943	Down
barcode2993.txt	0.583134	0.339744	-0.777613	Down		barcode2993.txt	0.504041	0.261838	-0.942229	Down
barcode3009.txt	0.183727	0.129902	-0.496909	Down		barcode3009.txt	0.520094	0.285641	-0.862296	Down
barcode3014.txt	2.2926	1.87858	-0.287199	Down		barcode3014.txt	1.18145	0.866445	-0.446931	Down
barcode3018.txt	1.25813	0.829375	-0.600596	Down		barcode3018.txt	1.20392	0.785513	-0.615394	Down
barcode302.txt	0.0519229	0.00999247	-2.26738	Down		barcode302.txt	0.398096	0.161863	-1.29307	Down
barcode3033.txt	1.13831	0.869345	-0.388502	Down		barcode3033.txt	1.35802	0.766471	-0.824385	Down
barcode3036.txt	3.09541	2.30826	-0.423164	Down		barcode3036.txt	3.30677	2.48032	-0.414751	Down
barcode3037.txt	3.27913	2.40818	-0.445209	Down		barcode3037.txt	3.43519	2.48032	-0.469701	Down
barcode3042.txt	0.674998	0.529601	-0.349393	Down		barcode3042.txt	1.14613	0.723624	-0.662726	Down
barcode3047.txt	0.423372	0.239819	-0.817378	Down		barcode3047.txt	0.221521	0.119017	-0.890703	Down
barcode3062.txt	1.30207	1.07919	-0.270631	Down		barcode3062.txt	1.51854	1.05211	-0.528981	Down
barcode3064.txt	0.766862	0.489631	-0.646209	Down		barcode3064.txt	0.898927	0.395137	-1.18381	Down
barcode3071.txt	1.71346	1.31901	-0.377207	Down		barcode3071.txt	1.79464	0.775992	-1.20853	Down
barcode3073.txt	0.607099	0.319759	-0.922816	Down		barcode3073.txt	0.956715	0.756949	-0.337496	Down
barcode3079.txt	0.391419	0.159879	-1.28641	Down		barcode3079.txt	1.00487	0.395137	-1.34438	Down
barcode3081.txt	0.351478	0.0599548	-2.53172	Down		barcode3081.txt	0.719142	0.495111	-0.537617	Down
barcode3087.txt	0.974553	0.639518	-0.606982	Down		barcode3087.txt	1.58275	0.433223	-1.86684	Down
barcode3099.txt	0.435354	0.0299774	-3.81621	Down		barcode3099.txt	0.719142	0.218992	-1.71083	Down
barcode3113.txt	1.22219	0.879337	-0.474516	Down		barcode3113.txt	1.21676	0.528436	-1.2017	Down
barcode3118.txt	0.631063	0.459653	-0.456387	Down		barcode3118.txt	1.37086	1.04735	-0.388015	Down
barcode313.txt	0.191715	0.149887	-0.353004	Down		barcode313.txt	0.712721	0.34753	-1.03408	Down
barcode3135.txt	0.746891	0.589555	-0.340756	Down		barcode3135.txt	0.42057	0.242795	-0.790102	Down
barcode3136.txt	1.13032	0.909314	-0.313573	Down		barcode3136.txt	1.15576	0.756949	-0.609921	Down
barcode3146.txt	1.82529	1.49887	-0.284079	Down		barcode3146.txt	1.55707	0.933095	-0.73812	Down
barcode3147.txt	0.970559	0.64951	-0.57873	Down		barcode3147.txt	1.27134	0.895009	-0.505899	Down
barcode3151.txt	0.12781	0.0999247	-0.351969	Down		barcode3151.txt	0.221521	0.13806	-0.678237	Down
barcode3159.txt	0.942601	0.659503	-0.514612	Down		barcode3159.txt	0.629249	0.48559	-0.373215	Down
barcode3163.txt	1.03446	0.859352	-0.267279	Down		barcode3163.txt	1.12366	0.790274	-0.507238	Down
barcode318.txt	0.359466	0.249812	-0.523261	Down		barcode318.txt	0.876454	0.285641	-1.61408	Down
barcode3180.txt	0.12781	0.0299774	-2.05596	Down		barcode3180.txt	0.401307	0.076171	-2.38217	Down
barcode3186.txt	0.347484	0.219834	-0.658129	Down		barcode3186.txt	0.327466	0.252316	-0.374805	Down
barcode3187.txt	0.0239644	0	-4.6418	Down		barcode3187.txt	0.449464	0.361812	-0.312187	Down
barcode3189.txt	0.575146	0.409691	-0.488381	Down		barcode3189.txt	1.48002	0.942616	-0.650319	Down
barcode3193.txt	0.651034	0.359729	-0.854032	Down		barcode3193.txt	0.600355	0.328487	-0.867993	Down
barcode3195.txt	0.99053	0.739442	-0.421268	Down		barcode3195.txt	1.0145	0.557	-0.863857	Down
barcode3197.txt	0.746891	0.409691	-0.864775	Down		barcode3197.txt	0.760878	0.290402	-1.38655	Down
barcode3198.txt	1.32204	1.09917	-0.266126	Down		barcode3198.txt	1.58596	1.20921	-0.391007	Down
barcode320.txt	0.762868	0.459653	-0.729641	Down		barcode320.txt	0.712721	0.218992	-1.69791	Down
barcode3234.txt	0.854731	0.339744	-1.32847	Down		barcode3234.txt	0.654933	0.252316	-1.37261	Down
barcode3238.txt	1.4818	1.10916	-0.417552	Down		barcode3238.txt	1.14613	0.799795	-0.518526	Down
barcode324.txt	1.71745	1.26904	-0.436231	Down		barcode324.txt	1.53139	0.771231	-0.988675	Down
barcode3245.txt	1.7494	1.4589	-0.261818	Down		barcode3245.txt	1.56991	1.19969	-0.387735	Down
barcode3246.txt	1.32603	0.969269	-0.451746	Down		barcode3246.txt	1.56028	0.914052	-0.770804	Down
barcode3247.txt	1.7534	1.31901	-0.410432	Down		barcode3247.txt	2.69678	1.66148	-0.698437	Down
barcode325.txt	0.914642	0.429676	-1.08818	Down		barcode325.txt	1.26492	0.585565	-1.10982	Down
barcode327.txt	0.718933	0.569571	-0.335457	Down		barcode327.txt	0.998451	0.661736	-0.592703	Down
barcode3276.txt	1.06642	0.64951	-0.71448	Down		barcode3276.txt	1.29702	0.299923	-2.10885	Down
barcode3301.txt	0.754879	0.419684	-0.845421	Down		barcode3301.txt	0.950294	0.48559	-0.967185	Down
barcode331.txt	0.619081	0.209842	-1.5563	Down		barcode331.txt	0.410938	0.176145	-1.21749	Down
barcode3315.txt	0.874702	0.489631	-0.835801	Down		barcode3315.txt	1.17503	0.523676	-1.16442	Down
barcode3335.txt	0.814791	0.669495	-0.282972	Down		barcode3335.txt	0.873244	0.666496	-0.389276	Down
barcode3336.txt	1.2781	0.909314	-0.490695	Down		barcode3336.txt	1.42865	0.509394	-1.48598	Down
barcode3346.txt	2.1568	1.54883	-0.477448	Down		barcode3346.txt	2.4881	1.92808	-0.367714	Down
barcode3348.txt	1.57366	0.84936	-0.888899	Down		barcode3348.txt	1.30344	1.09496	-0.251243	Down
barcode3350.txt	0.77485	0.559578	-0.468862	Down		barcode3350.txt	1.05303	0.771231	-0.44881	Down
barcode3351.txt	0.203698	0.129902	-0.645007	Down		barcode3351.txt	0.362781	0.271359	-0.417561	Down
barcode3352.txt	1.17026	0.979262	-0.256826	Down		barcode3352.txt	2.09643	1.33299	-0.65287	Down
barcode3372.txt	0.587128	0.479638	-0.29118	Down		barcode3372.txt	0.552198	0.461787	-0.257449	Down
barcode3377.txt	0.275591	0.229827	-0.260944	Down		barcode3377.txt	0.362781	0.20471	-0.822463	Down
barcode3385.txt	0.583134	0.409691	-0.508247	Down		barcode3385.txt	1.16861	0.718864	-0.700226	Down
barcode3389.txt	0.682986	0.459653	-0.570285	Down		barcode3389.txt	0.841139	0.656975	-0.356026	Down
barcode3397.txt	0.487277	0.209842	-1.21154	Down		barcode3397.txt	0.809034	0.457026	-0.822554	Down
barcode34.txt	1.24615	0.559578	-1.15365	Down		barcode34.txt	0.654933	0.437983	-0.579382	Down
barcode3407.txt	0.710945	0.549586	-0.370798	Down		barcode3407.txt	0.574671	0.442744	-0.375518	Down
barcode3413.txt	0.183727	0.0999247	-0.872118	Down		barcode3413.txt	0.613197	0.318966	-0.940782	Down
barcode3425.txt	0.754879	0.459653	-0.714474	Down		barcode3425.txt	0.940663	0.633171	-0.570338	Down
barcode3439.txt	0.427366	0.279789	-0.609356	Down		barcode3439.txt	0.500831	0.41894	-0.257016	Down
barcode3441.txt	1.17426	0.939292	-0.321796	Down		barcode3441.txt	1.1975	0.576043	-1.05448	Down
barcode3443.txt	0.271597	0.189857	-0.514278	Down		barcode3443.txt	0.863612	0.666496	-0.373293	Down
barcode3448.txt	0.842749	0.679488	-0.310245	Down		barcode3448.txt	1.02092	0.780753	-0.386504	Down
barcode3460.txt	1.42588	0.939292	-0.601687	Down		barcode3460.txt	1.08513	0.661736	-0.712696	Down
barcode3473.txt	0.423372	0.279789	-0.595841	Down		barcode3473.txt	0.674195	0.333248	-1.01439	Down
barcode3493.txt	1.54571	1.20909	-0.354086	Down		barcode3493.txt	0.873244	0.661736	-0.399602	Down
barcode3495.txt	0.527217	0.329751	-0.675385	Down		barcode3495.txt	0.815455	0.34753	-1.22809	Down
barcode3518.txt	1.22219	1.00924	-0.275947	Down		barcode3518.txt	1.10761	0.604607	-0.872293	Down
barcode3519.txt	1.23017	0.909314	-0.435598	Down		barcode3519.txt	1.43507	1.04259	-0.460573	Down
barcode3558.txt	0.623075	0.379714	-0.713013	Down		barcode3558.txt	0.853981	0.504633	-0.757802	Down
barcode3564.txt	2.03698	1.28903	-0.659735	Down		barcode3564.txt	1.66623	1.3568	-0.296183	Down
barcode3570.txt	0.163757	0.0699473	-1.21552	Down		barcode3570.txt	0.77693	0.509394	-0.60803	Down
barcode3584.txt	0.607099	0.459653	-0.400624	Down		barcode3584.txt	0.664564	0.41894	-0.664393	Down
barcode3587.txt	0.263609	0.189857	-0.47137	Down		barcode3587.txt	0.870033	0.437983	-0.988562	Down
barcode3588.txt	0.00399407	0	-2.32022	Down		barcode3588.txt	0.0963136	0	-6.60457	Down
barcode359.txt	0.463312	0.359729	-0.364181	Down		barcode359.txt	0.526514	0.385616	-0.448311	Down
barcode3621.txt	0.427366	0.209842	-1.02268	Down		barcode3621.txt	0.789772	0.537958	-0.553089	Down
barcode3623.txt	0.730915	0.60954	-0.261589	Down		barcode3623.txt	1.29381	0.809317	-0.676186	Down
barcode3631.txt	1.03846	0.749435	-0.470033	Down		barcode3631.txt	1.85243	1.05687	-0.809033	Down
barcode3632.txt	0.0998518	0.0599548	-0.726425	Down		barcode3632.txt	0.362781	0.114256	-1.65822	Down
barcode3633.txt	0.443342	0.129902	-1.76318	Down		barcode3633.txt	0.853981	0.290402	-1.55288	Down
barcode3634.txt	0.463312	0.319759	-0.533606	Down		barcode3634.txt	0.934242	0.523676	-0.833914	Down
barcode3636.txt	0.722927	0.489631	-0.561206	Down		barcode3636.txt	1.20071	0.775992	-0.629117	Down
barcode3637.txt	0.139792	0.109917	-0.344088	Down		barcode3637.txt	0.513673	0.261838	-0.969482	Down
barcode3638.txt	1.94511	1.17911	-0.721673	Down		barcode3638.txt	1.74649	1.25682	-0.474355	Down
barcode3653.txt	0.203698	0.109917	-0.884012	Down		barcode3653.txt	0.555409	0.0904531	-2.60504	Down
barcode3656.txt	0.68698	0.509616	-0.430129	Down		barcode3656.txt	0.298572	0.20947	-0.509288	Down
barcode3676.txt	0.714939	0.469646	-0.605194	Down		barcode3676.txt	1.37728	0.676018	-1.02561	Down
barcode3686.txt	0.567158	0.409691	-0.468239	Down		barcode3686.txt	0.613197	0.480829	-0.350178	Down
barcode3695.txt	1.35399	0.68948	-0.972611	Down		barcode3695.txt	1.07871	0.642693	-0.746203	Down
barcode370.txt	0.331508	0.229827	-0.526578	Down		barcode370.txt	1.12687	0.571282	-0.978801	Down
barcode3704.txt	0.714939	0.219834	-1.69687	Down		barcode3704.txt	0.754457	0.395137	-0.93135	Down
barcode371.txt	0.519229	0.319759	-0.697658	Down		barcode371.txt	0.786561	0.618889	-0.345381	Down
barcode3724.txt	0.351478	0.209842	-0.741374	Down		barcode3724.txt	0.712721	0.533197	-0.417988	Down
barcode3728.txt	0.347484	0.239819	-0.533143	Down		barcode3728.txt	0.529725	0.390376	-0.439408	Down
barcode375.txt	0.263609	0.109917	-1.25438	Down		barcode375.txt	0.84756	0.171385	-2.29938	Down
barcode3756.txt	0.12781	0.0999247	-0.351969	Down		barcode3756.txt	0.520094	0.252316	-1.0406	Down
barcode3762.txt	1.06642	0.879337	-0.277996	Down		barcode3762.txt	1.72722	1.28062	-0.431316	Down
barcode3765.txt	0.283579	0.229827	-0.302019	Down		barcode3765.txt	0.773719	0.261838	-1.5595	Down
barcode377.txt	0.435354	0.279789	-0.636012	Down		barcode377.txt	0.654933	0.514154	-0.348543	Down
barcode3790.txt	0.21568	0.129902	-0.727077	Down		barcode3790.txt	0.545777	0.318966	-0.773034	Down
barcode3794.txt	0.499259	0.369721	-0.43234	Down		barcode3794.txt	0.42378	0.352291	-0.265859	Down
barcode3797.txt	3.07943	2.40818	-0.354587	Down		barcode3797.txt	2.60047	2.16611	-0.263552	Down
barcode380.txt	0.814791	0.599548	-0.441919	Down		barcode380.txt	1.43186	0.875966	-0.708307	Down
barcode3804.txt	0.694968	0.209842	-1.72286	Down		barcode3804.txt	0.590724	0.290402	-1.02191	Down
barcode3805.txt	0.0599111	0.00999247	-2.47019	Down		barcode3805.txt	0.372413	0.0999744	-1.88678	Down
barcode3809.txt	1.49378	1.14913	-0.378134	Down		barcode3809.txt	2.2409	1.56151	-0.520859	Down
barcode3811.txt	0.66701	0.359729	-0.888955	Down		barcode3811.txt	1.0145	0.656975	-0.626091	Down
barcode3821.txt	0.0878696	0.0599548	-0.54395	Down		barcode3821.txt	0.14126	0.0618889	-1.17765	Down
barcode383.txt	1.08239	0.899322	-0.267044	Down		barcode383.txt	1.09798	0.89977	-0.286928	Down
barcode3830.txt	0.786832	0.479638	-0.712936	Down		barcode3830.txt	1.25208	0.637932	-0.971741	Down
barcode3834.txt	0.447336	0.339744	-0.395893	Down		barcode3834.txt	1.26492	0.685539	-0.882772	Down
barcode3837.txt	0.359466	0.149887	-1.2564	Down		barcode3837.txt	0.696669	0.452265	-0.622186	Down
barcode3844.txt	0.371449	0.309766	-0.261211	Down		barcode3844.txt	0.834718	0.409419	-1.02592	Down
barcode3847.txt	0.0878696	0.0699473	-0.324942	Down		barcode3847.txt	0.956715	0.271359	-1.81409	Down
barcode3849.txt	0.810796	0.629525	-0.364564	Down		barcode3849.txt	1.21034	0.55224	-1.13063	Down
barcode3851.txt	0.790826	0.619533	-0.351676	Down		barcode3851.txt	1.43828	1.02831	-0.483675	Down
barcode3863.txt	1.11035	0.72945	-0.605458	Down		barcode3863.txt	1.38692	1.13304	-0.291444	Down
barcode3883.txt	0.447336	0.369721	-0.274246	Down		barcode3883.txt	0.953505	0.737907	-0.369361	Down
barcode3888.txt	0.467306	0.289782	-0.687517	Down		barcode3888.txt	0.49441	0.399898	-0.305389	Down
barcode3896.txt	0.21568	0.0299774	-2.80628	Down		barcode3896.txt	0.481568	0.0952137	-2.32642	Down
barcode3897.txt	0.714939	0.599548	-0.253557	Down		barcode3897.txt	1.63733	1.28539	-0.348904	Down
barcode3898.txt	0.0279585	0.00999247	-1.39747	Down		barcode3898.txt	0.292151	0.0285641	-3.30973	Down
barcode39.txt	0.443342	0.329751	-0.425923	Down		barcode39.txt	0.870033	0.328487	-1.4025	Down
barcode390.txt	0.535206	0.419684	-0.350051	Down		barcode390.txt	1.06266	0.652214	-0.70341	Down
barcode3909.txt	1.31804	1.04921	-0.328816	Down		barcode3909.txt	1.35802	0.69506	-0.965285	Down
barcode3928.txt	0.43136	0.269797	-0.675023	Down		barcode3928.txt	0.764088	0.404658	-0.91536	Down
barcode3940.txt	0.639051	0.229827	-1.47138	Down		barcode3940.txt	0.754457	0.514154	-0.552345	Down
barcode3942.txt	1.04645	0.509616	-1.03657	Down		barcode3942.txt	1.21355	0.423701	-1.5159	Down
barcode3943.txt	0.0838755	0.0599548	-0.477608	Down		barcode3943.txt	0.378834	0.0666496	-2.48921	Down
barcode3947.txt	0.64704	0.299774	-1.1074	Down		barcode3947.txt	0.539356	0.318966	-0.755992	Down
barcode395.txt	0.0119822	0	-3.69846	Down		barcode395.txt	0.14447	0	-7.18458	Down
barcode3952.txt	1.39393	1.02922	-0.437236	Down		barcode3952.txt	1.2585	0.875966	-0.522255	Down
barcode3957.txt	0.527217	0.269797	-0.963922	Down		barcode3957.txt	0.687037	0.0999744	-2.7685	Down
barcode3958.txt	0.00798814	0	-3.16802	Down		barcode3958.txt	0.272889	0.0571282	-2.23628	Down
barcode3961.txt	0.219674	0.159879	-0.455936	Down		barcode3961.txt	0.49441	0.0380855	-3.66392	Down
barcode3962.txt	0.674998	0.439668	-0.617325	Down		barcode3962.txt	0.609986	0.304684	-0.999099	Down
barcode3965.txt	1.71745	1.26904	-0.436231	Down		barcode3965.txt	1.77859	1.18065	-0.590743	Down
barcode3973.txt	1.83328	1.24906	-0.553218	Down		barcode3973.txt	2.30511	1.70909	-0.431389	Down
barcode3978.txt	0.439348	0.239819	-0.870693	Down		barcode3978.txt	0.388465	0.27612	-0.490983	Down
barcode3979.txt	0.475294	0.329751	-0.526107	Down		barcode3979.txt	0.728773	0.376094	-0.952523	Down
barcode3983.txt	0.239644	0.0299774	-2.95761	Down		barcode3983.txt	0.773719	0.428462	-0.851144	Down
barcode3998.txt	1.32204	0.979262	-0.432615	Down		barcode3998.txt	1.99369	0.97118	-1.03687	Down
barcode4006.txt	0.615087	0.239819	-1.35518	Down		barcode4006.txt	0.292151	0.233274	-0.323451	Down
barcode4015.txt	0.555176	0.409691	-0.437488	Down		barcode4015.txt	1.13008	0.933095	-0.27606	Down
barcode4016.txt	0.866713	0.699473	-0.30889	Down		barcode4016.txt	1.84601	0.933095	-0.983552	Down
barcode4030.txt	0.898666	0.629525	-0.512835	Down		barcode4030.txt	1.08513	0.89977	-0.269971	Down
barcode4038.txt	2.09289	1.47888	-0.500703	Down		barcode4038.txt	2.07395	1.52818	-0.44032	Down
barcode4041.txt	1.03846	0.559578	-0.890845	Down		barcode4041.txt	0.857191	0.495111	-0.790635	Down
barcode4047.txt	0.92263	0.739442	-0.318928	Down		barcode4047.txt	0.998451	0.609368	-0.711457	Down
barcode4052.txt	0.0239644	0	-4.6418	Down		barcode4052.txt	0.154102	0.0428462	-1.82269	Down
barcode4057.txt	0.307543	0.0399699	-2.91284	Down		barcode4057.txt	0.449464	0.0666496	-2.73526	Down
barcode4062.txt	0.455324	0.279789	-0.700572	Down		barcode4062.txt	0.947084	0.238034	-1.9878	Down
barcode4085.txt	0.21568	0.129902	-0.727077	Down		barcode4085.txt	0.449464	0.371334	-0.274815	Down
barcode4093.txt	0.231656	0.0199849	-3.47077	Down		barcode4093.txt	0.385255	0.142821	-1.42528	Down
barcode4094.txt	0.103846	0	-6.71213	Down		barcode4094.txt	0.263257	0.176145	-0.577009	Down
barcode4105.txt	1.01849	0.759427	-0.422963	Down		barcode4105.txt	1.56349	0.55224	-1.49972	Down
barcode4114.txt	0.299555	0.139895	-1.09302	Down		barcode4114.txt	0.619618	0.228513	-1.43513	Down
barcode4116.txt	1.42588	1.14913	-0.311066	Down		barcode4116.txt	1.32271	0.861684	-0.617679	Down
barcode4117.txt	1.13831	0.519608	-1.12989	Down		barcode4117.txt	1.35802	0.699821	-0.955451	Down
barcode4118.txt	0.495265	0.359729	-0.460196	Down		barcode4118.txt	0.571461	0.271359	-1.07167	Down
barcode4120.txt	0.295561	0.229827	-0.36152	Down		barcode4120.txt	0.462305	0.252316	-0.871023	Down
barcode4126.txt	0.746891	0.439668	-0.763135	Down		barcode4126.txt	0.831508	0.547479	-0.602027	Down
barcode4129.txt	0.455324	0.339744	-0.421371	Down		barcode4129.txt	0.584303	0.452265	-0.368827	Down
barcode4142.txt	1.15029	0.789405	-0.542591	Down		barcode4142.txt	0.757667	0.409419	-0.886369	Down
barcode4169.txt	1.12233	0.799397	-0.488999	Down		barcode4169.txt	0.873244	0.704582	-0.309222	Down
barcode4184.txt	0.435354	0.329751	-0.399751	Down		barcode4184.txt	0.632459	0.433223	-0.544818	Down
barcode4189.txt	1.49778	0.999247	-0.58343	Down		barcode4189.txt	1.83638	1.32347	-0.472234	Down
barcode419.txt	0.635057	0.399699	-0.666639	Down		barcode419.txt	0.853981	0.652214	-0.388336	Down
barcode4194.txt	0.635057	0.359729	-0.818242	Down		barcode4194.txt	1.17503	0.742667	-0.661191	Down
barcode4199.txt	0.782838	0.239819	-1.70261	Down		barcode4199.txt	0.866823	0.69506	-0.318188	Down
barcode4200.txt	0.299555	0.0999247	-1.57435	Down		barcode4200.txt	0.548988	0.318966	-0.78148	Down
barcode4205.txt	0.463312	0.199849	-1.20898	Down		barcode4205.txt	0.56504	0.280881	-1.00582	Down
barcode421.txt	0.267603	0.0699473	-1.92066	Down		barcode421.txt	0.85077	0.547479	-0.635028	Down
barcode4218.txt	0.459318	0.279789	-0.713145	Down		barcode4218.txt	0.693458	0.499872	-0.471445	Down
barcode4221.txt	0.663016	0.519608	-0.35102	Down		barcode4221.txt	1.14934	0.604607	-0.925609	Down
barcode423.txt	0.0239644	0	-4.6418	Down		barcode423.txt	0.234363	0	-7.87874	Down
barcode4246.txt	0.487277	0.239819	-1.01975	Down		barcode4246.txt	0.63567	0.433223	-0.552111	Down
barcode425.txt	0.32352	0.229827	-0.491496	Down		barcode425.txt	0.548988	0.390376	-0.490843	Down
barcode4260.txt	0.339496	0.239819	-0.499688	Down		barcode4260.txt	0.577882	0.399898	-0.530034	Down
barcode4271.txt	0.427366	0.109917	-1.94936	Down		barcode4271.txt	0.963136	0.595086	-0.693717	Down
barcode4272.txt	0.287573	0.0499623	-2.50143	Down		barcode4272.txt	0.295362	0.238034	-0.310141	Down
barcode4277.txt	0.958577	0.659503	-0.538834	Down		barcode4277.txt	1.16861	0.885488	-0.399849	Down
barcode4280.txt	0.958577	0.659503	-0.538834	Down		barcode4280.txt	0.873244	0.518915	-0.74976	Down
barcode4285.txt	0.283579	0.139895	-1.01421	Down		barcode4285.txt	0.606776	0.252316	-1.2626	Down
barcode4288.txt	0.367455	0.0499623	-2.85398	Down		barcode4288.txt	0.382044	0.171385	-1.15188	Down
barcode4289.txt	0.391419	0.159879	-1.28641	Down		barcode4289.txt	0.532935	0.423701	-0.330217	Down
barcode4299.txt	1.4818	0.929299	-0.672558	Down		barcode4299.txt	1.5667	1.24254	-0.334199	Down
barcode430.txt	0.4713	0.259804	-0.856738	Down		barcode430.txt	0.683827	0.247556	-1.46217	Down
barcode4309.txt	0.391419	0.209842	-0.896234	Down		barcode4309.txt	1.12687	0.590325	-0.931576	Down
barcode4310.txt	1.05044	0.859352	-0.289368	Down		barcode4310.txt	1.31308	0.928334	-0.499779	Down
barcode4311.txt	1.01449	0.579563	-0.806657	Down		barcode4311.txt	0.661354	0.328487	-1.00738	Down
barcode4326.txt	0.950589	0.779412	-0.286102	Down		barcode4326.txt	0.696669	0.576043	-0.273863	Down
barcode4329.txt	0.43136	0.229827	-0.905422	Down		barcode4329.txt	0.696669	0.585565	-0.250252	Down
barcode433.txt	0.163757	0.0599548	-1.43453	Down		barcode433.txt	0.603565	0.133299	-2.17045	Down
barcode4339.txt	0.714939	0.499623	-0.516111	Down		barcode4339.txt	1.12045	0.480829	-1.21877	Down
barcode436.txt	0.0119822	0	-3.69846	Down		barcode436.txt	0.292151	0.185667	-0.65118	Down
barcode4362.txt	0.491271	0.349736	-0.489065	Down		barcode4362.txt	1.0755	0.199949	-2.42145	Down
barcode437.txt	1.30207	1.01923	-0.353015	Down		barcode437.txt	1.24245	0.847402	-0.551523	Down
barcode4371.txt	0.770856	0.469646	-0.713689	Down		barcode4371.txt	1.04661	0.771231	-0.439994	Down
barcode4384.txt	0.339496	0.269797	-0.330429	Down		barcode4384.txt	0.584303	0.399898	-0.545949	Down
barcode4387.txt	0.335502	0.0799397	-2.0557	Down		barcode4387.txt	0.42378	0.176145	-1.26178	Down
barcode4394.txt	0.32352	0.11991	-1.42438	Down		barcode4394.txt	1.05945	0.666496	-0.667845	Down
barcode4395.txt	0.798814	0.469646	-0.765023	Down		barcode4395.txt	1.14934	0.704582	-0.705179	Down
barcode4413.txt	1.76538	1.17911	-0.581873	Down		barcode4413.txt	2.1799	1.51866	-0.521175	Down
barcode4419.txt	1.0105	0.739442	-0.450037	Down		barcode4419.txt	1.57954	0.771231	-1.03332	Down
barcode4425.txt	0.663016	0.529601	-0.323591	Down		barcode4425.txt	0.741615	0.557	-0.412348	Down
barcode4451.txt	1.44186	0.839367	-0.779839	Down		barcode4451.txt	0.908559	0.685539	-0.405825	Down
barcode4453.txt	0.563164	0.459653	-0.292433	Down		barcode4453.txt	0.715931	0.41418	-0.788099	Down
barcode4469.txt	0.243638	0.0599548	-2.00484	Down		barcode4469.txt	0.654933	0.0714103	-3.17928	Down
barcode4473.txt	0.0639051	0.0399699	-0.66377	Down		barcode4473.txt	0.722352	0.290402	-1.31169	Down
barcode4476.txt	0.207692	0.11991	-0.787445	Down		barcode4476.txt	0.401307	0.323727	-0.30907	Down
barcode4480.txt	0.183727	0.109917	-0.735915	Down		barcode4480.txt	0.520094	0.399898	-0.378308	Down
barcode4502.txt	0.942601	0.559578	-0.751261	Down		barcode4502.txt	1.26492	0.875966	-0.529591	Down
barcode4505.txt	0.43136	0.109917	-1.96275	Down		barcode4505.txt	0.507252	0.271359	-0.900033	Down
barcode4515.txt	1.96508	1.56882	-0.324728	Down		barcode4515.txt	2.97288	1.99949	-0.571994	Down
barcode4520.txt	1.0784	0.869345	-0.31057	Down		barcode4520.txt	1.11082	0.699821	-0.665802	Down
barcode4521.txt	1.09438	0.709465	-0.62459	Down		barcode4521.txt	1.81712	1.26158	-0.526068	Down
barcode4523.txt	0.655028	0.319759	-1.03227	Down		barcode4523.txt	0.687037	0.547479	-0.32705	Down
barcode4527.txt	1.05044	0.749435	-0.486569	Down		barcode4527.txt	0.828297	0.476069	-0.797692	Down
barcode4536.txt	0.55917	0.279789	-0.996378	Down		barcode4536.txt	1.04019	0.823599	-0.336465	Down
barcode4538.txt	0.371449	0.249812	-0.570437	Down		barcode4538.txt	0.661354	0.352291	-0.906745	Down
barcode4539.txt	0.643045	0.539593	-0.252619	Down		barcode4539.txt	0.725563	0.409419	-0.823989	Down
barcode4553.txt	0.147781	0.109917	-0.423705	Down		barcode4553.txt	0.760878	0.380855	-0.996534	Down
barcode4555.txt	1.12633	0.919307	-0.292721	Down		barcode4555.txt	0.825087	0.685539	-0.266952	Down
barcode4567.txt	1.43787	1.16912	-0.298277	Down		barcode4567.txt	1.36444	1.02355	-0.414382	Down
barcode4577.txt	0.854731	0.669495	-0.351931	Down		barcode4577.txt	1.04019	0.599847	-0.793161	Down
barcode4591.txt	1.37396	0.969269	-0.502933	Down		barcode4591.txt	1.08834	0.733146	-0.569321	Down
barcode4593.txt	0.702957	0.539593	-0.380943	Down		barcode4593.txt	0.558619	0.323727	-0.785219	Down
barcode4600.txt	0.459318	0.349736	-0.392245	Down		barcode4600.txt	0.863612	0.6903	-0.322742	Down
barcode4603.txt	0.251626	0.209842	-0.260845	Down		barcode4603.txt	0.462305	0.333248	-0.471044	Down
barcode4604.txt	1.19023	0.749435	-0.666657	Down		barcode4604.txt	0.696669	0.409419	-0.765444	Down
barcode4614.txt	1.00651	0.669495	-0.587489	Down		barcode4614.txt	1.66302	1.17589	-0.499689	Down
barcode4618.txt	0.335502	0.129902	-1.36213	Down		barcode4618.txt	0.337098	0.0476069	-2.79821	Down
barcode4624.txt	0.447336	0.349736	-0.354194	Down		barcode4624.txt	0.792982	0.242795	-1.70344	Down
barcode4627.txt	1.57766	0.949284	-0.732268	Down		barcode4627.txt	0.63888	0.452265	-0.497447	Down
barcode4632.txt	0.690974	0.439668	-0.651025	Down		barcode4632.txt	0.789772	0.518915	-0.604986	Down
barcode4633.txt	0.495265	0.339744	-0.542423	Down		barcode4633.txt	0.468726	0.366573	-0.35379	Down
barcode4634.txt	0.591123	0.399699	-0.563378	Down		barcode4634.txt	0.825087	0.471308	-0.806565	Down
barcode4649.txt	0.527217	0.269797	-0.963922	Down		barcode4649.txt	0.78014	0.252316	-1.62464	Down
barcode4650.txt	0.0439348	0	-5.48976	Down		barcode4650.txt	0.42378	0.0714103	-2.55245	Down
barcode4657.txt	1.33003	1.07919	-0.301258	Down		barcode4657.txt	1.47039	0.809317	-0.86062	Down
barcode4658.txt	1.50177	1.24906	-0.26563	Down		barcode4658.txt	2.38537	1.66624	-0.517354	Down
barcode4660.txt	0.615087	0.399699	-0.620616	Down		barcode4660.txt	0.91819	0.661736	-0.47193	Down
barcode4671.txt	0.591123	0.229827	-1.35909	Down		barcode4671.txt	0.7063	0.504633	-0.484232	Down
barcode4676.txt	0.271597	0.179864	-0.591861	Down		barcode4676.txt	0.526514	0.157103	-1.73835	Down
barcode4685.txt	1.06642	0.589555	-0.853979	Down		barcode4685.txt	1.47039	0.323727	-2.17988	Down
barcode4691.txt	0.4713	0.0499623	-3.2122	Down		barcode4691.txt	0.581092	0.361812	-0.682025	Down
barcode4692.txt	0.263609	0.0299774	-3.09457	Down		barcode4692.txt	0.34994	0.266598	-0.391152	Down
barcode4697.txt	0.255621	0.139895	-0.865021	Down		barcode4697.txt	1.14292	0.20471	-2.47531	Down
barcode47.txt	0.351478	0.129902	-1.42905	Down		barcode47.txt	0.731984	0.395137	-0.887781	Down
barcode4706.txt	1.70547	1.39895	-0.285643	Down		barcode4706.txt	2.00974	1.50914	-0.413049	Down
barcode4721.txt	0.587128	0.479638	-0.29118	Down		barcode4721.txt	0.857191	0.447505	-0.936176	Down
barcode4743.txt	0.347484	0.109917	-1.65161	Down		barcode4743.txt	0.940663	0.495111	-0.924547	Down
barcode4745.txt	1.03047	0.329751	-1.64088	Down		barcode4745.txt	1.13008	0.709342	-0.671114	Down
barcode4746.txt	0.595117	0.409691	-0.537541	Down		barcode4746.txt	0.609986	0.466547	-0.386028	Down
barcode4747.txt	0.826773	0.629525	-0.39268	Down		barcode4747.txt	0.728773	0.571282	-0.350721	Down
barcode476.txt	1.01449	0.80939	-0.325494	Down		barcode476.txt	1.65017	1.26634	-0.381685	Down
barcode4764.txt	0.459318	0.299774	-0.613952	Down		barcode4764.txt	0.362781	0.104735	-1.78262	Down
barcode4779.txt	0.271597	0.149887	-0.8533	Down		barcode4779.txt	1.02092	0.423701	-1.26677	Down
barcode4792.txt	1.66553	1.28903	-0.369443	Down		barcode4792.txt	1.80106	1.18065	-0.608848	Down
barcode4815.txt	0.243638	0.0899322	-1.42779	Down		barcode4815.txt	0.439832	0.152342	-1.52348	Down
barcode4830.txt	1.60162	1.12915	-0.503922	Down		barcode4830.txt	2.19595	1.68528	-0.381656	Down
barcode4832.txt	1.60961	1.13914	-0.498395	Down		barcode4832.txt	2.273	1.69004	-0.427319	Down
barcode4855.txt	0.335502	0.209842	-0.674454	Down		barcode4855.txt	1.18466	0.895009	-0.404102	Down
barcode4868.txt	0.151775	0.0799397	-0.916486	Down		barcode4868.txt	0.327466	0.271359	-0.270235	Down
barcode4873.txt	0.547188	0.309766	-0.818839	Down		barcode4873.txt	0.536146	0.41894	-0.355129	Down
barcode4883.txt	0.255621	0.0399699	-2.647	Down		barcode4883.txt	0.786561	0.442744	-0.827665	Down
barcode4884.txt	0.319526	0.219834	-0.537476	Down		barcode4884.txt	0.462305	0.34753	-0.41068	Down
barcode489.txt	0.603105	0.389706	-0.628715	Down		barcode489.txt	1.02092	0.366573	-1.47519	Down
barcode4901.txt	0.726921	0.529601	-0.456155	Down		barcode4901.txt	0.735194	0.27612	-1.40958	Down
barcode4911.txt	1.40192	1.00924	-0.473735	Down		barcode4911.txt	1.42223	0.69506	-1.03189	Down
barcode4929.txt	0.503253	0.319759	-0.652658	Down		barcode4929.txt	0.520094	0.271359	-0.936032	Down
barcode4932.txt	0.77485	0.459653	-0.752096	Down		barcode4932.txt	1.44149	0.780753	-0.883781	Down
barcode4937.txt	0.227662	0.0999247	-1.17994	Down		barcode4937.txt	0.433411	0.271359	-0.673551	Down
barcode4938.txt	0.303549	0.129902	-1.21819	Down		barcode4938.txt	0.516883	0.390376	-0.40407	Down
barcode4941.txt	0.730915	0.449661	-0.699634	Down		barcode4941.txt	0.401307	0.20471	-0.967687	Down
barcode4942.txt	0.359466	0.219834	-0.706901	Down		barcode4942.txt	1.14292	0.856924	-0.415067	Down
barcode4972.txt	0.850737	0.699473	-0.28208	Down		barcode4972.txt	1.2585	0.861684	-0.545944	Down
barcode4993.txt	0.487277	0.399699	-0.285181	Down		barcode4993.txt	1.10761	0.628411	-0.816674	Down
barcode5029.txt	1.22219	0.929299	-0.394877	Down		barcode5029.txt	1.36765	1.08544	-0.333153	Down
barcode5035.txt	0.587128	0.449661	-0.384089	Down		barcode5035.txt	0.487989	0.304684	-0.677761	Down
barcode5048.txt	0.119822	0.0999247	-0.259606	Down		barcode5048.txt	0.510462	0.247556	-1.04106	Down
barcode5050.txt	0.531211	0.379714	-0.483293	Down		barcode5050.txt	0.902138	0.566522	-0.67027	Down
barcode5062.txt	0.547188	0.349736	-0.644283	Down		barcode5062.txt	1.05945	0.747428	-0.502741	Down
barcode5064.txt	1.00651	0.629525	-0.676162	Down		barcode5064.txt	1.06266	0.537958	-0.980794	Down
barcode5068.txt	1.12633	0.749435	-0.587109	Down		barcode5068.txt	0.998451	0.561761	-0.828614	Down
barcode508.txt	0.595117	0.489631	-0.280957	Down		barcode508.txt	0.667774	0.509394	-0.38991	Down
barcode5093.txt	0.0519229	0.0399699	-0.36933	Down		barcode5093.txt	0.382044	0.147581	-1.36626	Down
barcode5097.txt	0.375443	0.269797	-0.475221	Down		barcode5097.txt	1.20071	0.338009	-1.82569	Down
barcode5100.txt	0.718933	0.449661	-0.67582	Down		barcode5100.txt	0.664564	0.0952137	-2.79026	Down
barcode5101.txt	0.279585	0.0799397	-1.79352	Down		barcode5101.txt	0.789772	0.442744	-0.833534	Down
barcode5104.txt	0.619081	0.359729	-0.781542	Down		barcode5104.txt	0.478358	0.104735	-2.18065	Down
barcode5106.txt	0.770856	0.449661	-0.776289	Down		barcode5106.txt	0.927821	0.561761	-0.722878	Down
barcode511.txt	0.778844	0.589555	-0.401113	Down		barcode511.txt	0.863612	0.699821	-0.303007	Down
barcode5157.txt	0.519229	0.379714	-0.450441	Down		barcode5157.txt	0.7063	0.352291	-1.00147	Down
barcode5199.txt	0.479289	0.399699	-0.261384	Down		barcode5199.txt	0.645301	0.457026	-0.496777	Down
barcode5201.txt	0.0359466	0.0299774	-0.254227	Down		barcode5201.txt	0.385255	0.119017	-1.68631	Down
barcode5202.txt	0.555176	0.219834	-1.33258	Down		barcode5202.txt	0.654933	0.323727	-1.01432	Down
barcode5215.txt	0.463312	0.189857	-1.2826	Down		barcode5215.txt	0.927821	0.376094	-1.30048	Down
barcode5222.txt	0.291567	0.239819	-0.280818	Down		barcode5222.txt	0.49762	0.20947	-1.24433	Down
barcode5232.txt	0.858725	0.479638	-0.838924	Down		barcode5232.txt	1.08192	0.737907	-0.551467	Down
barcode5234.txt	1.4139	0.799397	-0.821913	Down		barcode5234.txt	1.34839	0.895009	-0.590723	Down
barcode5246.txt	0.734909	0.379714	-0.950821	Down		barcode5246.txt	0.969557	0.514154	-0.913809	Down
barcode5250.txt	2.8318	2.27828	-0.313647	Down		barcode5250.txt	4.18643	2.71359	-0.625331	Down
barcode5259.txt	0.00399407	0	-2.32022	Down		barcode5259.txt	0.00321045	0	-2.07398	Down
barcode526.txt	0.57914	0.479638	-0.27145	Down		barcode526.txt	0.837929	0.457026	-0.873119	Down
barcode5268.txt	0.439348	0.179864	-1.28374	Down		barcode5268.txt	0.529725	0.437983	-0.273799	Down
barcode5274.txt	1.22618	1.01923	-0.26645	Down		barcode5274.txt	0.812245	0.528436	-0.619233	Down
barcode5277.txt	0.231656	0.11991	-0.944271	Down		barcode5277.txt	0.465516	0.20947	-1.14831	Down
barcode5278.txt	0.754879	0.529601	-0.51053	Down		barcode5278.txt	0.532935	0.404658	-0.3964	Down
barcode5280.txt	0.339496	0.229827	-0.560828	Down		barcode5280.txt	0.372413	0.295163	-0.334381	Down
barcode5291.txt	0.0279585	0	-4.85591	Down		barcode5291.txt	0.186206	0.128539	-0.531248	Down
barcode5292.txt	0.0798814	0.0599548	-0.408069	Down		barcode5292.txt	0.301783	0.0571282	-2.38097	Down
barcode5293.txt	0.43136	0.229827	-0.905422	Down		barcode5293.txt	0.324256	0.190427	-0.764777	Down
barcode5299.txt	1.11834	0.84936	-0.396503	Down		barcode5299.txt	1.11724	0.837881	-0.414689	Down
barcode5305.txt	0.387425	0.239819	-0.689685	Down		barcode5305.txt	0.186206	0.119017	-0.641388	Down
barcode5315.txt	0.551182	0.419684	-0.392408	Down		barcode5315.txt	1.05945	0.537958	-0.976433	Down
barcode5317.txt	0.627069	0.499623	-0.327198	Down		barcode5317.txt	0.542567	0.428462	-0.339927	Down
barcode5318.txt	0.243638	0.00999247	-4.47606	Down		barcode5318.txt	0.873244	0.271359	-1.68252	Down
barcode5339.txt	0.139792	0.0599548	-1.20776	Down		barcode5339.txt	0.452674	0.190427	-1.24486	Down
barcode5348.txt	0.954583	0.549586	-0.795414	Down		barcode5348.txt	1.49928	0.952137	-0.654478	Down
barcode5359.txt	0.563164	0.449661	-0.324072	Down		barcode5359.txt	0.654933	0.523676	-0.322122	Down
barcode5360.txt	1.1423	0.679488	-0.748569	Down		barcode5360.txt	1.47681	1.03783	-0.5085	Down
barcode5361.txt	0.499259	0.389706	-0.356591	Down		barcode5361.txt	1.30987	0.576043	-1.18377	Down
barcode5364.txt	1.08639	0.619533	-0.809286	Down		barcode5364.txt	1.39655	0.952137	-0.552141	Down
barcode5367.txt	0.655028	0.359729	-0.862842	Down		barcode5367.txt	1.67586	0.590325	-1.50374	Down
barcode5386.txt	1.66153	1.03922	-0.6765	Down		barcode5386.txt	2.01295	0.937855	-1.10106	Down
barcode5391.txt	0.886684	0.619533	-0.516538	Down		barcode5391.txt	1.10119	0.809317	-0.443809	Down
barcode5406.txt	0.283579	0.179864	-0.653921	Down		barcode5406.txt	0.468726	0.233274	-1.00363	Down
barcode5414.txt	1.00651	0.739442	-0.444329	Down		barcode5414.txt	1.19429	0.866445	-0.462515	Down
barcode5419.txt	0.0878696	0.0499623	-0.802258	Down		barcode5419.txt	1.71438	0.376094	-2.18553	Down
barcode5422.txt	1.36597	0.819382	-0.736616	Down		barcode5422.txt	1.55386	0.790274	-0.974535	Down
barcode5424.txt	0.0359466	0	-5.20737	Down		barcode5424.txt	0.401307	0.0999744	-1.99431	Down
barcode5427.txt	0.371449	0.169872	-1.12413	Down		barcode5427.txt	0.298572	0.0856924	-1.78893	Down
barcode5439.txt	0.21568	0.149887	-0.522097	Down		barcode5439.txt	0.622828	0.342769	-0.859707	Down
barcode5455.txt	1.56568	1.29902	-0.269172	Down		barcode5455.txt	2.23127	1.39488	-0.677332	Down
barcode546.txt	1.25414	0.839367	-0.578755	Down		barcode546.txt	1.70154	1.38536	-0.296387	Down
barcode5465.txt	1.10236	0.619533	-0.830329	Down		barcode5465.txt	0.937453	0.666496	-0.491524	Down
barcode5479.txt	0.307543	0.199849	-0.61936	Down		barcode5479.txt	0.243995	0.180906	-0.429555	Down
barcode5506.txt	1.72144	0.709465	-1.27762	Down		barcode5506.txt	0.513673	0.395137	-0.377656	Down
barcode5520.txt	0.858725	0.629525	-0.447321	Down		barcode5520.txt	1.49286	1.11876	-0.415855	Down
barcode5527.txt	0.271597	0.209842	-0.370608	Down		barcode5527.txt	1.17182	0.614129	-0.931016	Down
barcode5530.txt	1.80931	0.999247	-0.855884	Down		barcode5530.txt	0.725563	0.595086	-0.285567	Down
barcode5531.txt	0.583134	0.489631	-0.251662	Down		barcode5531.txt	0.703089	0.537958	-0.385587	Down
barcode5548.txt	0.531211	0.229827	-1.20519	Down		barcode5548.txt	0.731984	0.376094	-0.958856	Down
barcode5557.txt	0.195709	0.139895	-0.481451	Down		barcode5557.txt	0.63888	0.423701	-0.591354	Down
barcode5563.txt	0.802808	0.489631	-0.712214	Down		barcode5563.txt	1.01771	0.680778	-0.579375	Down
barcode5572.txt	0.878696	0.529601	-0.729378	Down		barcode5572.txt	0.99203	0.804556	-0.301853	Down
barcode5578.txt	0.239644	0.199849	-0.260789	Down		barcode5578.txt	0.985609	0.76171	-0.371345	Down
barcode5593.txt	0.163757	0.109917	-0.570857	Down		barcode5593.txt	0.250415	0.119017	-1.06683	Down
barcode5602.txt	1.67751	1.26904	-0.402304	Down		barcode5602.txt	1.58596	1.21874	-0.379701	Down
barcode5603.txt	0.978547	0.579563	-0.754663	Down		barcode5603.txt	0.687037	0.504633	-0.444396	Down
barcode5605.txt	0.0159763	0	-4.08545	Down		barcode5605.txt	0.0898927	0.0380855	-1.21753	Down
barcode5607.txt	0.842749	0.579563	-0.539361	Down		barcode5607.txt	0.539356	0.371334	-0.537315	Down
barcode5631.txt	0.491271	0.289782	-0.759517	Down		barcode5631.txt	1.36123	0.852163	-0.67508	Down
barcode5633.txt	0.0159763	0	-4.08545	Down		barcode5633.txt	0.770509	0.0999744	-2.93369	Down
barcode564.txt	0.339496	0.159879	-1.08166	Down		barcode564.txt	1.30665	0.195188	-2.73667	Down
barcode5640.txt	0.786832	0.519608	-0.59769	Down		barcode5640.txt	0.680616	0.314205	-1.11267	Down
barcode5641.txt	0.950589	0.629525	-0.593784	Down		barcode5641.txt	1.12366	0.471308	-1.25169	Down
barcode5642.txt	1.09038	0.84936	-0.36001	Down		barcode5642.txt	0.892506	0.652214	-0.451922	Down
barcode565.txt	0.682986	0.509616	-0.421729	Down		barcode565.txt	1.01771	0.604607	-0.750295	Down
barcode5664.txt	0.690974	0.539593	-0.356175	Down		barcode5664.txt	0.452674	0.27612	-0.711146	Down
barcode5696.txt	0.55917	0.409691	-0.447811	Down		barcode5696.txt	1.11082	0.442744	-1.32512	Down
barcode5699.txt	0.575146	0.409691	-0.488381	Down		barcode5699.txt	0.959926	0.476069	-1.01023	Down
barcode5711.txt	0.395413	0.309766	-0.351174	Down		barcode5711.txt	0.481568	0.318966	-0.592814	Down
barcode5712.txt	0.355472	0.239819	-0.56584	Down		barcode5712.txt	0.308204	0.214231	-0.522672	Down
barcode572.txt	0.00798814	0	-3.16802	Down		barcode572.txt	0.0802614	0	-6.3445	Down
barcode5730.txt	0.555176	0.459653	-0.271859	Down		barcode5730.txt	0.786561	0.41418	-0.923656	Down
barcode5734.txt	0.123816	0.0799397	-0.624885	Down		barcode5734.txt	0.324256	0.271359	-0.256065	Down
barcode5735.txt	0.0319526	0.0199849	-0.651037	Down		barcode5735.txt	0.410938	0.0428462	-3.2319	Down
barcode5761.txt	0.635057	0.459653	-0.465475	Down		barcode5761.txt	0.725563	0.533197	-0.443715	Down
barcode5773.txt	1.28609	0.629525	-1.02949	Down		barcode5773.txt	1.5667	0.69506	-1.17137	Down
barcode5794.txt	0.495265	0.179864	-1.4562	Down		barcode5794.txt	1.04661	0.55224	-0.921122	Down
barcode5796.txt	3.01153	2.23831	-0.42792	Down		barcode5796.txt	2.13816	1.40916	-0.601184	Down
barcode5797.txt	3.04348	2.23831	-0.443141	Down		barcode5797.txt	2.28584	1.42821	-0.678144	Down
barcode5832.txt	1.73343	1.38895	-0.319423	Down		barcode5832.txt	1.91022	1.32823	-0.523901	Down
barcode5838.txt	0.90266	0.669495	-0.430553	Down		barcode5838.txt	1.30665	0.618889	-1.0769	Down
barcode10224.txt	0.830767	0.64951	-0.354607	Down		barcode10224.txt	1.0755	0.637932	-0.752617	Down
barcode584.txt	0.187721	0.00999247	-4.10167	Down		barcode584.txt	0.369202	0.185667	-0.987848	Down
barcode5842.txt	0.367455	0.189857	-0.948996	Down		barcode5842.txt	0.661354	0.395137	-0.741602	Down
barcode5843.txt	0.611093	0.459653	-0.410069	Down		barcode5843.txt	0.78014	0.452265	-0.785226	Down
barcode5858.txt	0.4713	0.179864	-1.3848	Down		barcode5858.txt	0.911769	0.318966	-1.51233	Down
barcode5860.txt	1.49378	0.789405	-0.919272	Down		barcode5860.txt	0.998451	0.809317	-0.30265	Down
barcode5861.txt	0.511241	0.379714	-0.428117	Down		barcode5861.txt	1.36123	0.318966	-2.08998	Down
barcode5863.txt	0.447336	0.359729	-0.313666	Down		barcode5863.txt	0.812245	0.566522	-0.519014	Down
barcode5865.txt	1.0784	0.589555	-0.870084	Down		barcode5865.txt	0.516883	0.380855	-0.439602	Down
barcode5871.txt	0.0479289	0.0299774	-0.65947	Down		barcode5871.txt	0.385255	0.214231	-0.843666	Down
barcode5874.txt	0.68698	0.559578	-0.295452	Down		barcode5874.txt	1.06587	0.656975	-0.697281	Down
barcode5876.txt	0.706951	0.499623	-0.499923	Down		barcode5876.txt	0.953505	0.771231	-0.305719	Down
barcode5882.txt	0.878696	0.639518	-0.457766	Down		barcode5882.txt	0.91819	0.718864	-0.352639	Down
barcode5899.txt	0.742897	0.559578	-0.408188	Down		barcode5899.txt	0.870033	0.461787	-0.91238	Down
barcode5907.txt	0.507247	0.419684	-0.272794	Down		barcode5907.txt	1.03377	0.528436	-0.966776	Down
barcode5913.txt	0.702957	0.439668	-0.675793	Down		barcode5913.txt	1.08834	0.723624	-0.588154	Down
barcode5917.txt	0.706951	0.529601	-0.416022	Down		barcode5917.txt	0.529725	0.166624	-1.66274	Down
barcode5918.txt	0.447336	0.369721	-0.274246	Down		barcode5918.txt	1.04982	0.452265	-1.21309	Down
barcode5919.txt	0.0159763	0	-4.08545	Down		barcode5919.txt	0.237574	0.0618889	-1.92356	Down
barcode5931.txt	1.64156	1.37896	-0.251322	Down		barcode5931.txt	1.96801	1.35204	-0.54127	Down
barcode5939.txt	1.27011	0.749435	-0.760295	Down		barcode5939.txt	2.14137	1.41392	-0.598485	Down
barcode5941.txt	1.26612	0.719458	-0.814569	Down		barcode5941.txt	1.97764	1.41868	-0.478938	Down
barcode5944.txt	2.79585	2.2583	-0.307929	Down		barcode5944.txt	3.06919	1.92332	-0.673983	Down
barcode5945.txt	0.315532	0.199849	-0.656236	Down		barcode5945.txt	0.629249	0.48559	-0.373215	Down
barcode5967.txt	1.71346	1.33899	-0.355529	Down		barcode5967.txt	1.64696	0.961659	-0.775587	Down
barcode5969.txt	1.80931	1.21908	-0.569263	Down		barcode5969.txt	1.52176	0.937855	-0.697709	Down
barcode5981.txt	1.47781	1.21908	-0.277456	Down		barcode5981.txt	1.67265	0.890249	-0.909095	Down
barcode5985.txt	0.886684	0.489631	-0.855408	Down		barcode5985.txt	0.783351	0.328487	-1.25128	Down
barcode5995.txt	0.203698	0.139895	-0.538879	Down		barcode5995.txt	0.632459	0.333248	-0.922333	Down
barcode6014.txt	0.195709	0.0399699	-2.26343	Down		barcode6014.txt	0.703089	0.20947	-1.74214	Down
barcode6017.txt	0.123816	0.0699473	-0.814986	Down		barcode6017.txt	0.536146	0.0428462	-3.61479	Down
barcode6030.txt	0.339496	0.0499623	-2.74013	Down		barcode6030.txt	0.487989	0.147581	-1.71855	Down
barcode6033.txt	0.239644	0.0799397	-1.57198	Down		barcode6033.txt	0.539356	0.171385	-1.64828	Down
barcode6070.txt	0.507247	0.159879	-1.65955	Down		barcode6070.txt	0.879664	0.437983	-1.00443	Down
barcode6078.txt	0.23565	0.0599548	-1.95694	Down		barcode6078.txt	0.35636	0.228513	-0.638804	Down
barcode6089.txt	1.09038	0.899322	-0.277643	Down		barcode6089.txt	1.07229	0.742667	-0.529313	Down
barcode6096.txt	0.5392	0.319759	-0.752003	Down		barcode6096.txt	1.21997	0.599847	-1.02296	Down
barcode61.txt	0.275591	0	-8.11161	Down		barcode61.txt	0.398096	0.252316	-0.655796	Down
barcode6100.txt	0.635057	0.469646	-0.434515	Down		barcode6100.txt	1.29702	0.537958	-1.26807	Down
barcode6108.txt	1.76538	1.01923	-0.791899	Down		barcode6108.txt	1.53781	0.880727	-0.803409	Down
barcode6132.txt	0.838755	0.589555	-0.507896	Down		barcode6132.txt	0.902138	0.699821	-0.3659	Down
barcode6139.txt	0.435354	0.299774	-0.536819	Down		barcode6139.txt	0.748036	0.447505	-0.739912	Down
barcode614.txt	0.766862	0.619533	-0.307339	Down		barcode614.txt	0.959926	0.666496	-0.525665	Down
barcode6147.txt	0.0958577	0.0499623	-0.926436	Down		barcode6147.txt	0.2151	0.119017	-0.848461	Down
barcode6148.txt	0.375443	0.289782	-0.372495	Down		barcode6148.txt	1.01771	0.528436	-0.94422	Down
barcode6151.txt	1.78535	1.39895	-0.351644	Down		barcode6151.txt	2.68073	1.75669	-0.60948	Down
barcode6155.txt	0.415383	0.289782	-0.517977	Down		barcode6155.txt	0.703089	0.490351	-0.519005	Down
barcode617.txt	1.25813	0.779412	-0.690122	Down		barcode617.txt	1.67586	1.2711	-0.398544	Down
barcode6182.txt	1.74541	1.30901	-0.41481	Down		barcode6182.txt	2.13495	1.7805	-0.261789	Down
barcode6188.txt	1.36597	1.08918	-0.326419	Down		barcode6188.txt	1.1975	0.937855	-0.352254	Down
barcode6199.txt	0.587128	0.329751	-0.830384	Down		barcode6199.txt	0.950294	0.466547	-1.02478	Down
barcode62.txt	0.583134	0.339744	-0.777613	Down		barcode62.txt	0.645301	0.285641	-1.17296	Down
barcode6207.txt	0.587128	0.319759	-0.874642	Down		barcode6207.txt	0.898927	0.233274	-1.94161	Down
barcode6215.txt	1.03446	0.84936	-0.284133	Down		barcode6215.txt	1.68549	0.714103	-1.2378	Down
barcode6224.txt	0.411389	0.129902	-1.65552	Down		barcode6224.txt	0.452674	0.357052	-0.341489	Down
barcode6239.txt	0.0918636	0.0299774	-1.5839	Down		barcode6239.txt	0.375623	0.0380855	-3.26842	Down
barcode6255.txt	0.710945	0.329751	-1.10602	Down		barcode6255.txt	1.04661	0.395137	-1.40303	Down
barcode6271.txt	0.263609	0.159879	-0.71788	Down		barcode6271.txt	0.632459	0.509394	-0.311642	Down
barcode6276.txt	0.279585	0.189857	-0.555947	Down		barcode6276.txt	0.600355	0.171385	-1.80258	Down
barcode6298.txt	0.263609	0.159879	-0.71788	Down		barcode6298.txt	0.873244	0.41894	-1.05785	Down
barcode6301.txt	0.659022	0.479638	-0.457562	Down		barcode6301.txt	1.20071	0.97118	-0.305793	Down
barcode6310.txt	1.63358	1.16912	-0.482261	Down		barcode6310.txt	1.95838	1.5139	-0.371174	Down
barcode6312.txt	0.275591	0.179864	-0.612845	Down		barcode6312.txt	1.07229	0.652214	-0.716414	Down
barcode632.txt	0.798814	0.289782	-1.45973	Down		barcode632.txt	0.516883	0.34753	-0.571343	Down
barcode6326.txt	0.798814	0.349736	-1.18928	Down		barcode6326.txt	1.82996	0.461787	-1.98418	Down
barcode6334.txt	0.427366	0.219834	-0.955879	Down		barcode6334.txt	0.619618	0.280881	-1.13862	Down
barcode6340.txt	0.99053	0.659503	-0.586091	Down		barcode6340.txt	1.32271	0.942616	-0.488312	Down
barcode6346.txt	0.690974	0.539593	-0.356175	Down		barcode6346.txt	0.905348	0.661736	-0.451632	Down
barcode6347.txt	1.09837	0.739442	-0.570217	Down		barcode6347.txt	0.979189	0.756949	-0.370958	Down
barcode6371.txt	0.491271	0.289782	-0.759517	Down		barcode6371.txt	0.866823	0.471308	-0.877672	Down
barcode6396.txt	0.595117	0.229827	-1.36878	Down		barcode6396.txt	0.683827	0.514154	-0.410735	Down
barcode6401.txt	1.56568	1.28903	-0.280304	Down		barcode6401.txt	1.93911	1.53294	-0.338898	Down
barcode6405.txt	1.6855	1.15913	-0.539749	Down		barcode6405.txt	2.19595	1.37108	-0.67914	Down
barcode6418.txt	1.33003	0.999247	-0.412183	Down		barcode6418.txt	1.77538	1.40916	-0.333079	Down
barcode6423.txt	0.750885	0.249812	-1.58391	Down		barcode6423.txt	1.48323	0.452265	-1.71129	Down
barcode6430.txt	0.291567	0.219834	-0.405804	Down		barcode6430.txt	0.63567	0.338009	-0.909223	Down
barcode6432.txt	1.03446	0.639518	-0.692967	Down		barcode6432.txt	0.975978	0.680778	-0.519024	Down
barcode6450.txt	0.499259	0.249812	-0.996071	Down		barcode6450.txt	0.157312	0.0856924	-0.868796	Down
barcode6452.txt	0.826773	0.639518	-0.369996	Down		barcode6452.txt	0.821876	0.528436	-0.636218	Down
barcode6454.txt	0.643045	0.509616	-0.334924	Down		barcode6454.txt	0.770509	0.461787	-0.737336	Down
barcode6471.txt	0.914642	0.589555	-0.632712	Down		barcode6471.txt	1.23281	0.790274	-0.640876	Down
barcode6475.txt	1.01849	0.779412	-0.385537	Down		barcode6475.txt	0.889296	0.518915	-0.776009	Down
barcode6486.txt	0.487277	0.289782	-0.747763	Down		barcode6486.txt	1.13329	0.576043	-0.975039	Down
barcode6504.txt	1.17825	0.929299	-0.342104	Down		barcode6504.txt	1.83638	0.756949	-1.27748	Down
barcode6519.txt	1.29408	1.01923	-0.344144	Down		barcode6519.txt	1.75933	1.19017	-0.563463	Down
barcode6520.txt	0.68698	0.539593	-0.347824	Down		barcode6520.txt	0.738404	0.499872	-0.561921	Down
barcode6557.txt	0.423372	0.279789	-0.595841	Down		barcode6557.txt	0.857191	0.637932	-0.425637	Down
barcode6582.txt	0.243638	0.109917	-1.14117	Down		barcode6582.txt	0.889296	0.171385	-2.36865	Down
barcode6584.txt	1.20222	0.919307	-0.386708	Down		barcode6584.txt	1.39013	1.03307	-0.427921	Down
barcode6585.txt	0.483283	0.289782	-0.735914	Down		barcode6585.txt	0.520094	0.41894	-0.311358	Down
barcode659.txt	0.227662	0.179864	-0.338309	Down		barcode659.txt	0.375623	0.171385	-1.12749	Down
barcode6591.txt	0.690974	0.519608	-0.41052	Down		barcode6591.txt	0.911769	0.318966	-1.51233	Down
barcode6592.txt	0.682986	0.299774	-1.18529	Down		barcode6592.txt	0.818666	0.409419	-0.997938	Down
barcode6609.txt	0.718933	0.519608	-0.467664	Down		barcode6609.txt	0.789772	0.290402	-1.44025	Down
barcode6612.txt	0.155769	0.0799397	-0.953718	Down		barcode6612.txt	0.520094	0.119017	-2.1183	Down
barcode6613.txt	0.0359466	0	-5.20737	Down		barcode6613.txt	0.260047	0.0809317	-1.67182	Down
barcode662.txt	0.355472	0.289782	-0.293855	Down		barcode662.txt	0.767299	0.27612	-1.47116	Down
barcode6622.txt	0.243638	0.0599548	-2.00484	Down		barcode6622.txt	0.410938	0.109496	-1.89844	Down
barcode6623.txt	0.587128	0.439668	-0.416438	Down		barcode6623.txt	0.436622	0.20471	-1.08908	Down
barcode6630.txt	0.0319526	0.0199849	-0.651037	Down		barcode6630.txt	0.240784	0.109496	-1.12973	Down
barcode6646.txt	0.822779	0.599548	-0.455977	Down		barcode6646.txt	0.764088	0.466547	-0.710513	Down
barcode6671.txt	0.746891	0.439668	-0.763135	Down		barcode6671.txt	0.882875	0.680778	-0.37454	Down
barcode6682.txt	0.966565	0.759427	-0.347548	Down		barcode6682.txt	2.31795	0.937855	-1.3045	Down
barcode6702.txt	0.0918636	0.0599548	-0.607374	Down		barcode6702.txt	0.715931	0.161863	-2.13817	Down
barcode6707.txt	0.383431	0.299774	-0.354044	Down		barcode6707.txt	0.600355	0.34753	-0.786933	Down
barcode6726.txt	0.66701	0.509616	-0.387631	Down		barcode6726.txt	1.27776	0.69506	-0.877462	Down
barcode6737.txt	0.706951	0.459653	-0.619967	Down		barcode6737.txt	1.37728	0.447505	-1.61968	Down
barcode6743.txt	0.958577	0.669495	-0.517172	Down		barcode6743.txt	1.67907	0.471308	-1.83072	Down
barcode676.txt	0.90266	0.699473	-0.367452	Down		barcode676.txt	1.07229	0.771231	-0.474937	Down
barcode6764.txt	1.03446	0.84936	-0.284133	Down		barcode6764.txt	0.853981	0.547479	-0.640456	Down
barcode6774.txt	0.239644	0.0999247	-1.25362	Down		barcode6774.txt	0.937453	0.247556	-1.91671	Down
barcode6783.txt	0.223668	0.109917	-1.01831	Down		barcode6783.txt	0.478358	0.171385	-1.47547	Down
barcode6803.txt	0.730915	0.479638	-0.606724	Down		barcode6803.txt	0.504041	0.180906	-1.47321	Down
barcode6804.txt	0.918636	0.539593	-0.76652	Down		barcode6804.txt	1.03377	0.804556	-0.361248	Down
barcode6812.txt	0.0599111	0.0499623	-0.257273	Down		barcode6812.txt	0.459095	0.13806	-1.72622	Down
barcode6816.txt	0.611093	0.449661	-0.441708	Down		barcode6816.txt	0.56825	0.409419	-0.471965	Down
barcode6819.txt	0.319526	0.179864	-0.825532	Down		barcode6819.txt	0.914979	0.476069	-0.941118	Down
barcode6820.txt	0.734909	0.349736	-1.06914	Down		barcode6820.txt	0.953505	0.766471	-0.314641	Down
barcode6822.txt	0.55917	0.169872	-1.71295	Down		barcode6822.txt	1.01771	0.499872	-1.02423	Down
barcode6823.txt	0.0718933	0.0299774	-1.23457	Down		barcode6823.txt	0.34994	0.176145	-0.986288	Down
barcode6824.txt	0.515235	0.349736	-0.557642	Down		barcode6824.txt	0.542567	0.385616	-0.491557	Down
barcode6835.txt	0.159763	0.109917	-0.535452	Down		barcode6835.txt	0.664564	0.390376	-0.766021	Down
barcode6845.txt	0.870708	0.659503	-0.40028	Down		barcode6845.txt	0.834718	0.318966	-1.3851	Down
barcode6849.txt	1.23816	0.859352	-0.526366	Down		barcode6849.txt	1.78501	1.28539	-0.473419	Down
barcode6851.txt	0.930619	0.559578	-0.732824	Down		barcode6851.txt	1.09476	0.466547	-1.22875	Down
barcode6861.txt	0.0678992	0.0199849	-1.71513	Down		barcode6861.txt	0.272889	0	-8.09745	Down
barcode6872.txt	0.383431	0.0699473	-2.43791	Down		barcode6872.txt	0.532935	0.314205	-0.760373	Down
barcode688.txt	0.475294	0.129902	-1.86337	Down		barcode688.txt	0.744825	0.604607	-0.300455	Down
barcode6885.txt	0.487277	0.369721	-0.397364	Down		barcode6885.txt	0.98882	0.590325	-0.743214	Down
barcode6896.txt	0.351478	0.199849	-0.811421	Down		barcode6896.txt	0.590724	0.20471	-1.52431	Down
barcode6910.txt	1.19023	0.839367	-0.503364	Down		barcode6910.txt	1.74649	0.6903	-1.3379	Down
barcode6912.txt	0.730915	0.359729	-1.02076	Down		barcode6912.txt	1.28739	0.328487	-1.96728	Down
barcode6917.txt	0.5392	0.369721	-0.543158	Down		barcode6917.txt	0.735194	0.533197	-0.462714	Down
barcode692.txt	0.994524	0.469646	-1.08081	Down		barcode692.txt	1.56991	0.614129	-1.35264	Down
barcode6931.txt	1.10236	0.659503	-0.740272	Down		barcode6931.txt	0.693458	0.576043	-0.267208	Down
barcode6953.txt	0.199704	0	-7.64892	Down		barcode6953.txt	0.465516	0.147581	-1.65067	Down
barcode6966.txt	0.978547	0.789405	-0.309524	Down		barcode6966.txt	1.12687	0.933095	-0.271959	Down
barcode6968.txt	1.36997	0.969269	-0.498736	Down		barcode6968.txt	1.32271	0.904531	-0.547749	Down
barcode6974.txt	0.822779	0.629525	-0.385702	Down		barcode6974.txt	1.32592	1.01879	-0.379811	Down
barcode6982.txt	0.631063	0.249812	-1.33346	Down		barcode6982.txt	1.01129	0.371334	-1.44296	Down
barcode6984.txt	0.0399407	0.00999247	-1.89702	Down		barcode6984.txt	0.263257	0.157103	-0.741081	Down
barcode6986.txt	0.946595	0.349736	-1.43388	Down		barcode6986.txt	0.558619	0.452265	-0.304089	Down
barcode6990.txt	0.818785	0.579563	-0.497792	Down		barcode6990.txt	0.982399	0.666496	-0.559017	Down
barcode6992.txt	1.23017	0.999247	-0.299679	Down		barcode6992.txt	1.07871	0.785513	-0.457104	Down
barcode7003.txt	0.391419	0.189857	-1.0399	Down		barcode7003.txt	0.63888	0.490351	-0.381049	Down
barcode7004.txt	0.567158	0.269797	-1.06908	Down		barcode7004.txt	0.648512	0.333248	-0.958436	Down
barcode7005.txt	0.0159763	0.00999247	-0.627006	Down		barcode7005.txt	0.372413	0.0618889	-2.56989	Down
barcode7006.txt	0.371449	0	-8.5409	Down		barcode7006.txt	0.523304	0.0809317	-2.67791	Down
barcode7008.txt	0.750885	0.359729	-1.0596	Down		barcode7008.txt	1.22318	0.666496	-0.874988	Down
barcode7010.txt	0.271597	0.139895	-0.952153	Down		barcode7010.txt	0.465516	0.0380855	-3.57722	Down
barcode703.txt	0.351478	0.199849	-0.811421	Down		barcode703.txt	1.27455	0.599847	-1.08605	Down
barcode7047.txt	0.379437	0.109917	-1.77817	Down		barcode7047.txt	1.16539	0.737907	-0.658593	Down
barcode7064.txt	0.119822	0.0399699	-1.56025	Down		barcode7064.txt	0.629249	0.323727	-0.956696	Down
barcode7065.txt	0.195709	0.0399699	-2.26343	Down		barcode7065.txt	0.337098	0.0666496	-2.32129	Down
barcode7068.txt	0.331508	0.219834	-0.590425	Down		barcode7068.txt	0.63888	0.471308	-0.438074	Down
barcode7069.txt	0.870708	0.349736	-1.31346	Down		barcode7069.txt	1.33555	1.09496	-0.28632	Down
barcode7074.txt	0.443342	0.239819	-0.88372	Down		barcode7074.txt	1.10119	0.756949	-0.540194	Down
barcode7077.txt	0.415383	0.159879	-1.37193	Down		barcode7077.txt	0.587513	0.395137	-0.571075	Down
barcode7079.txt	0.4713	0.379714	-0.310998	Down		barcode7079.txt	1.4736	1.05211	-0.485663	Down
barcode7088.txt	1.1423	0.699473	-0.706809	Down		barcode7088.txt	0.905348	0.699821	-0.371019	Down
barcode7103.txt	0.615087	0.469646	-0.388492	Down		barcode7103.txt	1.48965	0.952137	-0.645186	Down
barcode7117.txt	0.5392	0.389706	-0.467409	Down		barcode7117.txt	0.632459	0.480829	-0.39473	Down
barcode7132.txt	0.523223	0.349736	-0.579795	Down		barcode7132.txt	0.542567	0.233274	-1.21426	Down
barcode7139.txt	0.43136	0.289782	-0.572297	Down		barcode7139.txt	0.879664	0.728385	-0.271912	Down
barcode7145.txt	0.655028	0.499623	-0.390031	Down		barcode7145.txt	1.19429	0.990223	-0.270078	Down
barcode7166.txt	0.643045	0.469646	-0.452521	Down		barcode7166.txt	0.613197	0.428462	-0.516171	Down
barcode7181.txt	0.347484	0.169872	-1.02818	Down		barcode7181.txt	0.49441	0.142821	-1.78435	Down
barcode7184.txt	0.119822	0.0599548	-0.987073	Down		barcode7184.txt	0.751246	0.233274	-1.68301	Down
barcode7199.txt	0.423372	0.299774	-0.496648	Down		barcode7199.txt	0.452674	0.290402	-0.638646	Down
barcode72.txt	0.435354	0.259804	-0.742532	Down		barcode72.txt	0.661354	0.352291	-0.906745	Down
barcode7207.txt	1.00251	0.779412	-0.362749	Down		barcode7207.txt	1.36123	0.661736	-1.03947	Down
barcode7208.txt	1.1463	0.949284	-0.27181	Down		barcode7208.txt	1.65017	1.14733	-0.52396	Down
barcode7211.txt	1.00251	0.779412	-0.362749	Down		barcode7211.txt	1.36123	0.671257	-1.01889	Down
barcode7214.txt	1.13831	0.909314	-0.323724	Down		barcode7214.txt	1.95838	0.818838	-1.25698	Down
barcode7215.txt	0.0878696	0.0199849	-2.08234	Down		barcode7215.txt	0.504041	0.161863	-1.63274	Down
barcode7221.txt	0.00399407	0	-2.32022	Down		barcode7221.txt	0.478358	0.161863	-1.55744	Down
barcode7230.txt	0.43136	0.269797	-0.675023	Down		barcode7230.txt	0.831508	0.328487	-1.33724	Down
barcode7238.txt	0.623075	0.479638	-0.376768	Down		barcode7238.txt	0.950294	0.471308	-1.01016	Down
barcode7249.txt	1.2102	0.949284	-0.35001	Down		barcode7249.txt	1.37728	0.980702	-0.489518	Down
barcode7257.txt	0.930619	0.659503	-0.496175	Down		barcode7257.txt	0.773719	0.62365	-0.310626	Down
barcode7263.txt	0.299555	0.219834	-0.444667	Down		barcode7263.txt	1.14934	0.490351	-1.22724	Down
barcode7268.txt	0.247632	0.109917	-1.16453	Down		barcode7268.txt	0.613197	0.385616	-0.667801	Down
barcode7271.txt	1.36597	0.839367	-0.701892	Down		barcode7271.txt	1.9038	0.76171	-1.32043	Down
barcode729.txt	0.491271	0.289782	-0.759517	Down		barcode729.txt	0.873244	0.671257	-0.379023	Down
barcode7300.txt	0.00399407	0	-2.32022	Down		barcode7300.txt	0.0513673	0	-5.71059	Down
barcode7303.txt	0.32352	0.159879	-1.01233	Down		barcode7303.txt	0.927821	0.547479	-0.759965	Down
barcode7304.txt	1.05843	0.679488	-0.638646	Down		barcode7304.txt	1.46397	0.680778	-1.10349	Down
barcode734.txt	2.16878	1.62877	-0.412879	Down		barcode734.txt	1.79464	1.25682	-0.513574	Down
barcode7344.txt	0.0479289	0.0299774	-0.65947	Down		barcode7344.txt	0.362781	0.238034	-0.605853	Down
barcode7347.txt	1.19023	0.669495	-0.829157	Down		barcode7347.txt	1.82996	0.799795	-1.19309	Down
barcode7349.txt	0.115828	0.0399699	-1.51175	Down		barcode7349.txt	0.189417	0.0952137	-0.984846	Down
barcode7354.txt	0.355472	0.229827	-0.62698	Down		barcode7354.txt	0.452674	0.361812	-0.322433	Down
barcode7357.txt	0.131804	0.109917	-0.25982	Down		barcode7357.txt	0.337098	0.180906	-0.894246	Down
barcode7378.txt	0.826773	0.489631	-0.754597	Down		barcode7378.txt	0.796193	0.480829	-0.726406	Down
barcode7386.txt	0.203698	0.0999247	-1.02022	Down		barcode7386.txt	0.147681	0.119017	-0.308978	Down
barcode7391.txt	0.507247	0.409691	-0.307476	Down		barcode7391.txt	0.927821	0.499872	-0.890959	Down
barcode7396.txt	0.167751	0.0899322	-0.892033	Down		barcode7396.txt	1.27134	0.795035	-0.676581	Down
barcode7397.txt	0.563164	0.319759	-0.814625	Down		barcode7397.txt	1.47039	0.366573	-2.00108	Down
barcode7398.txt	0.207692	0.0299774	-2.75209	Down		barcode7398.txt	0.654933	0.076171	-3.08742	Down
barcode7399.txt	0.0359466	0	-5.20737	Down		barcode7399.txt	0.176575	0.0523676	-1.73439	Down
barcode740.txt	0.655028	0.519608	-0.333559	Down		barcode740.txt	0.91819	0.376094	-1.28544	Down
barcode7413.txt	0.850737	0.209842	-2.01425	Down		barcode7413.txt	1.02092	0.233274	-2.12502	Down
barcode7415.txt	0.583134	0.479638	-0.281349	Down		barcode7415.txt	0.626039	0.452265	-0.468198	Down
barcode7439.txt	0.523223	0.399699	-0.387664	Down		barcode7439.txt	0.510462	0.41894	-0.284443	Down
barcode7443.txt	0.371449	0.289782	-0.357106	Down		barcode7443.txt	0.42699	0.20947	-1.02396	Down
barcode7454.txt	0.607099	0.479638	-0.339354	Down		barcode7454.txt	1.10761	0.34753	-1.66939	Down
barcode7479.txt	0.411389	0.139895	-1.54939	Down		barcode7479.txt	0.436622	0.27612	-0.659174	Down
barcode749.txt	0.619081	0.509616	-0.280219	Down		barcode749.txt	1.05303	0.647453	-0.70084	Down
barcode7498.txt	1.11435	0.779412	-0.515183	Down		barcode7498.txt	1.47681	1.13304	-0.381984	Down
barcode7542.txt	0.34349	0.249812	-0.457858	Down		barcode7542.txt	0.250415	0.199949	-0.323245	Down
barcode7555.txt	1.1463	0.76942	-0.574524	Down		barcode7555.txt	1.0434	0.642693	-0.698227	Down
barcode7560.txt	0.615087	0.509616	-0.270896	Down		barcode7560.txt	1.13008	0.633171	-0.834756	Down
barcode7562.txt	0.34349	0.209842	-0.708302	Down		barcode7562.txt	0.49441	0.109496	-2.16463	Down
barcode7563.txt	1.53772	0.749435	-1.03593	Down		barcode7563.txt	1.27776	0.723624	-0.819441	Down
barcode7575.txt	1.12233	0.799397	-0.488999	Down		barcode7575.txt	1.09155	0.814078	-0.422696	Down
barcode7584.txt	0.563164	0.459653	-0.292433	Down		barcode7584.txt	0.818666	0.41418	-0.9813	Down
barcode7588.txt	0.958577	0.569571	-0.749993	Down		barcode7588.txt	0.940663	0.6903	-0.4459	Down
barcode7603.txt	0.762868	0.569571	-0.420917	Down		barcode7603.txt	1.06266	0.699821	-0.60192	Down
barcode7605.txt	0.223668	0.0499623	-2.14029	Down		barcode7605.txt	0.719142	0.0618889	-3.5174	Down
barcode7606.txt	0.45133	0.219834	-1.03441	Down		barcode7606.txt	1.21355	0.466547	-1.37724	Down
barcode7609.txt	0.243638	0.0799397	-1.59573	Down		barcode7609.txt	0.577882	0.123778	-2.21391	Down
barcode7629.txt	0.327514	0.239819	-0.448004	Down		barcode7629.txt	0.513673	0.295163	-0.797266	Down
barcode7633.txt	0.682986	0.509616	-0.421729	Down		barcode7633.txt	1.76254	1.00451	-0.810553	Down
barcode7647.txt	0.387425	0.319759	-0.276146	Down		barcode7647.txt	1.39976	0.823599	-0.764443	Down
barcode767.txt	1.40991	1.03922	-0.439739	Down		barcode767.txt	1.0145	0.823599	-0.300431	Down
barcode7672.txt	0.659022	0.489631	-0.427876	Down		barcode7672.txt	0.792982	0.490351	-0.692353	Down
barcode7673.txt	0.415383	0.229827	-0.851102	Down		barcode7673.txt	0.950294	0.247556	-1.93632	Down
barcode7677.txt	0.826773	0.569571	-0.536829	Down		barcode7677.txt	1.55065	0.661736	-1.2273	Down
barcode7686.txt	0.0718933	0.0399699	-0.831223	Down		barcode7686.txt	0.687037	0.185667	-1.88202	Down
barcode7720.txt	0.283579	0.209842	-0.432669	Down		barcode7720.txt	0.590724	0.333248	-0.824004	Down
barcode7723.txt	0.651034	0.279789	-1.21546	Down		barcode7723.txt	0.748036	0.614129	-0.284147	Down
barcode773.txt	0.894672	0.309766	-1.52714	Down		barcode773.txt	1.00487	0.642693	-0.644003	Down
barcode7737.txt	0.00399407	0	-2.32022	Down		barcode7737.txt	0.186206	0	-7.54849	Down
barcode7739.txt	0.171745	0.0699473	-1.28383	Down		barcode7739.txt	0.767299	0.0238034	-4.95306	Down
barcode7743.txt	0.163757	0.0899322	-0.857476	Down		barcode7743.txt	0.536146	0.0238034	-4.4367	Down
barcode7758.txt	0.858725	0.389706	-1.13779	Down		barcode7758.txt	1.00808	0.82836	-0.282975	Down
barcode7760.txt	0.447336	0.319759	-0.483091	Down		barcode7760.txt	0.966347	0.123778	-2.95467	Down
barcode7765.txt	0.551182	0.369721	-0.574809	Down		barcode7765.txt	0.860402	0.514154	-0.741682	Down
barcode7784.txt	0.0479289	0	-5.61261	Down		barcode7784.txt	0.327466	0.128539	-1.34236	Down
barcode7792.txt	0.463312	0.129902	-1.82661	Down		barcode7792.txt	0.398096	0.185667	-1.09627	Down
barcode7799.txt	0.231656	0.149887	-0.624731	Down		barcode7799.txt	0.757667	0.128539	-2.55009	Down
barcode7810.txt	1.05044	0.76942	-0.448651	Down		barcode7810.txt	0.914979	0.766471	-0.255204	Down
barcode7820.txt	1.17825	0.919307	-0.357684	Down		barcode7820.txt	0.77693	0.480829	-0.691118	Down
barcode7839.txt	0.131804	0.0799397	-0.714383	Down		barcode7839.txt	0.414149	0.342769	-0.272186	Down
barcode7840.txt	1.86124	1.35898	-0.453456	Down		barcode7840.txt	1.76896	1.45201	-0.284673	Down
barcode7841.txt	0.659022	0.519608	-0.342315	Down		barcode7841.txt	0.613197	0.399898	-0.615467	Down
barcode7842.txt	0.531211	0.329751	-0.686252	Down		barcode7842.txt	0.49441	0.323727	-0.609397	Down
barcode7843.txt	0.199704	0.0399699	-2.29243	Down		barcode7843.txt	0.166944	0.076171	-1.12185	Down
barcode786.txt	0.475294	0.369721	-0.361519	Down		barcode786.txt	0.536146	0.271359	-0.979803	Down
barcode7870.txt	1.01449	0.509616	-0.991872	Down		barcode7870.txt	1.28739	0.890249	-0.531672	Down
barcode7872.txt	1.58964	1.27904	-0.313424	Down		barcode7872.txt	1.66302	1.0902	-0.608757	Down
barcode788.txt	0.0159763	0	-4.08545	Down		barcode788.txt	0.105945	0	-6.74073	Down
barcode7885.txt	0.515235	0.399699	-0.365511	Down		barcode7885.txt	1.17824	0.96642	-0.28564	Down
barcode7893.txt	0.303549	0.249812	-0.280072	Down		barcode7893.txt	0.465516	0.171385	-1.43629	Down
barcode7895.txt	0.403401	0.269797	-0.578578	Down		barcode7895.txt	0.812245	0.557	-0.543424	Down
barcode7906.txt	1.02648	0.439668	-1.22134	Down		barcode7906.txt	0.99203	0.814078	-0.284901	Down
barcode7907.txt	0.351478	0.179864	-0.962626	Down		barcode7907.txt	1.15576	0.318966	-1.8541	Down
barcode791.txt	0.0359466	0.0299774	-0.254227	Down		barcode791.txt	0.581092	0.0476069	-3.58202	Down
barcode7913.txt	0.303549	0.0699473	-2.10186	Down		barcode7913.txt	1.20713	0.366573	-1.71667	Down
barcode7915.txt	0.503253	0.389706	-0.368064	Down		barcode7915.txt	0.956715	0.352291	-1.43874	Down
barcode7919.txt	0.135798	0.109917	-0.302569	Down		barcode7919.txt	0.170154	0.0476069	-1.81606	Down
barcode7929.txt	0.423372	0.289782	-0.545392	Down		barcode7929.txt	1.21034	0.318966	-1.92061	Down
barcode7939.txt	0.0159763	0	-4.08545	Down		barcode7939.txt	0.163733	0.114256	-0.515283	Down
barcode794.txt	0.43136	0.329751	-0.386485	Down		barcode794.txt	0.796193	0.218992	-1.85748	Down
barcode7940.txt	0.163757	0	-7.3642	Down		barcode7940.txt	0.738404	0.314205	-1.23007	Down
barcode7941.txt	0.275591	0.139895	-0.973138	Down		barcode7941.txt	0.738404	0.428462	-0.783834	Down
barcode7942.txt	0.663016	0.279789	-1.24173	Down		barcode7942.txt	0.150891	0.0618889	-1.27216	Down
barcode7947.txt	0.0399407	0.0299774	-0.40232	Down		barcode7947.txt	0.333887	0.0904531	-1.87257	Down
barcode7948.txt	0.319526	0.229827	-0.47363	Down		barcode7948.txt	0.802614	0.499872	-0.682059	Down
barcode7949.txt	0.00798814	0	-3.16802	Down		barcode7949.txt	0.382044	0.0428462	-3.12699	Down
barcode7976.txt	0.459318	0.309766	-0.566801	Down		barcode7976.txt	1.25529	0.523676	-1.25967	Down
barcode7977.txt	0.459318	0.249812	-0.876027	Down		barcode7977.txt	1.23281	0.542718	-1.18219	Down
barcode7983.txt	0.159763	0.00999247	-3.87035	Down		barcode7983.txt	0.324256	0.0618889	-2.3707	Down
barcode80.txt	0.910648	0.639518	-0.509239	Down		barcode80.txt	0.626039	0.48559	-0.365847	Down
barcode8015.txt	0.531211	0.419684	-0.339264	Down		barcode8015.txt	0.911769	0.647453	-0.493247	Down
barcode8021.txt	0.786832	0.589555	-0.415815	Down		barcode8021.txt	0.542567	0.385616	-0.491557	Down
barcode8025.txt	1.0784	0.509616	-1.07992	Down		barcode8025.txt	0.898927	0.728385	-0.303127	Down
barcode8035.txt	0.179733	0.129902	-0.465374	Down		barcode8035.txt	0.404517	0.338009	-0.258441	Down
barcode8037.txt	0.742897	0.449661	-0.723061	Down		barcode8037.txt	1.56349	1.28539	-0.28237	Down
barcode8038.txt	0.275591	0.179864	-0.612845	Down		barcode8038.txt	1.41581	0.62365	-1.18153	Down
barcode8053.txt	0.531211	0.419684	-0.339264	Down		barcode8053.txt	0.561829	0.423701	-0.40625	Down
barcode8070.txt	0.974553	0.779412	-0.321984	Down		barcode8070.txt	0.735194	0.457026	-0.684657	Down
barcode8111.txt	0.694968	0.549586	-0.338055	Down		barcode8111.txt	0.979189	0.76171	-0.361925	Down
barcode8124.txt	0.0199704	0	-4.39028	Down		barcode8124.txt	0.465516	0.0428462	-3.4114	Down
barcode8125.txt	0.435354	0.159879	-1.43952	Down		barcode8125.txt	0.882875	0.499872	-0.8194	Down
barcode8132.txt	0.0519229	0.0299774	-0.772677	Down		barcode8132.txt	0.163733	0.0856924	-0.926154	Down
barcode8137.txt	0.0359466	0.00999247	-1.74893	Down		barcode8137.txt	0.414149	0.0856924	-2.25965	Down
barcode8138.txt	0.00798814	0	-3.16802	Down		barcode8138.txt	0.288941	0.171385	-0.750127	Down
barcode8153.txt	1.05044	0.699473	-0.585967	Down		barcode8153.txt	1.13329	0.528436	-1.09926	Down
barcode8164.txt	0.183727	0.149887	-0.291929	Down		barcode8164.txt	0.459095	0.247556	-0.888362	Down
barcode8180.txt	0.479289	0.11991	-1.98997	Down		barcode8180.txt	0.317835	0.185667	-0.772344	Down
barcode8195.txt	0.894672	0.699473	-0.354642	Down		barcode8195.txt	1.10119	0.680778	-0.692993	Down
barcode8200.txt	1.38594	1.04921	-0.401232	Down		barcode8200.txt	2.04185	1.59483	-0.356275	Down
barcode8204.txt	1.0784	0.699473	-0.623828	Down		barcode8204.txt	1.69191	1.10924	-0.608633	Down
barcode8210.txt	0.219674	0.179864	-0.287008	Down		barcode8210.txt	0.590724	0.309445	-0.930587	Down
barcode8219.txt	0.806802	0.549586	-0.553035	Down		barcode8219.txt	0.593934	0.266598	-1.15266	Down
barcode8220.txt	0.00399407	0	-2.32022	Down		barcode8220.txt	0.0545777	0.0380855	-0.507873	Down
barcode8229.txt	0.423372	0.269797	-0.648118	Down		barcode8229.txt	0.982399	0.76171	-0.366642	Down
barcode8236.txt	0.0838755	0.0499623	-0.735917	Down		barcode8236.txt	0.0513673	0.0333248	-0.609414	Down
barcode8248.txt	0.55917	0.239819	-1.21791	Down		barcode8248.txt	0.42057	0.285641	-0.556524	Down
barcode8259.txt	0.427366	0.249812	-0.772238	Down		barcode8259.txt	0.70951	0.514154	-0.463851	Down
barcode8261.txt	0.467306	0.339744	-0.458765	Down		barcode8261.txt	0.873244	0.537958	-0.697863	Down
barcode8271.txt	0.607099	0.389706	-0.638222	Down		barcode8271.txt	0.548988	0.34753	-0.658116	Down
barcode8275.txt	0.786832	0.659503	-0.254324	Down		barcode8275.txt	0.500831	0.257077	-0.959399	Down
barcode8283.txt	0.455324	0.369721	-0.299724	Down		barcode8283.txt	0.513673	0.34753	-0.562372	Down
barcode8288.txt	0.603105	0.419684	-0.522063	Down		barcode8288.txt	0.889296	0.495111	-0.84362	Down
barcode83.txt	3.14733	2.46814	-0.350578	Down		barcode83.txt	3.38382	2.56601	-0.398989	Down
barcode830.txt	0.191715	0.159879	-0.260492	Down		barcode830.txt	0.459095	0.247556	-0.888362	Down
barcode8313.txt	0.786832	0.629525	-0.321334	Down		barcode8313.txt	0.626039	0.385616	-0.697654	Down
barcode8314.txt	1.48979	1.20909	-0.300963	Down		barcode8314.txt	1.38692	0.937855	-0.563946	Down
barcode8337.txt	0.275591	0.219834	-0.32479	Down		barcode8337.txt	1.27776	1.05211	-0.280088	Down
barcode8347.txt	1.12233	0.779412	-0.525478	Down		barcode8347.txt	1.40618	1.07115	-0.392293	Down
barcode836.txt	0.415383	0.309766	-0.422082	Down		barcode836.txt	0.587513	0.323727	-0.857848	Down
barcode8361.txt	0.942601	0.589555	-0.676104	Down		barcode8361.txt	1.34839	1.01879	-0.40404	Down
barcode8368.txt	0.519229	0.379714	-0.450441	Down		barcode8368.txt	0.536146	0.366573	-0.547283	Down
barcode8371.txt	0.483283	0.259804	-0.892883	Down		barcode8371.txt	2.63578	0.704582	-1.90189	Down
barcode8388.txt	1.12233	0.579563	-0.952262	Down		barcode8388.txt	1.0755	0.647453	-0.731276	Down
barcode8390.txt	1.60961	1.11916	-0.523908	Down		barcode8390.txt	1.49607	0.999744	-0.58107	Down
barcode8393.txt	1.31804	0.839367	-0.650401	Down		barcode8393.txt	1.1044	0.733146	-0.590425	Down
barcode8398.txt	0.690974	0.519608	-0.41052	Down		barcode8398.txt	0.500831	0.223752	-1.15887	Down
barcode8404.txt	0.655028	0.419684	-0.641021	Down		barcode8404.txt	0.581092	0.404658	-0.520982	Down
barcode8409.txt	1.0105	0.519608	-0.958226	Down		barcode8409.txt	0.902138	0.709342	-0.346431	Down
barcode841.txt	0.627069	0.199849	-1.64481	Down		barcode841.txt	0.484779	0.371334	-0.383703	Down
barcode8419.txt	0.722927	0.379714	-0.927138	Down		barcode8419.txt	0.674195	0.318966	-1.07739	Down
barcode8444.txt	0.135798	0.0799397	-0.757132	Down		barcode8444.txt	0.914979	0.13806	-2.71961	Down
barcode8449.txt	0.283579	0.0599548	-2.22302	Down		barcode8449.txt	0.455885	0.214231	-1.08594	Down
barcode8451.txt	0.231656	0.0299774	-2.90891	Down		barcode8451.txt	0.529725	0.157103	-1.7471	Down
barcode8464.txt	0.463312	0.319759	-0.533606	Down		barcode8464.txt	1.3195	0.704582	-0.904196	Down
barcode8469.txt	0.139792	0.0699473	-0.988752	Down		barcode8469.txt	0.561829	0.166624	-1.74747	Down
barcode8470.txt	0.247632	0.0299774	-3.00473	Down		barcode8470.txt	0.619618	0.152342	-2.01695	Down
barcode8471.txt	0.259615	0.0499623	-2.35441	Down		barcode8471.txt	0.256836	0.20947	-0.292839	Down
barcode8474.txt	0.467306	0.359729	-0.376538	Down		barcode8474.txt	1.11724	0.247556	-2.16959	Down
barcode8477.txt	0.467306	0.239819	-0.959502	Down		barcode8477.txt	0.98882	0.699821	-0.49812	Down
barcode8482.txt	0.0918636	0	-6.53704	Down		barcode8482.txt	1.20071	0.947377	-0.341556	Down
barcode8488.txt	0.746891	0.489631	-0.608191	Down		barcode8488.txt	0.927821	0.352291	-1.39454	Down
barcode8498.txt	0.223668	0.0199849	-3.42037	Down		barcode8498.txt	0.664564	0.323727	-1.03535	Down
barcode850.txt	1.03446	0.319759	-1.69072	Down		barcode850.txt	1.17182	0.680778	-0.782602	Down
barcode8500.txt	1.20222	0.929299	-0.371128	Down		barcode8500.txt	0.542567	0.433223	-0.324023	Down
barcode8504.txt	0.279585	0.209842	-0.412277	Down		barcode8504.txt	1.03377	0.371334	-1.47464	Down
barcode851.txt	1.44186	0.939292	-0.617751	Down		barcode851.txt	1.21355	0.871206	-0.477683	Down
barcode8533.txt	0.954583	0.479638	-0.991429	Down		barcode8533.txt	1.58917	1.114	-0.512141	Down
barcode8538.txt	0.147781	0.0899322	-0.710324	Down		barcode8538.txt	0.507252	0.176145	-1.52061	Down
barcode8550.txt	0.978547	0.72945	-0.42333	Down		barcode8550.txt	0.927821	0.642693	-0.529029	Down
barcode856.txt	0.0718933	0.0499623	-0.516355	Down		barcode856.txt	0.581092	0.0999744	-2.52726	Down
barcode8560.txt	1.76937	1.12915	-0.647541	Down		barcode8560.txt	1.42544	1.11876	-0.349229	Down
barcode8567.txt	0.483283	0.389706	-0.309765	Down		barcode8567.txt	0.693458	0.528436	-0.391431	Down
barcode8568.txt	0.495265	0.249812	-0.984506	Down		barcode8568.txt	0.42699	0.242795	-0.81191	Down
barcode8587.txt	0.21568	0.0899322	-1.2527	Down		barcode8587.txt	0.886085	0.48559	-0.866366	Down
barcode8589.txt	0.303549	0.239819	-0.338726	Down		barcode8589.txt	0.574671	0.371334	-0.628649	Down
barcode8590.txt	0.0639051	0	-6.02026	Down		barcode8590.txt	0.317835	0.0952137	-1.72849	Down
barcode8595.txt	0.0878696	0.0599548	-0.54395	Down		barcode8595.txt	0.542567	0.342769	-0.661016	Down
barcode860.txt	1.98106	1.64876	-0.264747	Down		barcode860.txt	2.9793	1.94236	-0.616905	Down
barcode8602.txt	0.251626	0.139895	-0.84239	Down		barcode8602.txt	0.523304	0.180906	-1.52721	Down
barcode8604.txt	0.750885	0.529601	-0.502886	Down		barcode8604.txt	0.738404	0.595086	-0.310843	Down
barcode8609.txt	0.231656	0.0199849	-3.47077	Down		barcode8609.txt	0.886085	0.0809317	-3.43658	Down
barcode8623.txt	0.854731	0.539593	-0.662615	Down		barcode8623.txt	0.828297	0.409419	-1.01479	Down
barcode8640.txt	0.678992	0.529601	-0.357891	Down		barcode8640.txt	1.07229	0.437983	-1.2898	Down
barcode8641.txt	1.50177	1.00924	-0.572928	Down		barcode8641.txt	1.39976	0.642693	-1.12176	Down
barcode866.txt	1.74541	1.37896	-0.339765	Down		barcode866.txt	1.66944	1.39488	-0.259049	Down
barcode8664.txt	0.663016	0.489631	-0.43658	Down		barcode8664.txt	0.927821	0.76171	-0.284266	Down
barcode8666.txt	0.838755	0.599548	-0.483689	Down		barcode8666.txt	0.683827	0.357052	-0.935572	Down
barcode8668.txt	0.878696	0.469646	-0.902363	Down		barcode8668.txt	0.902138	0.447505	-1.00982	Down
barcode8672.txt	0.00399407	0	-2.32022	Down		barcode8672.txt	0.0545777	0.0190428	-1.47143	Down
barcode8677.txt	0.283579	0.209842	-0.432669	Down		barcode8677.txt	0.715931	0.433223	-0.7234	Down
barcode8678.txt	0.591123	0.489631	-0.271258	Down		barcode8678.txt	0.966347	0.652214	-0.566477	Down
barcode8681.txt	0.742897	0.529601	-0.487477	Down		barcode8681.txt	0.815455	0.642693	-0.343002	Down
barcode8682.txt	1.18624	0.899322	-0.399098	Down		barcode8682.txt	1.90059	1.26634	-0.585399	Down
barcode8699.txt	1.16627	0.969269	-0.26668	Down		barcode8699.txt	1.18145	0.704582	-0.744891	Down
barcode8704.txt	1.17825	0.939292	-0.32669	Down		barcode8704.txt	1.27134	0.495111	-1.35875	Down
barcode8710.txt	0.762868	0.60954	-0.323236	Down		barcode8710.txt	0.629249	0.27612	-1.18541	Down
barcode8712.txt	0.475294	0.339744	-0.483166	Down		barcode8712.txt	0.931032	0.461787	-1.01003	Down
barcode8719.txt	0.143787	0.11991	-0.259999	Down		barcode8719.txt	0.748036	0.228513	-1.70646	Down
barcode8727.txt	0.962571	0.679488	-0.501822	Down		barcode8727.txt	1.21034	0.89977	-0.427375	Down
barcode8736.txt	1.10236	0.60954	-0.85375	Down		barcode8736.txt	1.65659	0.923573	-0.842231	Down
barcode8745.txt	1.04645	0.819382	-0.352509	Down		barcode8745.txt	1.02413	0.609368	-0.748063	Down
barcode8748.txt	1.35	0.879337	-0.617896	Down		barcode8748.txt	1.01771	0.699821	-0.539631	Down
barcode8761.txt	0.439348	0.00999247	-5.32406	Down		barcode8761.txt	0.35315	0.218992	-0.686912	Down
barcode8762.txt	0.770856	0.539593	-0.513788	Down		barcode8762.txt	0.9214	0.561761	-0.71287	Down
barcode8766.txt	1.40591	1.0592	-0.408195	Down		barcode8766.txt	1.69833	0.799795	-1.08546	Down
barcode8768.txt	0.631063	0.529601	-0.252442	Down		barcode8768.txt	0.956715	0.666496	-0.520837	Down
barcode8781.txt	0.327514	0.189857	-0.783463	Down		barcode8781.txt	0.609986	0.366573	-0.73311	Down
barcode8784.txt	0.706951	0.439668	-0.683955	Down		barcode8784.txt	1.12045	0.704582	-0.668478	Down
barcode8786.txt	0.0119822	0	-3.69846	Down		barcode8786.txt	0.173365	0.0571282	-1.5848	Down
barcode8788.txt	1.2781	0.72945	-0.808275	Down		barcode8788.txt	1.48002	1.04259	-0.505035	Down
barcode8791.txt	0.287573	0.179864	-0.674029	Down		barcode8791.txt	0.748036	0.542718	-0.462175	Down
barcode8798.txt	0.567158	0.409691	-0.468239	Down		barcode8798.txt	1.11403	0.871206	-0.354339	Down
barcode8807.txt	0.690974	0.539593	-0.356175	Down		barcode8807.txt	0.834718	0.41894	-0.992831	Down
barcode8830.txt	0.459318	0.219834	-1.05967	Down		barcode8830.txt	0.513673	0.299923	-0.774259	Down
barcode884.txt	0.690974	0.449661	-0.618676	Down		barcode884.txt	1.43507	0.852163	-0.751236	Down
barcode8850.txt	0.34349	0.169872	-1.01155	Down		barcode8850.txt	0.478358	0.247556	-0.947533	Down
barcode8855.txt	0.690974	0.389706	-0.824634	Down		barcode8855.txt	0.972768	0.304684	-1.67154	Down
barcode8875.txt	0.499259	0.289782	-0.782739	Down		barcode8875.txt	0.953505	0.733146	-0.378686	Down
barcode8889.txt	1.21819	0.949284	-0.359494	Down		barcode8889.txt	1.65659	1.29015	-0.360439	Down
barcode8896.txt	0.738903	0.349736	-1.07695	Down		barcode8896.txt	0.597144	0.48559	-0.297787	Down
barcode8899.txt	0.834761	0.699473	-0.254762	Down		barcode8899.txt	0.767299	0.561761	-0.449144	Down
barcode8908.txt	1.80133	1.4589	-0.303991	Down		barcode8908.txt	1.95196	1.34727	-0.534545	Down
barcode8909.txt	0.92263	0.589555	-0.645243	Down		barcode8909.txt	0.963136	0.41894	-1.19905	Down
barcode8912.txt	0.403401	0.209842	-0.939626	Down		barcode8912.txt	0.690248	0.280881	-1.29412	Down
barcode8916.txt	0.339496	0.189857	-0.835147	Down		barcode8916.txt	0.979189	0.328487	-1.57284	Down
barcode8919.txt	0.730915	0.389706	-0.905592	Down		barcode8919.txt	1.10119	0.457026	-1.26687	Down
barcode8929.txt	0.463312	0.289782	-0.67516	Down		barcode8929.txt	0.815455	0.55224	-0.561469	Down
barcode8936.txt	0.651034	0.399699	-0.702429	Down		barcode8936.txt	1.13329	0.633171	-0.838845	Down
barcode8947.txt	0.818785	0.629525	-0.378691	Down		barcode8947.txt	0.809034	0.314205	-1.36169	Down
barcode8954.txt	1.38994	1.01923	-0.44716	Down		barcode8954.txt	1.16861	0.528436	-1.14349	Down
barcode8965.txt	0.659022	0.409691	-0.68446	Down		barcode8965.txt	0.603565	0.380855	-0.662874	Down
barcode8969.txt	1.6136	1.15913	-0.4769	Down		barcode8969.txt	2.17669	1.34251	-0.696786	Down
barcode8970.txt	0.443342	0.149887	-1.5582	Down		barcode8970.txt	0.703089	0.504633	-0.477669	Down
barcode8974.txt	0.307543	0.0699473	-2.12065	Down		barcode8974.txt	0.982399	0.199949	-2.29095	Down
barcode8994.txt	1.15029	0.859352	-0.420255	Down		barcode8994.txt	1.3516	1.05211	-0.361078	Down
barcode8995.txt	1.4179	0.939292	-0.593588	Down		barcode8995.txt	1.59881	1.18541	-0.431293	Down
barcode9000.txt	0.179733	0.139895	-0.359246	Down		barcode9000.txt	0.324256	0.257077	-0.333773	Down
barcode9007.txt	0.802808	0.539593	-0.572308	Down		barcode9007.txt	0.85077	0.661736	-0.362031	Down
barcode9010.txt	0.563164	0.429676	-0.389512	Down		barcode9010.txt	1.0145	0.537958	-0.913951	Down
barcode902.txt	0.291567	0.0799397	-1.85385	Down		barcode902.txt	0.703089	0.123778	-2.4964	Down
barcode9028.txt	0.631063	0.469646	-0.425427	Down		barcode9028.txt	0.574671	0.223752	-1.35691	Down
barcode9035.txt	0.487277	0.369721	-0.397364	Down		barcode9035.txt	0.256836	0.0856924	-1.57248	Down
barcode9040.txt	1.13432	0.949284	-0.256663	Down		barcode9040.txt	0.998451	0.76171	-0.390002	Down
barcode9048.txt	0.0239644	0.0199849	-0.25052	Down		barcode9048.txt	0.56825	0.0856924	-2.71509	Down
barcode9051.txt	0.179733	0.129902	-0.465374	Down		barcode9051.txt	0.42057	0.318966	-0.397852	Down
barcode9053.txt	0.511241	0.399699	-0.354305	Down		barcode9053.txt	0.632459	0.447505	-0.49813	Down
barcode9069.txt	0.583134	0.449661	-0.374258	Down		barcode9069.txt	0.484779	0.304684	-0.668258	Down
barcode9070.txt	0.111834	0.0899322	-0.311339	Down		barcode9070.txt	0.42378	0.166624	-1.34149	Down
barcode9075.txt	0.547188	0.379714	-0.525964	Down		barcode9075.txt	0.805824	0.48559	-0.729547	Down
barcode9084.txt	0.435354	0.339744	-0.356811	Down		barcode9084.txt	0.561829	0.133299	-2.06725	Down
barcode9087.txt	0.103846	0.0499623	-1.04077	Down		barcode9087.txt	0.250415	0.123778	-1.01071	Down
barcode9088.txt	0.231656	0.139895	-0.723584	Down		barcode9088.txt	1.1044	0.352291	-1.64564	Down
barcode9094.txt	0.143787	0.0699473	-1.02911	Down		barcode9094.txt	1.13008	0.218992	-2.36218	Down
barcode9100.txt	0.930619	0.619533	-0.586232	Down		barcode9100.txt	0.626039	0.518915	-0.270279	Down
barcode9107.txt	0.595117	0.389706	-0.609511	Down		barcode9107.txt	0.63888	0.395137	-0.691803	Down
barcode9111.txt	0.307543	0.159879	-0.939494	Down		barcode9111.txt	0.561829	0.318966	-0.814779	Down
barcode9117.txt	0.43136	0.349736	-0.301845	Down		barcode9117.txt	0.664564	0.285641	-1.21533	Down
barcode913.txt	0.778844	0.639518	-0.283947	Down		barcode913.txt	0.468726	0.34753	-0.430537	Down
barcode9136.txt	0.635057	0.449661	-0.497114	Down		barcode9136.txt	1.24566	0.875966	-0.50747	Down
barcode9140.txt	0.762868	0.549586	-0.472356	Down		barcode9140.txt	0.584303	0.352291	-0.728326	Down
barcode9152.txt	0.854731	0.439668	-0.957464	Down		barcode9152.txt	0.815455	0.504633	-0.691284	Down
barcode9168.txt	0.0199704	0	-4.39028	Down		barcode9168.txt	0.237574	0.0523676	-2.1604	Down
barcode9170.txt	0.758874	0.289782	-1.38582	Down		barcode9170.txt	0.34994	0.0714103	-2.27696	Down
barcode9174.txt	0.0279585	0.00999247	-1.39747	Down		barcode9174.txt	0.330677	0.0809317	-2.01728	Down
barcode9184.txt	0.0319526	0	-5.04232	Down		barcode9184.txt	0.128418	0.0904531	-0.500937	Down
barcode9189.txt	1.17825	0.929299	-0.342104	Down		barcode9189.txt	1.21034	1.00927	-0.261871	Down
barcode9192.txt	0.407395	0.209842	-0.953805	Down		barcode9192.txt	0.748036	0.380855	-0.97201	Down
barcode9216.txt	0.563164	0.399699	-0.493597	Down		barcode9216.txt	0.873244	0.442744	-0.978308	Down
barcode9235.txt	2.40044	1.47888	-0.698413	Down		barcode9235.txt	2.26016	1.58055	-0.515725	Down
barcode9236.txt	2.36449	1.35898	-0.798559	Down		barcode9236.txt	2.44316	1.57579	-0.632348	Down
barcode9237.txt	0.0599111	0.0499623	-0.257273	Down		barcode9237.txt	0.260047	0.0666496	-1.94815	Down
barcode9251.txt	0.395413	0.209842	-0.910844	Down		barcode9251.txt	1.05624	0.557	-0.921964	Down
barcode9258.txt	1.35	0.859352	-0.651024	Down		barcode9258.txt	1.37086	0.809317	-0.759579	Down
barcode9262.txt	0.814791	0.64951	-0.326627	Down		barcode9262.txt	1.79464	0.994984	-0.850307	Down
barcode9271.txt	1.35	0.959277	-0.492501	Down		barcode9271.txt	1.2296	0.595086	-1.04577	Down
barcode9272.txt	1.04245	0.759427	-0.456483	Down		barcode9272.txt	1.11403	0.804556	-0.469022	Down
barcode9291.txt	0.171745	0.11991	-0.514716	Down		barcode9291.txt	0.828297	0.119017	-2.78865	Down
barcode9293.txt	0.0798814	0.0499623	-0.666377	Down		barcode9293.txt	0.500831	0.361812	-0.467978	Down
barcode9295.txt	0.0798814	0.0299774	-1.38459	Down		barcode9295.txt	0.452674	0.376094	-0.266731	Down
barcode9311.txt	0.279585	0.179864	-0.633529	Down		barcode9311.txt	0.0931032	0.0333248	-1.45499	Down
barcode9313.txt	1.85325	1.12915	-0.714323	Down		barcode9313.txt	2.01295	1.37584	-0.548672	Down
barcode9314.txt	1.09837	0.749435	-0.550878	Down		barcode9314.txt	1.11403	0.847402	-0.394259	Down
barcode9318.txt	0.263609	0.139895	-0.909245	Down		barcode9318.txt	0.555409	0.342769	-0.694703	Down
barcode9320.txt	0.119822	0.0399699	-1.56025	Down		barcode9320.txt	0.956715	0.423701	-1.17315	Down
barcode9323.txt	0.678992	0.399699	-0.763	Down		barcode9323.txt	1.02413	0.633171	-0.692869	Down
barcode9327.txt	0.395413	0.229827	-0.780194	Down		barcode9327.txt	0.311414	0.13806	-1.16775	Down
barcode9331.txt	1.59363	0.869345	-0.873567	Down		barcode9331.txt	1.79464	1.19017	-0.59212	Down
barcode9333.txt	1.57366	1.04921	-0.584368	Down		barcode9333.txt	1.80106	1.20445	-0.580074	Down
barcode9337.txt	0.0239644	0	-4.6418	Down		barcode9337.txt	0.205469	0.0523676	-1.95189	Down
barcode9338.txt	0.175739	0.0199849	-3.0742	Down		barcode9338.txt	0.263257	0.171385	-0.616311	Down
barcode9339.txt	0.175739	0.0199849	-3.0742	Down		barcode9339.txt	0.266468	0.171385	-0.633733	Down
barcode9346.txt	0.0319526	0.0199849	-0.651037	Down		barcode9346.txt	0.574671	0.0904531	-2.65414	Down
barcode9347.txt	0.0199704	0	-4.39028	Down		barcode9347.txt	0.369202	0.266598	-0.468244	Down
barcode9349.txt	0.0359466	0.00999247	-1.74893	Down		barcode9349.txt	0.382044	0.0904531	-2.06641	Down
barcode9351.txt	0.387425	0.0499623	-2.93013	Down		barcode9351.txt	0.895717	0.371334	-1.26806	Down
barcode9352.txt	0.151775	0.0299774	-2.30212	Down		barcode9352.txt	0.195838	0.0142821	-3.6871	Down
barcode9361.txt	1.55769	1.25905	-0.30685	Down		barcode9361.txt	2.28905	1.68052	-0.445613	Down
barcode9389.txt	0.674998	0.489631	-0.462381	Down		barcode9389.txt	0.42378	0.318966	-0.408797	Down
barcode9390.txt	0.0678992	0.0499623	-0.435056	Down		barcode9390.txt	0.487989	0.214231	-1.18392	Down
barcode9396.txt	1.40591	1.06919	-0.394661	Down		barcode9396.txt	1.3805	1.05211	-0.391572	Down
barcode9404.txt	0.611093	0.469646	-0.379109	Down		barcode9404.txt	1.00166	0.661736	-0.59733	Down
barcode942.txt	0.519229	0.249812	-1.05254	Down		barcode942.txt	0.802614	0.352291	-1.18565	Down
barcode9420.txt	0.399407	0.239819	-0.733517	Down		barcode9420.txt	0.648512	0.333248	-0.958436	Down
barcode9434.txt	0.439348	0.299774	-0.549964	Down		barcode9434.txt	0.343519	0.285641	-0.265336	Down
barcode9448.txt	0.251626	0.0399699	-2.62437	Down		barcode9448.txt	0.590724	0.271359	-1.11941	Down
barcode947.txt	0.619081	0.509616	-0.280219	Down		barcode947.txt	0.754457	0.55224	-0.449444	Down
barcode9470.txt	0.934613	0.599548	-0.639632	Down		barcode9470.txt	1.40939	0.818838	-0.782682	Down
barcode9488.txt	0.535206	0.239819	-1.15484	Down		barcode9488.txt	0.523304	0.41894	-0.320219	Down
barcode9496.txt	0.0119822	0	-3.69846	Down		barcode9496.txt	0.263257	0.0952137	-1.45763	Down
barcode9513.txt	0.171745	0.109917	-0.639162	Down		barcode9513.txt	0.507252	0.0618889	-3.01467	Down
barcode9518.txt	0.43136	0.199849	-1.10612	Down		barcode9518.txt	0.600355	0.333248	-0.847297	Down
barcode952.txt	0.583134	0.489631	-0.251662	Down		barcode952.txt	0.908559	0.699821	-0.37612	Down
barcode9525.txt	0.00399407	0	-2.32022	Down		barcode9525.txt	0.21189	0.0904531	-1.219	Down
barcode955.txt	0.866713	0.509616	-0.764981	Down		barcode955.txt	0.744825	0.599847	-0.311841	Down
barcode9559.txt	0.303549	0.199849	-0.600563	Down		barcode9559.txt	0.664564	0.385616	-0.783677	Down
barcode9561.txt	2.10887	1.16912	-0.850499	Down		barcode9561.txt	1.83959	1.49486	-0.299197	Down
barcode9564.txt	0.287573	0.129902	-1.14045	Down		barcode9564.txt	0.523304	0.161863	-1.68674	Down
barcode9569.txt	0.307543	0.169872	-0.852559	Down		barcode9569.txt	0.719142	0.557	-0.368015	Down
barcode957.txt	2.26464	1.57881	-0.520167	Down		barcode957.txt	1.92948	1.5377	-0.327248	Down
barcode9580.txt	0.231656	0.159879	-0.532219	Down		barcode9580.txt	0.478358	0.295163	-0.694713	Down
barcode9589.txt	0.994524	0.589555	-0.753383	Down		barcode9589.txt	1.04982	0.852163	-0.30062	Down
barcode9601.txt	0.503253	0.379714	-0.405441	Down		barcode9601.txt	0.674195	0.295163	-1.18892	Down
barcode9638.txt	0.00399407	0	-2.32022	Down		barcode9638.txt	0.0674195	0.0523676	-0.358445	Down
barcode9650.txt	0.790826	0.64951	-0.283612	Down		barcode9650.txt	0.953505	0.404658	-1.23449	Down
barcode9653.txt	0.0878696	0.0599548	-0.54395	Down		barcode9653.txt	0.385255	0.252316	-0.608611	Down
barcode9664.txt	0.714939	0.479638	-0.574884	Down		barcode9664.txt	1.05303	0.728385	-0.531162	Down
barcode9672.txt	0.399407	0.139895	-1.50685	Down		barcode9672.txt	1.5346	0.656975	-1.2227	Down
barcode9673.txt	0.77485	0.539593	-0.521234	Down		barcode9673.txt	1.01771	0.847402	-0.263929	Down
barcode9675.txt	0.603105	0.329751	-0.869052	Down		barcode9675.txt	1.03056	0.361812	-1.50753	Down
barcode9692.txt	0.535206	0.239819	-1.15484	Down		barcode9692.txt	0.690248	0.409419	-0.752105	Down
barcode9694.txt	1.00251	0.64951	-0.625414	Down		barcode9694.txt	0.937453	0.633171	-0.565411	Down
barcode9698.txt	0.527217	0.249812	-1.07453	Down		barcode9698.txt	0.414149	0.290402	-0.510617	Down
barcode9715.txt	0.495265	0.409691	-0.273057	Down		barcode9715.txt	0.975978	0.371334	-1.39173	Down
barcode9716.txt	2.17677	1.35898	-0.67927	Down		barcode9716.txt	1.74649	1.21874	-0.518713	Down
barcode9720.txt	0.0119822	0	-3.69846	Down		barcode9720.txt	0.536146	0.0571282	-3.208	Down
barcode9723.txt	0.571152	0.169872	-1.74348	Down		barcode9723.txt	0.609986	0.299923	-1.02174	Down
barcode973.txt	0.595117	0.469646	-0.340953	Down		barcode973.txt	1.34518	0.385616	-1.7999	Down
barcode9737.txt	1.16627	0.839367	-0.474045	Down		barcode9737.txt	1.4736	1.2235	-0.268133	Down
barcode9742.txt	0.587128	0.339744	-0.787444	Down		barcode9742.txt	1.0434	0.323727	-1.68537	Down
barcode9752.txt	1.03846	0.679488	-0.611191	Down		barcode9752.txt	1.1044	0.428462	-1.36396	Down
barcode9758.txt	0.563164	0.439668	-0.356421	Down		barcode9758.txt	0.773719	0.390376	-0.985117	Down
barcode9766.txt	0.435354	0.159879	-1.43952	Down		barcode9766.txt	0.622828	0.409419	-0.604051	Down
barcode9767.txt	0.659022	0.359729	-0.871599	Down		barcode9767.txt	1.15576	0.680778	-0.762719	Down
barcode9769.txt	0.746891	0.619533	-0.269321	Down		barcode9769.txt	1.29702	1.00927	-0.361582	Down
barcode9777.txt	1.49778	0.80939	-0.887098	Down		barcode9777.txt	1.19108	0.856924	-0.474558	Down
barcode9779.txt	0.88269	0.739442	-0.255152	Down		barcode9779.txt	0.995241	0.395137	-1.33049	Down
barcode9791.txt	0.367455	0.199849	-0.875373	Down		barcode9791.txt	0.831508	0.0999744	-3.04347	Down
barcode9796.txt	0.0718933	0.0299774	-1.23457	Down		barcode9796.txt	0.56825	0.185667	-1.6086	Down
barcode9798.txt	0.123816	0.00999247	-3.50522	Down		barcode9798.txt	0.227942	0	-7.83884	Down
barcode9802.txt	0.0599111	0.00999247	-2.47019	Down		barcode9802.txt	0.715931	0.590325	-0.277883	Down
barcode9829.txt	0.23565	0.0899322	-1.37989	Down		barcode9829.txt	1.01771	0.233274	-2.12048	Down
barcode984.txt	1.34201	0.969269	-0.469011	Down		barcode984.txt	1.71117	0.975941	-0.809485	Down
barcode9840.txt	0.778844	0.569571	-0.45078	Down		barcode9840.txt	0.796193	0.618889	-0.362918	Down
barcode9845.txt	0.12781	0.0499623	-1.33774	Down		barcode9845.txt	0.333887	0.0952137	-1.79936	Down
barcode9863.txt	0.986536	0.709465	-0.475069	Down		barcode9863.txt	0.934242	0.756949	-0.303239	Down
barcode9868.txt	0.591123	0.479638	-0.300944	Down		barcode9868.txt	0.401307	0.290402	-0.465286	Down
barcode9869.txt	0.403401	0.169872	-1.24287	Down		barcode9869.txt	0.324256	0.166624	-0.956346	Down
barcode9870.txt	0.347484	0.229827	-0.594283	Down		barcode9870.txt	0.735194	0.499872	-0.555644	Down
barcode9883.txt	0.698962	0.529601	-0.399651	Down		barcode9883.txt	1.05303	0.442744	-1.24812	Down
barcode9884.txt	0.651034	0.509616	-0.352708	Down		barcode9884.txt	0.715931	0.247556	-1.52827	Down
barcode9885.txt	0.555176	0.169872	-1.70263	Down		barcode9885.txt	0.629249	0.252316	-1.31498	Down
barcode992.txt	0.207692	0.109917	-0.911891	Down		barcode992.txt	0.56504	0.242795	-1.21524	Down
barcode9923.txt	0.718933	0.519608	-0.467664	Down		barcode9923.txt	0.42699	0.357052	-0.257411	Down
barcode993.txt	1.0105	0.759427	-0.411614	Down		barcode993.txt	1.1044	0.652214	-0.758936	Down
barcode9934.txt	1.04645	0.859352	-0.283878	Down		barcode9934.txt	1.26813	1.02355	-0.308852	Down
barcode9935.txt	3.87425	2.96776	-0.384427	Down		barcode9935.txt	3.03388	2.30417	-0.396764	Down
barcode9936.txt	3.94215	3.07768	-0.357036	Down		barcode9936.txt	3.06598	2.35654	-0.379538	Down
barcode9939.txt	2.12085	1.42892	-0.569387	Down		barcode9939.txt	1.95196	1.05211	-0.891001	Down
barcode9940.txt	0.615087	0.329751	-0.897387	Down		barcode9940.txt	1.29381	0.652214	-0.987116	Down
barcode9945.txt	0.802808	0.589555	-0.444779	Down		barcode9945.txt	1.5057	0.41894	-1.84314	Down
barcode9960.txt	1.09038	0.889329	-0.293744	Down		barcode9960.txt	1.28097	0.818838	-0.644953	Down
barcode9969.txt	1.10236	0.569571	-0.951431	Down		barcode9969.txt	0.924611	0.528436	-0.805949	Down
barcode9976.txt	0.90266	0.64951	-0.474208	Down		barcode9976.txt	1.52176	0.799795	-0.927178	Down
barcode9986.txt	0.710945	0.519608	-0.451567	Down		barcode9986.txt	0.687037	0.371334	-0.885891	Down
barcode9990.txt	0.199704	0.159879	-0.319086	Down		barcode9990.txt	0.388465	0.142821	-1.43722	Down
barcode9992.txt	0.219674	0.159879	-0.455936	Down		barcode9992.txt	0.468726	0.218992	-1.09437	Down
barcode9999.txt	0.395413	0.199849	-0.980891	Down		barcode9999.txt	1.06908	0.20471	-2.37904	Down
