# Supplementary material for: CRISPR Screen Identifies the RNA-Binding Protein Eef1a1 as a Key Regulator of Myogenesis
Source: Int J Mol Sci. 2024 Apr 28;25(9):4816. doi: 10.3390/ijms25094816 (PMC11084334; doi:10.3390/ijms25094816)
Supplement: Supplementary file 1 [file ijms-25-04816-s001.zip › Supplemental Table S5. Oligonucleotides used in this study.xls]

## Sheet: Sheet1
Primer name	Sequence (5' to 3')
Eef1a1-CRISPRi-sg1-F	CACCGCCGTCAGAACGCAGGTGAG
Eef1a1-CRISPRi-sg1-R	AAACCTCACCTGCGTTCTGACGGC
Eef1a1-CRISPRi-sg2-F	CACCGTGCCGTCAGAACGCAGGTGA
Eef1a1-CRISPRi-sg2-R	AAACTCACCTGCGTTCTGACGGCAC
Eef1a1-CRISPRi-sg3-F	CACCGTCAGAACGCAGGTGAGGGGC
Eef1a1-CRISPRi-sg3-R	AAACGCCCCTCACCTGCGTTCTGAC
Eef1a1-CRISPRko-sg1-F	CACCGAGTCGCAGGGGCTTGTCAGT
Eef1a1-CRISPRko-sg1-R	AAACACTGACAAGCCCCTGCGACTC
Eef1a1-CRISPRko-sg2-F	CACCGAGCCAGAAGAGCATGCTCGC
Eef1a1-CRISPRko-sg2-R	AAACGCGAGCATGCTCTTCTGGCTC
OE-Eef1a1-F	GGGAGACCCAAGCTGGCTAGATGGGAAAGGAAAAGACTCACATCAAC
OE-Eef1a1-R	AACGGGCCCTCTAGACTCGATCATTTAGCCTTCTGAGCTTTCTGGG
si1-Eef1a1	ACCAGCAAATACTATGTGA
si2-Eef1a1	TCAGAAGAGATACGAGGAA
si3-Eef1a1	AGAAGAGATACGAGGAAAT
