# Supplementary material for: CRISPR Screen Identifies the RNA-Binding Protein Eef1a1 as a Key Regulator of Myogenesis
Source: Int J Mol Sci. 2024 Apr 28;25(9):4816. doi: 10.3390/ijms25094816 (PMC11084334; doi:10.3390/ijms25094816)
Supplement: Supplementary file 1 [file ijms-25-04816-s001.zip › Supplemental Table S6. Primer sequences for RT-qPCR..xls]

## Sheet: Sheet1
Primer name	Sequence (5' to 3')
Eef1a1-F	GACAAGCGAACCATCGAAAAGT
Eef1a1-R	TCCACAGGGAGATGTCAATAGT
Ki67-F	TGCCCGACCCTACAAAATG
Ki67-R	GAGCCTGTATCACTCATCTGC
PCNA-F	GGGTGAAGTTTTCTGCAAGTG
PCNA-R	GTACCTCAGAGCAAACGTTAGG
CDK4-F	ACAAGTAATGGGACCGTCAAG
CDK4-R	GGGTGTTGCGTATGTAGACTG
MyoD-F	CCACTCCGGGACATAGACTTG
MyoD-R	AAAAGCGCAGGTCTGGTGAG
MyoG-F	CCATCCAGTACATTGAGCGCCTACA
MyoG-R	ACGATGGACGTAAGGGAGTGCAGAT
MyHC-F	GCCTGGGCTTACCTCTCTATCAC
MyHC-R	CTTCTCAGACTTCCGCAGGAA
myomixer-F	CGCCTGCTGCTGCCTGTT
myomixer-R	GGCTGTTGCTGGCTGAGGAC
myomaker-F	CCATCGCTGTGCGGACTT
myomaker-R	CTCTTTCATCTTCTTCAGCCACTTT
GAPDH-F	AGAACATCATCCCTGCATCC
GAPDH-R	GGTCCTCAGTGTAGCCCAAG
β-actin-F	GCCTCACTGTCCACCTTCC
β-actin-R	AGCCATGCCAATGTTGTCTCTT
U6-F	CTCGCTTCGGCAGCACA
U6-R	AACGCTTCACGAATTTGCGT
miR-133a-3p-F	GCGTTTGGTCCCCTTCAAC
miR-133a-3p-R	AGTGCAGGGTCCGAGGTATT
miR-133a-3p stem-loop	GTCGTATCCAGTGCAGGGTCCGAGGTATTCGCACTGGATACGACCAGCTG
miR-499-5p-F	GCGCGTTAAGACTTGCAGTG
miR-499-5p-R	AGTGCAGGGTCCGAGGTATT
miR-499-5p stem-loop	GTCGTATCCAGTGCAGGGTCCGAGGTATTCGCACTGGATACGACAAACAT
